# Supplementary material for: Prognostic and therapeutic roles of SETD2 in cutaneous melanoma
Source: Aging (Albany NY). 2024 Jun 5;16(11):9692–708. doi: 10.18632/aging.205894 (PMC11210245; doi:10.18632/aging.205894)
Supplement: Supplementary Table 1 [file aging-16-205894-s002.xlsx]

## Sheet: Supplementary Table1
Supplementary Table 1. The SETD mRNA expression levels in TCGA-SKCM samples.
Cancer types	Group	Expression	SampleName			Cancer types	Group	Expression	SampleName			Cancer types	Group	Expression	SampleName
SKCM(T=102,N=558)	Tumor	3.7389	TCGA-FR-A3R1-01			SKCM(T=102,N=558)	Normal	3.6066	GTEX-13FTY-0526-SM-5L3EV			SKCM(T=102,N=558)	Normal	4.2404	GTEX-1497J-0226-SM-5QGPU
SKCM(T=102,N=558)	Tumor	3.3032	TCGA-EB-A41A-01			SKCM(T=102,N=558)	Normal	4.2706	GTEX-11P81-2226-SM-5PNYI			SKCM(T=102,N=558)	Normal	4.0189	GTEX-ZF28-0126-SM-4WKGK
SKCM(T=102,N=558)	Tumor	1.412	TCGA-BF-A5ER-01			SKCM(T=102,N=558)	Normal	3.9682	GTEX-11EM3-1226-SM-5N9DD			SKCM(T=102,N=558)	Normal	4.2571	GTEX-ZDTT-2726-SM-4WKF8
SKCM(T=102,N=558)	Tumor	3.5633	TCGA-EB-A44O-01			SKCM(T=102,N=558)	Normal	3.864	GTEX-14A5H-0826-SM-5QGPJ			SKCM(T=102,N=558)	Normal	4.347	GTEX-T8EM-1026-SM-3DB7M
SKCM(T=102,N=558)	Tumor	4.2943	TCGA-ER-A19T-01			SKCM(T=102,N=558)	Normal	3.5766	GTEX-ZVT2-2526-SM-51MT1			SKCM(T=102,N=558)	Normal	4.5349	GTEX-11EI6-0126-SM-5985R
SKCM(T=102,N=558)	Tumor	3.0181	TCGA-EB-A6QZ-01			SKCM(T=102,N=558)	Normal	4.0679	GTEX-13OVI-1426-SM-5L3EY			SKCM(T=102,N=558)	Normal	4.1883	GTEX-13O3O-2326-SM-5IJD6
SKCM(T=102,N=558)	Tumor	3.3591	TCGA-XV-AAZW-01			SKCM(T=102,N=558)	Normal	3.8866	GTEX-111VG-2426-SM-5GZXD			SKCM(T=102,N=558)	Normal	4.1036	GTEX-12584-0726-SM-5FQTK
SKCM(T=102,N=558)	Tumor	1.2085	TCGA-XV-AAZY-01			SKCM(T=102,N=558)	Normal	3.3605	GTEX-YEC3-1326-SM-5PNXV			SKCM(T=102,N=558)	Normal	4.096	GTEX-ZC5H-1526-SM-5HL9Y
SKCM(T=102,N=558)	Tumor	4.38	TCGA-BF-AAP1-01			SKCM(T=102,N=558)	Normal	3.8187	GTEX-117YX-1926-SM-5GIEC			SKCM(T=102,N=558)	Normal	4.3744	GTEX-11WQC-2526-SM-5CVLE
SKCM(T=102,N=558)	Tumor	3.2466	TCGA-BF-AAP2-01			SKCM(T=102,N=558)	Normal	3.8023	GTEX-111FC-2526-SM-5GZXU			SKCM(T=102,N=558)	Normal	4.232	GTEX-XUW1-0426-SM-4BOOT
SKCM(T=102,N=558)	Tumor	2.8096	TCGA-EB-A5SE-01			SKCM(T=102,N=558)	Normal	4.2758	GTEX-1399T-2826-SM-5KLYZ			SKCM(T=102,N=558)	Normal	4.4542	GTEX-11EQ8-0926-SM-5H12V
SKCM(T=102,N=558)	Tumor	3.7709	TCGA-EB-A431-01			SKCM(T=102,N=558)	Normal	3.5009	GTEX-145MN-2226-SM-5SIAU			SKCM(T=102,N=558)	Normal	4.427	GTEX-13SLW-0126-SM-5SI6C
SKCM(T=102,N=558)	Tumor	3.4933	TCGA-EB-A24C-01			SKCM(T=102,N=558)	Normal	4.0816	GTEX-13OVL-0226-SM-5L3E9			SKCM(T=102,N=558)	Normal	3.3883	GTEX-W5X1-2526-SM-3GILC
SKCM(T=102,N=558)	Tumor	3.5287	TCGA-EB-A3XB-01			SKCM(T=102,N=558)	Normal	3.835	GTEX-13N11-2526-SM-5K7UE			SKCM(T=102,N=558)	Normal	3.835	GTEX-1313W-0626-SM-5EQ4H
SKCM(T=102,N=558)	Tumor	3.6324	TCGA-EB-A551-01			SKCM(T=102,N=558)	Normal	4.3328	GTEX-V1D1-2226-SM-3NMAX			SKCM(T=102,N=558)	Normal	4.1506	GTEX-WY7C-2126-SM-3NB2R
SKCM(T=102,N=558)	Tumor	3.1442	TCGA-BF-A1PZ-01			SKCM(T=102,N=558)	Normal	3.9938	GTEX-1399Q-2326-SM-5KM2X			SKCM(T=102,N=558)	Normal	3.7432	GTEX-13RTJ-2426-SM-5S2Q2
SKCM(T=102,N=558)	Tumor	3.5815	TCGA-EB-A3Y6-01			SKCM(T=102,N=558)	Normal	3.8581	GTEX-ZPIC-1726-SM-57WF2			SKCM(T=102,N=558)	Normal	3.8759	GTEX-13FH7-2026-SM-5IJCR
SKCM(T=102,N=558)	Tumor	1.5661	TCGA-EB-A4OZ-01			SKCM(T=102,N=558)	Normal	4.0189	GTEX-11OC5-0126-SM-5HL6A			SKCM(T=102,N=558)	Normal	4.2616	GTEX-13O3P-0126-SM-5KM4S
SKCM(T=102,N=558)	Tumor	2.8819	TCGA-ER-A19K-01			SKCM(T=102,N=558)	Normal	3.927	GTEX-XYKS-2126-SM-4E3IB			SKCM(T=102,N=558)	Normal	4.3848	GTEX-12C56-1526-SM-5FQUQ
SKCM(T=102,N=558)	Tumor	2.8096	TCGA-EB-A85J-01			SKCM(T=102,N=558)	Normal	3.9929	GTEX-11GS4-2726-SM-5A5LE			SKCM(T=102,N=558)	Normal	3.8411	GTEX-11DYG-0126-SM-59883
SKCM(T=102,N=558)	Tumor	3.9506	TCGA-ER-A42H-01			SKCM(T=102,N=558)	Normal	4.4945	GTEX-133LE-1826-SM-5J1MV			SKCM(T=102,N=558)	Normal	4.1228	GTEX-X4EO-2926-SM-4E3JH
SKCM(T=102,N=558)	Tumor	2.5658	TCGA-BF-AAOX-01			SKCM(T=102,N=558)	Normal	4.1449	GTEX-1399U-1126-SM-5L3DB			SKCM(T=102,N=558)	Normal	4.0153	GTEX-ZYVF-0926-SM-5E44J
SKCM(T=102,N=558)	Tumor	2.0673	TCGA-BF-A5EO-01			SKCM(T=102,N=558)	Normal	4.5826	GTEX-145MI-0626-SM-5SI8S			SKCM(T=102,N=558)	Normal	3.7237	GTEX-QEG4-0226-SM-2S1PY
SKCM(T=102,N=558)	Tumor	2.9338	TCGA-HR-A5NC-01			SKCM(T=102,N=558)	Normal	3.3745	GTEX-ZTX8-1326-SM-4YCEL			SKCM(T=102,N=558)	Normal	3.9571	GTEX-WH7G-2326-SM-3NMBC
SKCM(T=102,N=558)	Tumor	3.3897	TCGA-XV-A9W5-01			SKCM(T=102,N=558)	Normal	3.7496	GTEX-O5YW-0126-SM-3LK6D			SKCM(T=102,N=558)	Normal	4.2825	GTEX-Y8E4-0626-SM-4WWDL
SKCM(T=102,N=558)	Tumor	3.1129	TCGA-D9-A4Z3-01			SKCM(T=102,N=558)	Normal	4.0019	GTEX-U8T8-0126-SM-3DB94			SKCM(T=102,N=558)	Normal	3.8973	GTEX-XOTO-0126-SM-4B66N
SKCM(T=102,N=558)	Tumor	3.4687	TCGA-WE-A8K4-01			SKCM(T=102,N=558)	Normal	4.5255	GTEX-14DAQ-0126-SM-5S2MQ			SKCM(T=102,N=558)	Normal	3.0411	GTEX-WI4N-2726-SM-3LK7Y
SKCM(T=102,N=558)	Tumor	3.8095	TCGA-EB-A4IS-01			SKCM(T=102,N=558)	Normal	2.2813	GTEX-13PVQ-0126-SM-5SIB4			SKCM(T=102,N=558)	Normal	4.0892	GTEX-145LV-2126-SM-5LU8N
SKCM(T=102,N=558)	Tumor	2.2051	TCGA-BF-A9VF-01			SKCM(T=102,N=558)	Normal	3.9617	GTEX-12ZZX-0126-SM-5EGK9			SKCM(T=102,N=558)	Normal	4.1302	GTEX-11P82-1626-SM-59879
SKCM(T=102,N=558)	Tumor	2.8014	TCGA-EB-A3XD-01			SKCM(T=102,N=558)	Normal	3.6748	GTEX-13FTW-2626-SM-5K7WL			SKCM(T=102,N=558)	Normal	4.1668	GTEX-11ZU8-0126-SM-5EQ58
SKCM(T=102,N=558)	Tumor	3.1228	TCGA-BF-A5EQ-01			SKCM(T=102,N=558)	Normal	3.8054	GTEX-ZDTT-0426-SM-4WKFL			SKCM(T=102,N=558)	Normal	4.3548	GTEX-13OW6-0426-SM-5L3HM
SKCM(T=102,N=558)	Tumor	3.2002	TCGA-EB-A41B-01			SKCM(T=102,N=558)	Normal	4.3827	GTEX-ZC5H-0226-SM-4WAY9			SKCM(T=102,N=558)	Normal	3.7709	GTEX-XOT4-0626-SM-4B66L
SKCM(T=102,N=558)	Tumor	4.079	TCGA-XV-A9VZ-01			SKCM(T=102,N=558)	Normal	4.1756	GTEX-139T4-0226-SM-5HL5S			SKCM(T=102,N=558)	Normal	4.4977	GTEX-14A6H-2026-SM-5Q5DD
SKCM(T=102,N=558)	Tumor	3.5149	TCGA-EB-A3XC-01			SKCM(T=102,N=558)	Normal	4.2518	GTEX-145MO-2826-SM-5LU96			SKCM(T=102,N=558)	Normal	3.7762	GTEX-X4XX-0126-SM-3NMC2
SKCM(T=102,N=558)	Tumor	3.795	TCGA-EB-A44N-01			SKCM(T=102,N=558)	Normal	4.4169	GTEX-ZXG5-2126-SM-59HKD			SKCM(T=102,N=558)	Normal	4.0225	GTEX-113IC-0126-SM-5HL6T
SKCM(T=102,N=558)	Tumor	3.8481	TCGA-EB-A24D-01			SKCM(T=102,N=558)	Normal	3.773	GTEX-XV7Q-1826-SM-4BRUV			SKCM(T=102,N=558)	Normal	4.0593	GTEX-11P7K-2126-SM-5GU7G
SKCM(T=102,N=558)	Tumor	2.496	TCGA-BF-AAOU-01			SKCM(T=102,N=558)	Normal	3.9318	GTEX-ZQUD-1426-SM-57WER			SKCM(T=102,N=558)	Normal	4.1772	GTEX-XQ8I-0926-SM-4BOOF
SKCM(T=102,N=558)	Tumor	3.5098	TCGA-ER-A196-01			SKCM(T=102,N=558)	Normal	4.1128	GTEX-145MF-0626-SM-5LUAI			SKCM(T=102,N=558)	Normal	4.3213	GTEX-WK11-2726-SM-3NMAQ
SKCM(T=102,N=558)	Tumor	4.1628	TCGA-BF-A3DN-01			SKCM(T=102,N=558)	Normal	4.0782	GTEX-13U4I-0126-SM-5LU38			SKCM(T=102,N=558)	Normal	3.8411	GTEX-S3XE-1726-SM-3K2AM
SKCM(T=102,N=558)	Tumor	3.9865	TCGA-BF-AAP6-01			SKCM(T=102,N=558)	Normal	3.8739	GTEX-11DZ1-2426-SM-5GZZX			SKCM(T=102,N=558)	Normal	3.5047	GTEX-ZVTK-0426-SM-51MRS
SKCM(T=102,N=558)	Tumor	2.9432	TCGA-XV-A9W2-01			SKCM(T=102,N=558)	Normal	4.6053	GTEX-ZTX8-1426-SM-5DUVO			SKCM(T=102,N=558)	Normal	4.0985	GTEX-R55G-2526-SM-2TC6D
SKCM(T=102,N=558)	Tumor	1.9749	TCGA-IH-A3EA-01			SKCM(T=102,N=558)	Normal	4.5053	GTEX-14BIN-1126-SM-5RQJZ			SKCM(T=102,N=558)	Normal	3.6623	GTEX-YECK-0326-SM-4W1YS
SKCM(T=102,N=558)	Tumor	2.7095	TCGA-FR-A728-01			SKCM(T=102,N=558)	Normal	4.1153	GTEX-11NUK-2726-SM-5A5MC			SKCM(T=102,N=558)	Normal	4.546	GTEX-Y5V5-2326-SM-4V6GA
SKCM(T=102,N=558)	Tumor	4.3184	TCGA-FW-A5DX-01			SKCM(T=102,N=558)	Normal	4.4777	GTEX-13111-1626-SM-5EGJY			SKCM(T=102,N=558)	Normal	4.048	GTEX-OOBK-0126-SM-2YUND
SKCM(T=102,N=558)	Tumor	2.0979	TCGA-BF-AAP8-01			SKCM(T=102,N=558)	Normal	4.9036	GTEX-WFON-2126-SM-3LK7O			SKCM(T=102,N=558)	Normal	4.5047	GTEX-TMMY-0226-SM-33HBA
SKCM(T=102,N=558)	Tumor	2.8858	TCGA-EB-A430-01			SKCM(T=102,N=558)	Normal	4.1523	GTEX-13IVO-0126-SM-5J1NG			SKCM(T=102,N=558)	Normal	3.3393	GTEX-1399R-1326-SM-5PNYS
SKCM(T=102,N=558)	Tumor	3.2112	TCGA-BF-AAP4-01			SKCM(T=102,N=558)	Normal	4.0445	GTEX-11EM3-2426-SM-59861			SKCM(T=102,N=558)	Normal	3.865	GTEX-13O3Q-2426-SM-5IJBR
SKCM(T=102,N=558)	Tumor	2.7073	TCGA-GN-A263-01			SKCM(T=102,N=558)	Normal	4.2714	GTEX-13OVL-0126-SM-5L3GJ			SKCM(T=102,N=558)	Normal	4.3234	GTEX-147F3-1726-SM-5SIAW
SKCM(T=102,N=558)	Tumor	2.5561	TCGA-EB-A1NK-01			SKCM(T=102,N=558)	Normal	3.8481	GTEX-XK95-0226-SM-4AT58			SKCM(T=102,N=558)	Normal	3.5312	GTEX-13W3W-0726-SM-5IJDQ
SKCM(T=102,N=558)	Tumor	1.8722	TCGA-BF-AAP7-01			SKCM(T=102,N=558)	Normal	4.0558	GTEX-X4EP-0626-SM-3P621			SKCM(T=102,N=558)	Normal	4.382	GTEX-12WSC-2826-SM-5BC5Y
SKCM(T=102,N=558)	Tumor	4.0901	TCGA-FS-A1ZN-01			SKCM(T=102,N=558)	Normal	3.5535	GTEX-ZYFG-1526-SM-5GZYM			SKCM(T=102,N=558)	Normal	3.9856	GTEX-147F4-0226-SM-5QGPW
SKCM(T=102,N=558)	Tumor	3.7518	TCGA-EB-A51B-01			SKCM(T=102,N=558)	Normal	3.9792	GTEX-TML8-1926-SM-32QOS			SKCM(T=102,N=558)	Normal	3.8126	GTEX-13NYB-2526-SM-5K7Z6
SKCM(T=102,N=558)	Tumor	3.945	TCGA-BF-A1Q0-01			SKCM(T=102,N=558)	Normal	3.5633	GTEX-13NZB-2526-SM-5J1OM			SKCM(T=102,N=558)	Normal	4.4176	GTEX-139TU-0126-SM-5K7WH
SKCM(T=102,N=558)	Tumor	3.2112	TCGA-GN-A4U5-01			SKCM(T=102,N=558)	Normal	4.2951	GTEX-14E6E-1826-SM-5S2R7			SKCM(T=102,N=558)	Normal	4.5602	GTEX-X261-0126-SM-3NMD6
SKCM(T=102,N=558)	Tumor	3.0927	TCGA-EB-A550-01			SKCM(T=102,N=558)	Normal	4.0619	GTEX-ZLWG-0826-SM-59888			SKCM(T=102,N=558)	Normal	4.3674	GTEX-11O72-0126-SM-59887
SKCM(T=102,N=558)	Tumor	2.7572	TCGA-BF-A1PX-01			SKCM(T=102,N=558)	Normal	4.2381	GTEX-13W3W-2426-SM-5LU5B			SKCM(T=102,N=558)	Normal	3.9487	GTEX-XBEC-0726-SM-4QARZ
SKCM(T=102,N=558)	Tumor	1.5465	TCGA-DA-A960-01			SKCM(T=102,N=558)	Normal	3.6148	GTEX-11TT1-2526-SM-5EGIB			SKCM(T=102,N=558)	Normal	4.1923	GTEX-13W46-0226-SM-5SIAG
SKCM(T=102,N=558)	Tumor	2.2813	TCGA-EB-A97M-01			SKCM(T=102,N=558)	Normal	3.6207	GTEX-YB5K-2026-SM-4VDT3			SKCM(T=102,N=558)	Normal	4.1812	GTEX-S7SF-1626-SM-3K2AY
SKCM(T=102,N=558)	Tumor	4.1186	TCGA-EB-A5VU-01			SKCM(T=102,N=558)	Normal	4.0091	GTEX-OHPL-0126-SM-2HMJ7			SKCM(T=102,N=558)	Normal	3.5111	GTEX-Z93T-0126-SM-5HL5N
SKCM(T=102,N=558)	Tumor	4.2064	TCGA-D9-A3Z4-01			SKCM(T=102,N=558)	Normal	3.7443	GTEX-11ZTT-2126-SM-5CVLO			SKCM(T=102,N=558)	Normal	3.6066	GTEX-13O21-1426-SM-5K7XI
SKCM(T=102,N=558)	Tumor	3.7593	TCGA-EB-A44P-01			SKCM(T=102,N=558)	Normal	3.8116	GTEX-P4PP-0126-SM-3LK69			SKCM(T=102,N=558)	Normal	3.5994	GTEX-XBEW-1126-SM-4QARW
SKCM(T=102,N=558)	Tumor	3.5923	TCGA-EB-A42Z-01			SKCM(T=102,N=558)	Normal	4.2312	GTEX-11ZU8-2526-SM-5EQKI			SKCM(T=102,N=558)	Normal	4.3313	GTEX-WHSE-0126-SM-3NMBT
SKCM(T=102,N=558)	Tumor	3.603	TCGA-EB-A42Y-01			SKCM(T=102,N=558)	Normal	4.197	GTEX-WEY5-2326-SM-3GIKK			SKCM(T=102,N=558)	Normal	4.0739	GTEX-13NYC-0326-SM-5K7WP
SKCM(T=102,N=558)	Tumor	3.3814	TCGA-GF-A2C7-01			SKCM(T=102,N=558)	Normal	3.695	GTEX-XPVG-2126-SM-4B667			SKCM(T=102,N=558)	Normal	4.4297	GTEX-14B4R-1326-SM-5Q5EZ
SKCM(T=102,N=558)	Tumor	0.2522	TCGA-EB-A4OY-01			SKCM(T=102,N=558)	Normal	4.1523	GTEX-ZE9C-2526-SM-5IJDR			SKCM(T=102,N=558)	Normal	3.9079	GTEX-NPJ8-0126-SM-2YUNR
SKCM(T=102,N=558)	Tumor	2.2723	TCGA-YG-AA3N-01			SKCM(T=102,N=558)	Normal	3.927	GTEX-11ZUS-2626-SM-5FQUR			SKCM(T=102,N=558)	Normal	3.4726	GTEX-12126-0326-SM-5PNW3
SKCM(T=102,N=558)	Tumor	-0.2159	TCGA-EB-A5SF-01			SKCM(T=102,N=558)	Normal	4.298	GTEX-12696-2426-SM-5EQ6H			SKCM(T=102,N=558)	Normal	4.2465	GTEX-OXRK-0226-SM-3NB2G
SKCM(T=102,N=558)	Tumor	3.4609	TCGA-EB-A82C-01			SKCM(T=102,N=558)	Normal	3.5694	GTEX-ZAJG-0126-SM-5HL94			SKCM(T=102,N=558)	Normal	4.4423	GTEX-1192X-0226-SM-5H12D
SKCM(T=102,N=558)	Tumor	2.4701	TCGA-EB-A82B-01			SKCM(T=102,N=558)	Normal	4.287	GTEX-13OW5-2326-SM-5L3HO			SKCM(T=102,N=558)	Normal	3.9543	GTEX-X8HC-0626-SM-4E3HQ
SKCM(T=102,N=558)	Tumor	3.3842	TCGA-GF-A769-01			SKCM(T=102,N=558)	Normal	4.3104	GTEX-11LCK-2226-SM-5HL4Q			SKCM(T=102,N=558)	Normal	4.0645	GTEX-11DXY-2626-SM-5GIE7
SKCM(T=102,N=558)	Tumor	1.5806	TCGA-D3-A5GT-01			SKCM(T=102,N=558)	Normal	3.8471	GTEX-1211K-2026-SM-5EQ4Z			SKCM(T=102,N=558)	Normal	3.2781	GTEX-ZV7C-0926-SM-59HL1
SKCM(T=102,N=558)	Tumor	2.3135	TCGA-BF-A5EP-01			SKCM(T=102,N=558)	Normal	4.3046	GTEX-139UW-2826-SM-5L3E7			SKCM(T=102,N=558)	Normal	3.9691	GTEX-QVJO-1626-SM-2S1QW
SKCM(T=102,N=558)	Tumor	3.0825	TCGA-ER-A2NF-01			SKCM(T=102,N=558)	Normal	3.958	GTEX-ZA64-1026-SM-5HL8R			SKCM(T=102,N=558)	Normal	4.3321	GTEX-13FTW-0326-SM-5K7UW
SKCM(T=102,N=558)	Tumor	4.1392	TCGA-FR-A2OS-01			SKCM(T=102,N=558)	Normal	3.8421	GTEX-XV7Q-2526-SM-4BRV9			SKCM(T=102,N=558)	Normal	3.9487	GTEX-139TS-2126-SM-5K7XC
SKCM(T=102,N=558)	Tumor	3.9645	TCGA-BF-A3DM-01			SKCM(T=102,N=558)	Normal	3.7453	GTEX-117XS-2726-SM-5N9BL			SKCM(T=102,N=558)	Normal	4.3191	GTEX-12WSB-2926-SM-59HKL
SKCM(T=102,N=558)	Tumor	3.1162	TCGA-D9-A4Z5-01			SKCM(T=102,N=558)	Normal	4.1425	GTEX-14C39-1726-SM-5RQIL			SKCM(T=102,N=558)	Normal	3.66	GTEX-11P7K-1126-SM-5HL4L
SKCM(T=102,N=558)	Tumor	2.4198	TCGA-EB-A5UM-01			SKCM(T=102,N=558)	Normal	4.4764	GTEX-WRHK-1426-SM-3MJF9			SKCM(T=102,N=558)	Normal	3.5682	GTEX-ZP4G-1426-SM-4WWCL
SKCM(T=102,N=558)	Tumor	4.0278	TCGA-BF-A1PV-01			SKCM(T=102,N=558)	Normal	3.831	GTEX-111FC-0126-SM-5N9DL			SKCM(T=102,N=558)	Normal	3.8116	GTEX-XOTO-0726-SM-4B659
SKCM(T=102,N=558)	Tumor	3.1062	TCGA-BF-A1PU-01			SKCM(T=102,N=558)	Normal	3.9232	GTEX-13FHP-0126-SM-5IJBG			SKCM(T=102,N=558)	Normal	3.7961	GTEX-111CU-1126-SM-5EGIM
SKCM(T=102,N=558)	Tumor	1.2023	TCGA-EB-A553-01			SKCM(T=102,N=558)	Normal	4.5784	GTEX-11LCK-1026-SM-5A5KB			SKCM(T=102,N=558)	Normal	4.1571	GTEX-14DAR-2026-SM-5S2O3
SKCM(T=102,N=558)	Tumor	4.2488	TCGA-GN-A8LN-01			SKCM(T=102,N=558)	Normal	3.1377	GTEX-Y114-2126-SM-4TT8B			SKCM(T=102,N=558)	Normal	4.1368	GTEX-OXRP-0126-SM-48TDI
SKCM(T=102,N=558)	Tumor	2.4934	TCGA-EB-A57M-01			SKCM(T=102,N=558)	Normal	3.8729	GTEX-WZTO-0126-SM-3NM95			SKCM(T=102,N=558)	Normal	4.0584	GTEX-ZAK1-0626-SM-5HL8E
SKCM(T=102,N=558)	Tumor	3.7846	TCGA-EB-A5FP-01			SKCM(T=102,N=558)	Normal	3.8411	GTEX-Z93S-0126-SM-5HL7M			SKCM(T=102,N=558)	Normal	4.2072	GTEX-WRHU-2826-SM-3MJG8
SKCM(T=102,N=558)	Tumor	3.0533	TCGA-EB-A6QY-01			SKCM(T=102,N=558)	Normal	3.772	GTEX-145ME-1726-SM-5Q5EU			SKCM(T=102,N=558)	Normal	3.8461	GTEX-ZDTS-0826-SM-4WKHL
SKCM(T=102,N=558)	Tumor	3.6793	TCGA-EB-A4XL-01			SKCM(T=102,N=558)	Normal	4.1899	GTEX-ZWKS-0126-SM-5SIAA			SKCM(T=102,N=558)	Normal	4.2533	GTEX-117YX-2326-SM-5H12W
SKCM(T=102,N=558)	Tumor	2.5536	TCGA-EB-A4IQ-01			SKCM(T=102,N=558)	Normal	4.1277	GTEX-145LS-0126-SM-5QGP1			SKCM(T=102,N=558)	Normal	4.2862	GTEX-12ZZY-0726-SM-5EQ66
SKCM(T=102,N=558)	Tumor	1.7446	TCGA-EB-A3Y7-01			SKCM(T=102,N=558)	Normal	3.863	GTEX-Y8DK-0126-SM-4TT3L			SKCM(T=102,N=558)	Normal	4.3972	GTEX-14BMV-0126-SM-5S2PO
SKCM(T=102,N=558)	Tumor	4.0462	TCGA-FR-A726-01			SKCM(T=102,N=558)	Normal	3.6266	GTEX-ZDXO-3026-SM-5J1N5			SKCM(T=102,N=558)	Normal	3.7105	GTEX-12WSD-0126-SM-59HKN
SKCM(T=102,N=558)	Tumor	3.9838	TCGA-BF-A3DJ-01			SKCM(T=102,N=558)	Normal	4.2661	GTEX-13NZ9-2626-SM-5L3FK			SKCM(T=102,N=558)	Normal	4.149	GTEX-13JVG-0726-SM-5KM16
SKCM(T=102,N=558)	Tumor	4.3198	TCGA-EB-A6R0-01			SKCM(T=102,N=558)	Normal	3.5779	GTEX-111CU-1926-SM-5GZYZ			SKCM(T=102,N=558)	Normal	4.0019	GTEX-U8XE-0226-SM-4E3J3
SKCM(T=102,N=558)	Tumor	2.909	TCGA-EB-A4P0-01			SKCM(T=102,N=558)	Normal	4.0153	GTEX-UPK5-0726-SM-4IHL7			SKCM(T=102,N=558)	Normal	4.5136	GTEX-13OW7-0426-SM-5K7VK
SKCM(T=102,N=558)	Tumor	2.4857	TCGA-BF-A3DL-01			SKCM(T=102,N=558)	Normal	2.9984	GTEX-11UD1-0126-SM-5PNYG			SKCM(T=102,N=558)	Normal	4.1772	GTEX-13113-1926-SM-5LZWG
SKCM(T=102,N=558)	Tumor	2.824	TCGA-EB-A3HV-01			SKCM(T=102,N=558)	Normal	4.281	GTEX-145ME-1826-SM-5SI9G			SKCM(T=102,N=558)	Normal	3.1523	GTEX-ZPCL-1126-SM-4WWFE
SKCM(T=102,N=558)	Tumor	3.2692	TCGA-EB-A299-01			SKCM(T=102,N=558)	Normal	4.0233	GTEX-14BMU-1226-SM-5S2OR			SKCM(T=102,N=558)	Normal	3.7571	GTEX-ZDYS-2426-SM-4WKGI
SKCM(T=102,N=558)	Tumor	4.0935	TCGA-GN-A26C-01			SKCM(T=102,N=558)	Normal	4.6306	GTEX-11P81-2326-SM-59875			SKCM(T=102,N=558)	Normal	4.2434	GTEX-146FH-0126-SM-5QGPP
SKCM(T=102,N=558)	Tumor	2.2573	TCGA-XV-AAZV-01			SKCM(T=102,N=558)	Normal	3.9765	GTEX-WHSB-1326-SM-3LK6W			SKCM(T=102,N=558)	Normal	4.6317	GTEX-ZTSS-1926-SM-57WEW
SKCM(T=102,N=558)	Tumor	1.9111	TCGA-BF-A5ES-01			SKCM(T=102,N=558)	Normal	3.9663	GTEX-14A5H-0426-SM-5QGQF			SKCM(T=102,N=558)	Normal	4.4101	GTEX-ZT9W-2426-SM-57WFJ
SKCM(T=102,N=558)	Tumor	3.8095	TCGA-EB-A3XF-01			SKCM(T=102,N=558)	Normal	3.9496	GTEX-XXEK-2226-SM-4BRUM			SKCM(T=102,N=558)	Normal	3.9223	GTEX-Q2AI-1326-SM-2S1PL
SKCM(T=102,N=558)	Tumor	-0.1031	TCGA-ER-A2NB-01			SKCM(T=102,N=558)	Normal	4.5934	GTEX-ZAB5-1826-SM-5HL7C			SKCM(T=102,N=558)	Normal	4.0171	GTEX-ZVE1-0726-SM-51MRN
SKCM(T=102,N=558)	Tumor	2.0776	TCGA-EB-A3XE-01			SKCM(T=102,N=558)	Normal	4.4556	GTEX-11ZTT-2426-SM-5EQLS			SKCM(T=102,N=558)	Normal	4.0584	GTEX-11DZ1-0126-SM-5985Q
SKCM(T=102,N=558)	Tumor	1.683	TCGA-ER-A194-01			SKCM(T=102,N=558)	Normal	3.7539	GTEX-11ZTS-0126-SM-5EQ6M			SKCM(T=102,N=558)	Normal	3.5584	GTEX-ZYWO-2226-SM-5GZXR
SKCM(T=102,N=558)	Tumor	2.4623	TCGA-EB-A85I-01			SKCM(T=102,N=558)	Normal	4.1466	GTEX-12C56-1726-SM-5EQ61			SKCM(T=102,N=558)	Normal	3.83	GTEX-111VG-1626-SM-5EGIO
SKCM(T=102,N=558)	Normal	4.0627	GTEX-ZF29-0926-SM-4WKFZ			SKCM(T=102,N=558)	Normal	4.4913	GTEX-139UW-0326-SM-5J1ML			SKCM(T=102,N=558)	Normal	4.4887	GTEX-RM2N-1426-SM-2TF4H
SKCM(T=102,N=558)	Normal	4.4397	GTEX-TSE9-0126-SM-3DB83			SKCM(T=102,N=558)	Normal	4.0046	GTEX-XBEW-0626-SM-4QASP			SKCM(T=102,N=558)	Normal	3.5947	GTEX-11DXZ-2026-SM-5987S
SKCM(T=102,N=558)	Normal	4.4277	GTEX-12WSK-2326-SM-5GCOH			SKCM(T=102,N=558)	Normal	4.0488	GTEX-14A6H-0126-SM-5QGPK			SKCM(T=102,N=558)	Normal	3.864	GTEX-WOFL-0126-SM-3MJG2
SKCM(T=102,N=558)	Normal	3.6324	GTEX-P4PQ-0126-SM-2S1NM			SKCM(T=102,N=558)	Normal	4.4074	GTEX-ZYFC-0426-SM-5GICQ			SKCM(T=102,N=558)	Normal	4.2833	GTEX-RN64-0126-SM-2TC68
SKCM(T=102,N=558)	Normal	3.5212	GTEX-132NY-0326-SM-5IJBL			SKCM(T=102,N=558)	Normal	4.4739	GTEX-RWSA-0126-SM-2XCBB			SKCM(T=102,N=558)	Normal	4.1628	GTEX-PLZ4-0126-SM-2S1OG
SKCM(T=102,N=558)	Normal	4.1962	GTEX-11O72-0626-SM-5PNYE			SKCM(T=102,N=558)	Normal	3.5682	GTEX-XUZC-1726-SM-4BRWS			SKCM(T=102,N=558)	Normal	4.6282	GTEX-13VXT-1926-SM-5K7UO
SKCM(T=102,N=558)	Normal	3.7475	GTEX-Y8LW-1526-SM-5IFHL			SKCM(T=102,N=558)	Normal	3.7105	GTEX-ZLFU-1826-SM-4WWBV			SKCM(T=102,N=558)	Normal	3.9487	GTEX-ZVT4-0126-SM-51MS1
SKCM(T=102,N=558)	Normal	4.0739	GTEX-13PVR-2326-SM-5QGR1			SKCM(T=102,N=558)	Normal	4.3256	GTEX-12WSL-2026-SM-5GCML			SKCM(T=102,N=558)	Normal	3.0978	GTEX-1399S-0126-SM-5IJCF
SKCM(T=102,N=558)	Normal	4.2803	GTEX-T6MO-1626-SM-32QOM			SKCM(T=102,N=558)	Normal	4.4816	GTEX-11OF3-2626-SM-5GU7F			SKCM(T=102,N=558)	Normal	4.4013	GTEX-PSDG-0226-SM-33HC1
SKCM(T=102,N=558)	Normal	4.2088	GTEX-ZVZP-2426-SM-59HKJ			SKCM(T=102,N=558)	Normal	3.97	GTEX-YF7O-1526-SM-5IFI6			SKCM(T=102,N=558)	Normal	4.1441	GTEX-13FTX-1526-SM-5K7VJ
SKCM(T=102,N=558)	Normal	4.3986	GTEX-U4B1-1826-SM-4DXSU			SKCM(T=102,N=558)	Normal	3.9506	GTEX-13VXU-0126-SM-5SI9F			SKCM(T=102,N=558)	Normal	3.7603	GTEX-WXYG-2026-SM-4E3IY
SKCM(T=102,N=558)	Normal	3.2766	GTEX-ZVZO-0126-SM-5A5L9			SKCM(T=102,N=558)	Normal	3.8431	GTEX-X3Y1-2026-SM-3P5YM			SKCM(T=102,N=558)	Normal	4.235	GTEX-13PVQ-0626-SM-5LU47
SKCM(T=102,N=558)	Normal	3.991	GTEX-13FTY-2126-SM-5IFFB			SKCM(T=102,N=558)	Normal	3.6113	GTEX-TMKS-0126-SM-3DB7S			SKCM(T=102,N=558)	Normal	3.9393	GTEX-SUCS-1926-SM-32PM3
SKCM(T=102,N=558)	Normal	4.3958	GTEX-OXRP-0126-SM-3NB32			SKCM(T=102,N=558)	Normal	4.251	GTEX-12WSA-0226-SM-5BC5V			SKCM(T=102,N=558)	Normal	4.2578	GTEX-11WQK-1026-SM-5EQLX
SKCM(T=102,N=558)	Normal	3.7443	GTEX-13FH7-1126-SM-5K7UG			SKCM(T=102,N=558)	Normal	3.6635	GTEX-117YW-2626-SM-5GZZH			SKCM(T=102,N=558)	Normal	4.4647	GTEX-Y5V5-0126-SM-5S2NW
SKCM(T=102,N=558)	Normal	4.3737	GTEX-147GR-0526-SM-5S2MY			SKCM(T=102,N=558)	Normal	4.2965	GTEX-13VXU-0626-SM-5L3F9			SKCM(T=102,N=558)	Normal	3.3506	GTEX-WH7G-2026-SM-3NMBL
SKCM(T=102,N=558)	Normal	4.0549	GTEX-Y8LW-1826-SM-5S2MV			SKCM(T=102,N=558)	Normal	3.9534	GTEX-14E6C-0126-SM-5RQIP			SKCM(T=102,N=558)	Normal	4.3399	GTEX-11VI4-1726-SM-5CVLH
SKCM(T=102,N=558)	Normal	3.5022	GTEX-X8HC-0126-SM-4E3JW			SKCM(T=102,N=558)	Normal	4.0619	GTEX-XBED-1926-SM-47JYP			SKCM(T=102,N=558)	Normal	3.7888	GTEX-T6MN-0126-SM-32PLP
SKCM(T=102,N=558)	Normal	4.1724	GTEX-YEC4-2126-SM-5IFJH			SKCM(T=102,N=558)	Normal	4.0807	GTEX-ZVT3-0126-SM-5GU6I			SKCM(T=102,N=558)	Normal	4.0943	GTEX-12WSK-2126-SM-5CVNC
SKCM(T=102,N=558)	Normal	3.9524	GTEX-SIU8-0126-SM-2XCDT			SKCM(T=102,N=558)	Normal	3.8905	GTEX-ZE7O-0126-SM-57WC1			SKCM(T=102,N=558)	Normal	4.4095	GTEX-148VJ-0626-SM-5LUAW
SKCM(T=102,N=558)	Normal	3.8818	GTEX-Y111-0126-SM-4SOIV			SKCM(T=102,N=558)	Normal	3.1112	GTEX-TMZS-0126-SM-3DB9Q			SKCM(T=102,N=558)	Normal	4.1294	GTEX-131YS-0126-SM-5KM1M
SKCM(T=102,N=558)	Normal	4.3534	GTEX-YJ8O-2526-SM-5HL85			SKCM(T=102,N=558)	Normal	3.9737	GTEX-PLZ6-1426-SM-5S2TR			SKCM(T=102,N=558)	Normal	3.8847	GTEX-1211K-1526-SM-5FQU4
SKCM(T=102,N=558)	Normal	3.3464	GTEX-WI4N-1026-SM-3LK7N			SKCM(T=102,N=558)	Normal	4.3903	GTEX-146FR-1326-SM-5SIAJ			SKCM(T=102,N=558)	Normal	3.834	GTEX-X5EB-2226-SM-46MW4
SKCM(T=102,N=558)	Normal	4.3992	GTEX-QLQ7-1626-SM-2S1R8			SKCM(T=102,N=558)	Normal	3.3264	GTEX-P4QR-0326-SM-5SI8P			SKCM(T=102,N=558)	Normal	3.9175	GTEX-11DXZ-2326-SM-5EGGV
SKCM(T=102,N=558)	Normal	4.0627	GTEX-11GSO-2426-SM-5A5LY			SKCM(T=102,N=558)	Normal	3.4817	GTEX-YEC4-1826-SM-4W1YP			SKCM(T=102,N=558)	Normal	4.2766	GTEX-ZAK1-0126-SM-5IJD3
SKCM(T=102,N=558)	Normal	3.6894	GTEX-OXRL-0126-SM-2YUMP			SKCM(T=102,N=558)	Normal	4.4868	GTEX-11EQ9-2426-SM-5HL5T			SKCM(T=102,N=558)	Normal	4.2412	GTEX-VUSG-2326-SM-4KL1U
SKCM(T=102,N=558)	Normal	4.6468	GTEX-12WSB-0126-SM-59HJN			SKCM(T=102,N=558)	Normal	4.1094	GTEX-QCQG-1726-SM-3GIJ9			SKCM(T=102,N=558)	Normal	4.2929	GTEX-13X6I-0626-SM-5QGP9
SKCM(T=102,N=558)	Normal	3.4596	GTEX-Y5V6-2426-SM-4VDSB			SKCM(T=102,N=558)	Normal	4.208	GTEX-RVPU-2226-SM-2XCAQ			SKCM(T=102,N=558)	Normal	4.5173	GTEX-13SLW-0626-SM-5Q5ER
SKCM(T=102,N=558)	Normal	4.1094	GTEX-13OVH-0126-SM-5MR4B			SKCM(T=102,N=558)	Normal	4.4067	GTEX-139T8-0626-SM-5KLZX			SKCM(T=102,N=558)	Normal	4.579	GTEX-ZZ64-1726-SM-5GZYB
SKCM(T=102,N=558)	Normal	3.8228	GTEX-XUW1-0926-SM-4BONX			SKCM(T=102,N=558)	Normal	4.6645	GTEX-ZVE2-2826-SM-5GU51			SKCM(T=102,N=558)	Normal	4.1178	GTEX-ZTSS-1426-SM-5985P
SKCM(T=102,N=558)	Normal	4.4874	GTEX-14C5O-0126-SM-5SI6N			SKCM(T=102,N=558)	Normal	3.8571	GTEX-ZT9W-1126-SM-57WDR			SKCM(T=102,N=558)	Normal	4.0348	GTEX-R3RS-0126-SM-3GIJL
SKCM(T=102,N=558)	Normal	3.3307	GTEX-145MG-1526-SM-5Q5EM			SKCM(T=102,N=558)	Normal	3.868	GTEX-Y8E4-2026-SM-5IFJB			SKCM(T=102,N=558)	Normal	4.0722	GTEX-12126-0826-SM-5FQTZ
SKCM(T=102,N=558)	Normal	4.3009	GTEX-WYVS-2126-SM-3NMA3			SKCM(T=102,N=558)	Normal	4.5386	GTEX-139TT-0126-SM-5K7Y5			SKCM(T=102,N=558)	Normal	4.0251	GTEX-XQ8I-0426-SM-4BOPO
SKCM(T=102,N=558)	Normal	3.7464	GTEX-14753-0426-SM-5NQAM			SKCM(T=102,N=558)	Normal	4.0653	GTEX-13NYB-0126-SM-5J1MD			SKCM(T=102,N=558)	Normal	4.0436	GTEX-PLZ6-1426-SM-2S1OQ
SKCM(T=102,N=558)	Normal	4.3256	GTEX-13OW8-1026-SM-5J1NQ			SKCM(T=102,N=558)	Normal	3.9663	GTEX-144FL-0626-SM-5LU43			SKCM(T=102,N=558)	Normal	4.067	GTEX-13OW7-0126-SM-5MR3B
SKCM(T=102,N=558)	Normal	4.2235	GTEX-113JC-2326-SM-5EQ4E			SKCM(T=102,N=558)	Normal	4.1359	GTEX-12WS9-0126-SM-5EGL7			SKCM(T=102,N=558)	Normal	3.83	GTEX-ZDXO-3126-SM-5IJDF
SKCM(T=102,N=558)	Normal	4.7555	GTEX-Z9EW-1626-SM-5CVMN			SKCM(T=102,N=558)	Normal	4.4344	GTEX-12ZZY-0226-SM-5LZVE			SKCM(T=102,N=558)	Normal	4.1128	GTEX-12WSJ-1826-SM-5GCNY
SKCM(T=102,N=558)	Normal	4.3534	GTEX-13X6K-0626-SM-5LU5D			SKCM(T=102,N=558)	Normal	4.1684	GTEX-NFK9-0226-SM-2HMKQ			SKCM(T=102,N=558)	Normal	4.1194	GTEX-13OW8-1326-SM-5J1OW
SKCM(T=102,N=558)	Normal	3.5839	GTEX-ZPU1-1126-SM-4YCF3			SKCM(T=102,N=558)	Normal	3.773	GTEX-PWCY-1826-SM-5SI7U			SKCM(T=102,N=558)	Normal	4.0662	GTEX-U3ZM-1526-SM-3DB9D
SKCM(T=102,N=558)	Normal	4.1474	GTEX-QLQW-1126-SM-2S1Q8			SKCM(T=102,N=558)	Normal	3.83	GTEX-139TU-0726-SM-5L3EK			SKCM(T=102,N=558)	Normal	3.8798	GTEX-UJHI-1526-SM-3DB99
SKCM(T=102,N=558)	Normal	3.831	GTEX-Y111-0626-SM-4SOIT			SKCM(T=102,N=558)	Normal	3.8827	GTEX-139D8-0226-SM-5KLZO			SKCM(T=102,N=558)	Normal	4.3364	GTEX-ZV68-0126-SM-59HKS
SKCM(T=102,N=558)	Normal	4.1178	GTEX-13OVJ-0126-SM-5KM36			SKCM(T=102,N=558)	Normal	3.8471	GTEX-13FXS-0226-SM-5IJCK			SKCM(T=102,N=558)	Normal	4.1061	GTEX-X62O-0126-SM-4E3JN
SKCM(T=102,N=558)	Normal	3.9365	GTEX-PWCY-1826-SM-2S1OK			SKCM(T=102,N=558)	Normal	4.0645	GTEX-ZE7O-2726-SM-51MT5			SKCM(T=102,N=558)	Normal	3.6872	GTEX-146FQ-0126-SM-5NQA9
SKCM(T=102,N=558)	Normal	3.5111	GTEX-13OVI-2726-SM-5KM56			SKCM(T=102,N=558)	Normal	4.2165	GTEX-13113-1626-SM-5EQ4I			SKCM(T=102,N=558)	Normal	4.3278	GTEX-13N1W-0126-SM-5K7VT
SKCM(T=102,N=558)	Normal	4.2266	GTEX-12696-0126-SM-5EQ4L			SKCM(T=102,N=558)	Normal	4.2855	GTEX-12WSD-0626-SM-5GCMW			SKCM(T=102,N=558)	Normal	4.2973	GTEX-13D11-0926-SM-5J2NC
SKCM(T=102,N=558)	Normal	3.6054	GTEX-132AR-0326-SM-5KM2C			SKCM(T=102,N=558)	Normal	3.836	GTEX-ZDYS-2026-SM-5HL5L			SKCM(T=102,N=558)	Normal	4.1859	GTEX-13112-0126-SM-5P9IU
SKCM(T=102,N=558)	Normal	4.5398	GTEX-13OW5-0126-SM-5MR3A			SKCM(T=102,N=558)	Normal	4.096	GTEX-V1D1-2026-SM-3GAF4			SKCM(T=102,N=558)	Normal	4.2158	GTEX-11XUK-2026-SM-5EQLF
SKCM(T=102,N=558)	Normal	4.245	GTEX-13G51-1826-SM-5KLZH			SKCM(T=102,N=558)	Normal	4.1852	GTEX-11DXW-0826-SM-5H118			SKCM(T=102,N=558)	Normal	4.6651	GTEX-WYVS-1626-SM-3NM9R
SKCM(T=102,N=558)	Normal	4.1011	GTEX-131YS-2826-SM-5EQ47			SKCM(T=102,N=558)	Normal	4.3463	GTEX-N7MS-0225-SM-4E3HO			SKCM(T=102,N=558)	Normal	4.2009	GTEX-11DXX-2426-SM-5GZZW
SKCM(T=102,N=558)	Normal	4.3133	GTEX-11TUW-0626-SM-5LU9M			SKCM(T=102,N=558)	Normal	3.8788	GTEX-144GN-2326-SM-5LU4F			SKCM(T=102,N=558)	Normal	4.7656	GTEX-12WSC-0126-SM-5EQ4P
SKCM(T=102,N=558)	Normal	3.5009	GTEX-XUJ4-1826-SM-4BOOU			SKCM(T=102,N=558)	Normal	4.0824	GTEX-11ZVC-2526-SM-5FQTE			SKCM(T=102,N=558)	Normal	3.5374	GTEX-O5YT-0126-SM-48TBW
SKCM(T=102,N=558)	Normal	3.335	GTEX-12WSJ-1126-SM-5LZVJ			SKCM(T=102,N=558)	Normal	4.3463	GTEX-13PVR-0426-SM-5RQK2			SKCM(T=102,N=558)	Normal	3.9185	GTEX-13OVG-1626-SM-5J1NF
SKCM(T=102,N=558)	Normal	4.4074	GTEX-13SLX-0526-SM-5S2ON			SKCM(T=102,N=558)	Normal	3.9431	GTEX-X585-0226-SM-4QAS2			SKCM(T=102,N=558)	Normal	3.7971	GTEX-OIZG-0726-SM-33HBL
SKCM(T=102,N=558)	Normal	3.9956	GTEX-13X6J-0126-SM-5QGOU			SKCM(T=102,N=558)	Normal	3.38	GTEX-ZYW4-0626-SM-59HJR			SKCM(T=102,N=558)	Normal	3.8157	GTEX-11ILO-0626-SM-5A5LO
SKCM(T=102,N=558)	Normal	4.3604	GTEX-13O1R-0126-SM-5L3EH			SKCM(T=102,N=558)	Normal	4.3499	GTEX-ZWKS-0626-SM-5GIDV			SKCM(T=102,N=558)	Normal	4.2518	GTEX-12ZZX-2426-SM-5GCOE
SKCM(T=102,N=558)	Normal	3.8818	GTEX-139YR-1026-SM-5LZYN			SKCM(T=102,N=558)	Normal	4.3653	GTEX-14753-0726-SM-5QGQO			SKCM(T=102,N=558)	Normal	4.0532	GTEX-ZY6K-1826-SM-5GZXK
SKCM(T=102,N=558)	Normal	4.6554	GTEX-11EQ8-0126-SM-5EQ54			SKCM(T=102,N=558)	Normal	4.0541	GTEX-WFON-1926-SM-3LK7L			SKCM(T=102,N=558)	Normal	4.4523	GTEX-13YAN-0326-SM-5O9DF
SKCM(T=102,N=558)	Normal	4.0313	GTEX-1212Z-0126-SM-59HK4			SKCM(T=102,N=558)	Normal	4.1612	GTEX-12584-0126-SM-5EGKQ			SKCM(T=102,N=558)	Normal	3.7992	GTEX-Y3I4-2126-SM-4TT7C
SKCM(T=102,N=558)	Normal	4.182	GTEX-ZZ64-1026-SM-5GZXG			SKCM(T=102,N=558)	Normal	3.8431	GTEX-PLZ4-0126-SM-5SI8O			SKCM(T=102,N=558)	Normal	3.8611	GTEX-11OF3-0126-SM-5PNYF
SKCM(T=102,N=558)	Normal	4.497	GTEX-13X6J-0626-SM-5LU5F			SKCM(T=102,N=558)	Normal	4.2973	GTEX-1192X-2726-SM-5N9DN			SKCM(T=102,N=558)	Normal	4.4556	GTEX-ZYT6-0226-SM-5NQ6T
SKCM(T=102,N=558)	Normal	4.1628	GTEX-ZVTK-0226-SM-51MRG			SKCM(T=102,N=558)	Normal	3.5086	GTEX-Y114-2426-SM-4TT8A			SKCM(T=102,N=558)	Normal	4.1978	GTEX-WHWD-1826-SM-3LK6I
SKCM(T=102,N=558)	Normal	4.0153	GTEX-WYJK-0526-SM-3NM8Z			SKCM(T=102,N=558)	Normal	4.5583	GTEX-131XF-2126-SM-5DUWS			SKCM(T=102,N=558)	Normal	3.8208	GTEX-11ILO-0126-SM-5A5LN
SKCM(T=102,N=558)	Normal	4.3342	GTEX-ZVT2-0126-SM-5GIDQ			SKCM(T=102,N=558)	Normal	4.3399	GTEX-12ZZZ-0626-SM-5DUXI			SKCM(T=102,N=558)	Normal	3.8147	GTEX-ZE9C-2726-SM-57WB5
SKCM(T=102,N=558)	Normal	4.1531	GTEX-WXYG-2326-SM-4E3I6			SKCM(T=102,N=558)	Normal	4.0833	GTEX-11DXW-0226-SM-5H122			SKCM(T=102,N=558)	Normal	3.5486	GTEX-WFG7-2026-SM-5SI7P
SKCM(T=102,N=558)	Normal	4.3744	GTEX-ZQG8-1626-SM-5HL6H			SKCM(T=102,N=558)	Normal	4.5311	GTEX-13OW6-2726-SM-5J2OE			SKCM(T=102,N=558)	Normal	4.327	GTEX-WYJK-0126-SM-3NMAB
SKCM(T=102,N=558)	Normal	3.9213	GTEX-ZTTD-2826-SM-4YCFA			SKCM(T=102,N=558)	Normal	4.1867	GTEX-YJ89-0126-SM-4TT3X			SKCM(T=102,N=558)	Normal	4.001	GTEX-XQ3S-1526-SM-4BOOC
SKCM(T=102,N=558)	Normal	4.0445	GTEX-QV44-1926-SM-2S1RF			SKCM(T=102,N=558)	Normal	4.1875	GTEX-111YS-1526-SM-5GZYW			SKCM(T=102,N=558)	Normal	3.9865	GTEX-13PDP-0126-SM-5L3HD
SKCM(T=102,N=558)	Normal	4.1343	GTEX-13NZ8-0826-SM-5MR3I			SKCM(T=102,N=558)	Normal	4.5261	GTEX-13N2G-2626-SM-5J1OT			SKCM(T=102,N=558)	Normal	3.9847	GTEX-YB5K-2126-SM-4WWDJ
SKCM(T=102,N=558)	Normal	4.041	GTEX-WQUQ-0426-SM-3MJFU			SKCM(T=102,N=558)	Normal	4.4169	GTEX-11NSD-2226-SM-5986V			SKCM(T=102,N=558)	Normal	3.0893	GTEX-11TT1-1826-SM-5EQLV
SKCM(T=102,N=558)	Normal	3.837	GTEX-RUSQ-1526-SM-2TF62			SKCM(T=102,N=558)	Normal	4.3484	GTEX-1212Z-2526-SM-5EGKP			SKCM(T=102,N=558)	Normal	4.6508	GTEX-ZVE2-0226-SM-59HJB
SKCM(T=102,N=558)	Normal	4.2173	GTEX-14C38-0726-SM-5SI6M			SKCM(T=102,N=558)	Normal	4.6171	GTEX-13IVO-0726-SM-5LZYV			SKCM(T=102,N=558)	Normal	4.01	GTEX-ZLV1-1526-SM-4WWBC
SKCM(T=102,N=558)	Normal	4.018	GTEX-ZDTS-0126-SM-4WAY5			SKCM(T=102,N=558)	Normal	4.2017	GTEX-OHPM-0126-SM-2YUN9			SKCM(T=102,N=558)	Normal	4.7809	GTEX-1314G-1326-SM-5BC6E
SKCM(T=102,N=558)	Normal	3.421	GTEX-Y9LG-1126-SM-4VBQ7			SKCM(T=102,N=558)	Normal	3.7464	GTEX-YFC4-0126-SM-5CVLY			SKCM(T=102,N=558)	Normal	4.1111	GTEX-11H98-0126-SM-5EGHG
SKCM(T=102,N=558)	Normal	3.8964	GTEX-X638-0126-SM-47JZ8			SKCM(T=102,N=558)	Normal	3.867	GTEX-ZYFD-0126-SM-5GIDL			SKCM(T=102,N=558)	Normal	3.9719	GTEX-T2IS-0126-SM-4DM6O
SKCM(T=102,N=558)	Normal	3.8837	GTEX-13N11-2326-SM-5IJBF			SKCM(T=102,N=558)	Normal	3.8521	GTEX-11EMC-2926-SM-5EQ4F			SKCM(T=102,N=558)	Normal	4.3965	GTEX-12KS4-2126-SM-5FQUT
SKCM(T=102,N=558)	Normal	4.3249	GTEX-147F3-0526-SM-5SI98			SKCM(T=102,N=558)	Normal	3.8075	GTEX-131XH-0126-SM-5LZUY			SKCM(T=102,N=558)	Normal	4.1392	GTEX-ZYT6-2326-SM-5GZY3
SKCM(T=102,N=558)	Normal	4.2609	GTEX-11EQ9-1626-SM-5PNY8			SKCM(T=102,N=558)	Normal	4.166	GTEX-131XW-0626-SM-5PNVD			SKCM(T=102,N=558)	Normal	3.6486	GTEX-13OVJ-0826-SM-5J1OK
SKCM(T=102,N=558)	Normal	4.3765	GTEX-T5JC-0426-SM-32PLO			SKCM(T=102,N=558)	Normal	3.868	GTEX-YEC3-1326-SM-4WWEL			SKCM(T=102,N=558)	Normal	3.8798	GTEX-12WSH-1526-SM-5BC5W
SKCM(T=102,N=558)	Normal	3.7571	GTEX-X4EP-0126-SM-3P5YV			SKCM(T=102,N=558)	Normal	3.9185	GTEX-ZU9S-0226-SM-5E441			SKCM(T=102,N=558)	Normal	4.0392	GTEX-WY7C-2326-SM-3NB2U
SKCM(T=102,N=558)	Normal	3.7356	GTEX-ZVZP-1226-SM-5GID7			SKCM(T=102,N=558)	Normal	4.5318	GTEX-13VXT-0126-SM-5LU4I			SKCM(T=102,N=558)	Normal	3.3925	GTEX-ZVP2-0326-SM-57WBP
SKCM(T=102,N=558)	Normal	4.0892	GTEX-XBED-2226-SM-47JYQ			SKCM(T=102,N=558)	Normal	4.0722	GTEX-11TUW-2726-SM-5EQLC			SKCM(T=102,N=558)	Normal	4.0515	GTEX-XUYS-0126-SM-47JWZ
SKCM(T=102,N=558)	Normal	4.166	GTEX-ZEX8-2426-SM-4WKG4			SKCM(T=102,N=558)	Normal	3.8915	GTEX-11TTK-0126-SM-5987B			SKCM(T=102,N=558)	Normal	4.3177	GTEX-145MI-0526-SM-5O9A8
SKCM(T=102,N=558)	Normal	4.6955	GTEX-13FLV-0126-SM-5K7WT			SKCM(T=102,N=558)	Normal	4.3618	GTEX-ZAB4-2126-SM-5HL8U			SKCM(T=102,N=558)	Normal	4.5199	GTEX-12KS4-0326-SM-5EQ41
SKCM(T=102,N=558)	Normal	4.9649	GTEX-ZVZQ-0326-SM-59HLL			SKCM(T=102,N=558)	Normal	4.0901	GTEX-QDVN-2026-SM-3GAEP			SKCM(T=102,N=558)	Normal	4.3737	GTEX-SJXC-0126-SM-2XCFF
SKCM(T=102,N=558)	Normal	4.0419	GTEX-RU72-0926-SM-2TF6B			SKCM(T=102,N=558)	Normal	4.3449	GTEX-1269C-2526-SM-5EGJ3			SKCM(T=102,N=558)	Normal	4.3999	GTEX-131XF-2626-SM-5EQ6K
SKCM(T=102,N=558)	Normal	4.3075	GTEX-OXRK-0226-SM-2YUN1			SKCM(T=102,N=558)	Normal	3.9829	GTEX-ZYW4-0126-SM-5E44A			SKCM(T=102,N=558)	Normal	4.0816	GTEX-XPVG-2626-SM-4B669
SKCM(T=102,N=558)	Normal	3.4958	GTEX-U8XE-0326-SM-3DB8P			SKCM(T=102,N=558)	Normal	4.0532	GTEX-PWO3-1526-SM-48TCM			SKCM(T=102,N=558)	Normal	4.1962	GTEX-139TT-2126-SM-5LZWC
SKCM(T=102,N=558)	Normal	4.359	GTEX-OXRN-0126-SM-48TDM			SKCM(T=102,N=558)	Normal	4.2173	GTEX-QESD-1426-SM-2S1R9			SKCM(T=102,N=558)	Normal	3.3605	GTEX-Y3I4-1726-SM-4TT89
SKCM(T=102,N=558)	Normal	3.991	GTEX-ZGAY-0526-SM-4WWBB			SKCM(T=102,N=558)	Normal	4.1294	GTEX-14AS3-1526-SM-5Q5ED			SKCM(T=102,N=558)	Normal	4.1061	GTEX-13OVH-0526-SM-5L3E6
SKCM(T=102,N=558)	Normal	4.1595	GTEX-13CF3-2426-SM-5IFGX			SKCM(T=102,N=558)	Normal	4.1053	GTEX-139T8-0126-SM-5K7XZ			SKCM(T=102,N=558)	Normal	4.1539	GTEX-12WSN-1426-SM-5GCO6
SKCM(T=102,N=558)	Normal	4.4423	GTEX-13S7M-0126-SM-5SI6A			SKCM(T=102,N=558)	Normal	3.0323	GTEX-Y5V6-2326-SM-4VDSA			SKCM(T=102,N=558)	Normal	4.7893	GTEX-ZXG5-0126-SM-5GIEU
SKCM(T=102,N=558)	Normal	3.5086	GTEX-ZYFG-2326-SM-5E44B			SKCM(T=102,N=558)	Normal	3.29	GTEX-11DYG-1526-SM-5A5JS			SKCM(T=102,N=558)	Normal	4.0064	GTEX-ZYFD-0626-SM-5E44E
SKCM(T=102,N=558)	Normal	4.1748	GTEX-11DXY-0126-SM-5H11Q			SKCM(T=102,N=558)	Normal	4.3484	GTEX-ZAB5-2626-SM-5KM3Y			SKCM(T=102,N=558)	Normal	3.9617	GTEX-QDT8-0126-SM-48TZ1
SKCM(T=102,N=558)	Normal	3.616	GTEX-ZY6K-1426-SM-5GZX2			SKCM(T=102,N=558)	Normal	4.1571	GTEX-VUSG-2526-SM-4KL1V			SKCM(T=102,N=558)	Normal	4.2442	GTEX-148VI-1626-SM-5SI6E
SKCM(T=102,N=558)	Normal	4.235	GTEX-12WS9-0326-SM-59HJV			SKCM(T=102,N=558)	Normal	4.1236	GTEX-P4QT-0126-SM-2I3FL			SKCM(T=102,N=558)	Normal	3.5839	GTEX-1122O-2126-SM-5EGIR
SKCM(T=102,N=558)	Normal	4.3751	GTEX-XAJ8-1426-SM-47JYM			SKCM(T=102,N=558)	Normal	3.869	GTEX-139TS-2826-SM-5J1OO			SKCM(T=102,N=558)	Normal	3.7561	GTEX-Y5LM-1926-SM-5RQJH
SKCM(T=102,N=558)	Normal	4.2488	GTEX-UPJH-0226-SM-3GADV			SKCM(T=102,N=558)	Normal	4.3046	GTEX-R55E-0126-SM-2TC5Y			SKCM(T=102,N=558)	Normal	4.1169	GTEX-XAJ8-0826-SM-47JY6
SKCM(T=102,N=558)	Normal	3.9691	GTEX-Z93S-1626-SM-5CVMB			SKCM(T=102,N=558)	Normal	3.9746	GTEX-11VI4-1126-SM-5EQMD			SKCM(T=102,N=558)	Normal	3.7248	GTEX-13U4I-2226-SM-5LU5H
SKCM(T=102,N=558)	Normal	4.2766	GTEX-YJ8A-0426-SM-5IFID			SKCM(T=102,N=558)	Normal	4.0541	GTEX-X4EO-0326-SM-3P5YO			SKCM(T=102,N=558)	Normal	3.9543	GTEX-S7PM-0126-SM-4AD6S
SKCM(T=102,N=558)	Normal	4.4739	GTEX-13X6I-1826-SM-5SIAO			SKCM(T=102,N=558)	Normal	3.8249	GTEX-13111-1826-SM-5GCP1			SKCM(T=102,N=558)	Normal	3.9012	GTEX-1128S-2326-SM-5GZZY
SKCM(T=102,N=558)	Normal	4.4667	GTEX-11EI6-2826-SM-5H11D			SKCM(T=102,N=558)	Normal	3.8269	GTEX-145MN-1526-SM-5SI9T			SKCM(T=102,N=558)	Normal	4.3111	GTEX-13NYS-0626-SM-5L3F1
SKCM(T=102,N=558)	Normal	4.2706	GTEX-11WQC-1826-SM-5GU59			SKCM(T=102,N=558)	Normal	3.7116	GTEX-ZU9S-1826-SM-5NQ9E			SKCM(T=102,N=558)	Normal	3.97	GTEX-13G51-2526-SM-5LZYK
SKCM(T=102,N=558)	Normal	4.3198	GTEX-R55F-0126-SM-48FCK			SKCM(T=102,N=558)	Normal	3.6691	GTEX-YFCO-1226-SM-5LUAT			SKCM(T=102,N=558)	Normal	4.4634	GTEX-13112-2826-SM-5DUWH
SKCM(T=102,N=558)	Normal	4.0532	GTEX-YFC4-0126-101855-SM-5CVLZ			SKCM(T=102,N=558)	Normal	4.5205	GTEX-133LE-2326-SM-5K7W3			SKCM(T=102,N=558)	Normal	3.9289	GTEX-ZUA1-2626-SM-5NQ92
SKCM(T=102,N=558)	Normal	4.0722	GTEX-OIZH-0126-SM-2HMIS			SKCM(T=102,N=558)	Normal	3.4183	GTEX-X4XY-0226-SM-4E3IZ			SKCM(T=102,N=558)	Normal	4.4739	GTEX-PVOW-0126-SM-2XCFA
SKCM(T=102,N=558)	Normal	3.9552	GTEX-146FQ-2126-SM-5RQHU			SKCM(T=102,N=558)	Normal	4.5838	GTEX-ZF2S-2326-SM-4WWCE			SKCM(T=102,N=558)	Normal	3.7518	GTEX-11DXX-2126-SM-5PNYR
SKCM(T=102,N=558)	Normal	4.1069	GTEX-1399R-2726-SM-5IJBA			SKCM(T=102,N=558)	Normal	3.928	GTEX-WVJS-0126-SM-4MVOT			SKCM(T=102,N=558)	Normal	3.7496	GTEX-XQ3S-1426-SM-4BOPR
SKCM(T=102,N=558)	Normal	4.0807	GTEX-131XH-2226-SM-5DUXJ			SKCM(T=102,N=558)	Normal	4.3356	GTEX-144GO-2026-SM-5O99P			SKCM(T=102,N=558)	Normal	4.5754	GTEX-13N2G-0226-SM-5K7VF
SKCM(T=102,N=558)	Normal	3.773	GTEX-X585-2426-SM-46MW2			SKCM(T=102,N=558)	Normal	3.992	GTEX-11NUK-0126-SM-5A5L3			SKCM(T=102,N=558)	Normal	4.4719	GTEX-W5WG-1826-SM-4KL2Y
SKCM(T=102,N=558)	Normal	4.041	GTEX-WHPG-2626-SM-3NMBR			SKCM(T=102,N=558)	Normal	4.0144	GTEX-RNOR-0126-SM-2TF57			SKCM(T=102,N=558)	Normal	4.1764	GTEX-XXEK-1626-SM-4BRUZ
SKCM(T=102,N=558)	Normal	3.7888	GTEX-ZTPG-0326-SM-5O9AX			SKCM(T=102,N=558)	Normal	4.2389	GTEX-VJYA-1526-SM-3GIJV			SKCM(T=102,N=558)	Normal	3.7105	GTEX-145LT-1726-SM-5QGP3
SKCM(T=102,N=558)	Normal	3.453	GTEX-Y3IK-1626-SM-4YCF5			SKCM(T=102,N=558)	Normal	4.2616	GTEX-ZYY3-2926-SM-5GIEB			SKCM(T=102,N=558)	Normal	4.597	GTEX-ZZPT-0226-SM-5E43X
SKCM(T=102,N=558)	Normal	4.1899	GTEX-145MH-2826-SM-5RQJF			SKCM(T=102,N=558)	Normal	3.3703	TCGA-GN-A4U8-11			SKCM(T=102,N=558)	Normal	2.4492	GTEX-ZP4G-2426-SM-57WEY
SKCM(T=102,N=558)	Normal	4.6183	GTEX-SIU7-1726-SM-2XCDZ			SKCM(T=102,N=558)	Normal	4.2343	GTEX-12WSN-2326-SM-5DUVG			SKCM(T=102,N=558)	Normal	4.8525	GTEX-13PDP-0726-SM-5L3HP
SKCM(T=102,N=558)	Normal	3.6532	GTEX-ZT9X-1526-SM-5DUXD			SKCM(T=102,N=558)	Normal	4.7082	GTEX-139D8-1126-SM-5LU8W			SKCM(T=102,N=558)	Normal	3.7149	GTEX-12BJ1-0926-SM-5EQ62
SKCM(T=102,N=558)	Normal	4.1939	GTEX-PWN1-0126-SM-2I3FK			SKCM(T=102,N=558)	Normal	4.1986	GTEX-PLZ5-2026-SM-2S1O4			SKCM(T=102,N=558)	Normal	4.858	GTEX-WYBS-0626-SM-3NMAS
SKCM(T=102,N=558)	Normal	3.2189	GTEX-Y3IK-2426-SM-4WWDU			SKCM(T=102,N=558)	Normal	4.5211	GTEX-12WSL-2526-SM-5GCNJ			SKCM(T=102,N=558)	Normal	4.4142	GTEX-13JUV-2026-SM-5K7UA
SKCM(T=102,N=558)	Normal	4.1285	GTEX-OXRO-0126-SM-2YUN4			SKCM(T=102,N=558)	Normal	4.3834	GTEX-13FHO-0426-SM-5L3F5			SKCM(T=102,N=558)	Normal	4.0313	GTEX-1313W-0126-SM-5LZUN
