# Supplementary material for: Prognostic and therapeutic roles of SETD2 in cutaneous melanoma
Source: Aging (Albany NY). 2024 Jun 5;16(11):9692–708. doi: 10.18632/aging.205894 (PMC11210245; doi:10.18632/aging.205894)
Supplement: Supplementary Table 2 [file aging-16-205894-s003.xlsx]

## Sheet: Supplementary Table2
Supplementary Table 2. The clinical data of TCGA-SKCM samples with SETD2 exprssion levels.
Overall survival	Dead status	ENSG00000181555 (SETD2)		Overall survival	Dead status	ENSG00000181555 (SETD2)		Overall survival	Dead status	ENSG00000181555 (SETD2)		Overall survival	Dead status	ENSG00000181555 (SETD2)
685	0	3.7389		787	1	2.7742		931	0	3.7518		2889	1	3.9929
425	1	3.8105		347	1	4.0207		831	0	3.945		472	1	2.4934
843	1	3.6532		3151	0	3.186		6699	0	2.4831		6873	1	3.492
907	1	3.0995		2367	0	4.7825		2184	1	3.7603		1658	0	4.1318
1103	1	2.0638		1378	0	4.0807		746	1	3.6405		454	1	3.7846
470	1	3.506		403	0	1.683		1618	1	4.1684		1319	0	4.2419
262	0	3.3032		1814	0	3.9194		1156	0	3.2112		1321	1	2.8178
422	1	3.5449		2829	1	4.0242		1794	0	1.0573		4533	0	3.3759
7563	0	3.8259		2421	1	3.4358		1280	1	4.402		3082	0	4.0884
1093	1	2.7227		874	1	3.4687		264	1	3.0927		2785	0	2.8341
1505	0	3.5608		651	0	3.4868		2912	0	3.1507		531	0	3.5779
3733	0	3.6042		1663	0	4.0662		6164	1	4.4169		1496	0	4.585
5424	0	3.9242		1000	0	2.9338		3453	1	2.874		382	0	3.0533
3379	1	3.6266		1487	0	3.2647		988	1	3.3773		1506	1	4.6101
5177	0	2.8701		392	0	3.3897		1524	1	2.8502		504	1	3.3047
5118	1	3.9626		505	0	3.1129		5299	0	3.1228		412	1	3.0876
1729	0	4.4588		614	0	3.4687		1035	0	3.3759		2193	0	1.2023
327	0	1.412		3266	1	4.1595		3976	0	3.0376		6138	0	3.4791
718	0	3.8471		545	1	3.1475		3826	0	2.2901		802	1	3.8002
3808	0	3.1669		774	0	3.8095		282	1	2.7572		777	0	3.6793
1409	0	3.5287		710	1	1.8683		1365	0	2.9186		3080	0	3.7432
1525	1	3.3407		961	1	3.0376		5286	0	3.623		4088	0	4.6218
1716	0	3.8136		2454	1	4.0636		591	0	2.93		3424	1	4.5154
81	0	3.5633		1766	1	3.4945		411	0	3.0757		1562	0	3.6148
1486	1	3.5572		2076	0	2.5948		394	1	4.0037		824	1	3.0825
270	1	4.2943		440	0	2.2051		804	0	1.5465		636	1	2.5536
270	1	3.0145		1124	1	3.3591		423	1	5.0308		220	0	1.0007
1832	1	3.5262		673	1	3.7846		1413	1	3.8521		6716	0	4.1145
1857	1	3.5473		678	0	2.971		2359	0	3.3535		196	1	3.9617
420	1	3.0533		2329	0	3.2587		414	0	2.2813		237	1	3.6849
1927	1	4.1094		3781	0	3.7313		698	1	3.7919		308	1	4.4797
2073	1	3.5923		1160	0	2.8014		151	1	3.0252		4086	0	2.8562
6953	1	3.837		587	0	3.4726		2703	0	3.2929		2765	0	4.2064
3869	1	3.8044		1966	0	4.1103		321	1	4.1186		430	1	1.6187
2365	0	4.2427		323	0	3.1228		480	0	2.9469		1438	1	3.1685
5318	1	3.4881		291	0	3.2002		4222	1	4.1449		326	1	1.7446
352	1	3.0181		1109	0	1.766		1643	0	2.609		305	1	4.0462
884	1	3.3883		2022	1	2.3926		519	1	4.2064		1315	1	3.8739
10870	1	3.9194		3683	1	4.4006		2620	0	3.8187		1992	1	4.1194
393	1	3.3591		1864	1	3.9929		996	1	4.3031		464	0	3.9838
1691	1	0.9038		1154	1	3.2959		4129	0	3.8521		4609	0	3.0533
405	0	1.2085		1032	1	0.9191		2273	1	3.9108		608	1	4.3198
1655	1	3.5935		650	0	3.5149		741	0	3.7593		1002	0	1.1641
409	0	4.38		11217	0	3.6555		1264	0	3.7302		847	0	3.1475
1620	0	3.2856		2639	0	3.1426		1917	1	3.8896		839	0	3.7961
1429	1	2.5996		370	0	3.2251		1490	1	3.5136		315	1	3.4197
210	0	3.4778		274	1	3.1475		441	0	3.5923		295	1	3.7836
659	1	3.9856		205	1	3.795		938	1	2.0325		439	0	2.7508
854	1	4.0207		645	0	3.8481		5487	0	4.3534		4526	0	4.174
4255	0	2.236		284	1	4.1836		368	1	1.6558		326	1	2.909
405	0	3.2466		6768	0	3.9079		1780	1	1.8404		1803	0	3.9431
1446	1	3.3647		476	0	2.496		721	1	3.603		2644	0	3.309
1617	0	4.3986		2296	0	3.1701		3514	0	3.9755		769	0	2.4857
401	1	2.8096		3259	1	4.2212		1923	0	4.0198		636	1	4.717
214	0	4.0046		396	0	3.1028		5370	1	3.9156		216	1	4.1302
3136	1	2.7742		1333	1	4.2095		6590	1	4.3285		1078	1	3.8571
4107	0	2.4518		2993	1	3.2885		440	0	3.7291		5219	0	2.5087
619	1	1.5758		1424	1	3.5086		977	0	0.2522		516	1	3.7518
1665	0	4.5693		4070	0	3.9938		3139	1	4.1169		4897	0	2.8622
568	0	3.7709		891	0	3.3192		306	0	2.2723		3932	0	3.4437
2071	1	3.5657		1785	0	3.5098		369	1	-0.2159		4646	0	3.3661
3857	0	3.4739		728	1	3.8147		688	0	2.8076		1487	1	3.4102
6666	0	3.8581		2166	0	3.4687		828	1	3.1129		2470	1	4.2676
632	0	3.4933		9061	1	4.2358		2588	1	2.3926		1492	0	4.1294
796	0	3.5287		263	1	3.6463		7342	0	3.1145		10346	1	4.1946
590	0	3.6324		1059	1	3.5324		390	0	2.4701		4634	1	3.7356
1628	1	4.6485		2948	0	2.8502		1164	0	3.3061		1871	1	4.1523
1888	0	3.4543		1548	1	3.5312		1941	0	3.7582		4000	1	3.5982
1089	0	3.0074		717	0	4.1628		875	1	4.1764		546	0	3.4907
2927	1	3.2811		820	0	3.3856		2423	0	3.9012		1195	1	4.0488
853	0	3.1442		3196	0	4.47		566	1	3.5174		3141	1	4.3965
422	0	3.8491		1640	1	3.7127		1070	1	3.3842		1460	1	3.7006
4942	0	4.0383		325	0	3.9865		825	0	3.1797		723	1	3.8729
4053	0	3.7825		4648	1	4.6708		5318	0	3.6578		813	1	3.6018
301	0	3.7291		417	0	2.9432		487	0	1.5806		2030	1	3.8075
9188	0	4.2639		1695	0	3.6042		2004	1	3.7389		486	0	0.8726
126	0	3.5815		524	0	1.9749		1341	1	3.1733		39	0	2.824
2145	0	3.9365		804	0	4.3667		335	0	2.3135		822	1	3.8827
620	0	1.5661		4414	0	4.5886		2010	0	3.6113		62	0	2.8442
2249	0	4.2877		583	0	2.7095		1792	0	3.287		378	0	3.2692
1429	0	3.3925		640	0	4.3184		2051	0	4.2533		1948	0	4.0454
383	1	4.7517		3176	0	4.0824		553	0	3.4007		4195	0	2.96
4407	0	3.9645		468	1	3.2065		5101	1	3.1129		4062	1	2.7379
3195	1	2.3981		447	1	1.0983		877	1	3.0358		821	1	4.0935
469	1	2.8819		447	0	2.0979		877	1	3.0825		412	0	2.2573
6225	1	4.0645		1860	1	3.7561		368	1	4.1392		808	1	3.1062
1960	1	2.1988		1265	1	3.5149		1940	0	3.573		1229	0	3.2959
360	0	2.8096		1812	0	2.609		601	0	3.9645		3708	0	3.795
760	0	1.1706		279	1	3.4088		955	1	3.9421		490	0	1.9111
2005	1	1.787		6598	1	4.439		218	0	3.1162		278	0	3.8095
426	1	3.9506		841	1	3.7215		779	0	2.4198		1209	0	3.0376
454	0	2.7508		766	0	3.5449		3527	0	3.871		857	1	-0.1031
1010	0	4.1078		4507	1	3.9883		424	1	3.3435		1280	0	4.2706
2828	0	3.3925		3564	1	3.1294		551	0	4.1796		1301	1	3.9974
518	1	3.011		5237	1	3.6486		387	0	3.1062		2028	1	2.5137
818	0	4.0909		1505	0	3.6148		2402	1	3.0463		3106	1	4.3889
1124	0	3.5547		3408	0	3.2002		1949	0	4.1425		180	0	2.0776
1441	1	4.3242		601	1	3.5411		5065	0	3.3047		1354	1	1.683
444	0	2.5658		877	1	4.2404		7514	1	3.5047		1482	0	3.6861
571	0	3.1507		1544	1	3.8157		3587	1	4.857		549	1	2.2082
507	1	4.0171		832	1	4.4156		854	1	3.8818		5107	1	4.5117
2101	1	2.3981		335	0	3.2112		2022	0	3.8105		362	0	2.4623
111	0	2.6805		467	1	2.7073		1478	1	3.4752		8174	1	3.2541
1910	1	4.5386		1026	1	4.1094		2884	0	4.4027		396	1	4.0688
317	1	2.004		319	1	3.9929		359	0	4.1844		395	1	2.791
1044	1	4.3392		1039	0	2.5561		122	1	3.5111		1136	0	3.1604
1197	0	3.652		4930	1	3.9561		650	1	1.4065		561	1	2.7007
361	1	1.7229		2192	1	3.9543		2711	1	4.162		79	1	3.9965
731	0	4.1425		318	0	1.8722		226	0	1.2023		1807	1	3.1588
2950	0	3.4817		620	1	1.9895		478	0	4.2877		11252	0	3.7888
703	0	2.0673		730	1	4.0901		772	0	4.2488		301	0	1.4228
