# Supplementary material for: Prognostic and therapeutic roles of SETD2 in cutaneous melanoma
Source: Aging (Albany NY). 2024 Jun 5;16(11):9692–708. doi: 10.18632/aging.205894 (PMC11210245; doi:10.18632/aging.205894)
Supplement: Supplementary Table 3 [file aging-16-205894-s004.xlsx]

## Sheet: Supplementary Table 3
			Supplementary Table 3. Wound healing assay data.
			0h	A375 hSETD2					0h	A375 wt
			Duplicate hole	1	2	3	4			1	2	3	4
				1263387	1628961	1711757	1756543			1571137	1509766	1656526	1626669
				1335643	1707772	1652242	1682985			1550214	1518922	1640522	1648011
				1494637	1727749	1722037	1692845			1545812	1477510	1612855	1560485
				1620402	1698095	1651485	1683699			1620288	1486178	1605136	1653363
				1400187	1746274	1694202	1734511			1580360	1427662	1592403	1718428
			mean	1.42285e+06	1.70177e+06	1.68634e+06	1.71012e+06		mean	1.57356e+06	1.48401e+06	1.62149e+06	1.64139e+06
			48h	1	2	3	4		48h	1	2	3	4
				221010	401747	377298	367202			957669	745238	353662	333794
				214482	541322	193337	482749			882841	459571	265356	337670
				173119	290556	154965	300267			721378	589594	417871	409175
				277996	196228	210039	66255			533436	323960	362955	384327
				246802	22101	227488	134687			550163	451463	443153	320095
			mean	226682	290391	232625	270232			729097	513965	368599	357012
			（0h-48h）/0h*100%	84.0685	82.936	86.2053	84.198		0h-48h	53.6658	65.3664	77.2678	78.2494
