# Supplementary material for: Prognostic and therapeutic roles of SETD2 in cutaneous melanoma
Source: Aging (Albany NY). 2024 Jun 5;16(11):9692–708. doi: 10.18632/aging.205894 (PMC11210245; doi:10.18632/aging.205894)
Supplement: Supplementary Table 4 [file aging-16-205894-s005.xlsx]

## Sheet: Supplemetary Table 4
	Supplementary Table 4. Tumor volume of A375 borne by nude mice with or without SETD2 expressoin.
	观察日期	实验分组
	日期:	SETD2-KO			WT
	11.23	长径	短径	体积	长径	短径	体积
	接种后天数：	4.22	3.97	33.2555	4	3.37	22.7138
	4	4.26	3.75	29.9531	3.99	3.25	21.0722
		3.71	3.99	29.5318	4.11	3.38	23.4771
		3.07	3.03	14.0927	4.07	3.75	28.6172
		3.65	3.57	23.2594	4.61	3.99	36.6958
		均数		26.0185			26.5152
		标准差		7.58347			6.35158
	日期:	4.23	3.36	23.8775	4.79	3.31	26.2399
	2024-11-26	6.4	5.06	81.9315	3.83	2.62	13.1453
	接种后天数：	4.31	3.25	22.7622	4.35	3.93	33.5927
	7	4.31	3.16	21.519	4.12	3.95	32.1412
		5.01	4.19	43.978	4.98	4.5	50.4225
		均数		38.8136			31.1083
		标准差		25.815			13.4782
	日期：	4.89	4.29	44.998	4.16	3.96	32.6177
	2024-11-29	7.89	6.23	153.117	3.8	3.3	20.691
	接种后天数：	3.85	3.85	28.5333	3.39	3.05	15.7677
	10	3.82	3.73	26.5736	4.47	4.37	42.6816
		7.49	6.14	141.185	3.57	2.97	15.7453
		均数		78.8814			25.5007
		标准差		62.8724			11.8202
	日期：	5.46	4.97	67.4335	5.38	5.05	68.6017
	2024-12-02	8.31	6.26	162.824	3.81	3.4	22.0218
	接种后天数：	5.19	4.11	43.835	4.81	4.11	40.6255
	13	8.38	4.42	81.8575	6.5	4.55	67.2831
		7.64	6.91	182.398	3.84	3.82	28.0174
		均数		107.67			45.3099
		标准差		61.2095			21.7292
	日期：	8.57	6.16	162.597	7.44	5.8	125.141
	2024-12-05	11.36	7.53	322.061	5.17	4.78	59.0631
	接种后天数:	8.76	5.36	125.836	5.55	4.84	65.006
	16	9.47	6.83	220.883	9.36	6.57	202.012
		11.5	8.92	457.507	4.23	4	33.84
		均数		257.777			97.0123
		标准差		134.027			67.5858
	日期：	9.98	8.06	324.168	10.66	6.74	242.129
	2024-12-08	12.38	9.14	517.11	5.77	3.86	42.9853
	接种后天数:	11.48	8.95	459.788	6.47	6.13	121.561
	19	11.46	9.14	478.682	9.26	9.16	388.483
		12.71	9.9	622.854	4.75	4.65	51.3534
		均数		480.52			169.302
		标准差		107.792			146.194
	日期：	10.99	8.09	359.637	12.63	8.85	494.607
	2024-12-11	14.37	9.35	628.131	5.49	4.09	45.9186
	接种后天数:	13.6	7.59	391.735	7.4	7.03	182.857
	22	12.51	9.55	570.472	12.47	7.87	386.177
		14.34	9.17	602.917	8.47	6.92	202.799
		均数		510.578			262.472
		标准差		125.339			177.471
		14.78	11.13	915.45	9.25	8.77	355.722
	2024-12-14	16.89	10.33	901.157	5.7	5.58	88.7387
		14.59	10.61	821.213	11	7.65	321.874
	25	18.43	12.31	1396.41	14.02	8.77	539.159
		15.23	10.23	796.932	15.14	8.44	539.238
		均数		966.231			368.946
		标准差		245.741			186.332
