# Supplementary material for: Prognostic and therapeutic roles of SETD2 in cutaneous melanoma
Source: Aging (Albany NY). 2024 Jun 5;16(11):9692–708. doi: 10.18632/aging.205894 (PMC11210245; doi:10.18632/aging.205894)
Supplement: Supplementary Table 5 [file aging-16-205894-s006.xlsx]

## Sheet: Supplemetary Table 5
Supplementary Table 5. Different expressed genes in TCGA-SKCM samples by SETD2 expression level.
up.genes			up.genes			up.genes			up.genes			up.genes			up.genes			up.genes
TSPAN10	down		CLASP2	up		SIKE1	up		DICER1	up		USO1	up		ZHX1	up		ZCCHC24	up
OCA2	down		SPAST	up		LEMD3	up		PCM1	up		SLC25A24	up		ATAD2	up		PLOD2	up
NMRK2	down		CEBPZ	up		PMS1	up		NAB1	up		ZNF197	up		SELENOF	up		SATB1	up
SLC7A4	down		QSER1	up		LARP7	up		UACA	up		SLC25A46	up		ATP2B1	up		ENAH	up
CAPG	down		DEK	up		VEZF1	up		CDK6	up		HS2ST1	up		ITGB1	up		LAMB1	up
PMEL	down		KIF15	up		ZBTB44	up		TYW3	up		DMTF1	up		PKD2	up		RHOBTB3	up
BIRC7	down		SMC3	up		NOL8	up		KIAA0232	up		SH3RF1	up		CREBZF	up		KAT2B	up
PAEP	down		LRRC58	up		CWF19L2	up		RABEP1	up		FOXN2	up		KCTD3	up		LIFR	up
KRTAP19-1	down		PIBF1	up		PIKFYVE	up		NAA16	up		ZNF468	up		PGM2	up		CERS6	up
GPR143	down		SMC2	up		KIF20B	up		UBA6	up		DPY19L4	up		TMPO	up		DLC1	up
VGF	down		IREB2	up		BAZ1A	up		KRR1	up		HAUS6	up		PGAP1	up		ANLN	up
TYR	down		ZBTB6	up		ARL14EP	up		CSNK1A1	up		UFM1	up		HACD2	up		ARHGAP42	up
SLC45A2	down		PUM2	up		DNAJC21	up		ITPRID2	up		FRS2	up		MOSPD2	up		TMX4	up
MLANA	down		CDKN2AIP	up		TMF1	up		TRAPPC13	up		AFF4	up		STIM2	up		ETV1	up
TYRP1	down		LTN1	up		NMD3	up		SPDL1	up		GOLIM4	up		CDC42BPA	up		NXT2	up
S100A7	down		ZBTB1	up		BTAF1	up		SMURF2	up		COPB1	up		SPRED1	up		ITGA2	up
SETD2	up		SMAD5	up		SPIN1	up		DNAJB14	up		UBLCP1	up		DDR2	up		TRIM2	up
DCP1A	up		SETX	up		XPC	up		LIN9	up		CKAP2	up		ASAP2	up		ITGA1	up
KIAA1143	up		MAN1A2	up		NEDD1	up		ITCH	up		BLOC1S6	up		BMI1	up		ARHGEF6	up
TOP2B	up		ZNF184	up		PHF20L1	up		FAM172A	up		PREPL	up		IGIP	up		DDX58	up
APPL1	up		RC3H2	up		TNKS2	up		TAF1A	up		RCBTB1	up		EIF1AX	up		ALCAM	up
SLMAP	up		RAB33B	up		MPHOSPH8	up		BACH1	up		DNAJC2	up		PCMTD1	up		PRKCA	up
TASOR	up		ZMYM1	up		CFAP97	up		TLK1	up		RAP2A	up		CFAP126	up		LAMA4	up
CRBN	up		BRWD3	up		BBX	up		TASOR2	up		RNF6	up		CCDC112	up		DCHS1	up
CREB1	up		CTDSPL2	up		RPAP3	up		DR1	up		RB1	up		ZNF300	up		SEMA3C	up
ROCK2	up		GOLGB1	up		OTUD4	up		IL6ST	up		RPRD1A	up		MBNL3	up		AHR	up
LZTFL1	up		WAPL	up		RANBP2	up		PSIP1	up		TMEM167A	up		MEX3B	up		STARD13	up
ROCK1	up		SPOPL	up		IQCB1	up		DCK	up		RECQL	up		ACSL4	up		RARB	up
CCP110	up		OSBPL11	up		XPO1	up		DCAF16	up		ODR4	up		TAF4B	up		KHDRBS3	up
ZNF644	up		FYTTD1	up		RHOT1	up		CTTNBP2NL	up		NOP58	up		KIF11	up		ERRFI1	up
EPM2AIP1	up		SMC5	up		RFX7	up		PDZD8	up		WASHC4	up		ATM	up		TMEM47	up
NR1D2	up		ICE1	up		AHCTF1	up		MTR	up		CHML	up		DBF4	up		LPAR6	up
ZNF148	up		FBXL3	up		ZBTB41	up		MTF2	up		TMX3	up		MZT1	up		PLSCR4	up
ARID4B	up		MTX3	up		KLHL8	up		UTP23	up		NRAS	up		PRELID3B	up		PTPN13	up
WDR48	up		COMMD2	up		CCAR1	up		MTREX	up		PDCD10	up		KIF14	up		IL1RAP	up
ERCC6L2	up		SOCS4	up		AGL	up		TFAM	up		OTUD6B	up		ZBTB38	up		PDGFC	up
PIK3CA	up		NFAT5	up		PURA	up		CDC73	up		TANK	up		STK38L	up		AKAP12	up
CASP8AP2	up		ZNF639	up		XIAP	up		ZKSCAN8	up		BMPR1A	up		MAML2	up		GASK1B	up
ZNF507	up		SUZ12	up		USPL1	up		PHF3	up		CD2AP	up		ARGLU1	up		LOX	up
TUT4	up		RSPRY1	up		BRCC3	up		ZNF354C	up		PAIP1	up		YEATS4	up		PRKAR2B	up
NR2C2	up		TAF1B	up		LIG4	up		FCHO2	up		DPY19L3	up		TMEM30A	up		TMEM178B	up
REST	up		ZMYM2	up		AKAP11	up		GMCL1	up		NEK7	up		NDFIP2	up		CREB5	up
ZNF41	up		KTN1	up		CCDC186	up		TAB2	up		MICU2	up		MAD2L1	up		IFIH1	up
ATRX	up		PRKAR2A	up		JMY	up		ANKIB1	up		COG6	up		PI4K2B	up		DPYD	up
NIPBL	up		ZNF92	up		QKI	up		SOS1	up		TMEM106B	up		ARHGAP12	up		GPRIN3	up
NEK4	up		SLC4A7	up		KIAA1586	up		RAB3GAP2	up		NUDCD1	up		HDGFL3	up		FBN1	up
STAG1	up		MED13	up		CEP97	up		OXR1	up		MOSMO	up		LIMS1	up		CRISPLD1	up
SMC4	up		SMARCA5	up		PKN2	up		ARL5B	up		GXYLT1	up		DOCK4	up		ITGA6	up
BOD1L1	up		ARHGAP5	up		PHF14	up		ZNF354B	up		ARFGEF1	up		DIAPH3	up		RFTN2	up
ZNF136	up		PHIP	up		CCDC88A	up		SACS	up		UFL1	up		SLFN12	up		SNTB1	up
GCC2	up		SASS6	up		MPHOSPH9	up		WBP4	up		MYSM1	up		SSX2IP	up		RGS5	up
PHC3	up		ETAA1	up		ZRANB2	up		EIF2AK2	up		EXTL2	up		HSP90AA1	up		MEX3A	up
RIF1	up		BBS10	up		PNRC2	up		FAM13B	up		MBNL2	up		ZC3HAV1L	up		OSMR	up
BDP1	up		FRYL	up		TRIM44	up		SEC24B	up		CHM	up		EEA1	up		NLGN3	up
ZNF510	up		ZNF45	up		PPIP5K2	up		GORAB	up		RBBP8	up		MTDH	up		JAM3	up
UBXN7	up		SRFBP1	up		USP16	up		SAMD8	up		TRUB1	up		SPATA6	up		MMP16	up
GOLGA4	up		ZFR	up		MEF2A	up		PANK3	up		LYSMD3	up		SGTB	up		ANGPT1	up
AZI2	up		KIAA1109	up		PPP4R2	up		CNST	up		TAF9B	up		HOMER1	up		RND3	up
ARID4A	up		NEMF	up		MFAP3	up		TOP1.00	up		NEDD4	up		RAD51AP1	up		SYT11	up
KIF2A	up		NHLRC2	up		ZNF322	up		ABCD3	up		CCDC14	up		ASPH	up		HMCN1	up
ZNF292	up		NOC3L	up		XRN2	up		SHLD2	up		PNPLA8	up		SC5D	up		CSGALNACT1	up
CAPN7	up		SMCHD1	up		SCRN3	up		CNTRL	up		PNISR	up		ANKRD10	up		LIMCH1	up
ELF2	up		SKIL	up		CCNT2	up		EIF4G2	up		GLS	up		CEP70	up		NLGN1	up
PRKCI	up		RBM26	up		ZDHHC17	up		LUC7L3	up		NPAT	up		FAM126A	up		PCDH7	up
DENND6A	up		RAD18	up		CDC40	up		PURB	up		C18orf54	up		CENPF	up		ITGA4	up
GPATCH2L	up		LATS1	up		ZNHIT6	up		FNDC3A	up		MINDY2	up		HMMR	up		CCDC80	up
SENP7	up		RBL2	up		PRPF38B	up		RSF1	up		COPS2	up		STAMBPL1	up		FHL1	up
REV1	up		GABPA	up		PPP1R2	up		NUP58	up		ARL6IP6	up		FAM102B	up		SAMD9L	up
PBRM1	up		SF3B1	up		CUL4B	up		FBXL17	up		ANKRD50	up		NUF2	up		FMNL2	up
ZBTB11	up		TAOK1	up		NRIP1	up		TTC14	up		KLHL24	up		MEF2C	up		GPR155	up
SMARCAD1	up		ADAM17	up		ZNF28	up		CAMSAP2	up		TNPO1	up		CILK1	up		FZD6	up
ZNF845	up		ZNF638	up		SLC25A36	up		PTPRG	up		PRPF39	up		SLC5A3	up		ESM1	up
PDS5B	up		GPALPP1	up		UBXN4	up		CEP170	up		KLHL5	up		ZNF83	up		FLRT3	up
DLG1	up		PPP4R3B	up		ZZZ3	up		SCAMP1	up		ZNF302	up		DOCK11	up		CDH2	up
ZNF518A	up		LRRC40	up		MFN1	up		ZMYM5	up		FPGT	up		LYPLA1	up		MAP2	up
CEP295	up		APAF1	up		TMTC3	up		SNX6	up		IPO7	up		GOLM2	up		SPRY4	up
PPIG	up		SACM1L	up		LMBRD2	up		BTBD3	up		RAB8B	up		UTRN	up		NID1	up
DCUN1D1	up		ATF2	up		HNRNPH1	up		CIP2A	up		TOP2A	up		LBR	up		TNFRSF19	up
ANKRD12	up		DBT	up		SEC62	up		MARCHF7	up		C6orf120	up		POGLUT3	up		THBS4	up
USP34	up		DCP2	up		EVI5	up		CDK19	up		SUCO	up		DEPDC1	up		CDH19	up
MIS18BP1	up		SREK1	up		RICTOR	up		ECT2	up		PAK1IP1	up		GNG12	up		PEG10	up
N4BP2	up		TRPM7	up		UHRF1BP1L	up		KDM7A	up		PCMTD2	up		GAS2L3	up		EPHA3	up
USP47	up		PIK3C2A	up		MORC3	up		KPNA3	up		TXNDC16	up		TGFBR2	up		ANXA1	up
DHX36	up		RB1CC1	up		ZDHHC20	up		MBNL1	up		ODF2L	up		GLCE	up		SLC40A1	up
CEP135	up		MIER1	up		CEP162	up		SLU7	up		SLC39A10	up		SETD7	up		PRRX1	up
CHD9	up		PDS5A	up		GPBP1	up		ZNF33A	up		AMD1	up		SEPTIN11	up		IFI44	up
CEP120	up		RFC1	up		CRYBG3	up		MTMR12	up		HEATR1	up		CDK14	up		PTPRZ1	up
DENND4A	up		RSRC1	up		CENPE	up		CCNG2	up		UCHL5	up		ARRDC3	up		C1QTNF3	up
ZNF260	up		ZNF397	up		CSNK1G3	up		BLZF1	up		SINHCAF	up		EPB41L2	up		SEMA3A	up
TPR	up		TTC37	up		TENT2	up		RP2	up		LRP6	up		PRKACB	up		LPAR1	up
RLF	up		ZNF770	up		PAN3	up		ABCE1	up		CD46	up		RASSF8	up		POSTN	up
FER	up		ANKRD13C	up		PAXBP1	up		VGLL4	up		RESF1	up		AMOTL1	up		CHRDL1	up
SMARCC1	up		ZNF721	up		FAM217B	up		THAP12	up		ITGAV	up		RIN2	up		ART3	up
GNL3	up		ZFX	up		NR3C1	up		MPHOSPH10	up		AKT3	up		SGCB	up		AKAP6	up
ZNF621	up		NUP54	up		FAM214A	up		ELK3	up		UBE2Q2	up		CCNA2	up		DLX1	up
EPC2	up		NEK1	up		VPS13C	up		C5orf24	up		CALD1	up		KLHL23	up		SLC35F1	up
CEP44	up		ZNF131	up		SNX13	up		RASA2	up		MSANTD4	up		REV3L	up		MEOX2	up
USP1	up		CMTM6	up		TBL1XR1	up		DDX21	up		KDM1B	up		DPY19L1	up		VCAN	up
SCAF11	up		TCF12	up		NAA15	up		TOPORS	up		GNB4	up		SAMD9	up		ID4	up
ICE2	up		CEP350	up		N4BP2L2	up		ARFIP1	up		NBN	up		PLS3	up		FREM1	up
ZMYM4	up		SLK	up		PTPN11	up		DENND4C	up		CNOT1	up		RBMS3	up		SDC2	up
ARL13B	up		RSBN1L	up		RYK	up		KIF5B	up		YES1	up		SH3D19	up		SPARCL1	up
ZNF791	up		MBTD1	up		PTAR1	up		CAND1	up		CLIC4	up		MAML3	up		ABCA8	up
POLK	up		OSBPL8	up		LIN7C	up		PIK3R1	up		RAB23	up		FRMD6	up		HMGA2	up
PPP1R12A	up		TRAPPC8	up		CHD1	up		SEPTIN10	up		KLF12	up		NCAPG	up		LOXL3	up
G2E3	up		SNRNP48	up		ZNF654	up		ABCB10	up		HSPA13	up		GPR180	up		ITGB8	up
ZNF614	up		DIS3	up		MAP3K7	up		FAM8A1	up		KIF18A	up		CCDC50	up		SFRP1	up
ZFC3H1	up		MTMR6	up		HIPK3	up		EDEM3	up		DENND11	up		IL17RD	up		MEGF10	up
NUDT21	up		TBC1D23	up		NUCKS1	up		PJA2	up		ZNF441	up		TGDS	up		PTN	up
SP4	up		RMI1	up		EXOC5	up		SCYL2	up		UBE4A	up		MEGF9	up		SV2A	up
CWC22	up		SIRT1	up		ERBIN	up		LRRCC1	up		PTPN12	up		KCTD12	up		ELOVL2	up
RAB11FIP2	up		MAP3K2	up		NKAPD1	up		BTBD1	up		ANO6	up		GNG2	up		IGFBP5	up
PHF6	up		ATP13A3	up		ASPM	up		RBAK	up		CSGALNACT2	up		GULP1	up		GAP43	up
PRPF4B	up		SENP6	up		RASA1	up		CCDC91	up		TAX1BP1	up		DLGAP5	up		CHL1	up
SP3	up		APC	up		TIA1	up		RAD21	up		GFM2	up		TWSG1	up		MAGEA10	up
THOC2	up		CUL5	up		CENPQ	up		LANCL1	up		ADD3	up		SKAP2	up		SERPINA5	up
ZNF776	up		ZBTB26	up		VPS36	up		POLR1F	up		EIF4A2	up		SPRY2	up		ITGB3	up
TOPBP1	up		FBXO45	up		HOOK3	up		TBC1D15	up		MOB1B	up		ZEB1	up		COL11A2	up
ESF1	up		BPTF	up		SMC6	up		RPS6KA3	up		ZNF25	up		SESN3	up		THBS2	up
LPP	up		PCNP	up		MAP4K5	up		KBTBD6	up		LGR4	up		WWTR1	up		SPP1	up
FBXO11	up		ACAP2	up		RANBP6	up		MAP3K1	up		ETNK1	up		MPDZ	up		MAGEC2	up
SOCS5	up		GPATCH11	up		DNTTIP2	up		PRKAA1	up		CHURC1	up		B4GALT6	up		LGI4	up
TRIP11	up		ZNF146	up		ATF1	up		RIOK1	up		RDX	up		NECTIN3	up		MAGEA4	up
ZNF627	up		NUP160	up		THAP5	up		TMEM170B	up		GAB1	up		TBC1D4	up		NELL1	up
STAG2	up		CUL3	up		LYRM7	up		TMED5	up		PRKAB2	up		DDX60	up		NGFR	up
ATP11B	up		MIER3	up		ZNF84	up		IPO5	up		NAPEPLD	up		DST	up		EDN3	up
PRPF40A	up		DCLRE1A	up		PHTF2	up		FMR1	up		TMEM123	up		SMARCA1	up		MAGEA1	up
U2SURP	up		ZNF12	up		SSB	up		IBTK	up		MAPK6	up		PM20D2	up		ANGPTL7	up
MIB1	up		SGO2	up		TAF2	up		ESCO1	up		DIXDC1	up		FAM111B	up		MAGEA12	up
JMJD1C	up		TRMT13	up		SNX4	up		FAM76B	up		SLC38A2	up		CNN3	up		MAGEC1	up
RO60	up		ZYG11B	up		BIRC2	up		MAP4K4	up		CUL2	up		PPFIBP1	up		MAGEA6	up
XRN1	up		PPIL4	up		KLHL20	up		FERMT2	up		OGT	up		KLF9	up		MAGEA3	up
NKTR	up		ASH1L	up		AKAP9	up		RNF138	up		EDEM1	up		F2R	up		MPZ	up
BCLAF1	up		ZNF655	up		MANEA	up		MNS1	up		LPGAT1	up		ROBO1	up		IL13RA2	up
WWC2	up		TRIM23	up		HLTF	up		SECISBP2L	up		ELF1	up		PGM2L1	up		FAR1	up
SYNJ2BP	up		USP33	up		SRSF11	up		ATP11C	up		CTNNAL1	up		FNBP1L	up
