# Supplementary material for: Prognostic and therapeutic roles of SETD2 in cutaneous melanoma
Source: Aging (Albany NY). 2024 Jun 5;16(11):9692–708. doi: 10.18632/aging.205894 (PMC11210245; doi:10.18632/aging.205894)
Supplement: Supplementary Table 6 [file aging-16-205894-s007.xlsx]

## Sheet: Supplemetary Table 6
A375-CCK8
		Supplementary Table 6. CCK-8 assay of DDP cytotoxicity in A375 cells with or without SETD2 expression.
			SETD2				DDP					SEDT2 0.625+DDP					SEDT2 1.25+DDP					SEDT2 2.5+DDP					SEDT2 5+DDP
		CON	0.625	1.25	2.5	5	0.3125	0.625	1.25	2.5	5	0.3125	0.625	1.25	2.5	5	0.3125	0.625	1.25	2.5	5	0.3125	0.625	1.25	2.5	5	0.3125	0.625	1.25	2.5
		3.169	3.055	2.872	3.072	2.988	2.314	1.986	1.637	1.26	0.365	2.605				0.429		2.426	1.663	1.213	0.783	2.922	2.484	1.613	1.199	0.643	2.657	2.297	1.507	1.208
		3.139	3.206	2.944	3.159	3.016	2.82	2.083	1.463	1.215	0.478	2.823	2.459	1.509	1.194	0.584	2.686	2.425	1.481	1.131	0.672	2.874			1.282	0.663	2.367	2.328	1.51	1.251
		3.178	2.999	2.999	3.106	2.404	2.722	2.074	1.473	1.144	0.526	2.853	2.436	1.566	1.127	0.64	2.817	2.493	1.528	1.147	0.753	2.89	2.541	1.809	1.289	0.694			1.464	1.089
	mean	3.162	3.08667	2.93833	3.11233	2.80267	2.61867	2.04767	1.52433	1.20633	0.456333	2.76033	2.4475	1.5375	1.1605	0.551	2.7515	2.448	1.55733	1.16367	0.736	2.89533	2.5125	1.711	1.25667	0.666667	2.512	2.3125	1.49367	1.18267
	inhibition rat%		2.38246	7.07358	1.57074	11.3641	17.1832	35.2414	51.7921	61.849	85.5682	12.7029	22.5965	51.3757	63.2985	82.5743	12.9823	22.5806	50.7485	63.1984	76.7236	8.43348	20.5408	45.8887	60.2572	78.9163	20.5566	26.8659	52.762	62.5975
			SETD2				DDP					SEDT2 0.625+DDP					SEDT2 1.25+DDP					SEDT2 2.5+DDP					SEDT2 5+DDP
		CON	0.625	1.25	2.5	5	0.3125	0.625	1.25	2.5	5	0.3125	0.625	1.25	2.5	5	0.3125	0.625	1.25	2.5	5	0.3125	0.625	1.25	2.5	5	0.3125	0.625	1.25	2.5
		3.202	3.041	2.856	3.055	2.991	2.314	1.986	1.637	1.26	0.365	2.59				0.43		2.422	1.655	1.215	0.786	2.919	2.472	1.612	1.2	0.643	2.657	2.293	1.508	1.203
		3.165	3.186	2.938	3.139	3.022	2.82	2.083	1.463	1.215	0.478	2.82	2.469	1.507	1.194	0.585	2.686	2.421	1.476	1.132	0.671	2.862	2.259	1.554	1.28	0.664	2.355	2.325	1.509	1.252
		3.148	2.982	2.997	3.103	2.388	2.722	2.074	1.473	1.144	0.526	2.853	2.438	1.569	1.128	0.64	2.812	2.489	1.524	1.145	0.754	2.895	2.541	1.808	1.29	0.696			1.46	1.091
	mean	3.17167	3.06967	2.93033	3.099	2.80033	2.61867	2.04767	1.52433	1.20633	0.456333	2.75433	2.4535	1.538	1.161	0.551667	2.749	2.444	1.55167	1.164	0.737	2.892	2.424	1.658	1.25667	0.667667	2.506	2.309	1.49233	1.182
	inhibition rat%		3.21597	7.60904	2.29112	11.7078	17.4356	35.4388	51.939	61.9653	85.6122	13.1582	22.6432	51.5081	63.3946	82.6064	13.3263	22.9427	51.0772	63.3001	76.763	8.81766	23.5733	47.7246	60.3783	78.949	20.9879	27.1992	52.948	62.7325
		60h
			SETD2				DDP					SEDT2 0.625+DDP					SEDT2 1.25+DDP					SEDT2 2.5+DDP					SEDT2 5+DDP
		CON	0.625	1.25	2.5	5	0.3125	0.625	1.25	2.5	5	0.3125	0.625	1.25	2.5	5	0.3125	0.625	1.25	2.5	5	0.3125	0.625	1.25	2.5	5	0.3125	0.625	1.25	2.5
		3.889	3.955	3.351	3.844	3.821		2.445	2.063	1.452	0.317	3.639		1.336	1.126	0.41		3.257	2.118	1.688	0.79	3.463	2.968	1.998	1.501	0.697	3.459	2.934	1.903	1.471
		3.987		3.825	3.86	3.591	3.581	2.503	1.816	1.364	0.489	3.723	3.286	1.968	1.523	0.593	3.405	3.01	1.972	1.39	0.744	3.543	2.739	1.964	1.484	0.763	2.989	2.791	1.845	1.496
		3.879	3.883	3.906		2.964	3.623	2.505	1.823	1.21	0.492	3.988	3.617	2.142	1.43	0.671	3.603	3.166	1.958	1.378	0.637	3.623	3.29	2.135	1.644	0.759			1.714	1.167
	mean	3.91833	3.919	3.694	3.852	3.45867	3.602	2.48433	1.90067	1.342	0.432667	3.78333	3.4515	1.81533	1.35967	0.558	3.504	3.14433	2.016	1.48533	0.723667	3.543	2.999	2.03233	1.543	0.739667	3.224	2.8625	1.82067	1.378
	inhibition rat%		-0.017014	5.72522	1.6929	11.7312	8.07316	36.5972	51.493	65.7507	88.9579	3.44534	11.9141	53.6708	65.2999	85.7593	10.5742	19.7533	48.5496	62.0927	81.5313	9.5789	23.4624	48.1327	60.621	81.1229	17.7201	26.946	53.5347	64.832
		a375wt	40	20	10	5	2.5	1.25	0.625	0.3125	0.15625	0	DDP Concentration(ug/ml)
			0.25	0.254	0.249	0.296	0.494	0.755	1.075	1.467	1.809	2.097
			0.271	0.268		0.349	0.595		1.275			2.116
			0.274		0.286			0.838	1.289	1.651		2.037
		mean	0.265	0.261	0.2675	0.3225	0.5445	0.7965	1.213	1.559	1.809	2.08333
		inhibition	87.28	87.472	87.16	84.52	73.864	61.768	41.776	25.168	13.168
		a375 shSETD2	40	20	10	5	2.5	1.25	0.625	0.3125	0.15625	0	DDP Concentration(ug/ml)
			0.231		0.267	0.254	0.24	0.371	0.549	0.752	0.767	0.871
			0.225	0.255	0.26	0.257		0.343	0.519	0.653
			0.23	0.239			0.254	0.322	0.528	0.619	0.723	0.886
		mean	0.228667	0.247	0.2635	0.2555	0.247	0.345333	0.532	0.674667	0.745	0.8785
		inhibition	73.9708	71.8839	70.0057	70.9163	71.8839	60.6906	39.4422	23.2024	15.1964
		a375wt	40	20	10	5	2.5	1.25	0.625	0.3125	0.15625	0	DDP Concentration(ug/ml)
			0.26	0.265	0.258	0.313	0.511	0.773	1.067	1.46	1.804	2.091
			0.281	0.263	0.29	0.33	0.552	0.782	1.071	1.454	1.778	2.119
			0.298	0.31	0.292	0.345	0.53	0.748	1.125	1.426	1.899	2.05
		mean	0.279667	0.279333	0.28	0.329333	0.531	0.767667	1.08767	1.44667	1.827	2.08667
		inhibition	86.5974	86.6134	86.5815	84.2173	74.5527	63.2109	47.8754	30.6709	12.4441
		a375 shSETD2	40	20	10	5	2.5	1.25	0.625	0.3125	0.15625	0	DDP Concentration(ug/ml)
			0.248	0.25	0.269	0.256	0.25	0.366	0.53	0.702	0.793	0.875
			0.262	0.285	0.282	0.278	0.256	0.354	0.527	0.659	0.712	0.886
			0.26	0.256	0.271	0.264	0.274	0.347	0.539	0.642	0.749	0.885
		mean	0.256667	0.263667	0.274	0.266	0.26	0.355667	0.532	0.667667	0.751333	0.882
		inhibition	70.8995	70.1058	68.9342	69.8413	70.5215	59.675	39.6825	24.3008	14.8148
		a375wt	40	20	10	5	2.5	1.25	0.625	0.3125	0.15625	0	DDP Concentration(ug/ml)
			0.256	0.262	0.256	0.305	0.511	0.765	1.107	1.52	1.835	2.096
			0.278	0.27	0.296	0.349	0.591	0.871	1.228	1.653	1.995	2.134
			0.281	0.303	0.287	0.358	0.606	0.833	1.27	1.631		2.067
		mean	0.271667	0.278333	0.279667	0.337333	0.569333	0.823	1.20167	1.60133	1.915	2.099
		inhibition	87.0573	86.7397	86.6762	83.9289	72.876	60.7909	42.7505	23.7097	8.76608
		a375 shSETD2	40	20	10	5	2.5	1.25	0.625	0.3125	0.15625	0	DDP Concentration(ug/ml)
			0.237	0.25	0.268	0.255	0.243	0.371	0.554	0.753	0.785	0.869
			0.233	0.261	0.263	0.261		0.348	0.528	0.67	0.697	0.887
			0.235				0.257		0.531	0.625	0.733	0.88
		mean	0.235	0.2555	0.2655	0.258	0.25	0.3595	0.537667	0.682667	0.738333	0.878667
		inhibition	73.2549	70.9219	69.7838	70.6373	71.5478	59.0857	38.8088	22.3065	15.9712
