# Supplementary material for: Prognostic and therapeutic roles of SETD2 in cutaneous melanoma
Source: Aging (Albany NY). 2024 Jun 5;16(11):9692–708. doi: 10.18632/aging.205894 (PMC11210245; doi:10.18632/aging.205894)
Supplement: Supplementary Table 7 [file aging-16-205894-s008.xlsx]

## Sheet: Supplemetary Table 7
		Supplementary Table 7. CCK-8 assay of cytotoxicity data in B16F10 cells.
		60h
			EZM0414				DDP				EZM0414 0.625+DDP				EZM0414 1.25+DDP				EZM0414 2.5+DDP				EZM0414 5+DDP
		CON	0.625	1.25	2.5	5	0.625	1.25	2.5	5	0.625	1.25	2.5	5	0.625	1.25	2.5	5	0.625	1.25	2.5	5	0.625	1.25	2.5	5
		2.321	1.97	1.956	1.949	1.855	1.883	1.889	1.459	1.044	1.971	1.785	1.711	1.02	2.158	2.182	1.807	1.232	1.987	2.435	2.219	1.192	1.944	2.46	1.809	1.355
		2.541	1.889	1.967	1.863	1.962	2.033	1.762	1.423	1.083	2.138	2.162	1.635	1.146	2.152	1.833	1.701	1.182	1.988	2.171	1.81	1.2	2.273	2.003	1.779	1.238
		2.381	1.988	2.023	2.007	1.775	1.884	1.978	1.565	0.979	2.04	1.878	1.324	1.354	1.747	1.95	1.585	1.242	2.051	1.895	1.535	1.286	2.192	2.108	1.523	1.259
	mean	2.41433	1.949	1.982	1.93967	1.864	1.93333	1.87633	1.48233	1.03533	2.04967	1.94167	1.55667	1.17333	2.019	1.98833	1.69767	1.21867	2.00867	2.167	1.85467	1.226	2.13633	2.19033	1.70367	1.284
	inhibition rate(%)		19.2738	17.9069	19.6604	22.7944	19.9227	22.2836	38.6028	57.1172	15.1042	19.5775	35.524	51.4014	16.3744	17.6446	29.6838	49.5237	16.8024	10.2444	23.181	49.2199	11.5146	9.27792	29.4353	46.8176
			EZM0414				DDP				EZM0414 0.625+DDP				EZM0414 1.25+DDP				EZM0414 2.5+DDP				EZM0414 5+DDP
		CON	0.625	1.25	2.5	5	0.625	1.25	2.5	5	0.625	1.25	2.5	5	0.625	1.25	2.5	5	0.625	1.25	2.5	5	0.625	1.25	2.5	5
		2.544	2.038	2.067	2.048	1.913	1.944	2.042	1.631	1.1	2.009	1.907	1.782	1.135	2.083	2.068	1.595	1.265	2.031	2.295	1.936	1.224	1.981	2.249	1.704	1.265
		2.393	2.054	2.067	2.028	2.031	2.04	1.89	1.57	1.119	2.139	2.13	1.662	1.213	2.156	1.9	1.666	1.248	2.013	1.863	1.701	1.248	2.277	2.093		1.274
		2.394	2.08	2.21	2.223	1.859	1.927	2.122	1.63	1.032	2.049	2.026	1.499	1.411	1.867	2.019	1.755	1.284	1.882	1.632	1.575	1.351	2.018	2.034		1.297
	mean	2.44367	2.05733	2.11467	2.09967	1.93433	1.97033	2.018	1.61033	1.08367	2.06567	2.021	1.64767	1.253	2.03533	1.99567	1.672	1.26567	1.97533	1.93	1.73733	1.27433	2.092	2.12533	1.704	1.27867
	inhibition rate(%)		15.8096	13.4634	14.0772	20.843	19.3698	17.4192	34.1018	55.6541	15.4686	17.2964	32.574	48.7246	16.7099	18.3331	31.5782	48.2062	19.1652	21.0203	28.9047	47.8516	14.3909	13.0269	30.2687	47.6743
			EZM0414				DDP				EZM0414 0.625+DDP				EZM0414 1.25+DDP				EZM0414 2.5+DDP				EZM0414 5+DDP
		CON	0.625	1.25	2.5	5	0.625	1.25	2.5	5	0.625	1.25	2.5	5	0.625	1.25	2.5	5	0.625	1.25	2.5	5	0.625	1.25	2.5	5
		2.553	2.046	2.3	2.258	2.142	2.126	2.23	1.815	1.176	2.186	2.239	1.637	1.355	2.317	2.34	1.659	1.419	2.233	2.315	1.879	1.487	2.331	2.263		1.387
		2.677	2.163	2.188	2.057	2.269	2.179	2.27	1.544	1.222	2.258	2.208	1.715	1.39	2.237	2.046	1.861	1.415	2.166	2.137	1.896	1.365	2.378	2.158		1.371
		2.508	2.2	2.081	2.036	2.046	2.16	1.927	1.728	1.196	2.135	2.054	1.8	1.515	1.917	2.281	1.838	1.383	1.874	1.876	1.703	1.347	2.088	2.054	1.794	1.375
	mean	2.57933	2.13633	2.18967	2.117	2.15233	2.155	2.14233	1.69567	1.198	2.193	2.167	1.71733	1.42	2.157	2.22233	1.786	1.40567	2.091	2.10933	1.826	1.39967	2.26567	2.15833	1.794	1.37767
	inhibition rate(%)		17.175	15.1073	17.9245	16.5547	16.4513	16.9424	34.2595	53.5539	14.978	15.986	33.4195	44.947	16.3737	13.8408	30.7573	45.5027	18.9325	18.2218	29.2065	45.7353	12.1608	16.322	30.4471	46.5883
