# Supplementary material for: Prognostic and therapeutic roles of SETD2 in cutaneous melanoma
Source: Aging (Albany NY). 2024 Jun 5;16(11):9692–708. doi: 10.18632/aging.205894 (PMC11210245; doi:10.18632/aging.205894)
Supplement: Supplementary Table 8 [file aging-16-205894-s009.xlsx]

## Sheet: Supplemetary Table 8
Supplementary Table 8. The TIDE score and immune signature of TCGA-SKCM samples.
Genes	No benefits	Responder	TIDE	IFNG	MSI Expr Sig	Merck18	CD274	CD8	CTL.flag	Dysfunction	Exclusion	MDSC	CAF	TAM M2
TCGA-ER-A19O-06	FALSE	FALSE	3.21	0.33	0.16	1.88	0.39	1.64	TRUE	3.21	-1.82	-0.24	0.03	-0.05
TCGA-EE-A29W-06	TRUE	FALSE	3.12	-2.78	0.07	-1.87	-2.48	-1.62	FALSE	-0.39	3.12	0.18	0.21	0.08
TCGA-WE-AAA4-06	FALSE	FALSE	3.08	2.81	0.56	3.21	2.41	4.08	TRUE	3.08	-2.12	-0.19	-0.02	-0.1
TCGA-EE-A3JH-06	FALSE	FALSE	3.03	2.33	0.38	2.4	2.08	3.13	TRUE	3.03	-3.35	-0.31	-0.11	-0.07
TCGA-EE-A17Y-06	TRUE	FALSE	3.02	-2.11	0.22	-1.86	-1.86	-1.81	FALSE	-0.78	3.02	0.25	0.18	0.02
TCGA-FS-A1ZC-06	TRUE	FALSE	2.86	-3.1	0.23	-2.65	-2.32	-2.3	FALSE	-1.12	2.86	0.27	0.08	0.07
TCGA-Z2-AA3V-06	FALSE	FALSE	2.85	1.2	0.42	2.55	1.14	2.41	TRUE	2.85	-1.66	-0.15	-0.07	-0.02
TCGA-EB-A6L9-06	FALSE	FALSE	2.82	0.95	0.31	1.35	0.55	2.12	TRUE	2.82	-1.97	-0.16	-0.11	-0.02
TCGA-D9-A6E9-06	FALSE	FALSE	2.78	2.88	0.62	3.3	3.05	4.53	TRUE	2.78	-2.86	-0.2	-0.12	-0.1
TCGA-D3-A51F-06	FALSE	FALSE	2.73	3.36	0.43	3.08	1.91	4.48	TRUE	2.73	-2.73	-0.26	-0.01	-0.13
TCGA-EE-A3AG-06	TRUE	FALSE	2.68	-2.3	0.34	-2.17	-2.19	-0.05	FALSE	-0.81	2.68	0.29	0.04	0.06
TCGA-EE-A29R-06	TRUE	FALSE	2.61	-1.63	0.32	-1.41	-1.44	-1.48	FALSE	-1.26	2.61	0.18	0.19	0.03
TCGA-EE-A2GK-06	FALSE	FALSE	2.57	0.89	0.23	1.24	0.28	2.16	TRUE	2.57	-3.01	-0.24	-0.2	0
TCGA-EE-A183-06	FALSE	FALSE	2.55	-0.35	0.26	0.76	0.04	1.1	TRUE	2.55	-0.99	-0.09	-0.07	0.02
TCGA-D3-A51R-06	TRUE	FALSE	2.52	-3.28	0.11	-2.92	-2.46	-2.72	FALSE	-1.03	2.52	0.24	0.03	0.1
TCGA-ER-A19P-06	FALSE	FALSE	2.51	2.7	0.29	2.3	1.36	3.55	TRUE	2.51	-3.32	-0.28	-0.15	-0.07
TCGA-FR-A7UA-06	FALSE	FALSE	2.51	3.6	0.84	3.28	3.08	4.86	TRUE	2.51	-4.44	-0.35	-0.16	-0.15
TCGA-DA-A1IB-06	FALSE	FALSE	2.48	2.26	0.5	2.04	1.59	2.58	TRUE	2.48	-3.45	-0.29	-0.16	-0.06
TCGA-D3-A1Q4-06	TRUE	FALSE	2.44	-1.2	0.13	-0.88	-1.4	-1.39	FALSE	0.08	2.44	0.07	0.24	0.06
TCGA-EE-A29A-06	TRUE	FALSE	2.41	-2.11	0.45	-1.68	-0.32	-2.14	FALSE	-0.41	2.41	0.14	0.18	0.05
TCGA-D3-A1Q5-06	TRUE	FALSE	2.39	-2.87	0.05	-2.37	-2.25	-1.32	FALSE	-0.17	2.39	0.14	0.17	0.04
TCGA-QB-A6FS-06	FALSE	FALSE	2.39	0.86	0.43	1.9	0.31	2.6	TRUE	2.39	-1.07	-0.08	-0.06	-0.01
TCGA-D3-A2J9-06	FALSE	FALSE	2.38	3.1	0.33	2.76	1.74	4.17	TRUE	2.38	-3.47	-0.26	-0.15	-0.1
TCGA-D3-A3CB-06	FALSE	FALSE	2.38	1.71	0.38	2.37	4.66	3.44	TRUE	2.38	-2.97	-0.27	-0.11	-0.05
TCGA-D3-A3MO-06	TRUE	FALSE	2.37	-3.35	0.17	-2.58	-2.33	-2.66	FALSE	-0.95	2.37	0.18	0.13	0.05
TCGA-FS-A1ZD-06	TRUE	FALSE	2.35	-2.88	0.15	-1.87	-2.08	-0.34	FALSE	-0.47	2.35	0.11	0.18	0.08
TCGA-EE-A2M8-06	FALSE	FALSE	2.35	3.4	0.48	2.88	2.01	4.08	TRUE	2.35	-3.3	-0.33	-0.05	-0.11
TCGA-EB-A4OZ-01	FALSE	FALSE	2.33	1.37	0.53	1.63	0.31	2.3	TRUE	2.33	-1.07	-0.07	-0.07	-0.02
TCGA-ER-A1A1-06	FALSE	FALSE	2.33	0.56	0.36	1.06	0.68	0.89	TRUE	2.33	-3.34	-0.25	-0.24	0
TCGA-BF-AAP0-06	FALSE	FALSE	2.31	2.36	0.43	1.95	1.24	2.78	TRUE	2.31	-1.65	-0.18	-0.01	-0.06
TCGA-BF-A3DN-01	TRUE	FALSE	2.29	-1.54	0.15	-1.37	-0.38	-1.79	FALSE	-1.13	2.29	0.1	0.23	0.02
TCGA-D3-A51H-06	FALSE	FALSE	2.27	1.54	0.43	1.37	0.36	1.1	TRUE	2.27	-3.38	-0.23	-0.24	-0.04
TCGA-BF-AAP7-01	FALSE	FALSE	2.25	1.35	0.45	1.74	0.81	2.4	TRUE	2.25	-0.83	-0.09	-0.01	-0.03
TCGA-D3-A51G-06	FALSE	FALSE	2.24	0.67	0.17	0.03	-0.37	0.51	FALSE	-0.63	2.24	0.21	0.14	-0.01
TCGA-D3-A8GB-06	FALSE	FALSE	2.21	1.8	0.53	1.34	0.09	2.06	TRUE	2.21	-1.53	-0.18	-0.01	-0.05
TCGA-FS-A4F8-06	FALSE	FALSE	2.19	0.67	0.13	0.76	-0.05	1.64	TRUE	2.19	-1.48	-0.16	-0.05	0
TCGA-EE-A2ME-06	FALSE	FALSE	2.19	2.86	0.4	2.25	1.63	3.4	TRUE	2.19	-2.83	-0.29	-0.07	-0.06
TCGA-D3-A1Q8-06	TRUE	FALSE	2.18	-1.27	0.04	-0.77	-1.48	-0.93	FALSE	0.37	2.18	0.04	0.26	0.04
TCGA-D3-A3C6-06	FALSE	FALSE	2.18	-0.79	0.42	-1.69	-1.47	-2.33	FALSE	-1.89	2.18	0.18	0.1	0.04
TCGA-D3-A3MV-06	TRUE	FALSE	2.17	-2.14	0.36	-1.74	-1.61	-1.58	FALSE	-0.73	2.17	0.23	0.05	0.04
TCGA-BF-A1PV-01	TRUE	FALSE	2.16	-2.26	0.87	-1.79	-0.94	-2.15	FALSE	-1.79	2.16	0.16	0.09	0.07
TCGA-D3-A2JB-06	FALSE	FALSE	2.15	1.49	0.43	1.35	0.16	1.6	TRUE	2.15	-2.61	-0.15	-0.21	-0.03
TCGA-ER-A194-01	FALSE	FALSE	2.14	0.18	0.48	1.29	0.25	1.65	TRUE	2.14	-1.24	-0.13	-0.07	0.02
TCGA-WE-A8ZN-06	FALSE	FALSE	2.14	1.09	0.84	1.53	0.81	2.21	TRUE	2.14	-1.06	-0.11	-0.04	0
TCGA-EE-A2GO-06	TRUE	FALSE	2.13	-2.26	0.4	-1.77	-0.56	-1.93	FALSE	-0.22	2.13	0.18	0.12	0.03
TCGA-EE-A2GT-06	FALSE	FALSE	2.12	-0.43	0.15	0.61	-0.5	0.81	TRUE	2.12	-1.69	-0.16	-0.12	0.04
TCGA-XV-AB01-06	FALSE	FALSE	2.09	-0.55	0.26	0.78	-0.49	0.82	TRUE	2.09	-0.39	-0.08	0.01	0.02
TCGA-FS-A1ZS-06	TRUE	FALSE	2.09	-1.49	0.27	-1.13	-0.63	-1.7	FALSE	0.04	2.09	0.13	0.21	-0.02
TCGA-DA-A3F8-06	FALSE	FALSE	2.08	3.36	0.8	2.97	3.23	4.06	TRUE	2.08	-3.23	-0.24	-0.09	-0.15
TCGA-ER-A42K-06	TRUE	FALSE	2.08	-1.43	0.25	-1.44	-1.23	-1.99	FALSE	-1	2.08	0.16	0.14	0.01
TCGA-EE-A2A1-06	FALSE	FALSE	2.07	1.49	0.1	1.49	1.18	1.3	TRUE	2.07	-0.88	-0.19	0.09	-0.01
TCGA-DA-A1HY-06	TRUE	FALSE	2.06	-1.48	0.44	-1.48	0.23	-1.82	FALSE	-0.31	2.06	0.14	0.21	-0.04
TCGA-D3-A3C8-06	FALSE	FALSE	2.06	4.55	0.81	3.63	3.34	5.07	TRUE	2.06	-2.59	-0.17	-0.09	-0.13
TCGA-XV-AAZY-01	FALSE	FALSE	2.05	-0.31	0.73	0.72	0.13	1.07	TRUE	2.05	-0.69	-0.06	-0.06	0.02
TCGA-DA-A1I7-06	FALSE	FALSE	2.02	-0.16	0.1	-0.2	-1.06	-0.22	FALSE	0.26	2.02	0.14	0.21	-0.04
TCGA-BF-A1PX-01	FALSE	FALSE	2.02	1.74	0.56	1.7	1.44	2.87	TRUE	2.02	-1.1	-0.11	-0.03	-0.02
TCGA-EB-A3XD-01	FALSE	FALSE	2.02	0.22	0.51	0.67	0.07	0.98	TRUE	2.02	-0.63	-0.12	0.01	0.03
TCGA-GF-A6C9-06	FALSE	FALSE	2.01	1.82	0.58	1.8	0.22	0.87	TRUE	2.01	-1.43	-0.14	-0.02	-0.05
TCGA-YG-AA3N-01	FALSE	FALSE	2.01	0.83	0.57	1.74	0.5	3.25	TRUE	2.01	-1.84	-0.14	-0.12	-0.02
TCGA-WE-A8ZQ-06	TRUE	FALSE	2	-2.9	0.12	-2.59	-2.01	-2.82	FALSE	-0.89	2	0.13	0.1	0.06
TCGA-EE-A3JB-06	FALSE	FALSE	1.98	0.09	0.13	-0.21	-0.03	-1.2	FALSE	-0.04	1.98	0.19	0.13	-0.01
TCGA-FR-A8YE-06	FALSE	FALSE	1.97	0.21	0.17	0.45	0.32	0.47	TRUE	1.97	-1.71	-0.19	-0.04	-0.02
TCGA-HR-A2OH-06	FALSE	FALSE	1.97	3.9	0.72	3.17	2.76	4.25	TRUE	1.97	-4.09	-0.26	-0.19	-0.15
TCGA-D3-A3BZ-06	FALSE	FALSE	1.96	1.39	0.22	1.26	0.66	1.81	TRUE	1.96	-0.05	-0.1	0.16	-0.06
TCGA-BF-A5EO-01	FALSE	FALSE	1.95	-0.36	0.34	0.44	-0.02	0.56	TRUE	1.95	0.19	0.03	0.02	-0.02
TCGA-BF-A1PU-01	TRUE	FALSE	1.94	-2.9	0.36	-1.94	-1.31	-2.12	FALSE	-0.25	1.94	0.12	0.11	0.07
TCGA-FR-A69P-06	TRUE	FALSE	1.93	-1.37	0.18	-1.31	-1.5	-1.28	FALSE	-1.4	1.93	0.11	0.13	0.06
TCGA-GF-A4EO-06	FALSE	FALSE	1.92	2.72	0.7	2.21	1.95	3.15	TRUE	1.92	-3.33	-0.23	-0.17	-0.1
TCGA-EE-A2GE-06	FALSE	FALSE	1.92	2.03	0.14	1.85	1.14	2.62	TRUE	1.92	-0.35	-0.1	0.12	-0.06
TCGA-D9-A3Z3-06	FALSE	FALSE	1.92	0.54	0.36	0.75	0.49	0.43	TRUE	1.92	-0.99	-0.12	-0.02	0
TCGA-EE-A29X-06	FALSE	FALSE	1.91	0.28	0.31	1.01	1.28	0.63	TRUE	1.91	-0.67	-0.06	0.02	-0.04
TCGA-EE-A2A5-06	TRUE	FALSE	1.91	-1.78	0.19	-1.49	-1.06	-1.74	FALSE	-1.14	1.91	0.08	0.1	0.11
TCGA-ER-A19A-06	FALSE	FALSE	1.9	2.79	0.35	2.29	1.95	2.22	TRUE	1.9	-1.39	-0.2	0.11	-0.1
TCGA-EB-A5SG-06	FALSE	FALSE	1.9	3.83	0.92	2.95	2.28	4.01	TRUE	1.9	-3.35	-0.24	-0.14	-0.11
TCGA-EB-A4IS-01	FALSE	FALSE	1.89	1.65	0.24	1.28	0.93	1.86	TRUE	1.89	-1.03	-0.11	0.03	-0.07
TCGA-ER-A2NB-01	FALSE	FALSE	1.88	-0.09	0.89	0.98	0.27	1.65	TRUE	1.88	-1.17	-0.1	-0.07	-0.01
TCGA-EE-A20H-06	TRUE	FALSE	1.87	-1.22	0.38	-1.45	-1.91	-1.58	FALSE	-0.94	1.87	0.18	0.01	0.07
TCGA-ER-A19N-06	FALSE	FALSE	1.86	1.32	0.48	1.58	0.87	1.99	TRUE	1.86	-1.86	-0.22	0.02	-0.06
TCGA-BF-AAP6-01	TRUE	FALSE	1.85	-2	0.36	-1.64	-1.25	-2.24	FALSE	-1.08	1.85	0.14	0.08	0.05
TCGA-YD-A89C-06	TRUE	FALSE	1.85	-2.2	0.41	-1.84	-1.92	-1.85	FALSE	-1.32	1.85	0.18	0.01	0.09
TCGA-D3-A8GD-06	FALSE	FALSE	1.84	2.35	0.53	2.1	1.2	2.28	TRUE	1.84	-2.95	-0.13	-0.23	-0.09
TCGA-D3-A2J8-06	FALSE	FALSE	1.83	2.85	0.57	2.5	3.46	2.77	TRUE	1.83	-0.78	-0.01	-0.02	-0.09
TCGA-BF-A5EP-01	TRUE	FALSE	1.83	-1.87	0.62	-1.5	-0.76	-1.3	FALSE	-0.42	1.83	0.16	0.08	0.04
TCGA-EE-A3AH-06	TRUE	FALSE	1.81	-1.87	0.3	-1.82	-0.98	-1.99	FALSE	-1.03	1.81	0.09	0.12	0.05
TCGA-ER-A19S-06	FALSE	FALSE	1.8	3.99	0.7	3.05	2.14	4.24	TRUE	1.8	-3.76	-0.23	-0.18	-0.14
TCGA-EB-A42Z-01	FALSE	FALSE	1.79	-0.23	0.43	-0.21	-0.42	-0.54	FALSE	-0.23	1.79	0.08	0.15	0.04
TCGA-D9-A1X3-06	TRUE	FALSE	1.78	-3.09	0.57	-2.19	-1.44	-2.64	FALSE	-1.42	1.78	0.09	0.11	0.07
TCGA-FW-A5DY-06	FALSE	FALSE	1.75	0.29	0.5	0.67	-0.2	1.12	TRUE	1.75	-2.02	-0.16	-0.17	0.02
TCGA-ER-A2NH-06	FALSE	FALSE	1.75	3.01	0.34	2.62	1.92	3.75	TRUE	1.75	-1.48	-0.12	-0.01	-0.09
TCGA-EE-A2MG-06	FALSE	FALSE	1.75	0.81	0.12	0.92	0.35	1.63	TRUE	1.75	-1.14	-0.16	0.01	-0.02
TCGA-FS-A1ZF-06	TRUE	FALSE	1.74	-1.41	0.44	-1.11	-0.98	-0.84	FALSE	-0.7	1.74	0.1	0.06	0.09
TCGA-BF-A3DM-01	TRUE	FALSE	1.74	-1.39	0.7	-1.59	-0.94	-1.94	FALSE	-0.7	1.74	0.16	0.09	0.01
TCGA-EE-A2MU-06	FALSE	FALSE	1.74	2.56	0.52	2.04	1.97	2.03	TRUE	1.74	-1.19	-0.12	0.01	-0.08
TCGA-GF-A769-01	TRUE	FALSE	1.74	-2.02	0.71	-1.8	-0.32	-1.93	FALSE	-1.28	1.74	0.18	0.03	0.06
TCGA-EB-A82C-01	TRUE	FALSE	1.73	-1.34	0.49	-1.36	-1.18	-1.98	FALSE	-1.25	1.73	0.14	0.05	0.06
TCGA-DA-A3F5-06	TRUE	FALSE	1.7	-2	0.49	-1.1	-0.75	-0.88	FALSE	-0.21	1.7	0.23	0.06	-0.03
TCGA-W3-A828-06	TRUE	FALSE	1.7	-1.19	0.15	-0.85	-0.94	-1.79	FALSE	0.65	1.7	-0.04	0.28	0.03
TCGA-GN-A265-06	FALSE	FALSE	1.69	1.77	0.32	1.18	1	1	TRUE	1.69	-0.03	-0.03	0.1	-0.07
TCGA-D3-A3MR-06	FALSE	FALSE	1.65	1.79	0.47	1.53	1.09	2.67	TRUE	1.65	-1.72	-0.13	-0.06	-0.06
TCGA-XV-A9W5-01	FALSE	FALSE	1.65	-0.36	0.34	-0.22	-0.53	-0.44	FALSE	0.18	1.65	0.14	0.09	0.01
TCGA-ER-A19E-06	FALSE	FALSE	1.65	-0.7	0.08	-0.84	-1.31	-1.09	FALSE	-0.78	1.65	0.13	0.07	0.05
TCGA-ER-A2NC-06	FALSE	FALSE	1.65	-0.9	0.04	-0.31	1.39	-0.69	FALSE	0.7	1.65	0.03	0.2	0.02
TCGA-DA-A95V-06	FALSE	FALSE	1.64	1.03	0.79	1.56	2.48	1.8	TRUE	1.64	-1.42	-0.11	-0.09	-0.01
TCGA-FS-A4FB-06	TRUE	FALSE	1.63	-2.59	0.74	-1.98	-1.9	-2.28	FALSE	-1.36	1.63	0.06	0.08	0.1
TCGA-D3-A2JE-06	TRUE	FALSE	1.61	-1.83	0.62	-1.78	-1.89	-1.87	FALSE	-1.93	1.61	0.18	-0.05	0.1
TCGA-WE-A8ZM-06	TRUE	FALSE	1.61	-3.56	0.13	-2.37	-2.07	-1.19	FALSE	-0.29	1.61	0.06	0.1	0.09
TCGA-FR-A728-01	FALSE	FALSE	1.6	1.52	0.72	1.21	0.91	1.77	TRUE	1.6	-0.91	-0.05	-0.03	-0.06
TCGA-D3-A8GQ-06	TRUE	FALSE	1.58	-1.15	0.24	-1.05	-1.27	-0.67	FALSE	0.13	1.58	0.15	0.04	0.04
TCGA-ER-A19T-01	TRUE	FALSE	1.58	-3.14	0.29	-2.31	-1.97	-2.03	FALSE	-0.72	1.58	0.1	0.07	0.06
TCGA-EE-A2GH-06	FALSE	FALSE	1.57	2.26	0.47	1.82	0.83	2.83	TRUE	1.57	-1.25	-0.14	-0.01	-0.04
TCGA-EE-A3JE-06	FALSE	FALSE	1.55	3.22	0.59	2.54	2.78	3.57	TRUE	1.55	-1.67	-0.21	0.05	-0.09
TCGA-FR-A2OS-01	TRUE	FALSE	1.54	-2.34	0.5	-1.8	-1.68	-2.74	FALSE	-1.65	1.54	0.09	0.08	0.07
TCGA-WE-A8K6-06	TRUE	FALSE	1.54	-1.3	0.34	-1.04	-1.19	-1.4	FALSE	0.08	1.54	0.11	0.11	0.01
TCGA-3N-A9WB-06	TRUE	FALSE	1.53	-2.71	0.89	-2.12	-0.63	-2.13	FALSE	-1.39	1.53	0.16	-0.03	0.08
TCGA-ER-A19B-06	TRUE	FALSE	1.52	-1.96	0.37	-1.39	-0.1	-0.65	FALSE	-0.43	1.52	0.09	0.11	0.03
TCGA-W3-AA1W-06	FALSE	FALSE	1.52	3.84	0.77	3.17	2.59	4.23	TRUE	1.52	-3.94	-0.24	-0.23	-0.14
TCGA-D3-A8GV-06	TRUE	FALSE	1.49	-1.53	0.92	-0.94	-0.34	-0.88	FALSE	-0.63	1.49	0.2	-0.02	0.04
TCGA-EE-A2MC-06	FALSE	FALSE	1.48	2.17	0.44	1.86	1.72	2.42	TRUE	1.48	0.06	0.03	0.06	-0.09
TCGA-EB-A85I-01	FALSE	FALSE	1.47	1.31	0.84	1.23	0.94	2.17	TRUE	1.47	-0.28	0	0	-0.05
TCGA-EE-A2GN-06	FALSE	FALSE	1.46	-0.83	0.18	-0.79	-1.17	-1.16	FALSE	-0.35	1.46	0.03	0.12	0.08
TCGA-WE-A8K5-06	FALSE	FALSE	1.45	1.19	0.8	0.43	0.01	0.47	FALSE	-0.71	1.45	0.07	0.1	0.05
TCGA-ER-A199-06	FALSE	FALSE	1.44	1.15	0.21	1.48	0.82	2.42	TRUE	1.44	-2.35	-0.17	-0.16	-0.03
TCGA-GN-A26C-01	FALSE	FALSE	1.42	2.92	0.78	2.64	4.14	2.66	TRUE	1.42	-0.57	-0.07	0.07	-0.08
TCGA-FR-A44A-06	FALSE	FALSE	1.41	3.7	0.56	2.72	2.41	3.18	TRUE	1.41	-2.97	-0.21	-0.08	-0.15
TCGA-FS-A1ZH-06	FALSE	FALSE	1.41	0.78	0.12	0.77	-0.06	1.04	TRUE	1.41	0.98	0.03	0.15	-0.02
TCGA-FS-A1ZK-06	TRUE	FALSE	1.4	-2.65	0.44	-2.27	-1.41	-2.56	FALSE	-1.43	1.4	0.13	0.02	0.07
TCGA-FS-A1YY-06	TRUE	FALSE	1.39	-2.39	0.81	-1.76	-1.26	-1.82	FALSE	-0.75	1.39	0	0.16	0.06
TCGA-FS-A1Z7-06	TRUE	FALSE	1.37	-1.35	0.17	-1.07	-1.42	-1.5	FALSE	0.1	1.37	-0.07	0.27	0.02
TCGA-YD-A9TB-06	FALSE	FALSE	1.37	0.64	0.39	-0.09	-1	-0.33	FALSE	-0.69	1.37	0.01	0.16	0.04
TCGA-LH-A9QB-06	TRUE	FALSE	1.36	-1.66	0.54	-1.51	-0.24	-2.03	FALSE	-0.78	1.36	0.07	0.08	0.05
TCGA-ER-A42H-01	TRUE	FALSE	1.36	-1.92	0.27	-1.71	-1.38	-2.19	FALSE	-1.32	1.36	0.05	0.07	0.09
TCGA-EE-A17Z-06	TRUE	FALSE	1.36	-2.83	0.18	-2.01	-1.59	-1.93	FALSE	-0.94	1.36	0.09	-0.01	0.12
TCGA-FS-A1ZE-06	TRUE	FALSE	1.35	-1.73	0.38	-1.63	-1.91	-1.72	FALSE	-1.55	1.35	0.06	0.05	0.09
TCGA-ER-A195-06	FALSE	FALSE	1.34	1.32	0.17	1.36	0.56	1.62	TRUE	1.34	-0.06	-0.09	0.11	-0.01
TCGA-EB-A4OY-01	TRUE	FALSE	1.34	-1.15	0.61	0.08	-0.26	0.73	TRUE	1.34	-0.93	-0.08	-0.12	0.06
TCGA-D9-A4Z2-01	TRUE	FALSE	1.33	-1.52	0.26	-1.38	-1.26	-1.91	FALSE	-1.01	1.33	0.06	0.09	0.05
TCGA-XV-AAZV-01	FALSE	FALSE	1.33	0.57	0.68	0.72	0	0.47	TRUE	1.33	-0.54	-0.04	-0.02	-0.03
TCGA-GN-A8LN-01	FALSE	FALSE	1.33	-0.69	0.4	-1.03	-0.49	-1.62	FALSE	-0.97	1.33	0.12	0.07	0
TCGA-D3-A8GN-06	FALSE	FALSE	1.32	1.96	0.69	1.41	1.03	1.99	TRUE	1.32	-1.63	-0.11	-0.04	-0.08
TCGA-EE-A29D-06	TRUE	FALSE	1.31	-2.3	0.27	-1.74	-0.89	-2.17	FALSE	-1.1	1.31	0.08	0.06	0.05
TCGA-D9-A1JW-06	FALSE	FALSE	1.31	1.33	0.62	1.53	1.14	1.78	TRUE	1.31	-1.83	-0.14	-0.1	-0.03
TCGA-EE-A29C-06	TRUE	FALSE	1.3	-1.46	0.25	-0.81	-0.74	-1.29	FALSE	0.56	1.3	0.02	0.15	0.04
TCGA-ER-A42L-06	FALSE	FALSE	1.3	1.33	0.66	1.41	0.92	2.33	TRUE	1.3	-1.65	-0.2	-0.01	-0.02
TCGA-EB-A6QZ-01	TRUE	FALSE	1.3	-2.04	0.42	-1.57	-1.33	-1.84	FALSE	-0.32	1.3	0.11	0.03	0.05
TCGA-BF-AAP1-01	TRUE	FALSE	1.3	-2.12	0.31	-1.64	-1.8	-1.97	FALSE	-1.08	1.3	0.12	-0.02	0.09
TCGA-ER-A19D-06	FALSE	FALSE	1.29	0.43	0.03	0.25	-0.91	0.22	FALSE	0.51	1.29	0	0.16	0.04
TCGA-GN-A9SD-06	FALSE	FALSE	1.29	0.64	0.4	0.62	-0.57	1.69	TRUE	1.29	-0.85	-0.1	-0.02	0
TCGA-GF-A2C7-01	TRUE	FALSE	1.29	-2.76	0.39	-1.95	-1.14	-2.29	FALSE	-1.14	1.29	0.06	0.05	0.08
TCGA-ER-A193-06	FALSE	FALSE	1.28	2.57	0.44	1.61	2.22	1.69	TRUE	1.28	-0.49	-0.12	0.13	-0.07
TCGA-EE-A29Q-06	TRUE	FALSE	1.28	-2.42	0.87	-1.82	-0.29	-2.01	FALSE	-1.44	1.28	0.12	0.01	0.06
TCGA-ER-A19J-06	TRUE	FALSE	1.28	-1.45	0.25	-0.87	-0.15	-0.6	FALSE	-0.91	1.28	-0.01	0.16	0.04
TCGA-FS-A1Z3-06	TRUE	FALSE	1.27	-1.5	0.23	-1.44	-1.3	-1.76	FALSE	-1.2	1.27	0.11	0.01	0.07
TCGA-EB-A5UM-01	FALSE	FALSE	1.25	0.59	0.47	0.55	-0.15	1.29	TRUE	1.25	-0.92	-0.04	-0.16	0.05
TCGA-DA-A1I5-06	FALSE	FALSE	1.25	1.21	0.6	1.1	2.08	1.28	TRUE	1.25	-1.25	-0.14	0.01	-0.06
TCGA-EB-A3XE-01	FALSE	FALSE	1.24	0.42	0.56	0.45	-1.02	0.45	TRUE	1.24	0.27	-0.04	0.04	0.04
TCGA-D3-A51J-06	FALSE	FALSE	1.24	1.91	0.56	1.84	1.19	2.83	TRUE	1.24	-1.82	-0.14	-0.08	-0.06
TCGA-D3-A1Q7-06	FALSE	FALSE	1.23	3.37	0.51	2.48	2.16	3.02	TRUE	1.23	-2.16	-0.2	0	-0.12
TCGA-D3-A1QB-06	FALSE	FALSE	1.22	3.14	0.68	2.55	1.46	3.6	TRUE	1.22	-2.55	-0.19	-0.11	-0.08
TCGA-XV-AAZW-01	TRUE	FALSE	1.21	-1.82	0.79	-1.6	-1.08	-1.91	FALSE	-0.1	1.21	0.09	0.04	0.05
TCGA-D3-A51K-06	FALSE	FALSE	1.21	-0.01	0.54	0.89	0.31	1.16	TRUE	1.21	-0.76	-0.01	-0.15	0.04
TCGA-EB-A3Y6-01	FALSE	FALSE	1.21	0.14	0.49	-0.28	-0.07	-0.25	FALSE	-0.83	1.21	0.02	0.12	0.04
TCGA-D3-A8GS-06	FALSE	FALSE	1.2	1.26	0.94	1.24	0.68	1.64	TRUE	1.2	-2.47	-0.08	-0.25	-0.06
TCGA-GN-A4U9-06	FALSE	FALSE	1.2	-0.66	0.02	-1.27	-1.17	-1.66	FALSE	-0.45	1.2	0.14	-0.03	0.07
TCGA-EE-A29E-06	TRUE	FALSE	1.19	-1.23	0.62	-1.55	-1.94	-2.22	FALSE	-1.45	1.19	0.13	0.03	0.01
TCGA-D3-A8GL-06	TRUE	FALSE	1.18	-2.66	0.56	-2.22	-1.23	-2.65	FALSE	-1.97	1.18	0.14	-0.03	0.06
TCGA-EE-A2GR-06	TRUE	FALSE	1.18	-2.06	0.65	-1.98	-2.14	-2.34	FALSE	-2.06	1.18	0.09	0.04	0.05
TCGA-EE-A29P-06	FALSE	FALSE	1.18	3.64	0.52	2.43	1.23	3.18	TRUE	1.18	-2.63	-0.18	-0.11	-0.11
TCGA-ER-A197-06	FALSE	FALSE	1.18	1.6	0.38	1.56	0.15	2.14	TRUE	1.18	-1.42	-0.1	-0.01	-0.09
TCGA-WE-AA9Y-06	TRUE	FALSE	1.17	-2.15	0.37	-0.84	-1.24	-0.64	FALSE	0.8	1.17	-0.05	0.19	0.05
TCGA-GN-A4U5-01	FALSE	FALSE	1.17	2.48	0.75	1.88	2.13	2.15	TRUE	1.17	-0.95	-0.05	-0.04	-0.06
TCGA-FR-A726-01	TRUE	FALSE	1.16	-2.1	0.31	-1.84	-1.38	-2.19	FALSE	-0.76	1.16	0.11	0.03	0.03
TCGA-EB-A44P-01	FALSE	FALSE	1.16	-0.38	0.81	-0.28	1.12	-0.53	FALSE	-0.92	1.16	0.11	0.06	0
TCGA-EE-A2GL-06	FALSE	FALSE	1.16	0.26	0.39	0.63	0.22	1.47	TRUE	1.16	-1.34	-0.13	-0.11	0.04
TCGA-EE-A3J8-06	TRUE	FALSE	1.16	-2.23	0.48	-2.37	-1.59	-2.1	FALSE	-1.79	1.16	0.13	-0.02	0.06
TCGA-D3-A3C7-06	FALSE	FALSE	1.15	0.51	0.27	0.85	-0.67	1.27	TRUE	1.15	-0.2	-0.01	0.04	-0.05
TCGA-D3-A5GL-06	TRUE	FALSE	1.15	-2.14	0.82	-1.54	0.03	-1.53	FALSE	-1.15	1.15	0.1	0.02	0.05
TCGA-EE-A2GP-06	FALSE	FALSE	1.15	-0.55	0.19	-0.5	-0.07	-1.43	FALSE	-0.49	1.15	0.01	0.14	0.03
TCGA-GN-A264-06	TRUE	FALSE	1.14	-1.6	0.23	-1.16	-1.31	-1.58	FALSE	-1.3	1.14	-0.03	0.16	0.04
TCGA-EB-A97M-01	FALSE	FALSE	1.14	0.6	0.81	0.94	0.59	0.6	TRUE	1.14	-0.54	-0.05	-0.03	0.01
TCGA-D3-A8GJ-06	FALSE	FALSE	1.14	3.68	0.79	2.61	2.46	3.49	TRUE	1.14	-2.62	-0.15	-0.11	-0.13
TCGA-ER-A2NG-06	FALSE	FALSE	1.14	2.91	0.77	2.4	2.14	2.97	TRUE	1.14	-2	-0.11	-0.06	-0.14
TCGA-EE-A3J3-06	FALSE	FALSE	1.14	0.1	0.31	-0.04	-0.96	-0.45	FALSE	-0.2	1.14	0.06	0.13	-0.02
TCGA-EE-A2MT-06	FALSE	FALSE	1.12	-0.59	0.73	-0.67	-0.61	-0.71	FALSE	-0.95	1.12	0.16	-0.01	0.01
TCGA-EB-A42Y-01	TRUE	FALSE	1.12	-1.06	0.61	-0.65	-0.49	-1.11	FALSE	-0.25	1.12	0.1	0.07	0
TCGA-ER-A19F-06	FALSE	FALSE	1.11	-0.28	0.67	-0.41	-1.07	-0.65	FALSE	-1.48	1.11	0.12	0.01	0.03
TCGA-D3-A3CF-06	FALSE	FALSE	1.1	0.89	0.61	0.7	0.01	0.72	TRUE	1.1	-1.27	-0.14	-0.04	-0.01
TCGA-EE-A29V-06	TRUE	FALSE	1.09	-2.16	0.46	-1.26	-0.49	-1.63	FALSE	0.34	1.09	0.08	0.05	0.04
TCGA-FR-A729-06	FALSE	FALSE	1.08	1.98	0.25	1.47	0.78	2.32	TRUE	1.08	-1.52	-0.08	-0.11	-0.04
TCGA-D3-A1Q1-06	TRUE	FALSE	1.08	-2.06	0.08	-1.68	-1.09	-1.5	FALSE	-1.42	1.08	0.07	-0.01	0.11
TCGA-FR-A7U9-06	FALSE	FALSE	1.08	1.03	0.82	1.16	2.07	0.3	TRUE	1.08	0.58	0.01	0.12	-0.03
TCGA-D3-A3MU-06	FALSE	FALSE	1.07	0.43	0.32	0.22	0.27	-0.3	FALSE	1.01	1.07	-0.01	0.22	-0.03
TCGA-FS-A4F5-06	FALSE	FALSE	1.07	-0.2	0.57	-1.19	-0.66	-1.75	FALSE	-1.05	1.07	0.07	0.09	0
TCGA-EE-A2GS-06	FALSE	FALSE	1.06	0.75	0.17	-0.06	-0.32	-0.33	FALSE	-0.48	1.06	0.11	0.04	0.01
TCGA-ER-A3PL-06	FALSE	FALSE	1.06	-0.6	0.32	-0.93	-0.08	-0.88	FALSE	-0.94	1.06	0.01	0.17	-0.01
TCGA-WE-A8JZ-06	FALSE	FALSE	1.05	-0.61	0.34	-0.95	-0.7	-0.62	FALSE	-1.03	1.05	0.07	0.05	0.03
TCGA-EE-A29S-06	FALSE	FALSE	1.04	0.12	0.63	0.62	-0.59	0.75	FALSE	-0.58	1.04	0.02	0.1	0.04
TCGA-EB-A5FP-01	TRUE	FALSE	1.03	-2.37	0.56	-2.15	-0.77	-2.18	FALSE	-1.54	1.03	0.15	-0.05	0.05
TCGA-D3-A2JL-06	FALSE	FALSE	1.03	1.94	0.73	1.61	0.82	2.79	TRUE	1.03	-1.5	-0.09	-0.13	-0.01
TCGA-D3-A8GE-06	FALSE	FALSE	1.03	0.81	0.12	0.39	-0.39	0.39	FALSE	1.01	1.03	-0.09	0.25	0.02
TCGA-D3-A2JA-06	FALSE	FALSE	1.03	0.82	0.06	0.55	1.19	0.05	FALSE	0.66	1.03	0.02	0.2	-0.05
TCGA-BF-A1Q0-01	FALSE	FALSE	1.03	1.3	0.55	0.75	2.56	0.03	FALSE	-0.08	1.03	0.14	0.03	-0.01
TCGA-XV-A9VZ-01	TRUE	FALSE	1.02	-2.73	0.5	-2.02	-2.04	-2.36	FALSE	0.3	1.02	0.03	0.05	0.08
TCGA-D3-A8GK-06	TRUE	FALSE	1.01	-2.68	0.73	-1.83	-1.31	-1.53	FALSE	-0.68	1.01	0.15	-0.08	0.08
TCGA-FS-A1ZN-01	TRUE	FALSE	1.01	-1.74	0.66	-1.46	-0.39	-1.86	FALSE	-1.25	1.01	0.07	0.05	0.03
TCGA-EB-A24C-01	FALSE	FALSE	1	-1.96	0.44	-1.8	-1.35	-2.45	FALSE	-1.15	1	0.03	0.11	0.02
TCGA-DA-A1I8-06	FALSE	FALSE	1	-1.94	0.47	-1.65	-1.3	-2.11	FALSE	0.32	1	0.08	0.1	-0.02
TCGA-FS-A1YX-06	FALSE	FALSE	0.99	-1.09	0.3	-0.98	-1.11	-1.23	FALSE	-0.8	0.99	0.01	0.15	-0.01
TCGA-EB-A85J-01	FALSE	FALSE	0.99	1.86	0.66	1.7	0.98	2.54	TRUE	0.99	-2.42	-0.11	-0.21	-0.04
TCGA-EE-A2MJ-06	FALSE	FALSE	0.99	2.29	0.52	1.75	1.2	2.67	TRUE	0.99	-2.88	-0.18	-0.18	-0.07
TCGA-ER-A19Q-06	FALSE	FALSE	0.99	1.42	0.22	1.19	1.22	0.94	TRUE	0.99	-1.25	-0.14	0.04	-0.07
TCGA-EB-A5VU-01	FALSE	FALSE	0.99	-1.47	0.25	-1.6	-1.43	-1.61	FALSE	-1.07	0.99	0.06	0.03	0.05
TCGA-EE-A3AD-06	FALSE	FALSE	0.99	-2.51	0.6	-2.11	-1.2	-2.25	FALSE	-1.77	0.99	0.08	0.05	0.02
TCGA-D3-A1Q6-06	FALSE	FALSE	0.97	-0.5	0.86	-0.86	-0.61	-0.91	FALSE	-0.53	0.97	0.17	0.01	-0.04
TCGA-FS-A4FC-06	FALSE	FALSE	0.95	-0.14	0.78	-0.36	-0.12	-0.6	FALSE	-0.62	0.95	0.02	0.12	0.01
TCGA-ER-A19L-06	FALSE	FALSE	0.95	-1.29	0.4	-1.14	-0.8	-1.71	FALSE	-0.36	0.95	-0.02	0.15	0.03
TCGA-ER-A19W-06	FALSE	FALSE	0.95	3.62	0.67	2.55	2.42	3.37	TRUE	0.95	-2.9	-0.2	-0.14	-0.09
TCGA-EB-A5SE-01	FALSE	FALSE	0.95	-1.2	0.59	-1.09	-0.05	-0.93	FALSE	-1.05	0.95	0.09	0.01	0.05
TCGA-EE-A3JD-06	FALSE	FALSE	0.94	2.6	0.7	1.87	1.55	2.18	TRUE	0.94	-1.82	-0.1	-0.11	-0.06
TCGA-FW-A5DX-01	FALSE	FALSE	0.94	-1.36	0.17	-1.59	-1.16	-1.57	FALSE	-1.53	0.94	0.1	-0.03	0.06
TCGA-WE-A8ZY-06	FALSE	FALSE	0.93	-0.94	0.39	-0.78	0	-1.36	FALSE	-0.85	0.93	0.09	0.03	0.01
TCGA-D3-A2JF-06	FALSE	FALSE	0.92	2.21	0.8	1.56	1.66	1.56	TRUE	0.92	-0.95	-0.03	-0.04	-0.07
TCGA-EB-A4P0-01	FALSE	FALSE	0.91	-0.44	0.64	-0.03	-0.26	-0.03	FALSE	-0.56	0.91	0.02	0.03	0.08
TCGA-BF-AAP4-01	FALSE	FALSE	0.9	1.51	0.6	1.45	0.96	2.25	TRUE	0.9	-0.82	-0.01	-0.06	-0.05
TCGA-EB-A44O-01	FALSE	FALSE	0.9	-1.17	0.73	-1.1	0.29	-1.33	FALSE	-1.71	0.9	0.1	0	0.03
TCGA-EE-A2M7-06	FALSE	FALSE	0.88	-1.21	0.11	-0.53	-1.1	-0.01	FALSE	0.3	0.88	0	0.09	0.04
TCGA-GN-A26A-06	FALSE	FALSE	0.87	1.14	0.36	0.82	0.29	0.32	FALSE	0.56	0.87	0.1	0.13	-0.11
TCGA-EE-A2GD-06	FALSE	FALSE	0.86	-0.74	0.26	-0.42	0.12	-1.55	FALSE	0.04	0.86	-0.09	0.27	-0.04
TCGA-W3-A825-06	FALSE	FALSE	0.86	0.78	0.11	0.61	-0.75	1.46	TRUE	0.86	1.07	0.08	0.1	-0.01
TCGA-D3-A8GI-06	FALSE	FALSE	0.86	-1.29	0.25	-0.68	-0.82	-1.1	FALSE	1.38	0.86	0.02	0.11	0.01
TCGA-BF-A5EQ-01	FALSE	FALSE	0.85	0.54	0.53	0.57	0.12	0.96	TRUE	0.85	-0.25	-0.12	0.08	0.01
TCGA-FS-A1Z4-06	FALSE	FALSE	0.85	1.19	0.36	0.92	0.37	0.51	TRUE	0.85	-1.58	-0.1	-0.1	-0.04
TCGA-FR-A7U8-06	FALSE	FALSE	0.85	-1.28	0.88	-1.28	-1.08	-1.53	FALSE	-0.86	0.85	0.13	-0.07	0.07
TCGA-EE-A2MQ-06	FALSE	FALSE	0.84	-0.3	0.37	-0.47	0.71	-0.47	FALSE	-0.93	0.84	0.05	0.08	0
TCGA-D3-A8GP-06	FALSE	FALSE	0.84	-0.92	0.61	-0.74	-1.01	-0.5	FALSE	-1.65	0.84	0.13	-0.03	0.02
TCGA-D9-A6EC-06	FALSE	FALSE	0.84	-0.57	0.69	-0.95	0.2	-1.92	FALSE	-1.32	0.84	0.1	0.01	0
TCGA-D9-A6EA-06	FALSE	FALSE	0.83	-0.87	0.65	-1.11	-0.63	-1.67	FALSE	-0.9	0.83	0.13	-0.03	0.02
TCGA-BF-A3DL-01	FALSE	FALSE	0.82	-1.28	0.53	-0.37	-0.38	-0.54	FALSE	1.14	0.82	0.05	0.06	0.02
TCGA-FS-A1ZR-06	FALSE	FALSE	0.82	0.26	0.65	-0.2	-0.05	-0.56	FALSE	-0.59	0.82	-0.01	0.09	0.05
TCGA-W3-AA1O-06	FALSE	FALSE	0.81	-1.9	0.9	-1.56	-0.44	-1.74	FALSE	-1.28	0.81	0.08	-0.02	0.06
TCGA-EB-A551-01	FALSE	FALSE	0.81	2.41	0.81	1.84	2.44	2.39	TRUE	0.81	-2.06	-0.14	-0.09	-0.08
TCGA-FS-A1ZU-06	FALSE	FALSE	0.8	-1.96	0.5	-1.98	-1.42	-1.93	FALSE	-1.58	0.8	0.09	-0.06	0.09
TCGA-D3-A2JG-06	FALSE	FALSE	0.8	-1.03	0.84	-0.92	-0.91	-0.72	FALSE	-1.02	0.8	0.08	0.03	0
TCGA-FS-A1ZM-06	FALSE	FALSE	0.79	1.16	0.21	0.99	0.16	1.63	TRUE	0.79	0.2	-0.05	0.13	-0.06
TCGA-D3-A2JO-06	FALSE	FALSE	0.78	2.25	0.43	1.94	1.82	2.52	TRUE	0.78	-1.86	-0.06	-0.13	-0.09
TCGA-EB-A3XC-01	FALSE	FALSE	0.78	-0.16	0.57	-0.61	-1.39	-0.99	FALSE	-0.2	0.78	0.11	-0.02	0.03
TCGA-EE-A185-06	FALSE	FALSE	0.77	-2.86	0.72	-2.21	-1.25	-2.01	FALSE	-0.78	0.77	0.1	-0.05	0.07
TCGA-D3-A2JN-06	FALSE	FALSE	0.77	0.9	0.4	0.84	-0.46	1.7	TRUE	0.77	0.78	0.04	0.08	0
TCGA-HR-A5NC-01	FALSE	FALSE	0.76	-2.09	0.37	-1.56	-1.02	-2.27	FALSE	-0.5	0.76	-0.02	0.08	0.06
TCGA-DA-A1HW-06	FALSE	FALSE	0.76	2.06	0.21	1.46	1.12	2.13	TRUE	0.76	-1.84	-0.11	-0.11	-0.05
TCGA-3N-A9WD-06	FALSE	FALSE	0.76	0.59	0.75	0.17	0.32	0.82	TRUE	0.76	-0.85	-0.07	-0.07	0.01
TCGA-FS-A4FD-06	FALSE	FALSE	0.75	-0.33	0.11	-0.39	-0.42	-0.01	FALSE	-0.92	0.75	0.04	0	0.08
TCGA-EE-A180-06	FALSE	FALSE	0.75	-0.3	0.48	-0.43	0.4	-0.68	FALSE	-0.96	0.75	0.07	0.05	0
TCGA-D3-A3CC-06	FALSE	FALSE	0.73	-1.7	0.38	-1.49	-1.45	-1.89	FALSE	-0.68	0.73	-0.05	0.09	0.08
TCGA-WE-AAA3-06	FALSE	FALSE	0.71	0.7	0.29	1.14	1.01	1.56	TRUE	0.71	-0.64	-0.14	0.04	0.01
TCGA-GN-A26D-06	FALSE	FALSE	0.71	-1.28	0.71	-1.07	-1.36	-1.18	FALSE	-1.36	0.71	0.06	0.01	0.03
TCGA-EB-A82B-01	FALSE	FALSE	0.7	0.78	0.64	0.9	0.9	0.96	TRUE	0.7	-1.11	-0.04	-0.06	-0.07
TCGA-D3-A5GR-06	FALSE	FALSE	0.7	0.96	0.26	0.48	0.49	0.33	TRUE	0.7	0.09	0.01	0.04	-0.04
TCGA-GN-A266-06	FALSE	FALSE	0.69	2.25	0.33	1.58	1.76	1.04	TRUE	0.69	0.36	-0.05	0.17	-0.05
TCGA-D3-A2JH-06	FALSE	FALSE	0.69	2.59	0.47	2.24	1.16	3.94	TRUE	0.69	-1.81	-0.06	-0.15	-0.06
TCGA-DA-A1HV-06	FALSE	FALSE	0.68	2.44	0.43	1.77	0.9	2.02	TRUE	0.68	-2.15	-0.08	-0.15	-0.1
TCGA-EE-A2MH-06	FALSE	FALSE	0.68	0.71	0.41	0.84	-0.48	1.29	TRUE	0.68	-1.42	-0.09	-0.12	-0.01
TCGA-FS-A1ZY-06	FALSE	FALSE	0.67	-2.34	0.16	-1.85	-1.23	-1.52	FALSE	-0.33	0.67	0.05	-0.03	0.09
TCGA-D3-A3CE-06	FALSE	FALSE	0.66	1.38	0.53	1.08	0.28	1.83	TRUE	0.66	-0.83	-0.04	-0.06	-0.01
TCGA-EE-A29N-06	FALSE	FALSE	0.65	0.72	0.66	0.71	1.1	0.7	TRUE	0.65	-0.99	-0.04	-0.07	-0.04
TCGA-EB-A5KH-06	FALSE	FALSE	0.64	-1.79	0.51	-0.92	-1	-1	FALSE	0.61	0.64	0	0.02	0.09
TCGA-EB-A57M-01	FALSE	FALSE	0.63	-1.05	0.11	-0.28	-1.03	-0.89	FALSE	1.66	0.63	-0.04	0.12	0.04
TCGA-HR-A2OG-06	FALSE	FALSE	0.63	0.44	0.38	0.4	0.71	-0.32	FALSE	1.33	0.63	-0.03	0.19	-0.06
TCGA-EE-A3J7-06	FALSE	FALSE	0.62	-0.43	0.59	-0.48	-0.83	0.06	FALSE	-1.29	0.62	0.1	-0.06	0.05
TCGA-D3-A5GO-06	FALSE	FALSE	0.62	2.17	0.72	1.29	0.34	0.88	TRUE	0.62	-0.17	-0.01	0.06	-0.09
TCGA-WE-A8K4-01	FALSE	FALSE	0.62	2.13	0.92	1.63	1.56	3.09	TRUE	0.62	-1.89	-0.08	-0.14	-0.08
TCGA-RP-A693-06	FALSE	FALSE	0.62	1.27	0.64	0.89	0.32	1.07	TRUE	0.62	-1.36	-0.12	-0.03	-0.05
TCGA-D3-A2JC-06	FALSE	FALSE	0.61	1.64	0.57	1.17	0.88	1.18	TRUE	0.61	-0.25	0	0.05	-0.09
TCGA-ER-A2NE-06	FALSE	FALSE	0.61	-3.16	0.39	-2.44	-1.25	-2.57	FALSE	-1.47	0.61	0.13	-0.06	0.02
TCGA-D9-A4Z6-06	FALSE	FALSE	0.6	-1.93	0.15	-1.54	-0.76	-1.01	FALSE	-0.47	0.6	0.05	0.02	0.03
TCGA-EE-A3AB-06	FALSE	FALSE	0.58	-0.79	0.07	-0.24	-1.15	-0.39	FALSE	0.53	0.58	0.04	0.09	-0.03
TCGA-BF-A1PZ-01	FALSE	FALSE	0.58	-0.29	0.67	-0.28	-0.36	-0.37	FALSE	-0.29	0.58	0.12	-0.04	0.01
TCGA-FS-A1ZJ-06	FALSE	FALSE	0.57	-0.25	0.16	-0.32	-1	0.11	FALSE	-0.8	0.57	0.08	-0.07	0.07
TCGA-EE-A29T-06	FALSE	FALSE	0.54	0.87	0.38	1.14	1.2	1.36	TRUE	0.54	-0.84	-0.08	-0.02	-0.03
TCGA-QB-AA9O-06	FALSE	FALSE	0.54	1.3	0.62	1.08	0.31	1.85	TRUE	0.54	-0.81	0.02	-0.14	-0.02
TCGA-GN-A262-06	FALSE	FALSE	0.53	-2.1	0.77	-2.04	-1.42	-2.01	FALSE	-0.87	0.53	0.08	-0.1	0.1
TCGA-ER-A19C-06	FALSE	FALSE	0.52	-1.71	0.59	-1.2	-0.86	-1.56	FALSE	-0.76	0.52	-0.01	0.09	0.02
TCGA-EB-A44Q-06	FALSE	FALSE	0.52	2.2	0.77	1.68	0.95	1.9	TRUE	0.52	-2.62	-0.15	-0.16	-0.08
TCGA-D3-A3C1-06	FALSE	FALSE	0.52	-1.43	0.49	0.05	-0.23	0.13	FALSE	1.37	0.52	-0.02	0.12	-0.01
TCGA-WE-A8K1-06	FALSE	FALSE	0.51	1.48	0.62	1.22	0.96	1.91	TRUE	0.51	-1.45	-0.04	-0.15	-0.04
TCGA-D3-A2JP-06	FALSE	FALSE	0.51	1	0.8	0.89	-0.48	1.41	TRUE	0.51	0.1	-0.01	0.03	-0.01
TCGA-EB-A1NK-01	FALSE	FALSE	0.51	-1.02	0.57	-0.51	-0.64	-0.78	FALSE	0.76	0.51	-0.01	0.05	0.04
TCGA-EE-A20B-06	FALSE	FALSE	0.5	0.31	0.13	0.25	-0.8	0.83	TRUE	0.5	1.59	0.05	0.17	0.02
TCGA-BF-AAOU-01	FALSE	FALSE	0.49	-0.49	0.71	-0.33	0.46	-0.71	FALSE	0.34	0.49	0.03	0.05	-0.02
TCGA-YD-A9TA-06	FALSE	FALSE	0.48	0.78	0.07	0.26	0.23	-0.2	FALSE	0.11	0.48	0.02	0.07	-0.01
TCGA-GN-A268-06	FALSE	FALSE	0.48	-1.47	0.88	-1.3	-0.88	-1.3	FALSE	-1.73	0.48	0.12	-0.11	0.05
TCGA-EE-A3J5-06	FALSE	FALSE	0.48	1.96	0.54	1.32	0.68	1.47	TRUE	0.48	-0.7	-0.07	0.01	-0.04
TCGA-FS-A1ZQ-06	FALSE	FALSE	0.48	-1.21	0.13	-0.43	-0.57	-0.74	FALSE	0.99	0.48	0.03	0.02	0.02
TCGA-EE-A2MP-06	FALSE	FALSE	0.48	0.92	0.46	1.14	0.33	1.44	TRUE	0.48	-0.61	-0.01	-0.08	-0.01
TCGA-FW-A3I3-06	FALSE	FALSE	0.47	-1.75	0.53	-1.56	-0.71	-0.87	FALSE	-0.99	0.47	0.1	-0.06	0.03
TCGA-D3-A3ML-06	FALSE	FALSE	0.46	-1.79	0.8	-1.71	-1.29	-1.62	FALSE	-2.07	0.46	0.1	-0.08	0.05
TCGA-DA-A95X-06	FALSE	FALSE	0.44	0.47	0.67	0	0.85	-0.27	FALSE	-0.88	0.44	0.08	0.03	-0.05
TCGA-FS-A1ZA-06	FALSE	FALSE	0.44	0.56	0.34	0.09	0.02	-0.09	FALSE	-0.16	0.44	0.07	0.01	-0.02
TCGA-EB-A41A-01	FALSE	FALSE	0.44	-0.66	0.73	-0.87	-1.13	-1.12	FALSE	-1.04	0.44	0.05	-0.03	0.04
TCGA-EB-A51B-01	FALSE	FALSE	0.43	1.4	0.78	0.44	0.01	-0.52	FALSE	-1.31	0.43	0.1	-0.04	-0.01
TCGA-ER-A3EV-06	FALSE	FALSE	0.42	-0.28	0.32	0.26	-0.53	1.23	TRUE	0.42	-0.04	0	-0.05	0.04
TCGA-D9-A6EG-06	FALSE	FALSE	0.41	-2.78	0.7	-2.31	-1.52	-2.31	FALSE	-1.03	0.41	0	0.02	0.05
TCGA-D9-A3Z1-06	FALSE	FALSE	0.41	1.44	0.93	1.42	0.61	1.95	TRUE	0.41	-2.62	-0.19	-0.14	-0.06
TCGA-DA-A1I1-06	FALSE	FALSE	0.4	1.87	0.5	1.25	1.32	0.69	TRUE	0.4	-0.67	-0.09	0.12	-0.12
TCGA-W3-AA21-06	FALSE	FALSE	0.39	-0.83	0.88	-0.46	-0.71	0.07	FALSE	-0.67	0.39	0.11	-0.09	0.02
TCGA-EB-A3HV-01	FALSE	FALSE	0.39	-1.7	0.23	-0.63	-0.83	-1.08	FALSE	1.56	0.39	-0.04	0.08	0.03
TCGA-D3-A2J7-06	FALSE	FALSE	0.39	0.9	0.71	0.87	1.43	1.12	TRUE	0.39	-0.16	-0.05	0.1	-0.07
TCGA-ER-A196-01	FALSE	FALSE	0.38	-1.69	0.55	-1.3	0.16	-2.46	FALSE	0.08	0.38	0.02	0.06	-0.01
TCGA-D9-A4Z5-01	FALSE	FALSE	0.38	-1.14	0.33	-0.84	-0.55	-1.54	FALSE	0.24	0.38	-0.05	0.14	-0.02
TCGA-FS-A1ZZ-06	FALSE	FALSE	0.37	-0.7	0.75	-0.86	-0.32	-1.63	FALSE	-1.8	0.37	0.08	-0.04	0.01
TCGA-DA-A3F3-06	FALSE	FALSE	0.36	-0.19	0.64	-0.51	0.45	-0.61	FALSE	-1.88	0.36	0.07	-0.06	0.04
TCGA-GF-A3OT-06	FALSE	FALSE	0.34	1.17	0.56	1.18	4.32	0.73	TRUE	0.34	1.65	0.11	0.2	-0.06
TCGA-W3-AA1V-06	FALSE	FALSE	0.33	-0.22	0.59	0.34	3.56	-0.68	FALSE	-0.16	0.33	0.03	0.05	-0.03
TCGA-3N-A9WC-06	FALSE	FALSE	0.33	2.96	0.65	2.29	2.72	2.73	TRUE	0.33	-1.96	-0.11	-0.07	-0.11
TCGA-EE-A2A6-06	FALSE	FALSE	0.33	1.09	0.46	0.87	0.16	2.02	TRUE	0.33	-1.21	-0.03	-0.1	-0.06
TCGA-EB-A5UN-06	FALSE	FALSE	0.32	-0.91	0.72	-0.63	1.54	-0.54	FALSE	-0.96	0.32	-0.01	0.1	-0.04
TCGA-EE-A3AF-06	FALSE	FALSE	0.31	0.48	0.78	0.58	0.04	0.93	TRUE	0.31	-0.36	-0.04	-0.01	0
TCGA-EE-A2GI-06	FALSE	FALSE	0.31	1.77	0.69	1.39	0.58	2.1	TRUE	0.31	-0.54	0.06	-0.11	-0.05
TCGA-EE-A181-06	FALSE	FALSE	0.31	2.06	0.57	1.45	1.08	1.85	TRUE	0.31	-2.37	-0.1	-0.16	-0.1
TCGA-EE-A2GM-06	FALSE	FALSE	0.31	-0.74	0.35	-0.71	-0.48	-0.12	FALSE	-1.23	0.31	0.01	-0.05	0.09
TCGA-D9-A149-06	FALSE	FALSE	0.31	1.35	0.69	1.32	0.93	1.15	TRUE	0.31	-1.33	-0.09	-0.03	-0.09
TCGA-ER-A3ET-06	FALSE	FALSE	0.3	-0.26	0.54	-0.32	0.55	-1.27	FALSE	0.2	0.3	-0.06	0.15	-0.04
TCGA-EE-A2MI-06	FALSE	FALSE	0.29	1.55	0.51	1.16	0.89	0.93	FALSE	0.24	0.29	-0.04	0.13	-0.05
TCGA-FS-A4F0-06	FALSE	FALSE	0.29	-1.66	0.68	-1.62	0.79	-2.66	FALSE	-1.54	0.29	0.08	-0.05	0.01
TCGA-EB-A5UL-06	FALSE	FALSE	0.27	1.21	0.57	0.72	-0.02	1.36	TRUE	0.27	-1.57	-0.01	-0.2	-0.04
TCGA-FW-A3R5-06	FALSE	FALSE	0.27	0.42	0.82	-0.11	-0.42	-0.62	FALSE	-1.08	0.27	0.01	0.04	-0.01
TCGA-OD-A75X-06	FALSE	FALSE	0.25	0.16	0.5	-0.71	0.07	-1.59	FALSE	-1.61	0.25	0.08	-0.05	0
TCGA-WE-A8ZX-06	FALSE	FALSE	0.25	1.47	0.52	0.91	0.07	1.64	TRUE	0.25	-0.71	0.02	-0.13	0
TCGA-EE-A20I-06	FALSE	FALSE	0.24	0.32	0.8	0.25	0.6	0.31	FALSE	0.15	0.24	-0.01	0.08	-0.03
TCGA-DA-A1IA-06	FALSE	FALSE	0.23	-1.93	0.42	-0.9	0.37	-0.62	FALSE	1.18	0.23	0.04	-0.04	0.04
TCGA-EE-A2MM-06	FALSE	FALSE	0.2	0.05	0.49	-0.36	-0.22	-1.03	FALSE	-0.77	0.2	0.1	-0.06	-0.02
TCGA-EE-A2GB-06	FALSE	FALSE	0.2	-0.29	0.75	-0.76	-0.67	-0.96	FALSE	-0.83	0.2	0.01	-0.01	0.03
TCGA-GN-A4U7-06	FALSE	FALSE	0.19	-2.48	0.83	-1.93	-0.36	-1.43	FALSE	0.06	0.19	0.05	-0.1	0.07
TCGA-EE-A29L-06	FALSE	FALSE	0.19	-2.34	0.82	-2.04	-1.18	-2.08	FALSE	-1.96	0.19	0.1	-0.12	0.04
TCGA-EE-A2M6-06	FALSE	FALSE	0.19	-0.14	0.27	-0.15	-0.3	-0.45	FALSE	-0.77	0.19	0.1	-0.1	0.02
TCGA-EB-A44R-06	FALSE	FALSE	0.18	-0.02	0.16	0.34	-0.87	1.74	FALSE	0.08	0.18	0.02	-0.03	0.05
TCGA-WE-A8ZT-06	FALSE	FALSE	0.18	-1.44	0.95	-1.23	0.9	-1.19	FALSE	-1.45	0.18	0.01	-0.03	0.05
TCGA-DA-A1I2-06	FALSE	FALSE	0.16	1.76	0.5	0.31	-0.06	-0.34	FALSE	-0.72	0.16	0	0.09	-0.06
TCGA-EE-A3AA-06	FALSE	FALSE	0.16	0.94	0.51	0.81	0.09	0.87	TRUE	0.16	-1.02	-0.04	-0.05	-0.06
TCGA-EE-A184-06	FALSE	FALSE	0.16	0.21	0.41	0.56	0.42	1.04	TRUE	0.16	-0.86	-0.03	-0.11	0.01
TCGA-EE-A2M5-06	FALSE	FALSE	0.16	0.6	0.68	0.85	4.34	1.4	TRUE	0.16	0.92	0.17	0	-0.04
TCGA-DA-A1IC-06	FALSE	FALSE	0.15	-0.49	0.43	-0.41	0.42	-0.18	FALSE	-0.14	0.15	-0.04	0.04	0.04
TCGA-EB-A299-01	FALSE	FALSE	0.14	-0.38	0.46	-0.37	-0.71	-0.2	FALSE	1.02	0.14	0.01	0.01	0
TCGA-YG-AA3O-06	FALSE	FALSE	0.13	-0.65	0.52	-0.39	-0.75	0.16	FALSE	-1.07	0.13	-0.01	-0.02	0.05
TCGA-EE-A2MN-06	FALSE	FALSE	0.13	1.7	0.51	1.55	0.62	1.97	TRUE	0.13	-2.18	-0.15	-0.12	-0.05
TCGA-EE-A3J4-06	FALSE	FALSE	0.13	1.16	0.95	0.04	0.58	-0.33	FALSE	-1.02	0.13	0.03	-0.01	0
TCGA-D9-A1JX-06	FALSE	FALSE	0.12	1.04	0.19	1.09	0.49	2.21	TRUE	0.12	-1.01	-0.04	-0.07	-0.05
TCGA-D3-A2JK-06	FALSE	FALSE	0.11	-1.81	0.49	-0.66	-0.71	-0.8	FALSE	1.91	0.11	-0.03	0.01	0.04
TCGA-EB-A3Y7-01	FALSE	FALSE	0.11	-1.93	0.66	-0.74	0.32	-1.12	FALSE	1.36	0.11	0	-0.02	0.04
TCGA-FR-A3YO-06	FALSE	FALSE	0.09	-2.08	0.59	-0.78	-0.27	-1.12	FALSE	1.5	0.09	0	0.02	0
TCGA-D9-A3Z4-01	FALSE	FALSE	0.09	0.89	0.22	0.17	0.17	0.13	FALSE	-0.47	0.09	-0.03	0.05	-0.01
TCGA-EB-A550-01	FALSE	FALSE	0.09	-1.2	0.71	-1.11	0.33	-1.34	FALSE	0.28	0.09	0	0.01	0
TCGA-EB-A4IQ-01	FALSE	FALSE	0.09	-2.56	0.27	-1.58	-0.34	-1.77	FALSE	0.53	0.09	0.02	-0.04	0.03
TCGA-D3-A2J6-06	FALSE	FALSE	0.08	0.98	0.8	0.95	0.11	1.91	TRUE	0.08	-0.44	0.01	-0.03	-0.04
TCGA-D3-A51E-06	FALSE	FALSE	0.08	2.11	0.83	1.38	1.02	1.3	TRUE	0.08	-1.64	-0.02	-0.13	-0.1
TCGA-YG-AA3P-06	FALSE	FALSE	0.08	-0.44	0.93	-0.97	-1.05	-0.93	FALSE	-1.76	0.08	0.05	-0.13	0.09
TCGA-DA-A1I0-06	FALSE	FALSE	0.07	-0.98	0.36	0.47	-0.59	0.5	FALSE	1.83	0.07	-0.02	0	0.04
TCGA-FS-A1ZG-06	FALSE	FALSE	0.05	-1.47	0.67	-1.16	-1.18	-1.62	FALSE	-1.01	0.05	-0.01	-0.05	0.07
TCGA-GN-A8LK-06	FALSE	FALSE	0.05	-2.48	0.84	-1.61	-0.87	-1.18	FALSE	-0.21	0.05	0.05	-0.12	0.07
TCGA-EB-A44N-01	FALSE	FALSE	0.03	-0.16	0.56	-0.35	-0.53	-0.41	FALSE	0.57	0.03	-0.01	0	0.01
TCGA-XV-A9W2-01	FALSE	FALSE	0.01	-0.17	0.92	-1.06	-0.04	-1.44	FALSE	-0.24	0.01	0.05	-0.07	0.01
TCGA-EB-A4XL-01	FALSE	FALSE	0.01	0.71	0.65	-0.01	0.04	0.1	FALSE	0.21	0.01	-0.02	0.02	0
TCGA-D3-A3C3-06	FALSE	FALSE	0	0.33	0.73	0.37	-0.27	0.96	TRUE	0	-0.3	0.08	-0.15	0.01
TCGA-W3-A824-06	FALSE	TRUE	0	2.53	0.98	2.05	2.3	2.33	TRUE	0	-1.49	-0.02	-0.11	-0.1
TCGA-EE-A20C-06	FALSE	TRUE	0	-2.26	0.92	-1.78	0.19	-2	FALSE	-1	0	0.06	-0.08	0.02
TCGA-DA-A95Z-06	FALSE	TRUE	-0.01	-0.19	0.82	-0.47	-0.03	-0.64	FALSE	-1.11	-0.01	0.06	-0.11	0.04
TCGA-GN-A4U8-06	FALSE	TRUE	-0.01	1.77	0.83	1.33	1.3	1.87	TRUE	-0.01	-1.76	-0.06	-0.2	-0.02
TCGA-DA-A1I4-06	FALSE	TRUE	-0.02	-1.05	0.71	-0.68	-0.27	-1.07	FALSE	0.17	-0.02	-0.16	0.15	0.02
TCGA-BF-A9VF-01	FALSE	TRUE	-0.02	-2.27	0.74	-1.26	0	-0.94	FALSE	0.2	-0.02	0.03	-0.1	0.06
TCGA-EB-A24D-01	FALSE	TRUE	-0.03	-0.06	0.74	-0.21	-0.64	-0.85	FALSE	-1.24	-0.03	0.01	-0.05	0.04
TCGA-EE-A2MS-06	FALSE	TRUE	-0.03	-0.23	0.06	0	-0.77	0.34	FALSE	-0.05	-0.03	0.03	-0.04	0.01
TCGA-EB-A3XF-01	FALSE	TRUE	-0.04	1.72	0.63	0.3	1.54	-1.08	FALSE	-0.64	-0.04	0	0.05	-0.07
TCGA-BF-A5ER-01	FALSE	TRUE	-0.06	-1.94	0.65	-0.81	0.01	-0.95	FALSE	1.22	-0.06	0	-0.06	0.05
TCGA-BF-AAP2-01	FALSE	TRUE	-0.06	-0.13	0.78	-0.16	-0.12	-0.05	FALSE	0.01	-0.06	0.05	-0.1	0.03
TCGA-BF-A3DJ-01	FALSE	TRUE	-0.08	-0.1	0.32	-0.04	0.38	-0.76	FALSE	-0.14	-0.08	-0.02	0.05	-0.04
TCGA-BF-A5ES-01	FALSE	TRUE	-0.09	0.12	0.9	0.46	0.25	-0.09	FALSE	0.98	-0.09	-0.08	0.07	0
TCGA-D9-A4Z3-01	FALSE	TRUE	-0.09	-1.17	0.86	-0.87	-1.02	-0.41	FALSE	-0.78	-0.09	0.04	-0.1	0.05
TCGA-EE-A3AE-06	FALSE	TRUE	-0.1	1.53	0.45	0.9	1.05	1.15	TRUE	-0.1	-1.28	-0.04	-0.09	-0.08
TCGA-FS-A1ZB-06	FALSE	TRUE	-0.1	-0.44	0.5	-0.41	-1.02	-1.15	FALSE	1.44	-0.1	-0.1	0.1	0
TCGA-D3-A8GC-06	FALSE	TRUE	-0.1	-0.87	0.7	-0.59	0.63	-1.14	FALSE	-1.38	-0.1	0.04	-0.05	-0.01
TCGA-IH-A3EA-01	FALSE	TRUE	-0.11	-1.33	0.84	-0.34	0.22	-0.7	FALSE	0.46	-0.11	0.03	-0.08	0.03
TCGA-GN-A8LL-06	FALSE	TRUE	-0.11	-1.7	0.38	-0.31	-0.81	-0.04	FALSE	0.85	-0.11	-0.01	-0.04	0.03
TCGA-EB-A41B-01	FALSE	TRUE	-0.12	-0.56	0.81	-0.53	-0.02	0.2	FALSE	-0.65	-0.12	0.06	-0.14	0.05
TCGA-ER-A19H-06	FALSE	TRUE	-0.12	0.95	0.22	0.63	-0.13	1.38	TRUE	-0.12	0.74	0.04	0.05	0.03
TCGA-EE-A29B-06	FALSE	TRUE	-0.12	-1.16	0.63	-0.32	-0.18	-0.82	FALSE	-0.33	-0.12	0.03	-0.13	0.08
TCGA-GN-A4U4-06	FALSE	TRUE	-0.13	-1.11	0.79	-1.05	-0.58	-0.61	FALSE	-1.21	-0.13	0.06	-0.14	0.06
TCGA-EB-A431-01	FALSE	TRUE	-0.15	-0.94	0.82	-1.04	-0.03	-1.45	FALSE	-1.08	-0.15	0.06	-0.09	0
TCGA-D3-A1QA-06	FALSE	TRUE	-0.17	0.02	0.73	0.16	1.82	-0.08	FALSE	-1.38	-0.17	0.04	-0.06	-0.01
TCGA-BF-AAOX-01	FALSE	TRUE	-0.17	-1.66	0.91	-1.09	-0.14	-1	FALSE	-0.24	-0.17	0.02	-0.08	0.04
TCGA-FS-A1ZT-06	FALSE	TRUE	-0.17	1.06	0.17	0.79	1.3	1.43	TRUE	-0.17	-1.15	-0.08	-0.07	-0.02
TCGA-DA-A95Y-06	FALSE	TRUE	-0.17	-1.75	0.77	-1.17	-0.71	-1.25	FALSE	0.15	-0.17	0.03	-0.09	0.03
TCGA-EE-A182-06	FALSE	TRUE	-0.17	-1.14	0.5	0.39	-0.24	0.29	FALSE	2.1	-0.17	-0.06	0.01	0.03
TCGA-FS-A4F4-06	FALSE	TRUE	-0.18	-0.42	0.53	0.59	-0.49	1.07	FALSE	1.95	-0.18	-0.09	0.08	0
TCGA-D3-A1Q9-06	FALSE	TRUE	-0.18	0.18	0.5	0.35	1.26	0.81	TRUE	-0.18	-0.63	-0.04	-0.06	0
TCGA-WE-A8ZR-06	FALSE	TRUE	-0.18	-0.95	0.28	-0.85	-0.88	-0.68	FALSE	-0.9	-0.18	-0.01	-0.04	0.02
TCGA-D3-A51T-06	FALSE	TRUE	-0.18	0.33	0.54	0.2	-0.02	-0.14	FALSE	-0.66	-0.18	0.07	-0.07	-0.04
TCGA-FS-A1ZP-06	FALSE	TRUE	-0.19	-0.26	0.24	-0.04	0.86	0.22	FALSE	-0.32	-0.19	-0.13	0.07	0.05
TCGA-ER-A19M-06	FALSE	TRUE	-0.2	3.21	0.55	2.2	4.17	2.3	TRUE	-0.2	0.16	0.02	0.06	-0.06
TCGA-EB-A6QY-01	FALSE	TRUE	-0.21	-1.31	0.63	-1.23	-0.75	-1.34	FALSE	-0.74	-0.21	0.02	-0.08	0.02
TCGA-GN-A263-01	FALSE	TRUE	-0.21	0.34	0.94	-0.21	0.86	0.01	FALSE	-1.03	-0.21	-0.07	0.04	0
TCGA-EE-A2ML-06	FALSE	TRUE	-0.21	0.68	0.67	1	1.27	1.42	TRUE	-0.21	-0.83	-0.04	-0.03	-0.06
TCGA-EE-A2A0-06	FALSE	TRUE	-0.22	1.3	0.55	0.84	0.73	1.18	FALSE	0.01	-0.22	-0.15	0.12	0.01
TCGA-FS-A1ZW-06	FALSE	TRUE	-0.24	1.98	0.85	1.18	1.44	1.67	TRUE	-0.24	-1.84	-0.08	-0.16	-0.03
TCGA-EE-A29H-06	FALSE	TRUE	-0.24	0	0.61	0.05	0.05	0.02	FALSE	-0.02	-0.24	0.03	-0.07	0.01
TCGA-ER-A19K-01	FALSE	TRUE	-0.24	0.29	0.86	-0.06	0.54	-0.36	FALSE	-0.32	-0.24	-0.02	-0.04	0.02
TCGA-EE-A2GC-06	FALSE	TRUE	-0.25	2.65	0.75	1.7	0.84	2.04	TRUE	-0.25	-1.5	-0.12	-0.02	-0.08
TCGA-FS-A4F9-06	FALSE	TRUE	-0.25	-1.44	0.83	-1.33	-1.07	-1.26	FALSE	-0.96	-0.25	0.02	-0.11	0.05
TCGA-DA-A95W-06	FALSE	TRUE	-0.26	0.07	0.91	0.11	0.52	0.54	FALSE	-0.61	-0.26	0.01	-0.12	0.07
TCGA-FW-A3TV-06	FALSE	TRUE	-0.27	-0.5	0.75	-0.24	-0.49	0.27	FALSE	-0.59	-0.27	-0.08	0.01	0.03
TCGA-EE-A2GJ-06	FALSE	TRUE	-0.28	1.39	0.27	1.17	0.71	1.35	TRUE	-0.28	-0.83	-0.05	-0.05	-0.03
TCGA-EE-A20F-06	FALSE	TRUE	-0.29	1.01	0.69	0.87	0.18	0.99	TRUE	-0.29	-0.64	0.01	-0.08	-0.04
TCGA-D3-A8GM-06	FALSE	TRUE	-0.3	0.76	0.76	0.41	1.08	0.47	TRUE	-0.3	-0.83	-0.04	-0.03	-0.06
TCGA-D3-A5GS-06	FALSE	TRUE	-0.31	1.42	0.59	0.84	0.37	1.08	FALSE	0.36	-0.31	-0.07	0.04	-0.02
TCGA-EB-A3XB-01	FALSE	TRUE	-0.31	-0.4	0.83	0.09	1.08	-0.04	FALSE	-0.48	-0.31	-0.03	-0.03	0.01
TCGA-ER-A2ND-06	FALSE	TRUE	-0.33	-0.12	0.53	-0.19	-0.47	-0.22	FALSE	-0.18	-0.33	0	-0.07	0.01
TCGA-EE-A17X-06	FALSE	TRUE	-0.34	-1.67	0.74	-0.83	-0.27	-0.77	FALSE	0.32	-0.34	0.02	-0.07	0.01
TCGA-D9-A148-06	FALSE	TRUE	-0.34	0.35	0.46	0.16	1.34	0.51	FALSE	0.32	-0.34	-0.02	-0.03	0
TCGA-FR-A8YD-06	FALSE	TRUE	-0.35	-1.22	0.51	-0.44	-0.29	-0.45	FALSE	0.9	-0.35	-0.01	-0.09	0.06
TCGA-EE-A2A2-06	FALSE	TRUE	-0.36	0.32	0.51	-0.12	0.01	0.1	FALSE	-0.88	-0.36	0.08	-0.16	0.01
TCGA-D3-A8GO-06	FALSE	TRUE	-0.37	-0.7	0.28	-0.19	-0.65	0	FALSE	1.18	-0.37	-0.05	-0.02	0.01
TCGA-D3-A2JD-06	FALSE	TRUE	-0.38	-1.06	0.21	0.3	-0.1	0.64	FALSE	2.34	-0.38	-0.06	-0.03	0.04
TCGA-WE-AAA0-06	FALSE	TRUE	-0.4	-0.11	0.77	-0.13	-0.4	-0.59	FALSE	-0.3	-0.4	0.03	-0.09	-0.02
TCGA-EB-A5SF-01	FALSE	TRUE	-0.43	-2.06	0.77	-0.89	-0.45	-0.79	FALSE	1.73	-0.43	-0.06	-0.02	0.03
TCGA-ER-A3ES-06	FALSE	TRUE	-0.43	-2.77	0.95	-1.98	-0.2	-1.43	FALSE	-1.42	-0.43	-0.03	-0.12	0.09
TCGA-GN-A4U3-06	FALSE	TRUE	-0.44	-2	0.74	-1.49	0.14	-1.31	FALSE	-0.89	-0.44	0.02	-0.1	0.02
TCGA-EE-A2GU-06	FALSE	TRUE	-0.45	1.86	0.57	1.66	0.99	2.6	TRUE	-0.45	-1.73	-0.04	-0.21	-0.03
TCGA-GF-A6C8-06	FALSE	TRUE	-0.47	1	0.55	0.51	0.47	0.95	TRUE	-0.47	0.12	0.06	-0.03	-0.02
TCGA-FR-A8YC-06	FALSE	TRUE	-0.48	-0.39	0.81	-0.07	-0.84	0.78	FALSE	-0.7	-0.48	0.05	-0.13	0
TCGA-EE-A29G-06	FALSE	TRUE	-0.5	-0.63	0.73	-0.58	-0.92	-0.9	FALSE	0.63	-0.5	-0.09	-0.01	0.03
TCGA-EB-A6R0-01	FALSE	TRUE	-0.51	2.82	0.77	1.62	2.66	1.7	TRUE	-0.51	-1.07	0.06	-0.14	-0.12
TCGA-EB-A430-01	FALSE	TRUE	-0.51	0.54	0.68	0.32	0.22	0.74	TRUE	-0.51	0.25	0.05	-0.03	0.02
TCGA-EB-A5SH-06	FALSE	TRUE	-0.56	-0.83	0.28	-0.16	-0.45	0.23	FALSE	1.22	-0.56	-0.07	-0.08	0.08
TCGA-Z2-AA3S-06	FALSE	TRUE	-0.57	-0.52	0.7	-0.16	-0.93	0.58	FALSE	-1.32	-0.57	-0.01	-0.15	0.07
TCGA-EE-A3AC-06	FALSE	TRUE	-0.59	1.15	0.39	0.65	0.59	1.14	TRUE	-0.59	-1.17	0.02	-0.14	-0.06
TCGA-WE-A8ZO-06	FALSE	TRUE	-0.59	1.73	0.66	1.03	0.51	1.03	TRUE	-0.59	-1.54	-0.08	-0.09	-0.06
TCGA-EE-A29M-06	FALSE	TRUE	-0.61	1.25	0.76	0.87	1.13	1.31	TRUE	-0.61	-1.08	-0.03	-0.13	-0.01
TCGA-FS-A1Z0-06	FALSE	TRUE	-0.61	2.11	0.23	1.17	0.69	1.57	TRUE	-0.61	-0.88	-0.02	-0.09	-0.02
TCGA-EE-A2MR-06	FALSE	TRUE	-0.63	1.38	0.1	1.52	2.74	2.3	FALSE	1.52	-0.63	-0.09	0.02	-0.02
TCGA-EE-A2MD-06	FALSE	TRUE	-0.66	-0.15	0.41	-0.21	-0.44	-0.26	FALSE	-0.9	-0.66	-0.01	-0.12	0.02
TCGA-BF-AAP8-01	FALSE	TRUE	-0.67	-1.59	0.74	-0.81	0.03	-0.11	FALSE	-0.49	-0.67	-0.1	-0.05	0.05
TCGA-EE-A3JA-06	FALSE	TRUE	-0.68	1.28	0.88	0.63	0.42	1.46	FALSE	-1.28	-0.68	-0.08	-0.03	0.01
TCGA-EE-A2MF-06	FALSE	TRUE	-0.68	0.32	0.75	0.31	-0.13	0.3	FALSE	-1.36	-0.68	-0.02	-0.09	0
TCGA-EE-A2MK-06	FALSE	TRUE	-0.69	2.34	0.47	1.64	1.63	1.86	FALSE	0.29	-0.69	-0.09	0.06	-0.08
TCGA-EE-A3JI-06	FALSE	TRUE	-0.69	-0.61	0.85	-0.68	-0.31	-0.93	FALSE	-1.35	-0.69	0.01	-0.12	0
TCGA-FS-A1YW-06	FALSE	TRUE	-0.71	-1.21	0.74	-0.95	-0.49	-1.24	FALSE	-0.8	-0.71	-0.07	-0.05	0.02
TCGA-RP-A695-06	FALSE	TRUE	-0.74	-0.89	0.84	-0.14	0.6	0.55	FALSE	-0.26	-0.74	-0.03	-0.11	0.03
TCGA-D3-A8GR-06	FALSE	TRUE	-0.78	-2.21	0.88	-1.37	0.81	-1.21	FALSE	0.23	-0.78	-0.05	-0.1	0.03
TCGA-D3-A5GN-06	FALSE	TRUE	-0.8	1.38	0.3	0.56	0.39	0.91	TRUE	-0.8	1.78	0.17	0.1	-0.02
TCGA-D3-A5GT-01	FALSE	TRUE	-0.88	-2.35	0.56	-1.53	-0.61	-1.01	FALSE	0.05	-0.88	-0.06	-0.14	0.07
TCGA-Z2-A8RT-06	FALSE	TRUE	-0.91	0.84	0.52	0.63	0.73	0.3	FALSE	0.52	-0.91	-0.04	-0.08	-0.02
TCGA-FW-A3TU-06	FALSE	TRUE	-0.93	-1	0.61	0.35	-0.2	0.23	FALSE	1.42	-0.93	-0.05	-0.11	0.02
TCGA-GN-A267-06	FALSE	TRUE	-0.97	0.15	0.68	0.36	0.28	1.65	FALSE	-0.09	-0.97	-0.06	-0.12	0.03
TCGA-RP-A690-06	FALSE	TRUE	-0.97	-2.08	0.92	-1.51	-0.75	-1.35	FALSE	-0.47	-0.97	-0.09	-0.08	0.02
TCGA-ER-A2NF-01	FALSE	TRUE	-0.98	0.51	0.66	1.01	0.72	1.41	FALSE	0.72	-0.98	-0.15	-0.01	0.02
TCGA-D3-A51N-06	FALSE	TRUE	-1.05	1.35	0.74	0.44	0.87	-0.31	FALSE	0.65	-1.05	-0.06	-0.01	-0.09
TCGA-D3-A1Q3-06	FALSE	TRUE	-1.07	0.52	0.7	0.68	0.59	0.86	FALSE	-0.3	-1.07	-0.11	-0.04	-0.01
TCGA-D3-A5GU-06	FALSE	TRUE	-1.09	1.11	0.52	0.71	-0.31	1.15	FALSE	-0.63	-1.09	-0.09	-0.1	0.02
TCGA-W3-AA1Q-06	FALSE	TRUE	-1.1	0.97	0.85	0.67	1.27	0.96	FALSE	-0.38	-1.1	-0.09	-0.11	0.03
TCGA-RP-A694-06	FALSE	TRUE	-1.11	0.23	0.72	0.2	-0.67	0.5	TRUE	-1.11	-0.56	-0.03	-0.07	0.02
TCGA-FR-A3R1-01	FALSE	TRUE	-1.14	2.01	0.91	1.15	2.45	0.78	TRUE	-1.14	-0.35	0.03	-0.06	-0.04
TCGA-W3-AA1R-06	FALSE	TRUE	-1.2	0.66	0.43	0.19	0.16	0.48	TRUE	-1.2	0.05	0.15	-0.17	0
TCGA-ER-A198-06	FALSE	TRUE	-1.21	0.58	0.87	0.43	0.47	-0.71	FALSE	-0.79	-1.21	-0.03	-0.13	-0.02
TCGA-EB-A553-01	FALSE	TRUE	-1.25	-0.63	0.4	-0.4	-0.19	0.19	FALSE	1.2	-1.25	-0.09	-0.12	0.03
TCGA-FR-A3YN-06	FALSE	TRUE	-1.28	1.2	0.59	0.77	1.24	1.56	FALSE	-0.23	-1.28	-0.11	-0.06	-0.03
TCGA-DA-A960-01	FALSE	TRUE	-1.34	-2	0.68	-1.31	0.17	-0.69	FALSE	0.98	-1.34	-0.07	-0.17	0.04
TCGA-RP-A6K9-06	FALSE	TRUE	-1.44	0.14	0.69	0.77	0.48	1.58	FALSE	0.51	-1.44	-0.18	-0.04	0.02
TCGA-ER-A19G-06	FALSE	TRUE	-1.7	2.04	0.66	1.3	2.69	0.32	FALSE	-0.08	-1.7	-0.05	-0.09	-0.11
