# Supplementary material for: Prognostic and therapeutic roles of SETD2 in cutaneous melanoma
Source: Aging (Albany NY). 2024 Jun 5;16(11):9692–708. doi: 10.18632/aging.205894 (PMC11210245; doi:10.18632/aging.205894)
Supplement: Supplementary Table 9 [file aging-16-205894-s010.xlsx]

## Sheet: Supplemetary Table 9
Supplementary Table 9. The clinical data and SETD2 mutation status in melanoma samples from MSKCC.
track_name	Drug Type	Age Group at Diagnosis in Years	Overall Survival Status	Cancer Type	Overall Survival (Months)	Sex	TMB (nonsynonymous)	SETD2	SETD2
track_type	CLINICAL	CLINICAL	CLINICAL	CLINICAL	CLINICAL	CLINICAL	CLINICAL	MUTATIONS	STRUCTURAL_VARIANT
P-0008080	CTLA4	>71	0:LIVING	Melanoma	39	Male	46.9785		sv_rec
P-0002305	CTLA4	>71	0:LIVING	Melanoma	14	Male	9.9824	Truncating mutation (putative driver)
P-0003868	Combo	31-50	1:DECEASED	Melanoma	49	Male	13.7021	Truncating mutation (putative driver)
P-0005222	CTLA4	31-50	0:LIVING	Melanoma	69	Male	14.6808	Truncating mutation (putative driver)
P-0008728	Combo	50-60	0:LIVING	Melanoma	25	Female	44.0424	Truncating mutation (putative driver)
P-0009072	Combo	50-60	0:LIVING	Melanoma	24	Male	3.91488	Truncating mutation (putative driver)
P-0012860	PD-1/PDL-1	>71	0:LIVING	Melanoma	10	Male	93.9571	Truncating mutation (putative driver)
P-0013318	PD-1/PDL-1	61-70	0:LIVING	Melanoma	18	Male	6.85104	Truncating mutation (putative driver)
P-0003921	Combo	31-50	0:LIVING	Melanoma	7	Male	14.6808	Missense Mutation (putative driver)
P-0008974	PD-1/PDL-1	>71	1:DECEASED	Melanoma	4	Male	34.2552	Missense Mutation (putative driver)
P-0000686	CTLA4	>71	0:LIVING	Melanoma	80	Male	179.683	Missense Mutation (putative passenger)
P-0001361	CTLA4	61-70	1:DECEASED	Melanoma	42	Male	34.3838	Missense Mutation (putative passenger)
P-0003560	CTLA4	61-70	0:LIVING	Melanoma	41	Male	45.0211	Missense Mutation (putative passenger)
P-0003728	Combo	50-60	0:LIVING	Melanoma	34	Male	47.9573	Missense Mutation (putative passenger)
P-0005053	Combo	50-60	0:LIVING	Melanoma	36	Male	11.7446	Missense Mutation (putative passenger)
P-0005366	PD-1/PDL-1	>71	1:DECEASED	Melanoma	13	Male	147.787	Missense Mutation (putative passenger)
P-0005928	PD-1/PDL-1	61-70	0:LIVING	Melanoma	29	Male	17.617	Missense Mutation (putative passenger)
P-0006541	PD-1/PDL-1	>71	1:DECEASED	Melanoma	47	Male	33.2765	Missense Mutation (putative passenger)
P-0008228	PD-1/PDL-1	>71	0:LIVING	Melanoma	28	Male	43.0637	Missense Mutation (putative passenger)
P-0008997	Combo	50-60	0:LIVING	Melanoma	23	Female	63.6168	Missense Mutation (putative passenger)
P-0009106	Combo	61-70	0:LIVING	Melanoma	31	Female	12.7234	Missense Mutation (putative passenger)
P-0009108	Combo	61-70	0:LIVING	Melanoma	20	Male	38.1701	Missense Mutation (putative passenger)
P-0009245	PD-1/PDL-1	>71	1:DECEASED	Melanoma	11	Male	23.4893	Missense Mutation (putative passenger)
P-0009950	Combo	50-60	0:LIVING	Melanoma	24	Male	69.4891	Missense Mutation (putative passenger)
P-0010937	CTLA4	>71	1:DECEASED	Melanoma	12	Male	36.2126	Missense Mutation (putative passenger)
P-0011047	PD-1/PDL-1	>71	0:LIVING	Melanoma	18	Female	35.2339	Missense Mutation (putative passenger)
P-0013025	CTLA4	50-60	0:LIVING	Melanoma	43	Male	12.7234	Missense Mutation (putative passenger)
P-0013826	PD-1/PDL-1	>71	0:LIVING	Melanoma	1	Male	162.467	Missense Mutation (putative passenger)
P-0015415	Combo	61-70	1:DECEASED	Melanoma	5	Male	77.8228	Missense Mutation (putative passenger)
P-0015521	PD-1/PDL-1	50-60	0:LIVING	Melanoma	15	Male	19.0234	Missense Mutation (putative passenger)
P-0000596	CTLA4	61-70	0:LIVING	Melanoma	42	Male	42.1479
P-0000646	CTLA4	>71	0:LIVING	Melanoma	77	Male	41.0387
P-0000697	Combo	>71	1:DECEASED	Melanoma	32	Female	7.76409
P-0000893	CTLA4	>71	1:DECEASED	Melanoma	16	Male	6.65493
P-0000895	Combo	61-70	1:DECEASED	Melanoma	33	Male	6.65493
P-0000898	CTLA4	50-60	1:DECEASED	Melanoma	21	Male	5.54578
P-0000922	CTLA4	31-50	1:DECEASED	Melanoma	17	Male	4.43662
P-0000958	CTLA4	<30	0:LIVING	Melanoma	35	Female	2.21831
P-0000968	Combo	61-70	0:LIVING	Melanoma	48	Male	3.32747
P-0001029	CTLA4	50-60	1:DECEASED	Melanoma	30	Male	2.21831
P-0001081	CTLA4	50-60	0:LIVING	Melanoma	45	Female	45.4754
P-0001174	CTLA4	>71	0:LIVING	Melanoma	70	Female	1.10916
P-0001179	PD-1/PDL-1	31-50	1:DECEASED	Melanoma	6	Female	3.32747
P-0001485	CTLA4	>71	1:DECEASED	Melanoma	7	Male	74.3134
P-0001560	CTLA4	61-70	0:LIVING	Melanoma	43	Male	24.4014
P-0001603	CTLA4	61-70	0:LIVING	Melanoma	40	Male	22.1831
P-0001646	CTLA4	50-60	1:DECEASED	Melanoma	10	Female	1.10916
P-0001669	CTLA4	50-60	1:DECEASED	Melanoma	5	Male	1.10916
P-0001679	CTLA4	61-70	1:DECEASED	Melanoma	4	Male	5.54578
P-0001706	PD-1/PDL-1	31-50	1:DECEASED	Melanoma	15	Male	22.1831
P-0001710	CTLA4	61-70	0:LIVING	Melanoma	40	Male	16.6373
P-0001756	CTLA4	>71	0:LIVING	Melanoma	40	Male	44.3662
P-0001841	Combo	61-70	1:DECEASED	Melanoma	3	Male	7.76409
P-0001892	CTLA4	>71	1:DECEASED	Melanoma	4	Male	4.43662
P-0002018	Combo	31-50	1:DECEASED	Melanoma	4	Female	4.43662
P-0002019	PD-1/PDL-1	>71	0:LIVING	Melanoma	7	Male	1.10916
P-0002157	PD-1/PDL-1	>71	0:LIVING	Melanoma	0	Female	23.2923
P-0002165	Combo	61-70	0:LIVING	Melanoma	22	Male	2.21831
P-0002182	Combo	61-70	1:DECEASED	Melanoma	22	Female	0
P-0002353	CTLA4	31-50	1:DECEASED	Melanoma	21	Female	18.8556
P-0002380	Combo	50-60	0:LIVING	Melanoma	32	Female	9.9824
P-0002392	CTLA4	50-60	0:LIVING	Melanoma	39	Male	34.3838
P-0002418	CTLA4	<30	0:LIVING	Melanoma	31	Female	3.32747
P-0002422	PD-1/PDL-1	>71	1:DECEASED	Melanoma	6	Female	2.21831
P-0002429	CTLA4	61-70	1:DECEASED	Melanoma	7	Male	4.43662
P-0002456	CTLA4	>71	1:DECEASED	Melanoma	1	Female	7.76409
P-0002490	Combo	61-70	1:DECEASED	Melanoma	41	Male	124.225
P-0002504	CTLA4	61-70	1:DECEASED	Melanoma	28	Male	36.6021
P-0002507	PD-1/PDL-1	31-50	1:DECEASED	Melanoma	10	Female	5.54578
P-0002517	CTLA4	>71	1:DECEASED	Melanoma	19	Male	2.21831
P-0002706	CTLA4	61-70	1:DECEASED	Melanoma	32	Female	17.7465
P-0002765	CTLA4	50-60	1:DECEASED	Melanoma	7	Male	5.54578
P-0002914	Combo	61-70	1:DECEASED	Melanoma	24	Male	24.4014
P-0002993	CTLA4	>71	1:DECEASED	Melanoma	59	Male	4.43662
P-0003069	CTLA4	>71	1:DECEASED	Melanoma	7	Female	34.2552
P-0003197	CTLA4	50-60	1:DECEASED	Melanoma	2	Male	1.95744
P-0003225	Combo	>71	0:LIVING	Melanoma	37	Female	7.82976
P-0003255	Combo	61-70	1:DECEASED	Melanoma	2	Male	9.7872
P-0003359	PD-1/PDL-1	>71	1:DECEASED	Melanoma	1	Male	2.93616
P-0003372	Combo	50-60	0:LIVING	Melanoma	33	Female	3.91488
P-0003401	CTLA4	31-50	1:DECEASED	Melanoma	25	Female	0.97872
P-0003620	CTLA4	50-60	0:LIVING	Melanoma	33	Female	19.5744
P-0003621	Combo	31-50	0:LIVING	Melanoma	35	Female	2.93616
P-0003700	Combo	>71	0:LIVING	Melanoma	36	Male	2.93616
P-0003703	CTLA4	61-70	1:DECEASED	Melanoma	30	Female	0.97872
P-0003742	CTLA4	31-50	1:DECEASED	Melanoma	18	Female	4.8936
P-0003743	Combo	61-70	0:LIVING	Melanoma	51	Male	8.80848
P-0003749	Combo	61-70	0:LIVING	Melanoma	24	Male	4.8936
P-0003757	Combo	61-70	0:LIVING	Melanoma	35	Male	8.80848
P-0003871	PD-1/PDL-1	>71	0:LIVING	Melanoma	4	Male	88.0848
P-0003872	CTLA4	50-60	0:LIVING	Melanoma	65	Female	19.5744
P-0003881	Combo	61-70	0:LIVING	Melanoma	26	Male	4.8936
P-0003899	PD-1/PDL-1	61-70	0:LIVING	Melanoma	3	Male	1.95744
P-0004048	PD-1/PDL-1	50-60	1:DECEASED	Melanoma	41	Male	0.97872
P-0004132	Combo	31-50	1:DECEASED	Melanoma	22	Male	4.8936
P-0004142	CTLA4	61-70	0:LIVING	Melanoma	35	Female	22.5106
P-0004203	Combo	<30	0:LIVING	Melanoma	32	Male	8.80848
P-0004214	PD-1/PDL-1	>71	1:DECEASED	Melanoma	31	Male	33.2765
P-0004253	CTLA4	50-60	1:DECEASED	Melanoma	42	Male	8.80848
P-0004272	PD-1/PDL-1	>71	1:DECEASED	Melanoma	3	Male	9.7872
P-0004348	Combo	31-50	0:LIVING	Melanoma	32	Female	22.5106
P-0004349	PD-1/PDL-1	>71	0:LIVING	Melanoma	35	Female	5.87232
P-0004437	Combo	>71	0:LIVING	Melanoma	35	Female	13.7021
P-0004457	PD-1/PDL-1	>71	1:DECEASED	Melanoma	11	Female	38.1701
P-0004518	CTLA4	61-70	0:LIVING	Melanoma	38	Female	24.468
P-0004527	CTLA4	61-70	1:DECEASED	Melanoma	47	Female	5.87232
P-0004661	Combo	31-50	0:LIVING	Melanoma	32	Male	6.85104
P-0004686	PD-1/PDL-1	50-60	1:DECEASED	Melanoma	5	Female	2.93616
P-0004700	PD-1/PDL-1	50-60	1:DECEASED	Melanoma	32	Male	0
P-0004706	Combo	31-50	1:DECEASED	Melanoma	13	Male	3.91488
P-0004815	PD-1/PDL-1	>71	1:DECEASED	Melanoma	2	Male	3.91488
P-0004832	CTLA4	50-60	1:DECEASED	Melanoma	29	Male	1.95744
P-0004871	CTLA4	61-70	0:LIVING	Melanoma	44	Female	7.82976
P-0004933	Combo	50-60	0:LIVING	Melanoma	33	Male	14.6808
P-0004952	Combo	50-60	0:LIVING	Melanoma	32	Male	36.2126
P-0005039	Combo	>71	1:DECEASED	Melanoma	1	Female	28.3829
P-0005062	Combo	50-60	0:LIVING	Melanoma	31	Female	0.97872
P-0005109	Combo	50-60	0:LIVING	Melanoma	18	Male	16.6382
P-0005118	Combo	>71	0:LIVING	Melanoma	28	Male	16.6382
P-0005121	PD-1/PDL-1	50-60	0:LIVING	Melanoma	11	Female	2.93616
P-0005129	PD-1/PDL-1	>71	1:DECEASED	Melanoma	11	Female	8.80848
P-0005144	CTLA4	50-60	1:DECEASED	Melanoma	40	Male	5.87232
P-0005146	PD-1/PDL-1	>71	0:LIVING	Melanoma	32	Female	8.80848
P-0005157	Combo	<30	1:DECEASED	Melanoma	7	Male	3.91488
P-0005159	PD-1/PDL-1	>71	1:DECEASED	Melanoma	27	Male	99.8294
P-0005180	PD-1/PDL-1	>71	1:DECEASED	Melanoma	11	Male	1.95744
P-0005201	Combo	50-60	0:LIVING	Melanoma	32	Male	8.80848
P-0005228	PD-1/PDL-1	>71	0:LIVING	Melanoma	39	Male	91.9997
P-0005235	Combo	50-60	1:DECEASED	Melanoma	27	Male	0.97872
P-0005260	PD-1/PDL-1	>71	0:LIVING	Melanoma	13	Female	11.7446
P-0005304	Combo	31-50	1:DECEASED	Melanoma	1	Female	1.95744
P-0005352	Combo	61-70	0:LIVING	Melanoma	30	Female	7.82976
P-0005383	PD-1/PDL-1	31-50	0:LIVING	Melanoma	49	Male	21.5318
P-0005421	PD-1/PDL-1	>71	0:LIVING	Melanoma	32	Male	14.6808
P-0005493	Combo	<30	0:LIVING	Melanoma	31	Male	6.85104
P-0005583	Combo	<30	1:DECEASED	Melanoma	1	Female	5.87232
P-0005604	Combo	31-50	0:LIVING	Melanoma	30	Male	4.8936
P-0005655	PD-1/PDL-1	>71	0:LIVING	Melanoma	23	Female	3.91488
P-0005687	PD-1/PDL-1	50-60	1:DECEASED	Melanoma	11	Male	1.95744
P-0005725	PD-1/PDL-1	61-70	0:LIVING	Melanoma	13	Male	25.4467
P-0005733	CTLA4	61-70	1:DECEASED	Melanoma	44	Female	17.617
P-0005971	Combo	<30	1:DECEASED	Melanoma	13	Female	2.93616
P-0006034	Combo	>71	0:LIVING	Melanoma	30	Male	43.0637
P-0006109	CTLA4	50-60	0:LIVING	Melanoma	5	Female	0.97872
P-0006121	CTLA4	>71	0:LIVING	Melanoma	50	Female	2.93616
P-0006155	PD-1/PDL-1	>71	0:LIVING	Melanoma	4	Male	71.4465
P-0006177	PD-1/PDL-1	61-70	1:DECEASED	Melanoma	8	Male	42.0849
P-0006192	Combo	31-50	0:LIVING	Melanoma	30	Female	6.85104
P-0006193	Combo	>71	1:DECEASED	Melanoma	2	Female	8.80848
P-0006339	PD-1/PDL-1	61-70	0:LIVING	Melanoma	1	Female	63.6168
P-0006467	Combo	>71	0:LIVING	Melanoma	29	Male	2.93616
P-0006476	CTLA4	31-50	1:DECEASED	Melanoma	58	Male	11.7446
P-0006488	Combo	61-70	0:LIVING	Melanoma	50	Female	7.82976
P-0006719	PD-1/PDL-1	>71	0:LIVING	Melanoma	28	Female	38.1701
P-0006731	Combo	50-60	0:LIVING	Melanoma	29	Female	14.6808
P-0006773	PD-1/PDL-1	61-70	1:DECEASED	Melanoma	9	Female	4.8936
P-0006845	PD-1/PDL-1	61-70	0:LIVING	Melanoma	29	Male	5.87232
P-0006946	CTLA4	31-50	1:DECEASED	Melanoma	13	Male	2.93616
P-0006952	CTLA4	31-50	0:LIVING	Melanoma	69	Male	17.617
P-0006971	CTLA4	61-70	1:DECEASED	Melanoma	13	Male	1.95744
P-0006973	PD-1/PDL-1	31-50	0:LIVING	Melanoma	61	Male	10.7659
P-0007061	Combo	61-70	0:LIVING	Melanoma	28	Female	1.95744
P-0007142	PD-1/PDL-1	50-60	0:LIVING	Melanoma	28	Male	4.8936
P-0007232	PD-1/PDL-1	50-60	0:LIVING	Melanoma	10	Male	0
P-0007235	Combo	>71	1:DECEASED	Melanoma	9	Female	8.80848
P-0007238	PD-1/PDL-1	<30	0:LIVING	Melanoma	28	Male	1.95744
P-0007281	PD-1/PDL-1	>71	1:DECEASED	Melanoma	6	Male	11.7446
P-0007293	PD-1/PDL-1	>71	0:LIVING	Melanoma	29	Female	5.87232
P-0007517	Combo	>71	1:DECEASED	Melanoma	4	Male	6.85104
P-0007561	Combo	31-50	1:DECEASED	Melanoma	0	Female	33.2765
P-0007736	CTLA4	<30	0:LIVING	Melanoma	71	Female	11.7446
P-0007810	PD-1/PDL-1	61-70	0:LIVING	Melanoma	27	Male	42.0849
P-0007876	PD-1/PDL-1	>71	0:LIVING	Melanoma	12	Female	36.2126
P-0007918	Combo	61-70	1:DECEASED	Melanoma	1	Male	55.787
P-0007927	PD-1/PDL-1	50-60	1:DECEASED	Melanoma	4	Male	0.97872
P-0007970	Combo	50-60	0:LIVING	Melanoma	3	Male	11.7446
P-0008009	Combo	50-60	0:LIVING	Melanoma	24	Male	8.80848
P-0008050	PD-1/PDL-1	50-60	0:LIVING	Melanoma	15	Male	0.97872
P-0008375	Combo	50-60	1:DECEASED	Melanoma	1	Female	9.7872
P-0008403	Combo	31-50	0:LIVING	Melanoma	24	Male	20.5531
P-0008434	PD-1/PDL-1	31-50	0:LIVING	Melanoma	23	Female	50.8934
P-0008445	Combo	31-50	0:LIVING	Melanoma	18	Male	5.87232
P-0008490	PD-1/PDL-1	61-70	0:LIVING	Melanoma	24	Female	5.87232
P-0008492	Combo	<30	1:DECEASED	Melanoma	14	Male	2.93616
P-0008659	PD-1/PDL-1	61-70	1:DECEASED	Melanoma	8	Male	8.80848
P-0008733	PD-1/PDL-1	61-70	1:DECEASED	Melanoma	12	Male	7.82976
P-0008784	PD-1/PDL-1	61-70	1:DECEASED	Melanoma	8	Female	8.80848
P-0008857	PD-1/PDL-1	>71	0:LIVING	Melanoma	24	Female	49.9147
P-0008870	PD-1/PDL-1	>71	0:LIVING	Melanoma	19	Female	0.97872
P-0008904	Combo	<30	1:DECEASED	Melanoma	11	Female	1.95744
P-0008912	Combo	<30	1:DECEASED	Melanoma	1	Female	15.6595
P-0008942	Combo	61-70	0:LIVING	Melanoma	25	Male	33.2765
P-0008946	PD-1/PDL-1	>71	0:LIVING	Melanoma	23	Female	15.6595
P-0008963	CTLA4	31-50	0:LIVING	Melanoma	44	Male	8.80848
P-0008999	Combo	50-60	1:DECEASED	Melanoma	6	Male	10.7659
P-0009019	PD-1/PDL-1	61-70	1:DECEASED	Melanoma	13	Male	2.93616
P-0009074	Combo	61-70	1:DECEASED	Melanoma	14	Female	2.93616
P-0009084	Combo	31-50	1:DECEASED	Melanoma	18	Male	3.91488
P-0009105	CTLA4	61-70	0:LIVING	Melanoma	39	Female	32.2978
P-0009148	CTLA4	31-50	0:LIVING	Melanoma	45	Male	14.6808
P-0009177	Combo	50-60	1:DECEASED	Melanoma	8	Female	5.87232
P-0009180	Combo	31-50	1:DECEASED	Melanoma	4	Female	1.95744
P-0009189	Combo	>71	0:LIVING	Melanoma	24	Male	66.5529
P-0009292	PD-1/PDL-1	50-60	0:LIVING	Melanoma	24	Male	7.82976
P-0009308	Combo	31-50	0:LIVING	Melanoma	22	Female	0.97872
P-0009311	Combo	>71	1:DECEASED	Melanoma	7	Female	31.319
P-0009324	PD-1/PDL-1	>71	0:LIVING	Melanoma	21	Male	22.5106
P-0009345	Combo	50-60	0:LIVING	Melanoma	23	Female	1.95744
P-0009349	PD-1/PDL-1	>71	0:LIVING	Melanoma	21	Female	34.2552
P-0009435	PD-1/PDL-1	61-70	0:LIVING	Melanoma	20	Female	0.97872
P-0009497	CTLA4	61-70	0:LIVING	Melanoma	56	Male	2.93616
P-0009527	Combo	31-50	0:LIVING	Melanoma	19	Female	12.7234
P-0009648	PD-1/PDL-1	50-60	1:DECEASED	Melanoma	15	Male	0.97872
P-0009736	Combo	61-70	0:LIVING	Melanoma	23	Male	13.7021
P-0009747	PD-1/PDL-1	>71	1:DECEASED	Melanoma	19	Male	24.468
P-0009831	PD-1/PDL-1	61-70	1:DECEASED	Melanoma	15	Female	1.95744
P-0009944	Combo	>71	0:LIVING	Melanoma	23	Female	1.95744
P-0010008	Combo	61-70	1:DECEASED	Melanoma	2	Male	4.8936
P-0010111	CTLA4	31-50	0:LIVING	Melanoma	13	Female	1.95744
P-0010115	PD-1/PDL-1	50-60	0:LIVING	Melanoma	23	Male	51.8721
P-0010140	PD-1/PDL-1	31-50	0:LIVING	Melanoma	21	Female	0
P-0010232	Combo	50-60	0:LIVING	Melanoma	25	Male	13.7021
P-0010249	CTLA4	61-70	0:LIVING	Melanoma	28	Male	19.5744
P-0010327	Combo	50-60	0:LIVING	Melanoma	23	Male	0.97872
P-0010340	CTLA4	50-60	0:LIVING	Melanoma	23	Male	51.8721
P-0010495	PD-1/PDL-1	61-70	1:DECEASED	Melanoma	2	Female	3.91488
P-0010614	PD-1/PDL-1	61-70	1:DECEASED	Melanoma	11	Female	1.95744
P-0010644	PD-1/PDL-1	31-50	1:DECEASED	Melanoma	10	Male	0.97872
P-0010670	Combo	>71	0:LIVING	Melanoma	13	Male	12.7234
P-0010737	CTLA4	50-60	1:DECEASED	Melanoma	22	Male	2.93616
P-0010818	PD-1/PDL-1	>71	1:DECEASED	Melanoma	10	Male	15.6595
P-0010847	PD-1/PDL-1	50-60	0:LIVING	Melanoma	22	Male	19.5744
P-0010915	PD-1/PDL-1	61-70	1:DECEASED	Melanoma	13	Female	18.5957
P-0010975	PD-1/PDL-1	61-70	1:DECEASED	Melanoma	0	Female	4.8936
P-0011297	CTLA4	31-50	0:LIVING	Melanoma	66	Male	3.91488
P-0011476	PD-1/PDL-1	31-50	0:LIVING	Melanoma	16	Male	6.85104
P-0012080	CTLA4	50-60	0:LIVING	Melanoma	21	Male	24.468
P-0012282	CTLA4	61-70	0:LIVING	Melanoma	17	Male	9.7872
P-0012315	PD-1/PDL-1	61-70	0:LIVING	Melanoma	18	Female	11.7446
P-0012361	PD-1/PDL-1	>71	1:DECEASED	Melanoma	16	Male	45.0211
P-0012408	PD-1/PDL-1	>71	0:LIVING	Melanoma	17	Male	14.6808
P-0012420	PD-1/PDL-1	>71	0:LIVING	Melanoma	19	Male	10.7659
P-0012446	Combo	31-50	0:LIVING	Melanoma	20	Female	25.4467
P-0012529	PD-1/PDL-1	31-50	1:DECEASED	Melanoma	4	Male	10.7659
P-0012550	PD-1/PDL-1	50-60	0:LIVING	Melanoma	16	Female	57.7445
P-0012551	CTLA4	50-60	0:LIVING	Melanoma	20	Female	10.7659
P-0012780	Combo	50-60	1:DECEASED	Melanoma	11	Female	6.85104
P-0012783	Combo	50-60	0:LIVING	Melanoma	30	Male	17.617
P-0012822	Combo	>71	1:DECEASED	Melanoma	2	Female	0
P-0012856	PD-1/PDL-1	50-60	0:LIVING	Melanoma	18	Male	38.1701
P-0012869	PD-1/PDL-1	<30	1:DECEASED	Melanoma	14	Female	4.8936
P-0012966	PD-1/PDL-1	50-60	1:DECEASED	Melanoma	12	Female	2.93616
P-0012968	Combo	61-70	0:LIVING	Melanoma	19	Male	9.7872
P-0012999	Combo	61-70	1:DECEASED	Melanoma	13	Male	20.5531
P-0013035	CTLA4	31-50	0:LIVING	Melanoma	55	Female	3.91488
P-0013111	PD-1/PDL-1	61-70	0:LIVING	Melanoma	20	Male	19.5744
P-0013200	Combo	61-70	0:LIVING	Melanoma	19	Female	1.95744
P-0013232	PD-1/PDL-1	61-70	0:LIVING	Melanoma	11	Male	46.9785
P-0013274	PD-1/PDL-1	61-70	1:DECEASED	Melanoma	13	Male	6.85104
P-0013309	Combo	>71	0:LIVING	Melanoma	19	Female	0.97872
P-0013313	PD-1/PDL-1	>71	1:DECEASED	Melanoma	11	Male	5.87232
P-0013343	CTLA4	50-60	1:DECEASED	Melanoma	60	Female	19.5744
P-0013383	Combo	>71	0:LIVING	Melanoma	17	Female	45.9998
P-0013389	PD-1/PDL-1	61-70	0:LIVING	Melanoma	18	Male	5.87232
P-0013412	Combo	50-60	0:LIVING	Melanoma	13	Male	3.91488
P-0013413	CTLA4	>71	1:DECEASED	Melanoma	14	Male	24.468
P-0013448	PD-1/PDL-1	>71	0:LIVING	Melanoma	19	Male	12.7234
P-0013451	Combo	50-60	0:LIVING	Melanoma	17	Female	2.93616
P-0013525	CTLA4	61-70	0:LIVING	Melanoma	19	Female	9.7872
P-0013596	PD-1/PDL-1	50-60	1:DECEASED	Melanoma	8	Male	9.7872
P-0013659	PD-1/PDL-1	>71	0:LIVING	Melanoma	17	Male	9.7872
P-0013765	Combo	61-70	0:LIVING	Melanoma	15	Male	6.85104
P-0013845	Combo	61-70	0:LIVING	Melanoma	28	Male	1.95744
P-0013854	Combo	>71	1:DECEASED	Melanoma	33	Male	5.87232
P-0013951	Combo	>71	1:DECEASED	Melanoma	10	Male	1.95744
P-0013956	PD-1/PDL-1	31-50	1:DECEASED	Melanoma	8	Female	5.87232
P-0014124	PD-1/PDL-1	50-60	0:LIVING	Melanoma	13	Female	0
P-0014137	PD-1/PDL-1	>71	0:LIVING	Melanoma	9	Male	24.468
P-0014148	CTLA4	31-50	0:LIVING	Melanoma	80	Female	45.0211
P-0014159	PD-1/PDL-1	50-60	1:DECEASED	Melanoma	2	Male	19.5744
P-0014206	Combo	50-60	0:LIVING	Melanoma	17	Male	22.4822
P-0014229	PD-1/PDL-1	31-50	0:LIVING	Melanoma	16	Female	29.3997
P-0014236	Combo	>71	0:LIVING	Melanoma	17	Male	1.7294
P-0014242	Combo	50-60	0:LIVING	Melanoma	18	Male	25.0762
P-0014379	PD-1/PDL-1	31-50	0:LIVING	Melanoma	17	Male	0.864698
P-0014449	Combo	61-70	1:DECEASED	Melanoma	11	Male	1.7294
P-0014556	PD-1/PDL-1	>71	1:DECEASED	Melanoma	5	Male	16.4293
P-0014666	PD-1/PDL-1	<30	0:LIVING	Melanoma	17	Female	0
P-0014682	PD-1/PDL-1	>71	0:LIVING	Melanoma	16	Male	0.864698
P-0014910	PD-1/PDL-1	>71	0:LIVING	Melanoma	20	Male	32.8585
P-0014966	PD-1/PDL-1	61-70	0:LIVING	Melanoma	17	Male	5.18819
P-0015007	PD-1/PDL-1	<30	0:LIVING	Melanoma	19	Male	6.05289
P-0015010	PD-1/PDL-1	>71	0:LIVING	Melanoma	13	Male	1.7294
P-0015122	PD-1/PDL-1	>71	0:LIVING	Melanoma	2	Female	9.51168
P-0015182	PD-1/PDL-1	>71	0:LIVING	Melanoma	17	Male	3.45879
P-0015257	PD-1/PDL-1	61-70	0:LIVING	Melanoma	14	Female	58.7995
P-0015373	Combo	31-50	0:LIVING	Melanoma	17	Male	29.3997
P-0015407	Combo	61-70	0:LIVING	Melanoma	20	Male	33.7232
P-0015438	Combo	>71	0:LIVING	Melanoma	15	Male	66.5818
P-0015471	PD-1/PDL-1	61-70	0:LIVING	Melanoma	13	Male	1.7294
P-0015511	Combo	31-50	0:LIVING	Melanoma	15	Male	12.9705
P-0015512	PD-1/PDL-1	>71	0:LIVING	Melanoma	16	Male	96.8462
P-0015530	PD-1/PDL-1	50-60	0:LIVING	Melanoma	15	Male	5.18819
P-0015612	Combo	61-70	0:LIVING	Melanoma	15	Female	19.8881
P-0015679	Combo	31-50	0:LIVING	Melanoma	18	Male	5.18819
P-0015697	PD-1/PDL-1	61-70	0:LIVING	Melanoma	14	Female	18.1587
P-0015717	Combo	50-60	0:LIVING	Melanoma	18	Male	1.7294
P-0015791	PD-1/PDL-1	50-60	1:DECEASED	Melanoma	58	Male	6.91758
P-0015830	PD-1/PDL-1	>71	0:LIVING	Melanoma	14	Male	50.1525
P-0015855	PD-1/PDL-1	50-60	0:LIVING	Melanoma	16	Male	10.3764
P-0015977	Combo	31-50	0:LIVING	Melanoma	17	Female	2.59409
P-0015989	PD-1/PDL-1	61-70	0:LIVING	Melanoma	14	Male	2.59409
P-0016177	PD-1/PDL-1	>71	0:LIVING	Melanoma	15	Male	4.32349
P-0016197	PD-1/PDL-1	>71	1:DECEASED	Melanoma	3	Male	26.8056
P-0016276	PD-1/PDL-1	>71	0:LIVING	Melanoma	12	Female	6.91758
P-0016287	PD-1/PDL-1	>71	1:DECEASED	Melanoma	11	Male	5.18819
P-0016506	PD-1/PDL-1	31-50	0:LIVING	Melanoma	14	Female	3.45879
P-0016531	Combo	61-70	0:LIVING	Melanoma	14	Male	3.45879
P-0016648	PD-1/PDL-1	>71	0:LIVING	Melanoma	14	Male	1.7294
P-0016697	PD-1/PDL-1	61-70	0:LIVING	Melanoma	14	Female	0.864698
