# Supplementary material for: Prognostic and therapeutic roles of SETD2 in cutaneous melanoma
Source: Aging (Albany NY). 2024 Jun 5;16(11):9692–708. doi: 10.18632/aging.205894 (PMC11210245; doi:10.18632/aging.205894)
Supplement: Supplementary Table 10 [file aging-16-205894-s011.xlsx]

## Sheet: Supplemetary Table 10
Supplementary Table 10. The SNV neoantigens and SETD2 mutation status in TCGA-SKCM samples.
	Altered	SETD2	SNV Neoantigens			Altered	SETD2	SNV Neoantigens			Altered	SETD2	SNV Neoantigens			Altered	SETD2	SNV Neoantigens
TCGA-A5-A0G2	1	1	11244		TCGA-KK-A5A1	0	0	57		TCGA-FF-8046	0	0	25		TCGA-DX-A6YX	0	0	12
TCGA-AX-A2HC	1	1	7771		TCGA-EB-A42Z	0	0	57		TCGA-L5-A8NU	0	0	25		TCGA-DX-A7ER	0	0	12
TCGA-IB-7651	1	1	7041		TCGA-CF-A9FF	0	0	56		TCGA-LN-A49N	0	0	25		TCGA-DX-A7ES	0	0	12
TCGA-FI-A2D5	1	1	6740		TCGA-E7-A3X6	0	0	56		TCGA-06-5415	0	0	25		TCGA-SI-A71P	0	0	12
TCGA-B5-A3FC	1	1	6529		TCGA-DU-A7T6	0	0	56		TCGA-12-1597	0	0	25		TCGA-EB-A42Y	0	0	12
TCGA-EO-A22R	1	1	6515		TCGA-A2-A25B	0	0	56		TCGA-28-1753	0	0	25		TCGA-EB-A5VU	0	0	12
TCGA-AP-A0LM	1	1	6433		TCGA-A8-A093	0	0	56		TCGA-28-5213	0	0	25		TCGA-2G-AAFJ	0	0	12
TCGA-AG-A002	1	1	6378		TCGA-BH-A1EV	0	0	56		TCGA-06-0211	1	1	25		TCGA-2G-AAG8	0	0	12
TCGA-2W-A8YY	1	1	6318		TCGA-C8-A1HJ	0	0	56		TCGA-12-0618	0	0	25		TCGA-2G-AAG9	0	0	12
TCGA-06-5416	1	1	6243		TCGA-C8-A27B	0	0	56		TCGA-06-0211	1	1	25		TCGA-2G-AAL5	0	0	12
TCGA-B5-A3FA	1	1	6238		TCGA-E2-A574	0	0	56		TCGA-06-0878	0	0	25		TCGA-2G-AALW	0	0	12
TCGA-EO-A22U	1	1	5937		TCGA-DS-A0VK	0	0	56		TCGA-CQ-5325	0	0	25		TCGA-XU-A92Q	0	0	12
TCGA-AX-A1CE	1	1	5678		TCGA-VS-A8EI	0	0	56		TCGA-CV-7429	0	0	25		TCGA-ZB-A962	0	0	12
TCGA-DF-A2KU	1	1	5574		TCGA-VS-A950	0	0	56		TCGA-CV-A45X	0	0	25		TCGA-BJ-A0YZ	0	0	12
TCGA-EO-A3B0	1	1	5352		TCGA-AG-3725	0	0	56		TCGA-D6-6517	0	0	25		TCGA-BJ-A2NA	0	0	12
TCGA-E6-A1LX	1	1	5331		TCGA-EI-6512	0	0	56		TCGA-DQ-5631	0	0	25		TCGA-DJ-A3V5	0	0	12
TCGA-DU-6392	1	1	5122		TCGA-F5-6861	0	0	56		TCGA-A3-3373	0	0	25		TCGA-EL-A3H1	0	0	12
TCGA-AP-A1DK	1	1	4958		TCGA-AA-3664	0	0	56		TCGA-A3-3378	0	0	25		TCGA-ET-A2N4	0	0	12
TCGA-A5-A2K5	1	1	4951		TCGA-FF-A7CX	0	0	56		TCGA-B0-4811	1	1	25		TCGA-FE-A3PC	0	0	12
TCGA-A5-A0G1	1	1	4842		TCGA-VR-A8EU	0	0	56		TCGA-B0-5703	0	0	25		TCGA-A5-A3LO	0	0	12
TCGA-EO-A22X	1	1	4818		TCGA-CN-6016	0	0	56		TCGA-B2-4102	0	0	25		TCGA-AP-A0LJ	0	0	12
TCGA-A5-A1OF	1	1	4804		TCGA-CQ-6228	0	0	56		TCGA-B8-5163	0	0	25		TCGA-AP-A1E4	0	0	12
TCGA-AX-A05Z	1	1	4791		TCGA-CR-6487	0	0	56		TCGA-BP-4992	0	0	25		TCGA-AX-A1CK	0	0	12
TCGA-B5-A0JY	1	1	4625		TCGA-CV-6941	0	0	56		TCGA-CJ-4903	0	0	25		TCGA-AX-A1CN	0	0	12
TCGA-B5-A11E	1	1	4605		TCGA-D6-6823	0	0	56		TCGA-CZ-5456	1	1	25		TCGA-BS-A0TD	0	0	12
TCGA-F5-6814	1	1	4595		TCGA-IQ-A61G	0	0	56		TCGA-A4-8515	0	0	25		TCGA-EO-A2CG	0	0	12
TCGA-CA-6717	1	1	4533		TCGA-AK-3444	0	0	56		TCGA-B3-3925	0	0	25		TCGA-EY-A1GC	0	0	12
TCGA-BS-A0UV	1	1	4486		TCGA-CC-A3M9	0	0	56		TCGA-B3-4103	0	0	25		TCGA-KP-A3W0	0	0	12
TCGA-AX-A0J0	1	1	4471		TCGA-DD-AADN	0	0	56		TCGA-B9-4617	0	0	25		TCGA-YZ-A983	0	0	12
TCGA-AP-A056	1	1	4192		TCGA-DD-AADQ	0	0	56		TCGA-BQ-5877	1	1	25		TCGA-VD-AA8Q	0	0	12
TCGA-AX-A2HD	1	1	4043		TCGA-DD-AAEB	1	1	56		TCGA-BQ-5882	0	0	25		TCGA-OR-A5J1	0	0	11
TCGA-AX-A06F	0	0	4018		TCGA-DD-AAVV	0	0	56		TCGA-HE-A5NF	0	0	25		TCGA-OR-A5JV	0	0	11
TCGA-XK-AAIW	1	1	3881		TCGA-FV-A4ZP	0	0	56		TCGA-IA-A83V	0	0	25		TCGA-OR-A5KU	0	0	11
TCGA-DI-A1BU	1	1	3587		TCGA-G3-A5SJ	0	0	56		TCGA-SX-A7SN	0	0	25		TCGA-OR-A5L8	0	0	11
TCGA-AJ-A3EL	1	1	3492		TCGA-55-6712	0	0	56		TCGA-UZ-A9PP	0	0	25		TCGA-E7-A6MF	0	0	11
TCGA-AP-A059	1	1	3479		TCGA-62-A470	0	0	56		TCGA-Y8-A894	0	0	25		TCGA-XF-AAME	0	0	11
TCGA-AP-A051	1	1	3297		TCGA-85-8052	0	0	56		TCGA-BC-A10Y	0	0	25		TCGA-CS-4942	0	0	11
TCGA-AA-A010	0	0	3289		TCGA-85-8350	0	0	56		TCGA-DD-A4NO	0	0	25		TCGA-CS-6290	0	0	11
TCGA-AJ-A3EK	1	1	3217		TCGA-04-1331	0	0	56		TCGA-WX-AA46	0	0	25		TCGA-DB-A4XC	0	0	11
TCGA-FI-A2D0	0	0	3110		TCGA-23-1122	0	0	56		TCGA-49-AAQV	0	0	25		TCGA-DB-A64P	0	0	11
TCGA-B5-A1MR	1	1	3073		TCGA-29-1770	0	0	56		TCGA-55-A57B	0	0	25		TCGA-DB-A64V	0	0	11
TCGA-BS-A0UF	1	1	2950		TCGA-30-1718	0	0	56		TCGA-86-8075	0	0	25		TCGA-DH-5140	1	1	11
TCGA-D1-A17Q	1	1	2945		TCGA-D7-A6EV	0	0	56		TCGA-J2-A4AE	0	0	25		TCGA-DH-5141	0	0	11
TCGA-AZ-4315	1	1	2786		TCGA-R5-A7O7	0	0	56		TCGA-MQ-A4LP	0	0	25		TCGA-DU-6394	0	0	11
TCGA-B5-A1MX	1	1	2781		TCGA-VQ-A92D	0	0	56		TCGA-04-1348	0	0	25		TCGA-DU-6408	0	0	11
TCGA-AX-A0J1	1	1	2620		TCGA-EC-A1NJ	0	0	56		TCGA-24-1550	0	0	25		TCGA-DU-7009	0	0	11
TCGA-D1-A103	1	1	2468		TCGA-2F-A9KW	0	0	55		TCGA-24-1552	0	0	25		TCGA-DU-7301	0	0	11
TCGA-EY-A215	1	1	2453		TCGA-DK-A3IL	0	0	55		TCGA-29-1696	0	0	25		TCGA-DU-7302	0	0	11
TCGA-BG-A222	0	0	2398		TCGA-DK-AA6T	0	0	55		TCGA-61-1919	0	0	25		TCGA-DU-A5TP	0	0	11
TCGA-EO-A3AV	1	1	2383		TCGA-AN-A0FW	0	0	55		TCGA-61-2104	0	0	25		TCGA-E1-A7YQ	0	0	11
TCGA-AA-A00N	1	1	2350		TCGA-AO-A129	0	0	55		TCGA-F2-A8YN	0	0	25		TCGA-FG-8186	0	0	11
TCGA-EI-6917	1	1	2205		TCGA-D8-A73U	0	0	55		TCGA-IB-7646	0	0	25		TCGA-FG-A6J1	0	0	11
TCGA-CK-4951	1	1	2186		TCGA-E2-A152	0	0	55		TCGA-FC-7961	0	0	25		TCGA-HT-7480	0	0	11
TCGA-AP-A1E0	1	1	2125		TCGA-OL-A5RZ	0	0	55		TCGA-YL-A8SH	0	0	25		TCGA-HT-7690	0	0	11
TCGA-AN-A046	1	1	1995		TCGA-AG-3890	0	0	55		TCGA-YL-A9WH	0	0	25		TCGA-HT-A618	0	0	11
TCGA-AA-3984	1	1	1949		TCGA-EI-6884	0	0	55		TCGA-ZG-A9KY	0	0	25		TCGA-HW-7489	0	0	11
TCGA-EY-A1GI	1	1	1923		TCGA-3L-AA1B	0	0	55		TCGA-3B-A9HQ	0	0	25		TCGA-HW-8319	0	0	11
TCGA-AA-3977	0	0	1864		TCGA-AA-A01I	0	0	55		TCGA-SG-A6Z7	0	0	25		TCGA-HW-8322	0	0	11
TCGA-AC-A23H	1	1	1838		TCGA-CK-5914	0	0	55		TCGA-KB-A93J	0	0	25		TCGA-HW-A5KJ	0	0	11
TCGA-ND-A4WC	1	1	1826		TCGA-DM-A28G	0	0	55		TCGA-VQ-A8PM	0	0	25		TCGA-P5-A5F4	0	0	11
TCGA-DF-A2KN	1	1	1808		TCGA-F4-6569	0	0	55		TCGA-VQ-A927	0	0	25		TCGA-QH-A6CS	0	0	11
TCGA-CA-6718	1	1	1803		TCGA-G4-6315	0	0	55		TCGA-N5-A4RA	0	0	25		TCGA-S9-A6TY	0	0	11
TCGA-BK-A6W3	1	1	1763		TCGA-2H-A9GH	0	0	55		TCGA-N7-A4Y5	0	0	25		TCGA-S9-A6UA	0	0	11
TCGA-FR-A726	0	0	1737		TCGA-BA-5555	0	0	55		TCGA-N8-A4PL	0	0	25		TCGA-S9-A7R8	0	0	11
TCGA-AA-3510	0	0	1721		TCGA-CN-6019	0	0	55		TCGA-AJ-A3BK	0	0	25		TCGA-TM-A84Q	0	0	11
TCGA-EO-A3AY	1	1	1683		TCGA-CV-6940	0	0	55		TCGA-AJ-A3EM	0	0	25		TCGA-TQ-A7RS	0	0	11
TCGA-AJ-A5DW	1	1	1642		TCGA-DD-A116	0	0	55		TCGA-AP-A052	0	0	25		TCGA-VM-A8CE	0	0	11
TCGA-DK-A6AW	0	0	1625		TCGA-DD-AADB	0	0	55		TCGA-AP-A05J	0	0	25		TCGA-A2-A0T2	0	0	11
TCGA-D1-A16X	0	0	1426		TCGA-UB-A7MD	0	0	55		TCGA-AX-A05T	0	0	25		TCGA-A2-A0T7	0	0	11
TCGA-AJ-A3BH	0	0	1407		TCGA-WJ-A86L	0	0	55		TCGA-AX-A2H5	0	0	25		TCGA-A2-A0YE	0	0	11
TCGA-F7-A624	0	0	1402		TCGA-78-7535	0	0	55		TCGA-B5-A1MV	0	0	25		TCGA-A2-A0YL	0	0	11
TCGA-B5-A11N	1	1	1179		TCGA-78-7633	0	0	55		TCGA-B5-A1MY	0	0	25		TCGA-A2-A25D	0	0	11
TCGA-WS-AB45	1	1	1096		TCGA-60-2707	0	0	55		TCGA-B5-A1MZ	0	0	25		TCGA-A7-A0DB	0	0	11
TCGA-FU-A3HZ	0	0	1072		TCGA-66-2781	0	0	55		TCGA-BK-A0CC	0	0	25		TCGA-A8-A08O	0	0	11
TCGA-55-8506	0	0	983		TCGA-94-7557	0	0	55		TCGA-BS-A0T9	0	0	25		TCGA-A8-A09V	1	1	11
TCGA-E6-A1M0	1	1	982		TCGA-LA-A7SW	0	0	55		TCGA-D1-A169	0	0	25		TCGA-AO-A0JA	0	0	11
TCGA-AG-3892	1	1	978		TCGA-61-1737	0	0	55		TCGA-D1-A16R	1	1	25		TCGA-AR-A1AW	0	0	11
TCGA-QC-A7B5	0	0	967		TCGA-FS-A1ZN	0	0	55		TCGA-D1-A1O5	0	0	25		TCGA-AR-A24P	0	0	11
TCGA-AA-3811	0	0	964		TCGA-MX-A666	0	0	55		TCGA-EO-A2CH	0	0	25		TCGA-AR-A24R	0	0	11
TCGA-05-4382	0	0	955		TCGA-VQ-A8PE	0	0	55		TCGA-KP-A3W4	0	0	25		TCGA-B6-A0IA	0	0	11
TCGA-EO-A3KX	1	1	955		TCGA-A8-A0A7	0	0	54		TCGA-E7-A97Q	0	0	24		TCGA-B6-A1KI	0	0	11
TCGA-NH-A5IV	0	0	925		TCGA-C8-A134	0	0	54		TCGA-FD-A5BY	0	0	24		TCGA-BH-A0BD	0	0	11
TCGA-JW-A5VL	0	0	920		TCGA-D8-A1JD	0	0	54		TCGA-GC-A3BM	0	0	24		TCGA-BH-A0DP	0	0	11
TCGA-AA-3492	0	0	915		TCGA-D8-A1JP	0	0	54		TCGA-LT-A8JT	0	0	24		TCGA-BH-A0GY	0	0	11
TCGA-90-A4ED	0	0	904		TCGA-EK-A2RA	0	0	54		TCGA-DU-6399	0	0	24		TCGA-BH-A0HU	0	0	11
TCGA-AA-3864	0	0	902		TCGA-EK-A2RN	0	0	54		TCGA-FG-6692	0	0	24		TCGA-BH-A0W4	0	0	11
TCGA-QF-A5YS	0	0	888		TCGA-VS-A8QC	0	0	54		TCGA-HT-7604	0	0	24		TCGA-BH-A18I	0	0	11
TCGA-FI-A2F4	0	0	883		TCGA-AG-A011	0	0	54		TCGA-HT-8011	0	0	24		TCGA-BH-A1EU	0	0	11
TCGA-HU-A4GQ	0	0	869		TCGA-CI-6622	0	0	54		TCGA-S9-A89Z	0	0	24		TCGA-BH-AB28	0	0	11
TCGA-D1-A167	1	1	859		TCGA-DY-A1DF	0	0	54		TCGA-VW-A8FI	0	0	24		TCGA-D8-A1JE	0	0	11
TCGA-CV-7568	1	1	831		TCGA-4N-A93T	0	0	54		TCGA-A2-A0CQ	0	0	24		TCGA-D8-A1XT	0	0	11
TCGA-EB-A431	0	0	831		TCGA-A6-2677	0	0	54		TCGA-A2-A0EU	0	0	24		TCGA-D8-A1XU	0	0	11
TCGA-G4-6588	0	0	829		TCGA-AA-3530	0	0	54		TCGA-A7-A6VV	0	0	24		TCGA-E2-A14X	0	0	11
TCGA-A5-A0GP	0	0	828		TCGA-AA-3971	0	0	54		TCGA-AN-A04D	0	0	24		TCGA-E2-A1B5	0	0	11
TCGA-AD-6889	1	1	815		TCGA-D5-6932	0	0	54		TCGA-AN-A0AL	0	0	24		TCGA-E9-A1N8	0	0	11
TCGA-A6-5665	1	1	811		TCGA-RQ-A6JB	1	1	54		TCGA-B6-A1KF	0	0	24		TCGA-E9-A1NH	0	0	11
TCGA-AX-A2HA	0	0	809		TCGA-LN-A4A6	0	0	54		TCGA-B6-A40B	0	0	24		TCGA-E9-A1QZ	0	0	11
TCGA-AA-A01R	0	0	804		TCGA-CN-6024	0	0	54		TCGA-BH-A0AY	0	0	24		TCGA-E9-A5FK	0	0	11
TCGA-AD-6895	0	0	795		TCGA-CV-7424	0	0	54		TCGA-BH-A0BL	0	0	24		TCGA-EW-A1P8	0	0	11
TCGA-AA-3663	0	0	788		TCGA-D6-A6EP	0	0	54		TCGA-C8-A12O	0	0	24		TCGA-LD-A9QF	0	0	11
TCGA-AZ-6598	1	1	763		TCGA-F7-8298	0	0	54		TCGA-C8-A26W	0	0	24		TCGA-OL-A66O	0	0	11
TCGA-MV-A51V	0	0	752		TCGA-F7-8489	0	0	54		TCGA-D8-A1Y0	0	0	24		TCGA-S3-AA14	0	0	11
TCGA-EB-A41A	0	0	742		TCGA-H7-7774	1	1	54		TCGA-E2-A150	0	0	24		TCGA-C5-A1MQ	0	0	11
TCGA-SJ-A6ZI	0	0	741		TCGA-KU-A6H7	0	0	54		TCGA-E9-A22B	0	0	24		TCGA-C5-A7CM	0	0	11
TCGA-F4-6570	0	0	727		TCGA-QK-A8Z9	0	0	54		TCGA-E9-A247	0	0	24		TCGA-EK-A2PK	0	0	11
TCGA-5M-AAT6	0	0	725		TCGA-B0-5701	0	0	54		TCGA-E9-A2JS	0	0	24		TCGA-IR-A3L7	0	0	11
TCGA-AA-A022	0	0	719		TCGA-5C-A9VH	0	0	54		TCGA-EW-A1PD	0	0	24		TCGA-W5-AA34	0	0	11
TCGA-86-8073	0	0	718		TCGA-DD-A11D	0	0	54		TCGA-GM-A2DD	0	0	24		TCGA-AA-3522	0	0	11
TCGA-95-7039	0	0	713		TCGA-39-5039	0	0	54		TCGA-LL-A73Z	0	0	24		TCGA-KH-A6WC	0	0	11
TCGA-L9-A7SV	0	0	713		TCGA-77-8150	0	0	54		TCGA-S3-AA11	1	1	24		TCGA-06-A5U0	0	0	11
TCGA-AA-3947	0	0	710		TCGA-HU-A4GD	0	0	54		TCGA-C5-A1BN	1	1	24		TCGA-19-A60I	0	0	11
TCGA-D1-A15X	1	1	708		TCGA-DF-A2KS	0	0	54		TCGA-DS-A0VL	0	0	24		TCGA-32-2634	0	0	11
TCGA-MN-A4N4	0	0	707		TCGA-DK-A1AG	0	0	53		TCGA-JX-A5QV	0	0	24		TCGA-CR-7392	0	0	11
TCGA-95-7043	0	0	697		TCGA-FD-A6TF	0	0	53		TCGA-Q1-A5R3	0	0	24		TCGA-CV-5979	0	0	11
TCGA-D5-6928	0	0	696		TCGA-GU-A42R	0	0	53		TCGA-VS-A94Y	1	1	24		TCGA-HD-7831	0	0	11
TCGA-G4-6628	0	0	693		TCGA-HQ-A2OF	0	0	53		TCGA-VS-A952	0	0	24		TCGA-IQ-7631	0	0	11
TCGA-UB-A7MB	0	0	683		TCGA-XF-A9SL	0	0	53		TCGA-W5-AA30	0	0	24		TCGA-KL-8327	0	0	11
TCGA-DF-A2KV	1	1	683		TCGA-A7-A0CE	0	0	53		TCGA-DC-6155	0	0	24		TCGA-KL-8332	0	0	11
TCGA-D6-6516	0	0	678		TCGA-A8-A07C	0	0	53		TCGA-AA-A02F	0	0	24		TCGA-KL-8342	0	0	11
TCGA-AD-A5EJ	0	0	663		TCGA-AN-A0AM	0	0	53		TCGA-CK-6748	0	0	24		TCGA-KL-8344	0	0	11
TCGA-L5-A8NM	0	0	651		TCGA-D8-A142	0	0	53		TCGA-F4-6808	0	0	24		TCGA-KM-8438	1	1	11
TCGA-33-4566	0	0	643		TCGA-C5-A1BK	0	0	53		TCGA-GR-A4D4	0	0	24		TCGA-KN-8424	0	0	11
TCGA-BS-A0TC	0	0	642		TCGA-C5-A7CO	1	1	53		TCGA-GR-A4D5	0	0	24		TCGA-KO-8403	0	0	11
TCGA-55-7994	0	0	637		TCGA-EA-A3QD	0	0	53		TCGA-L5-A4OQ	0	0	24		TCGA-KO-8410	0	0	11
TCGA-EY-A1GU	1	1	636		TCGA-AG-3896	0	0	53		TCGA-06-5412	0	0	24		TCGA-AK-3426	0	0	11
TCGA-IR-A3LK	0	0	632		TCGA-AG-3902	0	0	53		TCGA-14-2554	0	0	24		TCGA-B8-4619	0	0	11
TCGA-Q1-A73O	0	0	623		TCGA-AG-4015	0	0	53		TCGA-26-1442	0	0	24		TCGA-B8-A54F	0	0	11
TCGA-AX-A3FT	0	0	618		TCGA-EI-6510	1	1	53		TCGA-26-5135	0	0	24		TCGA-BP-4972	0	0	11
TCGA-AD-6964	0	0	615		TCGA-EI-6885	0	0	53		TCGA-CN-4725	0	0	24		TCGA-BP-5184	0	0	11
TCGA-60-2698	0	0	608		TCGA-A6-A56B	0	0	53		TCGA-CV-7090	0	0	24		TCGA-CJ-5680	0	0	11
TCGA-AA-3715	0	0	600		TCGA-AA-3489	0	0	53		TCGA-MT-A7BN	0	0	24		TCGA-CJ-5681	1	1	11
TCGA-EY-A1GD	0	0	600		TCGA-AA-3712	0	0	53		TCGA-QK-A6IH	0	0	24		TCGA-CW-5583	0	0	11
TCGA-AA-3877	0	0	599		TCGA-AA-3812	0	0	53		TCGA-AK-3458	0	0	24		TCGA-CZ-5454	0	0	11
TCGA-49-AARE	1	1	599		TCGA-AA-A01V	0	0	53		TCGA-B0-5102	0	0	24		TCGA-A4-A5DU	0	0	11
TCGA-98-8021	0	0	597		TCGA-CM-6165	0	0	53		TCGA-B0-5693	0	0	24		TCGA-BQ-5883	0	0	11
TCGA-A6-5661	1	1	595		TCGA-DM-A1D9	0	0	53		TCGA-B0-5706	0	0	24		TCGA-UN-AAZ9	0	0	11
TCGA-G4-6320	0	0	590		TCGA-DM-A28A	0	0	53		TCGA-B2-5633	0	0	24		TCGA-FV-A3I1	1	1	11
TCGA-44-3918	0	0	572		TCGA-G4-6311	0	0	53		TCGA-B8-5158	0	0	24		TCGA-44-5645	0	0	11
TCGA-ER-A194	0	0	569		TCGA-IG-A8O2	0	0	53		TCGA-CJ-4636	0	0	24		TCGA-55-8087	0	0	11
TCGA-DK-A3WW	0	0	564		TCGA-LN-A5U6	0	0	53		TCGA-CJ-5671	1	1	24		TCGA-91-A4BD	0	0	11
TCGA-69-7979	0	0	564		TCGA-VR-A8EY	0	0	53		TCGA-CZ-4864	0	0	24		TCGA-85-A513	0	0	11
TCGA-EA-A410	1	1	562		TCGA-VR-A8EZ	0	0	53		TCGA-CZ-5460	1	1	24		TCGA-3H-AB3U	1	1	11
TCGA-AP-A054	0	0	560		TCGA-BA-A4IF	0	0	53		TCGA-MM-A563	0	0	24		TCGA-LK-A4NZ	0	0	11
TCGA-EI-6882	0	0	555		TCGA-CQ-5331	0	0	53		TCGA-2Z-A9JQ	0	0	24		TCGA-MQ-A4LM	0	0	11
TCGA-NJ-A4YQ	0	0	552		TCGA-CQ-A4C6	0	0	53		TCGA-5P-A9K6	0	0	24		TCGA-SC-A6LN	0	0	11
TCGA-DK-A1AC	0	0	547		TCGA-CR-6474	0	0	53		TCGA-A4-A4ZT	0	0	24		TCGA-TS-A7P6	0	0	11
TCGA-37-4130	0	0	547		TCGA-CV-7425	0	0	53		TCGA-AT-A5NU	0	0	24		TCGA-UD-AAC5	0	0	11
TCGA-BH-A18G	0	0	544		TCGA-MT-A67D	0	0	53		TCGA-B9-4113	0	0	24		TCGA-YS-A95C	0	0	11
TCGA-HF-A5NB	0	0	543		TCGA-P3-A5Q6	0	0	53		TCGA-EV-5902	0	0	24		TCGA-YS-AA4M	0	0	11
TCGA-YC-A89H	1	1	538		TCGA-B0-4712	1	1	53		TCGA-UZ-A9PO	0	0	24		TCGA-13-1511	0	0	11
TCGA-86-8358	0	0	537		TCGA-DD-A73G	0	0	53		TCGA-CC-A5UC	0	0	24		TCGA-25-1316	0	0	11
TCGA-GN-A26C	1	1	537		TCGA-DD-AAD6	0	0	53		TCGA-DD-A4NE	0	0	24		TCGA-13-0913	0	0	11
TCGA-EY-A549	0	0	535		TCGA-75-6206	0	0	53		TCGA-DD-AAVU	0	0	24		TCGA-HV-A5A6	0	0	11
TCGA-A6-2686	0	0	534		TCGA-78-8655	0	0	53		TCGA-ED-A97K	0	0	24		TCGA-P8-A6RX	0	0	11
TCGA-AA-A02R	0	0	532		TCGA-56-8503	0	0	53		TCGA-05-4426	0	0	24		TCGA-RW-A8AZ	0	0	11
TCGA-CK-5916	0	0	528		TCGA-63-A5MJ	0	0	53		TCGA-44-3919	0	0	24		TCGA-SR-A6MX	1	1	11
TCGA-55-A490	0	0	528		TCGA-77-8145	0	0	53		TCGA-67-3772	0	0	24		TCGA-W2-A7HA	0	0	11
TCGA-A5-A2K3	0	0	528		TCGA-77-A5GB	0	0	53		TCGA-73-4675	0	0	24		TCGA-CH-5765	0	0	11
TCGA-63-A5MM	0	0	524		TCGA-BG-A0MK	0	0	53		TCGA-75-6205	0	0	24		TCGA-CH-5790	0	0	11
TCGA-DR-A0ZM	0	0	523		TCGA-FD-A3SP	0	0	52		TCGA-93-A4JO	0	0	24		TCGA-EJ-5508	1	1	11
TCGA-67-3771	0	0	521		TCGA-FD-A6TH	0	0	52		TCGA-96-A4JL	0	0	24		TCGA-EJ-5517	0	0	11
TCGA-A5-A0VP	1	1	520		TCGA-GC-A3WC	0	0	52		TCGA-SH-A7BH	0	0	24		TCGA-EJ-5526	0	0	11
TCGA-AA-3949	0	0	517		TCGA-ZF-A9R5	0	0	52		TCGA-04-1651	0	0	24		TCGA-EJ-5542	0	0	11
TCGA-CM-5861	1	1	517		TCGA-BH-A18U	0	0	52		TCGA-13-1510	0	0	24		TCGA-EJ-7115	0	0	11
TCGA-CR-7402	0	0	515		TCGA-E2-A14R	0	0	52		TCGA-24-1423	0	0	24		TCGA-EJ-7218	0	0	11
TCGA-86-A4JF	0	0	514		TCGA-C5-A1BM	0	0	52		TCGA-24-2019	0	0	24		TCGA-FC-7708	0	0	11
TCGA-55-8089	0	0	507		TCGA-EA-A3HT	0	0	52		TCGA-31-1950	0	0	24		TCGA-G9-6332	0	0	11
TCGA-AY-6197	0	0	506		TCGA-MY-A913	0	0	52		TCGA-HZ-8001	0	0	24		TCGA-G9-6343	0	0	11
TCGA-05-4427	1	1	504		TCGA-AF-3911	0	0	52		TCGA-IB-AAUQ	0	0	24		TCGA-G9-6373	0	0	11
TCGA-78-8662	0	0	502		TCGA-AG-4001	0	0	52		TCGA-EJ-8472	0	0	24		TCGA-G9-A9S7	0	0	11
TCGA-D5-6540	1	1	501		TCGA-DY-A1DD	0	0	52		TCGA-HC-A9TH	0	0	24		TCGA-HC-7820	0	0	11
TCGA-44-5644	0	0	495		TCGA-AA-3684	0	0	52		TCGA-KK-A8ID	0	0	24		TCGA-HC-7821	0	0	11
TCGA-50-6590	0	0	495		TCGA-AA-3989	0	0	52		TCGA-DX-A48R	0	0	24		TCGA-HC-8258	0	0	11
TCGA-BH-A0HF	0	0	494		TCGA-AD-6888	0	0	52		TCGA-DX-A6BA	0	0	24		TCGA-HC-A631	0	0	11
TCGA-B5-A5OC	0	0	491		TCGA-AZ-6605	0	0	52		TCGA-FX-A3TO	0	0	24		TCGA-HC-A632	0	0	11
TCGA-AX-A063	0	0	489		TCGA-DM-A28H	0	0	52		TCGA-QC-A6FX	0	0	24		TCGA-HC-A6HY	0	0	11
TCGA-AG-A02N	0	0	488		TCGA-G4-6295	0	0	52		TCGA-QQ-A5VA	0	0	24		TCGA-HC-A8CY	0	0	11
TCGA-AX-A1C9	0	0	486		TCGA-L5-A8NK	0	0	52		TCGA-UE-A6QU	0	0	24		TCGA-HI-7169	0	0	11
TCGA-A6-3809	0	0	482		TCGA-S8-A6BW	0	0	52		TCGA-2G-AALR	0	0	24		TCGA-J4-A67L	0	0	11
TCGA-62-A46O	0	0	480		TCGA-V5-AASV	1	1	52		TCGA-N8-A4PM	0	0	24		TCGA-J9-A8CN	0	0	11
TCGA-73-A9RS	0	0	480		TCGA-VR-AA7I	0	0	52		TCGA-A5-A0GV	0	0	24		TCGA-KC-A7FA	0	0	11
TCGA-AD-5900	1	1	478		TCGA-CN-6023	0	0	52		TCGA-AX-A06J	0	0	24		TCGA-KK-A6E1	0	0	11
TCGA-O2-A52Q	0	0	476		TCGA-CV-5434	0	0	52		TCGA-B5-A0K7	0	0	24		TCGA-KK-A8II	0	0	11
TCGA-D5-6930	0	0	474		TCGA-P3-A6T7	0	0	52		TCGA-B5-A3S1	0	0	24		TCGA-KK-A8IK	0	0	11
TCGA-EK-A3GK	1	1	472		TCGA-BC-A10U	0	0	52		TCGA-BS-A0WQ	0	0	24		TCGA-KK-A8IM	0	0	11
TCGA-QG-A5Z2	1	1	472		TCGA-BW-A5NO	0	0	52		TCGA-D1-A165	0	0	24		TCGA-V1-A9OX	0	0	11
TCGA-G2-A2EO	0	0	470		TCGA-CC-A1HT	0	0	52		TCGA-EO-A22Y	0	0	24		TCGA-V1-A9ZI	0	0	11
TCGA-DK-A2I4	0	0	469		TCGA-CC-A7II	0	0	52		TCGA-QS-A8F1	0	0	24		TCGA-VN-A88K	0	0	11
TCGA-G4-6302	0	0	469		TCGA-DD-A114	0	0	52		TCGA-OR-A5J8	0	0	23		TCGA-VN-A943	0	0	11
TCGA-50-5049	0	0	465		TCGA-DD-A118	0	0	52		TCGA-4Z-AA7S	0	0	23		TCGA-VP-AA1N	0	0	11
TCGA-AJ-A3BG	0	0	462		TCGA-49-6745	0	0	52		TCGA-BT-A0S7	0	0	23		TCGA-YL-A8SI	0	0	11
TCGA-4R-AA8I	0	0	460		TCGA-62-8398	0	0	52		TCGA-CF-A9FH	0	0	23		TCGA-YL-A8SJ	0	0	11
TCGA-AA-3713	0	0	457		TCGA-67-6215	0	0	52		TCGA-E7-A678	0	0	23		TCGA-YL-A8SK	0	0	11
TCGA-XF-AAMG	0	0	455		TCGA-34-2596	0	0	52		TCGA-XF-AAN4	0	0	23		TCGA-ZG-A8QX	0	0	11
TCGA-A6-6653	1	1	453		TCGA-46-3767	0	0	52		TCGA-CS-4941	0	0	23		TCGA-3B-A9HO	0	0	11
TCGA-EA-A3HU	0	0	451		TCGA-63-A5MG	0	0	52		TCGA-CS-5390	0	0	23		TCGA-DX-A1KW	0	0	11
TCGA-EI-6507	0	0	451		TCGA-77-8007	0	0	52		TCGA-DU-A5TT	0	0	23		TCGA-DX-A2J1	0	0	11
TCGA-VQ-A8PP	0	0	450		TCGA-29-1763	0	0	52		TCGA-FG-5962	0	0	23		TCGA-DX-A6B7	0	0	11
TCGA-VQ-A91K	0	0	444		TCGA-29-1769	0	0	52		TCGA-P5-A780	0	0	23		TCGA-DX-A6YT	0	0	11
TCGA-PK-A5HB	0	0	442		TCGA-EB-A1NK	0	0	52		TCGA-S9-A6TX	0	0	23		TCGA-IW-A3M4	0	0	11
TCGA-DX-AB2E	0	0	442		TCGA-BR-7959	0	0	52		TCGA-S9-A6U0	0	0	23		TCGA-IW-A3M5	0	0	11
TCGA-DK-A3X1	0	0	439		TCGA-VQ-A8E2	0	0	52		TCGA-S9-A89V	0	0	23		TCGA-MB-A8JK	0	0	11
TCGA-D8-A1JA	1	1	438		TCGA-VQ-A8PD	1	1	52		TCGA-A2-A0EV	0	0	23		TCGA-X9-A971	0	0	11
TCGA-A6-6781	0	0	437		TCGA-VQ-A8PJ	0	0	52		TCGA-A7-A13F	0	0	23		TCGA-Z4-A9VC	0	0	11
TCGA-BS-A0UJ	0	0	433		TCGA-VQ-AA6G	0	0	52		TCGA-A8-A07O	0	0	23		TCGA-X3-A8G4	0	0	11
TCGA-66-2785	0	0	430		TCGA-GU-A764	0	0	51		TCGA-A8-A085	0	0	23		TCGA-XE-AAOC	0	0	11
TCGA-E7-A7XN	1	1	428		TCGA-XF-AAN1	0	0	51		TCGA-A8-A08G	0	0	23		TCGA-XE-AAOF	0	0	11
TCGA-DM-A1HB	0	0	424		TCGA-P5-A5EV	0	0	51		TCGA-AN-A04A	0	0	23		TCGA-XY-A89B	0	0	11
TCGA-21-1080	1	1	424		TCGA-D8-A27H	0	0	51		TCGA-AN-A0FY	0	0	23		TCGA-ZM-AA05	0	0	11
TCGA-E6-A2P9	0	0	423		TCGA-EK-A2H0	0	0	51		TCGA-AO-A12D	0	0	23		TCGA-XM-A8RF	1	1	11
TCGA-G4-6586	0	0	422		TCGA-FU-A23K	0	0	51		TCGA-B6-A0I9	0	0	23		TCGA-XM-A8RG	0	0	11
TCGA-A6-6780	0	0	421		TCGA-VS-A9V4	0	0	51		TCGA-B6-A0RU	0	0	23		TCGA-ZB-A969	0	0	11
TCGA-QQ-A8VF	1	1	421		TCGA-ZJ-A8QR	0	0	51		TCGA-B6-A409	0	0	23		TCGA-ZL-A9V6	0	0	11
TCGA-AX-A1C5	0	0	421		TCGA-ZJ-AB0H	1	1	51		TCGA-B6-A40C	0	0	23		TCGA-BJ-A3PT	0	0	11
TCGA-AU-6004	0	0	418		TCGA-AF-A56N	0	0	51		TCGA-BH-A0DG	0	0	23		TCGA-DJ-A2Q0	0	0	11
TCGA-CM-6162	0	0	418		TCGA-AG-A01N	0	0	51		TCGA-BH-A18F	0	0	23		TCGA-DJ-A3UN	0	0	11
TCGA-D8-A27G	1	1	417		TCGA-DT-5265	0	0	51		TCGA-BH-A18H	0	0	23		TCGA-DJ-A4UQ	0	0	11
TCGA-EO-A22T	0	0	413		TCGA-EI-6508	0	0	51		TCGA-BH-A1FM	0	0	23		TCGA-E8-A242	0	0	11
TCGA-FD-A6TC	0	0	410		TCGA-F5-6465	0	0	51		TCGA-C8-A12Z	0	0	23		TCGA-EL-A3CN	0	0	11
TCGA-CK-5913	1	1	410		TCGA-A6-5657	0	0	51		TCGA-C8-A1HE	0	0	23		TCGA-EL-A4KG	0	0	11
TCGA-AO-A03M	0	0	408		TCGA-CM-4751	0	0	51		TCGA-E9-A1N9	0	0	23		TCGA-EM-A2OY	0	0	11
TCGA-G4-6304	0	0	408		TCGA-CM-5860	0	0	51		TCGA-EW-A1OZ	0	0	23		TCGA-EM-A4FM	0	0	11
TCGA-B5-A11Y	0	0	408		TCGA-DM-A1D0	0	0	51		TCGA-HN-A2NL	0	0	23		TCGA-EM-A4FV	0	0	11
TCGA-55-7907	0	0	407		TCGA-LN-A49R	0	0	51		TCGA-LL-A9Q3	0	0	23		TCGA-FK-A3SD	0	0	11
TCGA-49-AARN	1	1	403		TCGA-06-0649	0	0	51		TCGA-Q1-A73Q	0	0	23		TCGA-J8-A42S	0	0	11
TCGA-94-8490	0	0	402		TCGA-CN-5374	0	0	51		TCGA-UC-A7PI	0	0	23		TCGA-J8-A4HY	0	0	11
TCGA-SY-A9G5	1	1	401		TCGA-CX-A4AQ	0	0	51		TCGA-W5-AA36	0	0	23		TCGA-N6-A4VG	0	0	11
TCGA-IR-A3LA	0	0	401		TCGA-F7-A50G	0	0	51		TCGA-ZH-A8Y6	0	0	23		TCGA-NF-A4WU	0	0	11
TCGA-05-4397	0	0	400		TCGA-HD-A633	0	0	51		TCGA-CL-5917	0	0	23		TCGA-AJ-A3NF	0	0	11
TCGA-05-4424	0	0	395		TCGA-MZ-A7D7	0	0	51		TCGA-AA-A01S	0	0	23		TCGA-B5-A121	0	0	11
TCGA-ZF-A9RC	1	1	392		TCGA-RS-A6TP	0	0	51		TCGA-CA-6715	0	0	23		TCGA-BG-A0M2	0	0	11
TCGA-69-7980	0	0	388		TCGA-B1-A656	1	1	51		TCGA-CK-4948	0	0	23		TCGA-BG-A0VV	0	0	11
TCGA-D5-6530	0	0	386		TCGA-DD-AACT	0	0	51		TCGA-IG-A3YC	0	0	23		TCGA-BG-A0W2	0	0	11
TCGA-BF-A1Q0	0	0	386		TCGA-EP-A26S	0	0	51		TCGA-JY-A6FE	0	0	23		TCGA-D1-A16G	0	0	11
TCGA-64-5781	0	0	385		TCGA-05-4384	0	0	51		TCGA-L5-A43M	0	0	23		TCGA-EY-A1GV	0	0	11
TCGA-AA-3821	0	0	381		TCGA-55-7726	0	0	51		TCGA-R6-A8W5	0	0	23		TCGA-V4-A9EJ	0	0	11
TCGA-VQ-A8PB	0	0	380		TCGA-93-7348	0	0	51		TCGA-06-2557	0	0	23		TCGA-VD-A8KL	0	0	11
TCGA-L9-A8F4	0	0	379		TCGA-63-A5MP	0	0	51		TCGA-06-2565	0	0	23		TCGA-YZ-A982	0	0	11
TCGA-QS-A5YQ	0	0	378		TCGA-90-7766	0	0	51		TCGA-27-2526	0	0	23		TCGA-V4-A9EZ	0	0	11
TCGA-55-8507	0	0	375		TCGA-23-1110	0	0	51		TCGA-28-1747	0	0	23		TCGA-V4-A9ES	0	0	11
TCGA-55-A4DG	0	0	375		TCGA-23-1118	0	0	51		TCGA-4W-AA9T	0	0	23		TCGA-WC-AA9E	0	0	11
TCGA-EY-A1GK	1	1	373		TCGA-25-1323	0	0	51		TCGA-76-4926	0	0	23		TCGA-VD-A8KB	0	0	11
TCGA-CM-6171	0	0	370		TCGA-29-1698	0	0	51		TCGA-OX-A56R	0	0	23		TCGA-OR-A5JK	0	0	10
TCGA-AX-A060	0	0	370		TCGA-HZ-7918	0	0	51		TCGA-06-0158	0	0	23		TCGA-OR-A5K0	0	0	10
TCGA-21-1079	0	0	369		TCGA-IN-A6RS	0	0	51		TCGA-06-0745	0	0	23		TCGA-OR-A5KT	0	0	10
TCGA-78-7220	0	0	367		TCGA-ZQ-A9CR	0	0	51		TCGA-06-0747	0	0	23		TCGA-DK-A6B0	0	0	10
TCGA-D8-A1J8	0	0	366		TCGA-NF-A4X2	0	0	51		TCGA-BA-5151	0	0	23		TCGA-E7-A8O7	0	0	10
TCGA-DD-A1EE	0	0	366		TCGA-PG-A915	0	0	51		TCGA-CN-A49C	0	0	23		TCGA-DB-5280	0	0	10
TCGA-EC-A24G	0	0	365		TCGA-FD-A3SR	0	0	50		TCGA-CR-6492	0	0	23		TCGA-DB-A75O	0	0	10
TCGA-44-8117	0	0	363		TCGA-G2-A2EC	0	0	50		TCGA-CR-7376	0	0	23		TCGA-DU-5853	0	0	10
TCGA-AA-3966	1	1	356		TCGA-HT-7688	0	0	50		TCGA-CV-A6JT	0	0	23		TCGA-DU-7292	0	0	10
TCGA-CM-4743	0	0	355		TCGA-A8-A081	0	0	50		TCGA-A3-3363	0	0	23		TCGA-DU-8162	0	0	10
TCGA-49-AAR4	0	0	355		TCGA-AO-A0JD	0	0	50		TCGA-A3-A6NN	0	0	23		TCGA-E1-A7YU	1	1	10
TCGA-98-A538	0	0	355		TCGA-C5-A1MN	0	0	50		TCGA-B0-4818	0	0	23		TCGA-E1-A7Z6	0	0	10
TCGA-VS-A94Z	0	0	354		TCGA-VS-A8QA	0	0	50		TCGA-B0-5402	1	1	23		TCGA-F6-A8O4	0	0	10
TCGA-37-5819	0	0	354		TCGA-AG-3878	0	0	50		TCGA-B0-5691	0	0	23		TCGA-FG-6690	0	0	10
TCGA-AJ-A23O	1	1	354		TCGA-DY-A1DC	0	0	50		TCGA-B4-5836	0	0	23		TCGA-FG-6691	0	0	10
TCGA-KK-A59V	0	0	353		TCGA-F5-6813	0	0	50		TCGA-BP-4161	1	1	23		TCGA-FG-8191	0	0	10
TCGA-AX-A2HG	0	0	352		TCGA-G5-6641	0	0	50		TCGA-BP-4982	0	0	23		TCGA-FG-A87N	0	0	10
TCGA-CV-A6K2	0	0	351		TCGA-A6-6138	0	0	50		TCGA-CJ-5676	1	1	23		TCGA-HT-7472	0	0	10
TCGA-B5-A11H	0	0	351		TCGA-A6-6648	0	0	50		TCGA-CJ-5689	0	0	23		TCGA-HT-7611	0	0	10
TCGA-D1-A1NZ	0	0	350		TCGA-AU-3779	0	0	50		TCGA-CZ-5461	1	1	23		TCGA-HT-8109	0	0	10
TCGA-34-5231	0	0	349		TCGA-CM-6680	0	0	50		TCGA-T7-A92I	0	0	23		TCGA-HT-A4DS	0	0	10
TCGA-ZF-AA51	0	0	348		TCGA-D5-5537	0	0	50		TCGA-2K-A9WE	0	0	23		TCGA-HT-A74O	0	0	10
TCGA-AO-A128	0	0	345		TCGA-DM-A28C	0	0	50		TCGA-2Z-A9JM	0	0	23		TCGA-P5-A5F2	0	0	10
TCGA-D9-A4Z3	1	1	345		TCGA-LN-A5U7	0	0	50		TCGA-A4-7288	0	0	23		TCGA-P5-A737	0	0	10
TCGA-UY-A78K	0	0	343		TCGA-32-1970	0	0	50		TCGA-A4-8517	0	0	23		TCGA-QH-A6X3	0	0	10
TCGA-KN-8428	0	0	343		TCGA-41-5651	0	0	50		TCGA-A4-A772	0	0	23		TCGA-RY-A83Y	0	0	10
TCGA-VQ-AA6D	0	0	343		TCGA-CV-5436	0	0	50		TCGA-A4-A7UZ	0	0	23		TCGA-RY-A845	0	0	10
TCGA-EA-A3HS	0	0	339		TCGA-CV-7091	1	1	50		TCGA-B1-7332	0	0	23		TCGA-S9-A6UB	0	0	10
TCGA-39-5031	0	0	339		TCGA-CV-7407	0	0	50		TCGA-B9-4117	0	0	23		TCGA-S9-A7R7	0	0	10
TCGA-CK-6746	0	0	338		TCGA-CZ-5465	0	0	50		TCGA-BQ-5892	0	0	23		TCGA-TM-A84G	0	0	10
TCGA-75-5126	1	1	338		TCGA-2Z-A9JD	0	0	50		TCGA-DW-7841	0	0	23		TCGA-TQ-A7RK	0	0	10
TCGA-AX-A3G8	0	0	338		TCGA-SX-A71S	0	0	50		TCGA-IA-A83W	0	0	23		TCGA-W9-A837	0	0	10
TCGA-37-3792	0	0	337		TCGA-CC-A7IF	0	0	50		TCGA-UZ-A9PJ	0	0	23		TCGA-WY-A858	0	0	10
TCGA-S5-A6DX	0	0	336		TCGA-DD-AACG	1	1	50		TCGA-2Y-A9GX	0	0	23		TCGA-4H-AAAK	0	0	10
TCGA-XF-A9T8	1	1	331		TCGA-05-5715	0	0	50		TCGA-2Y-A9GY	0	0	23		TCGA-A1-A0SB	0	0	10
TCGA-ZF-A9R7	1	1	330		TCGA-62-A471	0	0	50		TCGA-CC-A3MA	0	0	23		TCGA-A2-A0CZ	0	0	10
TCGA-E5-A4U1	0	0	329		TCGA-86-8359	0	0	50		TCGA-DD-A3A5	0	0	23		TCGA-A2-A0D3	0	0	10
TCGA-78-7155	0	0	328		TCGA-56-5897	0	0	50		TCGA-DD-AACO	0	0	23		TCGA-A2-A0EM	0	0	10
TCGA-EB-A3Y7	0	0	328		TCGA-56-8083	0	0	50		TCGA-K7-A5RF	0	0	23		TCGA-A2-A0YC	0	0	10
TCGA-AP-A1DR	0	0	328		TCGA-24-1849	0	0	50		TCGA-50-6591	0	0	23		TCGA-A2-A1G0	0	0	10
TCGA-W5-AA39	0	0	327		TCGA-29-1701	0	0	50		TCGA-XT-AASU	0	0	23		TCGA-A2-A4S2	0	0	10
TCGA-44-7670	0	0	326		TCGA-CH-5769	0	0	50		TCGA-23-1113	0	0	23		TCGA-A7-A26E	0	0	10
TCGA-BF-A5EO	0	0	326		TCGA-KB-A93G	0	0	50		TCGA-24-1464	0	0	23		TCGA-A7-A26F	0	0	10
TCGA-G4-6309	0	0	325		TCGA-VQ-AA6A	0	0	50		TCGA-24-1603	0	0	23		TCGA-A7-A26J	0	0	10
TCGA-D8-A1XQ	0	0	324		TCGA-D1-A3DG	0	0	50		TCGA-29-1695	0	0	23		TCGA-A7-A3RF	0	0	10
TCGA-22-5473	0	0	323		TCGA-BT-A2LD	0	0	49		TCGA-61-1738	0	0	23		TCGA-A8-A086	0	0	10
TCGA-AJ-A3OK	1	1	323		TCGA-C4-A0F0	0	0	49		TCGA-61-2101	0	0	23		TCGA-A8-A08A	0	0	10
TCGA-44-8120	0	0	322		TCGA-FD-A3B3	0	0	49		TCGA-13-0905	0	0	23		TCGA-AC-A2QH	0	0	10
TCGA-EB-A6QY	0	0	322		TCGA-YC-A8S6	0	0	49		TCGA-3A-A9IH	0	0	23		TCGA-AC-A3YJ	0	0	10
TCGA-XF-A9T5	0	0	321		TCGA-ZF-A9RN	0	0	49		TCGA-3E-AAAZ	0	0	23		TCGA-AC-A8OR	0	0	10
TCGA-46-3769	0	0	321		TCGA-A2-A0CT	0	0	49		TCGA-HZ-7922	0	0	23		TCGA-AO-A0J7	0	0	10
TCGA-AJ-A3OJ	0	0	321		TCGA-A8-A09W	0	0	49		TCGA-HZ-8005	0	0	23		TCGA-AO-A0J8	0	0	10
TCGA-53-7624	1	1	320		TCGA-AQ-A04J	0	0	49		TCGA-IB-7889	0	0	23		TCGA-AO-A0JF	0	0	10
TCGA-05-4398	0	0	319		TCGA-BH-A0W7	1	1	49		TCGA-CH-5767	0	0	23		TCGA-AO-A12H	0	0	10
TCGA-BS-A0TJ	0	0	318		TCGA-D8-A1XL	0	0	49		TCGA-EJ-8474	0	0	23		TCGA-AO-A1KP	0	0	10
TCGA-CM-4746	0	0	317		TCGA-GI-A2C8	0	0	49		TCGA-J9-A8CL	0	0	23		TCGA-AO-A1KS	0	0	10
TCGA-PG-A917	1	1	316		TCGA-UU-A93S	0	0	49		TCGA-V1-A9ZR	0	0	23		TCGA-AR-A1AL	0	0	10
TCGA-UY-A9PB	0	0	315		TCGA-Q1-A6DW	0	0	49		TCGA-XK-AAIV	0	0	23		TCGA-AR-A1AN	0	0	10
TCGA-CC-A7IH	0	0	315		TCGA-AG-3882	0	0	49		TCGA-YL-A8SC	0	0	23		TCGA-AR-A1AP	0	0	10
TCGA-49-AARQ	0	0	315		TCGA-EI-6883	0	0	49		TCGA-3B-A9HX	0	0	23		TCGA-AR-A1AT	0	0	10
TCGA-IH-A3EA	0	0	315		TCGA-A6-2681	0	0	49		TCGA-DX-A1KU	0	0	23		TCGA-AR-A24T	0	0	10
TCGA-38-4631	1	1	314		TCGA-AA-3675	0	0	49		TCGA-DX-A7EL	0	0	23		TCGA-AR-A24X	0	0	10
TCGA-D1-A177	0	0	314		TCGA-AA-3986	0	0	49		TCGA-DX-A7ET	0	0	23		TCGA-BH-A0DO	0	0	10
TCGA-39-5011	0	0	313		TCGA-DM-A28M	0	0	49		TCGA-FX-A2QS	0	0	23		TCGA-BH-A0HQ	0	0	10
TCGA-22-4613	0	0	312		TCGA-G4-6627	0	0	49		TCGA-KD-A5QU	0	0	23		TCGA-BH-A0W3	0	0	10
TCGA-A5-A0GB	0	0	311		TCGA-JY-A6F8	0	0	49		TCGA-QQ-A5VC	0	0	23		TCGA-BH-A1FJ	0	0	10
TCGA-AA-A01P	0	0	310		TCGA-CR-7379	0	0	49		TCGA-WK-A8XS	0	0	23		TCGA-C8-A130	0	0	10
TCGA-86-6851	0	0	310		TCGA-CR-7383	0	0	49		TCGA-WK-A8XY	0	0	23		TCGA-D8-A1X7	0	0	10
TCGA-GC-A4ZW	0	0	309		TCGA-CR-7389	0	0	49		TCGA-WK-A8Y0	0	0	23		TCGA-D8-A1XF	0	0	10
TCGA-75-6214	1	1	309		TCGA-CV-7406	0	0	49		TCGA-F1-A72C	0	0	23		TCGA-E2-A15J	0	0	10
TCGA-B5-A0K9	0	0	309		TCGA-CV-A6JD	0	0	49		TCGA-RD-A7BS	0	0	23		TCGA-E2-A1LL	0	0	10
TCGA-CM-6674	0	0	305		TCGA-CV-A6JZ	0	0	49		TCGA-2G-AALP	0	0	23		TCGA-E9-A229	0	0	10
TCGA-AJ-A2QO	0	0	305		TCGA-UF-A7JJ	0	0	49		TCGA-N5-A4RF	0	0	23		TCGA-EW-A1J1	0	0	10
TCGA-KQ-A41R	0	0	304		TCGA-B8-5550	0	0	49		TCGA-N5-A59E	0	0	23		TCGA-EW-A6SD	0	0	10
TCGA-L5-A43J	0	0	304		TCGA-CC-5264	0	0	49		TCGA-NG-A4VW	0	0	23		TCGA-GM-A5PV	0	0	10
TCGA-44-2656	0	0	304		TCGA-DD-AACD	0	0	49		TCGA-ND-A4WF	0	0	23		TCGA-LL-A50Y	0	0	10
TCGA-66-2756	0	0	304		TCGA-DD-AAE9	0	0	49		TCGA-A5-AB3J	0	0	23		TCGA-OK-A5Q2	0	0	10
TCGA-AJ-A8CT	0	0	304		TCGA-62-8394	0	0	49		TCGA-AX-A3FZ	0	0	23		TCGA-OL-A5S0	0	0	10
TCGA-AJ-A8CW	0	0	304		TCGA-80-5607	1	1	49		TCGA-BG-A0MO	0	0	23		TCGA-DG-A2KH	0	0	10
TCGA-D1-A16Y	1	1	304		TCGA-70-6723	0	0	49		TCGA-BG-A3PP	0	0	23		TCGA-DS-A7WI	0	0	10
TCGA-F4-6856	0	0	303		TCGA-85-7698	0	0	49		TCGA-BS-A0U5	0	0	23		TCGA-HM-A3JK	0	0	10
TCGA-49-6743	0	0	302		TCGA-L3-A4E7	0	0	49		TCGA-BS-A0V6	0	0	23		TCGA-4G-AAZO	0	0	10
TCGA-49-AAR9	0	0	302		TCGA-24-1425	0	0	49		TCGA-D1-A2G7	0	0	23		TCGA-ZD-A8I3	0	0	10
TCGA-DD-AAC8	0	0	298		TCGA-24-1431	0	0	49		TCGA-H5-A2HR	0	0	23		TCGA-ZH-A8Y8	0	0	10
TCGA-55-A4DF	1	1	298		TCGA-57-1993	0	0	49		TCGA-JU-AAVI	0	0	23		TCGA-06-0141	0	0	10
TCGA-XF-A9T0	0	0	297		TCGA-13-0884	0	0	49		TCGA-KP-A3W3	0	0	23		TCGA-06-0132	0	0	10
TCGA-EO-A3AZ	0	0	297		TCGA-EB-A3XC	0	0	49		TCGA-OR-A5JX	0	0	22		TCGA-CN-4733	0	0	10
TCGA-CV-A45Z	0	0	296		TCGA-BG-A0M0	0	0	49		TCGA-BT-A20P	0	0	22		TCGA-CQ-A4CH	0	0	10
TCGA-BK-A13B	0	0	295		TCGA-BL-A13I	0	0	48		TCGA-CF-A3MH	0	0	22		TCGA-CR-5249	0	0	10
TCGA-C8-A26Y	0	0	294		TCGA-FD-A5C0	1	1	48		TCGA-CS-5395	0	0	22		TCGA-CV-5971	0	0	10
TCGA-D8-A1XK	1	1	294		TCGA-ZF-A9R1	0	0	48		TCGA-DU-8168	0	0	22		TCGA-CV-7423	0	0	10
TCGA-CV-A461	0	0	292		TCGA-A2-A0D2	0	0	48		TCGA-E1-A7YL	0	0	22		TCGA-CV-A6K0	0	0	10
TCGA-78-7536	0	0	292		TCGA-AN-A0FJ	0	0	48		TCGA-E1-A7YM	1	1	22		TCGA-IQ-A61J	0	0	10
TCGA-DK-A6B6	1	1	291		TCGA-AO-A0J9	0	0	48		TCGA-FG-A711	0	0	22		TCGA-KL-8323	0	0	10
TCGA-44-8119	0	0	291		TCGA-C8-A26V	0	0	48		TCGA-HW-A5KK	0	0	22		TCGA-KL-8326	0	0	10
TCGA-69-7978	0	0	288		TCGA-E9-A22E	0	0	48		TCGA-P5-A72U	0	0	22		TCGA-KL-8330	0	0	10
TCGA-AX-A1C4	0	0	288		TCGA-PE-A5DC	0	0	48		TCGA-S9-A7J0	0	0	22		TCGA-KM-8442	0	0	10
TCGA-AN-A0AK	0	0	287		TCGA-JW-AAVH	0	0	48		TCGA-S9-A7QZ	0	0	22		TCGA-KN-8422	0	0	10
TCGA-EC-A1QX	0	0	287		TCGA-AF-4110	0	0	48		TCGA-VW-A7QS	0	0	22		TCGA-KN-8423	0	0	10
TCGA-EY-A5W2	0	0	287		TCGA-AG-3885	0	0	48		TCGA-A2-A04N	0	0	22		TCGA-AK-3456	0	0	10
TCGA-56-A62T	0	0	286		TCGA-F5-6571	0	0	48		TCGA-A2-A0SW	0	0	22		TCGA-B0-5083	0	0	10
TCGA-DI-A0WH	0	0	286		TCGA-F5-6812	0	0	48		TCGA-A2-A0YG	0	0	22		TCGA-B0-5399	1	1	10
TCGA-D1-A17H	0	0	283		TCGA-AA-A03F	0	0	48		TCGA-A7-A13E	0	0	22		TCGA-B2-3923	0	0	10
TCGA-55-8511	0	0	281		TCGA-AD-6548	1	1	48		TCGA-A7-A4SE	0	0	22		TCGA-B8-5553	0	0	10
TCGA-DK-AA6S	0	0	280		TCGA-AD-A5EK	0	0	48		TCGA-A8-A09B	0	0	22		TCGA-CZ-5989	0	0	10
TCGA-AA-3845	0	0	280		TCGA-AZ-6603	0	0	48		TCGA-AO-A0J5	0	0	22		TCGA-AL-3467	0	0	10
TCGA-ZF-AA4V	0	0	279		TCGA-CK-4947	0	0	48		TCGA-AR-A1AR	0	0	22		TCGA-BQ-5888	0	0	10
TCGA-CN-A63U	0	0	279		TCGA-CM-4750	0	0	48		TCGA-BH-A0C7	0	0	22		TCGA-BQ-7050	0	0	10
TCGA-38-4632	0	0	279		TCGA-D5-6929	0	0	48		TCGA-BH-A0H7	0	0	22		TCGA-DW-5561	0	0	10
TCGA-64-1676	0	0	279		TCGA-G4-6298	0	0	48		TCGA-BH-A18J	0	0	22		TCGA-DZ-6131	0	0	10
TCGA-43-5668	0	0	279		TCGA-GS-A9TV	0	0	48		TCGA-C8-A138	0	0	22		TCGA-G7-6789	0	0	10
TCGA-AX-A3FS	0	0	278		TCGA-GS-A9U3	0	0	48		TCGA-D8-A1JB	0	0	22		TCGA-GL-7966	0	0	10
TCGA-73-4668	0	0	277		TCGA-L5-A8NG	0	0	48		TCGA-E2-A15A	0	0	22		TCGA-G3-A7M8	0	0	10
TCGA-77-A5G3	0	0	277		TCGA-BA-A4II	0	0	48		TCGA-E2-A15G	0	0	22		TCGA-55-8619	0	0	10
TCGA-3C-AALI	0	0	276		TCGA-CN-4738	0	0	48		TCGA-E2-A573	0	0	22		TCGA-75-7030	0	0	10
TCGA-CR-7370	0	0	276		TCGA-CN-A49B	0	0	48		TCGA-E9-A1NF	0	0	22		TCGA-97-8552	0	0	10
TCGA-05-4410	0	0	276		TCGA-CQ-6223	0	0	48		TCGA-E9-A1R6	0	0	22		TCGA-98-A53H	0	0	10
TCGA-05-4432	0	0	275		TCGA-CR-6478	0	0	48		TCGA-E9-A22G	0	0	22		TCGA-LK-A4O2	0	0	10
TCGA-CR-7388	0	0	274		TCGA-CV-7178	0	0	48		TCGA-EW-A1IW	0	0	22		TCGA-MQ-A4LC	0	0	10
TCGA-L9-A444	0	0	274		TCGA-CV-7235	0	0	48		TCGA-GM-A2DL	0	0	22		TCGA-SH-A7BC	0	0	10
TCGA-EB-A5UM	0	0	274		TCGA-CV-A6JU	0	0	48		TCGA-S3-AA0Z	0	0	22		TCGA-TS-A7OY	0	0	10
TCGA-4Z-AA7M	0	0	273		TCGA-KU-A66T	0	0	48		TCGA-C5-A1M5	0	0	22		TCGA-ZN-A9VP	0	0	10
TCGA-55-6968	0	0	273		TCGA-QK-A8ZB	0	0	48		TCGA-C5-A1MP	0	0	22		TCGA-04-1341	0	0	10
TCGA-19-1787	0	0	272		TCGA-B0-5712	0	0	48		TCGA-DG-A2KJ	0	0	22		TCGA-13-1495	0	0	10
TCGA-CQ-7071	0	0	272		TCGA-BP-4782	0	0	48		TCGA-VS-A8Q8	0	0	22		TCGA-13-0768	0	0	10
TCGA-R5-A7ZI	0	0	272		TCGA-IA-A83S	0	0	48		TCGA-W5-AA2Q	0	0	22		TCGA-2J-AABT	0	0	10
TCGA-AP-A1DH	1	1	272		TCGA-P4-A5E6	0	0	48		TCGA-ZH-A8Y1	0	0	22		TCGA-HV-A5A5	0	0	10
TCGA-K4-A54R	0	0	271		TCGA-Y8-A896	0	0	48		TCGA-ZH-A8Y4	1	1	22		TCGA-HZ-A8P0	0	0	10
TCGA-43-8118	0	0	270		TCGA-3K-AAZ8	0	0	48		TCGA-CM-4748	0	0	22		TCGA-US-A779	0	0	10
TCGA-EB-A3Y6	0	0	269		TCGA-DD-AACE	0	0	48		TCGA-CM-5344	0	0	22		TCGA-US-A77G	0	0	10
TCGA-DF-A2KZ	0	0	268		TCGA-G3-A7M6	0	0	48		TCGA-JY-A939	0	0	22		TCGA-QR-A70P	0	0	10
TCGA-D5-6927	0	0	267		TCGA-44-6779	0	0	48		TCGA-LN-A49O	0	0	22		TCGA-QR-A70U	0	0	10
TCGA-50-6594	0	0	266		TCGA-73-7499	0	0	48		TCGA-VR-AA4G	0	0	22		TCGA-QT-A5XJ	0	0	10
TCGA-34-8455	0	0	266		TCGA-66-2768	0	0	48		TCGA-06-5414	0	0	22		TCGA-QT-A5XP	0	0	10
TCGA-XF-A9ST	1	1	265		TCGA-09-1674	1	1	48		TCGA-19-2619	0	0	22		TCGA-SA-A6C2	0	0	10
TCGA-05-4390	0	0	265		TCGA-23-2078	0	0	48		TCGA-19-5960	0	0	22		TCGA-W2-A7HC	0	0	10
TCGA-AX-A2HJ	1	1	265		TCGA-61-1914	0	0	48		TCGA-26-5133	0	0	22		TCGA-WB-A80V	0	0	10
TCGA-49-AARO	0	0	264		TCGA-FB-AAPU	0	0	48		TCGA-27-2519	0	0	22		TCGA-4L-AA1F	0	0	10
TCGA-B7-A5TI	0	0	263		TCGA-LB-A7SX	0	0	48		TCGA-27-2524	0	0	22		TCGA-CH-5791	0	0	10
TCGA-NC-A5HG	0	0	262		TCGA-US-A776	0	0	48		TCGA-28-2509	0	0	22		TCGA-EJ-5507	0	0	10
TCGA-J9-A52C	0	0	262		TCGA-DX-A3M2	0	0	48		TCGA-28-2514	0	0	22		TCGA-EJ-7327	0	0	10
TCGA-VS-A958	1	1	260		TCGA-EB-A299	0	0	48		TCGA-06-0187	0	0	22		TCGA-EJ-7331	0	0	10
TCGA-AM-5821	1	1	260		TCGA-VQ-A91Z	0	0	48		TCGA-CQ-5330	0	0	22		TCGA-EJ-7792	0	0	10
TCGA-63-A5MW	0	0	260		TCGA-N8-A4PP	0	0	48		TCGA-CV-7238	0	0	22		TCGA-EJ-A6RC	0	0	10
TCGA-77-7141	1	1	260		TCGA-A5-A0G5	0	0	48		TCGA-A3-3349	0	0	22		TCGA-EJ-A8FO	0	0	10
TCGA-FI-A2D6	0	0	260		TCGA-AX-A1C8	0	0	48		TCGA-A3-3357	0	0	22		TCGA-G9-6342	0	0	10
TCGA-DK-AA71	0	0	259		TCGA-BG-A0MG	0	0	48		TCGA-A3-A6NI	0	0	22		TCGA-G9-6347	0	0	10
TCGA-50-5930	0	0	259		TCGA-CF-A5UA	0	0	47		TCGA-A3-A6NL	0	0	22		TCGA-G9-6364	0	0	10
TCGA-IR-A3LH	0	0	258		TCGA-CU-A3QU	0	0	47		TCGA-A3-A8OW	0	0	22		TCGA-G9-6384	0	0	10
TCGA-95-7567	0	0	257		TCGA-FT-A3EE	0	0	47		TCGA-B0-5088	0	0	22		TCGA-G9-7509	0	0	10
TCGA-OR-A5JA	1	1	256		TCGA-GV-A3QK	0	0	47		TCGA-B0-5702	1	1	22		TCGA-HC-7080	0	0	10
TCGA-BT-A3PJ	0	0	256		TCGA-DB-A64L	0	0	47		TCGA-BP-4993	0	0	22		TCGA-HC-7232	0	0	10
TCGA-D1-A0ZO	0	0	256		TCGA-A1-A0SH	0	0	47		TCGA-BP-4999	0	0	22		TCGA-HC-7747	0	0	10
TCGA-BT-A0YX	0	0	255		TCGA-AO-A03T	1	1	47		TCGA-CJ-4916	0	0	22		TCGA-HC-7750	0	0	10
TCGA-BA-5152	0	0	254		TCGA-D8-A1JC	0	0	47		TCGA-CW-5581	0	0	22		TCGA-HC-8261	0	0	10
TCGA-55-8302	0	0	253		TCGA-XX-A89A	0	0	47		TCGA-CW-5587	0	0	22		TCGA-HC-8266	0	0	10
TCGA-D1-A174	0	0	253		TCGA-C5-A1M7	1	1	47		TCGA-2Z-A9J7	0	0	22		TCGA-HC-A6HX	0	0	10
TCGA-GV-A3QI	0	0	252		TCGA-EK-A2RB	0	0	47		TCGA-DW-7836	0	0	22		TCGA-J4-A67O	0	0	10
TCGA-GV-A3JZ	0	0	250		TCGA-MA-AA3Y	0	0	47		TCGA-F9-A4JJ	0	0	22		TCGA-J4-A6G1	0	0	10
TCGA-XF-A8HE	0	0	250		TCGA-G4-6303	0	0	47		TCGA-G7-6790	0	0	22		TCGA-J4-A83I	0	0	10
TCGA-55-8205	0	0	250		TCGA-LN-A49P	0	0	47		TCGA-WN-AB4C	0	0	22		TCGA-KK-A59Y	0	0	10
TCGA-D1-A2G0	1	1	250		TCGA-V5-A7RC	0	0	47		TCGA-2Y-A9H2	0	0	22		TCGA-KK-A8I4	0	0	10
TCGA-UY-A9PF	1	1	249		TCGA-P3-A6SW	0	0	47		TCGA-BC-A8YO	0	0	22		TCGA-KK-A8IC	0	0	10
TCGA-TN-A7HL	0	0	249		TCGA-P3-A6T6	1	1	47		TCGA-DD-AACN	0	0	22		TCGA-V1-A8WW	0	0	10
TCGA-66-2773	0	0	249		TCGA-QK-A6IG	0	0	47		TCGA-DD-AAVX	0	0	22		TCGA-V1-A9OA	0	0	10
TCGA-BG-A2L7	0	0	249		TCGA-UF-A7JK	0	0	47		TCGA-67-6216	1	1	22		TCGA-V1-A9OL	0	0	10
TCGA-BS-A0TA	0	0	249		TCGA-GK-A6C7	0	0	47		TCGA-13-1404	1	1	22		TCGA-VP-A876	0	0	10
TCGA-44-7662	0	0	248		TCGA-5P-A9JY	0	0	47		TCGA-13-1482	0	0	22		TCGA-VP-A878	0	0	10
TCGA-DK-AA75	0	0	247		TCGA-B9-A8YI	0	0	47		TCGA-25-1329	0	0	22		TCGA-YL-A8SR	0	0	10
TCGA-38-4625	0	0	247		TCGA-UZ-A9PR	0	0	47		TCGA-29-1702	0	0	22		TCGA-ZG-A9L2	0	0	10
TCGA-90-7769	0	0	247		TCGA-BC-A69H	0	0	47		TCGA-31-1953	0	0	22		TCGA-3B-A9HJ	0	0	10
TCGA-H4-A2HQ	0	0	246		TCGA-DD-A11C	0	0	47		TCGA-59-2348	0	0	22		TCGA-3B-A9HU	0	0	10
TCGA-VQ-A8PX	0	0	246		TCGA-DD-A73A	0	0	47		TCGA-2L-AAQE	0	0	22		TCGA-DX-A7EO	0	0	10
TCGA-EO-A22S	0	0	245		TCGA-DD-AACB	0	0	47		TCGA-F2-6879	0	0	22		TCGA-DX-AB2X	0	0	10
TCGA-44-6778	0	0	244		TCGA-DD-AAE2	0	0	47		TCGA-HZ-A49I	0	0	22		TCGA-DX-AB36	0	0	10
TCGA-78-7539	0	0	244		TCGA-G3-AAV5	0	0	47		TCGA-RB-A7B8	1	1	22		TCGA-IE-A4EI	0	0	10
TCGA-NJ-A4YF	0	0	244		TCGA-91-6849	0	0	47		TCGA-EJ-7330	0	0	22		TCGA-K1-A6RU	0	0	10
TCGA-94-8491	0	0	244		TCGA-95-8494	0	0	47		TCGA-EJ-7781	0	0	22		TCGA-MB-A5Y8	0	0	10
TCGA-SL-A6JA	0	0	244		TCGA-68-7756	0	0	47		TCGA-EJ-A65E	0	0	22		TCGA-MJ-A850	0	0	10
TCGA-O2-A52N	0	0	243		TCGA-96-7545	0	0	47		TCGA-EJ-A7NN	0	0	22		TCGA-FR-A2OS	0	0	10
TCGA-CV-6961	0	0	242		TCGA-13-A5FT	0	0	47		TCGA-HC-8264	0	0	22		TCGA-2G-AAF6	0	0	10
TCGA-86-8585	0	0	242		TCGA-25-2042	0	0	47		TCGA-HC-A6AN	0	0	22		TCGA-2G-AAFH	0	0	10
TCGA-91-6836	1	1	242		TCGA-30-1857	0	0	47		TCGA-J4-AATZ	0	0	22		TCGA-2G-AAG5	0	0	10
TCGA-CN-5360	0	0	241		TCGA-2J-AABO	0	0	47		TCGA-M7-A722	0	0	22		TCGA-2G-AAGP	0	0	10
TCGA-B0-5098	1	1	239		TCGA-3A-A9I9	0	0	47		TCGA-V1-A8WV	0	0	22		TCGA-2G-AAH8	0	0	10
TCGA-78-8640	0	0	238		TCGA-IN-A7NU	0	0	47		TCGA-VN-A88Q	0	0	22		TCGA-YU-A90Y	0	0	10
TCGA-DX-A8BP	0	0	237		TCGA-EY-A2ON	0	0	47		TCGA-VP-A879	0	0	22		TCGA-2G-AAM4	0	0	10
TCGA-49-AAR2	0	0	236		TCGA-EY-A54A	0	0	47		TCGA-XK-AAJP	0	0	22		TCGA-2G-AAM3	0	0	10
TCGA-2F-A9KO	0	0	235		TCGA-GU-A762	0	0	46		TCGA-3B-A9HL	0	0	22		TCGA-XM-AAZ3	0	0	10
TCGA-CV-A45W	0	0	235		TCGA-H4-A2HO	0	0	46		TCGA-DX-A48O	0	0	22		TCGA-ZB-A96I	0	0	10
TCGA-44-A4SS	0	0	235		TCGA-K4-A5RI	0	0	46		TCGA-DX-AB3A	0	0	22		TCGA-ZB-A96K	0	0	10
TCGA-69-7974	0	0	235		TCGA-XF-AAN3	0	0	46		TCGA-KD-A5QS	0	0	22		TCGA-BJ-A0ZH	1	1	10
TCGA-EO-A3AU	0	0	235		TCGA-E2-A1LA	0	0	46		TCGA-QC-AA9N	0	0	22		TCGA-BJ-A3PU	0	0	10
TCGA-FJ-A3ZE	0	0	234		TCGA-EA-A97N	0	0	46		TCGA-QQ-A8VH	0	0	22		TCGA-DE-A0Y2	0	0	10
TCGA-ZF-AA4X	1	1	234		TCGA-EK-A2IP	0	0	46		TCGA-X6-A7WA	0	0	22		TCGA-DE-A4MD	0	0	10
TCGA-44-7667	0	0	234		TCGA-WL-A834	0	0	46		TCGA-EB-A3HV	0	0	22		TCGA-DJ-A13W	0	0	10
TCGA-86-8673	1	1	234		TCGA-ZJ-AAXT	0	0	46		TCGA-N6-A4VE	0	0	22		TCGA-DJ-A1QH	0	0	10
TCGA-EB-A24D	0	0	233		TCGA-AG-3726	0	0	46		TCGA-N8-A4PN	0	0	22		TCGA-DJ-A4UR	0	0	10
TCGA-53-A4EZ	0	0	232		TCGA-AG-3883	0	0	46		TCGA-N8-A4PQ	0	0	22		TCGA-DJ-A4V4	0	0	10
TCGA-FR-A3R1	0	0	232		TCGA-DC-6682	0	0	46		TCGA-2E-A9G8	0	0	22		TCGA-E8-A417	0	0	10
TCGA-56-8625	0	0	231		TCGA-AA-3655	0	0	46		TCGA-5B-A90C	0	0	22		TCGA-EL-A3MX	0	0	10
TCGA-GM-A2D9	0	0	230		TCGA-AA-A02Y	0	0	46		TCGA-A5-A0GM	0	0	22		TCGA-EM-A2OV	0	0	10
TCGA-35-5375	0	0	230		TCGA-AD-6965	0	0	46		TCGA-A5-A0GU	0	0	22		TCGA-EM-A3FN	0	0	10
TCGA-BF-A5ES	1	1	230		TCGA-DM-A1D7	0	0	46		TCGA-AP-A0LO	0	0	22		TCGA-EM-A3SY	0	0	10
TCGA-CR-6481	0	0	229		TCGA-FA-A7DS	0	0	46		TCGA-AX-A0IS	0	0	22		TCGA-EM-A3SZ	0	0	10
TCGA-QQ-A8VG	0	0	229		TCGA-2H-A9GQ	0	0	46		TCGA-AX-A3G1	0	0	22		TCGA-ET-A39P	0	0	10
TCGA-FD-A6TG	0	0	228		TCGA-L5-A8NF	0	0	46		TCGA-B5-A11P	0	0	22		TCGA-ET-A3BT	0	0	10
TCGA-21-5787	0	0	228		TCGA-28-5209	0	0	46		TCGA-D1-A0ZZ	0	0	22		TCGA-FE-A22Z	0	0	10
TCGA-CR-7364	0	0	226		TCGA-06-0744	0	0	46		TCGA-D1-A16E	0	0	22		TCGA-FY-A76V	0	0	10
TCGA-44-7669	0	0	226		TCGA-BB-8596	0	0	46		TCGA-EO-A3B1	0	0	22		TCGA-A5-A0GE	0	0	10
TCGA-EB-A4XL	0	0	226		TCGA-BB-A6UO	0	0	46		TCGA-EO-A3KU	0	0	22		TCGA-B5-A0JS	0	0	10
TCGA-EY-A2OP	1	1	226		TCGA-CN-4729	0	0	46		TCGA-EY-A2OO	0	0	22		TCGA-BK-A6W4	0	0	10
TCGA-BT-A2LB	0	0	225		TCGA-CV-5439	0	0	46		TCGA-SJ-A6ZJ	0	0	22		TCGA-K6-A3WQ	0	0	10
TCGA-XF-AAN2	0	0	225		TCGA-CV-6938	0	0	46		TCGA-OR-A5L6	0	0	21		TCGA-VD-A8KA	0	0	10
TCGA-MA-AA42	0	0	225		TCGA-CV-7255	0	0	46		TCGA-PK-A5HA	0	0	21		TCGA-V4-A9EC	0	0	10
TCGA-56-8305	0	0	225		TCGA-D6-8568	0	0	46		TCGA-GV-A3QG	0	0	21		TCGA-V4-A9E7	0	0	10
TCGA-XF-A9SY	0	0	224		TCGA-BP-4964	0	0	46		TCGA-CS-6666	0	0	21		TCGA-OR-A5JT	0	0	9
TCGA-AA-3833	0	0	224		TCGA-CZ-4859	0	0	46		TCGA-DU-7298	0	0	21		TCGA-OR-A5K3	0	0	9
TCGA-55-7576	0	0	224		TCGA-B9-A69E	0	0	46		TCGA-DU-7300	0	0	21		TCGA-OR-A5KV	0	0	9
TCGA-MN-A4N1	0	0	224		TCGA-DD-AACC	0	0	46		TCGA-DU-8161	0	0	21		TCGA-OR-A5KZ	0	0	9
TCGA-22-5479	0	0	222		TCGA-EP-A3JL	0	0	46		TCGA-E1-A7YE	0	0	21		TCGA-OR-A5L3	0	0	9
TCGA-EB-A3XB	0	0	222		TCGA-FV-A2QR	0	0	46		TCGA-HT-A5R9	0	0	21		TCGA-OR-A5L4	0	0	9
TCGA-50-5933	0	0	221		TCGA-NJ-A4YG	0	0	46		TCGA-IK-8125	0	0	21		TCGA-OR-A5LE	0	0	9
TCGA-77-7463	0	0	221		TCGA-22-4605	0	0	46		TCGA-P5-A72W	0	0	21		TCGA-OR-A5LG	0	0	9
TCGA-77-8140	0	0	221		TCGA-63-7023	0	0	46		TCGA-A1-A0SF	0	0	21		TCGA-OR-A5LM	0	0	9
TCGA-NC-A5HJ	0	0	221		TCGA-77-8138	0	0	46		TCGA-A7-A0CG	0	0	21		TCGA-OR-A5LP	0	0	9
TCGA-4Z-AA7R	1	1	220		TCGA-NK-A7XE	0	0	46		TCGA-A8-A07J	0	0	21		TCGA-CF-A7I0	0	0	9
TCGA-AP-A1E1	0	0	220		TCGA-13-1498	0	0	46		TCGA-AO-A1KT	0	0	21		TCGA-CF-A9FM	0	0	9
TCGA-B5-A0JZ	0	0	220		TCGA-24-1103	0	0	46		TCGA-AR-A0U0	0	0	21		TCGA-FD-A5BS	0	0	9
TCGA-55-7281	0	0	219		TCGA-59-2352	0	0	46		TCGA-AR-A24Z	0	0	21		TCGA-DB-A64R	0	0	9
TCGA-MN-A4N5	0	0	219		TCGA-61-2111	0	0	46		TCGA-B6-A0X5	0	0	21		TCGA-DU-6397	0	0	9
TCGA-MF-A522	0	0	218		TCGA-LI-A9QH	1	1	46		TCGA-BH-A0DS	0	0	21		TCGA-DU-6407	0	0	9
TCGA-D1-A101	0	0	218		TCGA-VQ-A8E0	0	0	46		TCGA-BH-A203	0	0	21		TCGA-DU-A6S3	0	0	9
TCGA-E7-A85H	0	0	217		TCGA-AJ-A3BD	0	0	46		TCGA-D8-A1X5	0	0	21		TCGA-E1-5311	0	0	9
TCGA-AZ-4615	0	0	217		TCGA-AX-A3GB	0	0	46		TCGA-D8-A27R	0	0	21		TCGA-E1-A7Z3	0	0	9
TCGA-69-A59K	0	0	217		TCGA-BG-A187	0	0	46		TCGA-E2-A15E	0	0	21		TCGA-E1-A7Z4	0	0	9
TCGA-85-A4JB	0	0	217		TCGA-BL-A0C8	0	0	45		TCGA-E2-A15S	0	0	21		TCGA-FG-7634	0	0	9
TCGA-BF-A3DM	0	0	217		TCGA-A7-A13D	0	0	45		TCGA-E2-A1B1	0	0	21		TCGA-FG-7638	0	0	9
TCGA-AP-A1DO	0	0	217		TCGA-AO-A0J3	0	0	45		TCGA-E2-A1IG	0	0	21		TCGA-FG-8187	0	0	9
TCGA-AX-A3G9	0	0	217		TCGA-AR-A1AH	0	0	45		TCGA-E9-A1RB	0	0	21		TCGA-FG-A4MY	0	0	9
TCGA-NC-A5HI	0	0	215		TCGA-AR-A1AO	0	0	45		TCGA-EW-A423	0	0	21		TCGA-HT-7473	1	1	9
TCGA-AP-A1DP	0	0	215		TCGA-AR-A250	0	0	45		TCGA-S3-A6ZG	0	0	21		TCGA-HT-7474	0	0	9
TCGA-DK-A1A3	1	1	214		TCGA-C5-A1BI	0	0	45		TCGA-EA-A411	0	0	21		TCGA-HT-7485	0	0	9
TCGA-BG-A0M4	0	0	213		TCGA-C5-A1M6	0	0	45		TCGA-EA-A5O9	0	0	21		TCGA-HT-7608	0	0	9
TCGA-99-8025	0	0	212		TCGA-C5-A7CK	1	1	45		TCGA-VS-A957	0	0	21		TCGA-HT-7884	0	0	9
TCGA-34-8454	0	0	212		TCGA-LP-A4AW	0	0	45		TCGA-VS-A9V0	0	0	21		TCGA-HT-8018	0	0	9
TCGA-BF-A3DL	0	0	212		TCGA-VS-A9UB	0	0	45		TCGA-3X-AAVE	0	0	21		TCGA-HT-8114	0	0	9
TCGA-ZB-A966	1	1	212		TCGA-AF-2687	0	0	45		TCGA-CI-6620	0	0	21		TCGA-HT-8563	0	0	9
TCGA-NC-A5HD	0	0	211		TCGA-AG-3894	0	0	45		TCGA-A6-6649	0	0	21		TCGA-HT-A4DV	0	0	9
TCGA-BG-A0LX	0	0	211		TCGA-AG-4022	0	0	45		TCGA-JY-A938	0	0	21		TCGA-HT-A616	0	0	9
TCGA-D1-A16F	0	0	211		TCGA-AH-6643	0	0	45		TCGA-28-5216	1	1	21		TCGA-HW-A5KM	0	0	9
TCGA-99-8028	0	0	210		TCGA-DY-A0XA	0	0	45		TCGA-41-2572	0	0	21		TCGA-P5-A731	0	0	9
TCGA-91-6829	0	0	209		TCGA-AA-3851	1	1	45		TCGA-41-3915	0	0	21		TCGA-P5-A735	0	0	9
TCGA-60-2714	0	0	209		TCGA-AY-5543	0	0	45		TCGA-RR-A6KB	0	0	21		TCGA-P5-A77X	0	0	9
TCGA-44-A479	0	0	208		TCGA-AZ-5403	0	0	45		TCGA-06-0168	0	0	21		TCGA-QH-A65R	0	0	9
TCGA-55-6969	0	0	208		TCGA-CM-4747	0	0	45		TCGA-BB-8601	0	0	21		TCGA-QH-A6CZ	0	0	9
TCGA-64-5775	1	1	208		TCGA-D5-6529	0	0	45		TCGA-CQ-6222	0	0	21		TCGA-RY-A843	0	0	9
TCGA-86-8279	0	0	208		TCGA-D5-6541	0	0	45		TCGA-CV-6950	0	0	21		TCGA-S9-A6WG	1	1	9
TCGA-52-7810	0	0	208		TCGA-NH-A50U	0	0	45		TCGA-CV-7180	0	0	21		TCGA-S9-A7R1	0	0	9
TCGA-68-A59J	0	0	208		TCGA-R6-A8WG	0	0	45		TCGA-DQ-5630	0	0	21		TCGA-S9-A7R4	0	0	9
TCGA-85-6560	0	0	208		TCGA-CN-A63V	0	0	45		TCGA-HD-7754	0	0	21		TCGA-TM-A84T	0	0	9
TCGA-BA-4078	0	0	206		TCGA-CV-6933	0	0	45		TCGA-P3-A5QE	0	0	21		TCGA-TQ-A7RG	0	0	9
TCGA-69-7765	0	0	206		TCGA-CV-6953	0	0	45		TCGA-QK-A6IJ	0	0	21		TCGA-VM-A8CF	0	0	9
TCGA-NC-A5HN	0	0	206		TCGA-CV-7102	0	0	45		TCGA-KL-8324	0	0	21		TCGA-3C-AAAU	0	0	9
TCGA-XF-AAML	1	1	205		TCGA-D6-A6EM	0	0	45		TCGA-A3-3322	0	0	21		TCGA-A2-A0ES	0	0	9
TCGA-55-8094	0	0	205		TCGA-F7-A61S	0	0	45		TCGA-A3-3347	0	0	21		TCGA-A2-A0EW	0	0	9
TCGA-99-7458	0	0	205		TCGA-QK-AA3K	0	0	45		TCGA-A3-3365	0	0	21		TCGA-A2-A1FX	0	0	9
TCGA-DK-AA6L	0	0	204		TCGA-TN-A7HJ	0	0	45		TCGA-B0-4706	1	1	21		TCGA-A2-A259	0	0	9
TCGA-56-6546	0	0	204		TCGA-UF-A7JF	0	0	45		TCGA-B0-4842	0	0	21		TCGA-A7-A0D9	0	0	9
TCGA-G2-AA3B	0	0	203		TCGA-A3-A8OV	0	0	45		TCGA-B0-5081	1	1	21		TCGA-A8-A091	0	0	9
TCGA-55-6985	0	0	203		TCGA-B1-A47M	0	0	45		TCGA-B0-5096	0	0	21		TCGA-A8-A0AD	0	0	9
TCGA-55-7995	0	0	203		TCGA-BQ-5878	0	0	45		TCGA-B0-5104	0	0	21		TCGA-AC-A7VB	0	0	9
TCGA-AX-A05S	1	1	203		TCGA-G7-A8LB	0	0	45		TCGA-B8-A54D	0	0	21		TCGA-AO-A0JG	0	0	9
TCGA-D1-A1NY	0	0	203		TCGA-GL-7773	0	0	45		TCGA-BP-4960	0	0	21		TCGA-AQ-A54O	0	0	9
TCGA-QK-A8Z8	0	0	202		TCGA-BC-A217	0	0	45		TCGA-BP-4965	0	0	21		TCGA-AR-A5QM	0	0	9
TCGA-B5-A11R	0	0	201		TCGA-DD-AADP	0	0	45		TCGA-BP-4974	0	0	21		TCGA-B6-A0I5	0	0	9
TCGA-B5-A1MW	0	0	201		TCGA-50-5932	0	0	45		TCGA-CJ-5678	1	1	21		TCGA-B6-A0IH	0	0	9
TCGA-E6-A2P8	1	1	201		TCGA-55-6642	0	0	45		TCGA-DV-5566	0	0	21		TCGA-BH-A0B9	0	0	9
TCGA-55-8620	0	0	200		TCGA-78-7167	0	0	45		TCGA-A4-7286	0	0	21		TCGA-BH-A1FE	0	0	9
TCGA-21-5783	0	0	200		TCGA-04-1356	0	0	45		TCGA-A4-7583	0	0	21		TCGA-BH-A1FG	0	0	9
TCGA-RD-A8NB	0	0	200		TCGA-24-1474	0	0	45		TCGA-BQ-7062	0	0	21		TCGA-BH-A1FL	0	0	9
TCGA-N7-A4Y0	0	0	200		TCGA-25-2392	0	0	45		TCGA-G7-6796	0	0	21		TCGA-C8-A1HF	0	0	9
TCGA-A5-A2K7	0	0	200		TCGA-29-1703	0	0	45		TCGA-IA-A83T	0	0	21		TCGA-E2-A1B4	0	0	9
TCGA-AP-A0LT	1	1	200		TCGA-59-2363	0	0	45		TCGA-UZ-A9PV	0	0	21		TCGA-E2-A1IF	0	0	9
TCGA-FD-A43P	0	0	199		TCGA-HC-8216	0	0	45		TCGA-Y8-A8RY	0	0	21		TCGA-E2-A1IL	0	0	9
TCGA-Q1-A5R2	0	0	199		TCGA-FW-A5DX	0	0	45		TCGA-Y8-A8RZ	0	0	21		TCGA-E2-A1IO	0	0	9
TCGA-93-8067	0	0	199		TCGA-3M-AB47	0	0	45		TCGA-DD-A39W	0	0	21		TCGA-E9-A1N5	0	0	9
TCGA-58-A46M	0	0	199		TCGA-FP-A8CX	0	0	45		TCGA-DD-AADY	0	0	21		TCGA-E9-A1NI	0	0	9
TCGA-PE-A5DE	0	0	198		TCGA-VQ-A91U	0	0	45		TCGA-DD-AAVZ	0	0	21		TCGA-E9-A1RD	0	0	9
TCGA-UC-A7PF	0	0	198		TCGA-VQ-AA6B	0	0	45		TCGA-GJ-A6C0	0	0	21		TCGA-EW-A1P7	0	0	9
TCGA-VS-A9U6	0	0	198		TCGA-VQ-AA6I	0	0	45		TCGA-ZS-A9CE	0	0	21		TCGA-OL-A5D8	0	0	9
TCGA-55-7570	0	0	198		TCGA-B5-A11L	0	0	45		TCGA-50-6673	0	0	21		TCGA-OL-A5RX	0	0	9
TCGA-95-7947	0	0	198		TCGA-DI-A2QY	0	0	45		TCGA-86-6562	0	0	21		TCGA-V7-A7HQ	0	0	9
TCGA-99-8032	0	0	198		TCGA-FI-A3PX	0	0	45		TCGA-L9-A50W	0	0	21		TCGA-EK-A2RL	0	0	9
TCGA-33-4583	0	0	198		TCGA-CF-A47V	0	0	44		TCGA-43-6773	0	0	21		TCGA-JW-A5VG	0	0	9
TCGA-56-8307	0	0	198		TCGA-XF-A8HC	0	0	44		TCGA-3U-A98I	0	0	21		TCGA-W5-AA2O	0	0	9
TCGA-HQ-A5NE	0	0	197		TCGA-A2-A0D0	0	0	44		TCGA-MQ-A6BS	1	1	21		TCGA-AA-A00Z	0	0	9
TCGA-05-4405	0	0	197		TCGA-A2-A0YH	0	0	44		TCGA-61-2002	0	0	21		TCGA-27-2528	0	0	9
TCGA-LP-A4AV	0	0	196		TCGA-AC-A23C	0	0	44		TCGA-HZ-A4BH	0	0	21		TCGA-32-2615	0	0	9
TCGA-49-4487	1	1	196		TCGA-AC-A2BK	0	0	44		TCGA-IB-7647	0	0	21		TCGA-D6-6515	0	0	9
TCGA-GN-A263	0	0	196		TCGA-AN-A0AR	0	0	44		TCGA-IB-AAUO	0	0	21		TCGA-UP-A6WW	0	0	9
TCGA-D1-A17M	0	0	196		TCGA-BH-A1FU	0	0	44		TCGA-EJ-A46G	0	0	21		TCGA-KL-8338	0	0	9
TCGA-DK-AA6R	0	0	195		TCGA-C8-A12Q	0	0	44		TCGA-EJ-A65D	0	0	21		TCGA-KL-8345	0	0	9
TCGA-44-4112	0	0	195		TCGA-E9-A1RH	0	0	44		TCGA-HC-7078	0	0	21		TCGA-KN-8419	0	0	9
TCGA-50-5045	0	0	195		TCGA-LL-A5YP	0	0	44		TCGA-HC-7752	0	0	21		TCGA-KN-8434	0	0	9
TCGA-50-5941	1	1	195		TCGA-FU-A3NI	0	0	44		TCGA-J4-A83J	0	0	21		TCGA-B0-4810	0	0	9
TCGA-39-5034	0	0	195		TCGA-R2-A69V	0	0	44		TCGA-KK-A59Z	0	0	21		TCGA-B0-5710	0	0	9
TCGA-43-2578	0	0	195		TCGA-VS-A9UZ	0	0	44		TCGA-KK-A6E3	0	0	21		TCGA-BP-4163	0	0	9
TCGA-XF-A9SI	0	0	194		TCGA-AF-A56K	0	0	44		TCGA-KK-A6E8	0	0	21		TCGA-BP-4167	0	0	9
TCGA-55-8092	0	0	194		TCGA-CL-4957	0	0	44		TCGA-KK-A8I5	0	0	21		TCGA-CJ-4900	0	0	9
TCGA-55-A48X	0	0	194		TCGA-A6-3807	0	0	44		TCGA-ZG-A9LB	0	0	21		TCGA-5P-A9KH	0	0	9
TCGA-78-7146	0	0	194		TCGA-AD-6963	0	0	44		TCGA-DX-A3U7	0	0	21		TCGA-A4-7828	0	0	9
TCGA-AX-A2IO	0	0	194		TCGA-AM-5820	0	0	44		TCGA-DX-A3UF	0	0	21		TCGA-DW-5560	0	0	9
TCGA-QK-A6VB	0	0	193		TCGA-AY-A71X	0	0	44		TCGA-DX-A6YS	1	1	21		TCGA-IA-A40X	0	0	9
TCGA-66-2759	0	0	193		TCGA-CM-6170	0	0	44		TCGA-IE-A6BZ	0	0	21		TCGA-J7-8537	0	0	9
TCGA-6A-AB49	0	0	193		TCGA-CM-6172	0	0	44		TCGA-X2-A95T	0	0	21		TCGA-55-8206	0	0	9
TCGA-92-7340	0	0	193		TCGA-G4-6297	0	0	44		TCGA-X6-A7W8	0	0	21		TCGA-62-8397	0	0	9
TCGA-94-A4VJ	0	0	193		TCGA-GR-A4D9	0	0	44		TCGA-X6-A7WD	0	0	21		TCGA-97-8175	0	0	9
TCGA-AP-A0LE	0	0	193		TCGA-CR-7377	0	0	44		TCGA-3S-A8YW	0	0	21		TCGA-SC-A6LP	0	0	9
TCGA-BT-A20J	0	0	192		TCGA-CV-5966	0	0	44		TCGA-N6-A4VC	0	0	21		TCGA-SC-AA5Z	0	0	9
TCGA-55-8616	0	0	192		TCGA-CV-7430	0	0	44		TCGA-NA-A4R0	0	0	21		TCGA-SH-A7BD	1	1	9
TCGA-91-A4BC	0	0	192		TCGA-A3-3387	0	0	44		TCGA-A5-A0GJ	0	0	21		TCGA-SH-A9CT	0	0	9
TCGA-NJ-A4YP	0	0	192		TCGA-B0-5713	0	0	44		TCGA-A5-A0R9	0	0	21		TCGA-UD-AABZ	0	0	9
TCGA-77-A5G6	0	0	192		TCGA-CW-5580	1	1	44		TCGA-AJ-A23N	0	0	21		TCGA-UT-A97Y	0	0	9
TCGA-BF-A5EQ	0	0	192		TCGA-2Z-A9JK	0	0	44		TCGA-AP-A1E3	0	0	21		TCGA-ZN-A9VS	0	0	9
TCGA-EB-A3XF	0	0	192		TCGA-4A-A93W	0	0	44		TCGA-B5-A0JT	0	0	21		TCGA-24-1565	0	0	9
TCGA-BA-6869	0	0	190		TCGA-5P-A9KE	0	0	44		TCGA-BG-A0MI	0	0	21		TCGA-13-0899	0	0	9
TCGA-50-5946	0	0	190		TCGA-B9-A44B	1	1	44		TCGA-BG-A0W1	0	0	21		TCGA-2J-AAB9	0	0	9
TCGA-AX-A2IN	0	0	190		TCGA-SX-A7SS	0	0	44		TCGA-BK-A0CB	0	0	21		TCGA-3A-A9IJ	0	0	9
TCGA-BH-A2L8	0	0	189		TCGA-2Y-A9H7	0	0	44		TCGA-BS-A0TG	0	0	21		TCGA-HZ-7925	0	0	9
TCGA-73-4658	1	1	189		TCGA-DD-A73D	0	0	44		TCGA-QS-A744	0	0	21		TCGA-IB-A5SO	0	0	9
TCGA-97-7554	0	0	189		TCGA-DD-AACK	0	0	44		TCGA-FD-A3B8	0	0	20		TCGA-IB-A5SP	0	0	9
TCGA-33-AASB	0	0	189		TCGA-ES-A2HT	0	0	44		TCGA-SY-A9G0	0	0	20		TCGA-RB-AA9M	0	0	9
TCGA-43-2576	0	0	189		TCGA-G3-AAV4	0	0	44		TCGA-XF-A9T4	0	0	20		TCGA-S4-A8RP	0	0	9
TCGA-FR-A728	0	0	189		TCGA-ZS-A9CF	0	0	44		TCGA-DB-5274	0	0	20		TCGA-PR-A5PF	0	0	9
TCGA-K4-A5RJ	0	0	188		TCGA-18-3407	0	0	44		TCGA-DB-A75L	0	0	20		TCGA-QR-A6GU	0	0	9
TCGA-55-5899	0	0	188		TCGA-56-7582	0	0	44		TCGA-DH-A7UU	0	0	20		TCGA-S7-A7X0	0	0	9
TCGA-21-5786	0	0	188		TCGA-04-1343	0	0	44		TCGA-DH-A7UV	0	0	20		TCGA-SP-A6QF	0	0	9
TCGA-85-A5B5	0	0	188		TCGA-25-1313	0	0	44		TCGA-DU-6396	1	1	20		TCGA-W2-A7UY	0	0	9
TCGA-BG-A3EW	0	0	187		TCGA-2J-AABP	0	0	44		TCGA-DU-6401	0	0	20		TCGA-WB-A80K	0	0	9
TCGA-BS-A0U8	0	0	187		TCGA-FX-A3RE	0	0	44		TCGA-E1-A7YV	0	0	20		TCGA-WB-A80Q	0	0	9
TCGA-D1-A160	0	0	187		TCGA-BF-A3DN	0	0	44		TCGA-FG-5965	0	0	20		TCGA-WB-A81D	0	0	9
TCGA-ZF-AA4W	0	0	186		TCGA-AX-A3FV	0	0	44		TCGA-HT-8104	0	0	20		TCGA-2A-A8VL	0	0	9
TCGA-CV-7245	0	0	185		TCGA-B5-A11O	0	0	44		TCGA-HT-A5RA	0	0	20		TCGA-CH-5741	0	0	9
TCGA-MP-A4T4	0	0	185		TCGA-D1-A1NU	0	0	44		TCGA-IK-7675	0	0	20		TCGA-CH-5744	0	0	9
TCGA-56-7731	0	0	185		TCGA-E7-A7PW	0	0	43		TCGA-QH-A6CW	0	0	20		TCGA-CH-5753	0	0	9
TCGA-DK-A3IS	0	0	184		TCGA-FD-A6TI	0	0	43		TCGA-TM-A84I	0	0	20		TCGA-EJ-5501	0	0	9
TCGA-64-5778	0	0	184		TCGA-HQ-A5ND	0	0	43		TCGA-3C-AALK	0	0	20		TCGA-EJ-5510	0	0	9
TCGA-73-4670	0	0	184		TCGA-XF-A8HB	0	0	43		TCGA-A2-A3XV	0	0	20		TCGA-EJ-5522	0	0	9
TCGA-92-8063	0	0	184		TCGA-XF-AAMR	0	0	43		TCGA-A8-A06P	0	0	20		TCGA-EJ-7785	0	0	9
TCGA-XF-AAN0	0	0	183		TCGA-ZF-A9R3	0	0	43		TCGA-A8-A08T	0	0	20		TCGA-EJ-8468	0	0	9
TCGA-IR-A3LL	0	0	182		TCGA-A2-A25A	0	0	43		TCGA-AC-A8OS	0	0	20		TCGA-EJ-AB27	0	0	9
TCGA-22-4595	0	0	182		TCGA-AC-A2B8	0	0	43		TCGA-AO-A0JB	0	0	20		TCGA-G9-6339	0	0	9
TCGA-33-4586	0	0	182		TCGA-D8-A1X9	0	0	43		TCGA-B6-A0RV	0	0	20		TCGA-G9-6356	0	0	9
TCGA-AX-A06H	0	0	182		TCGA-EA-A3HQ	0	0	43		TCGA-BH-A0BA	0	0	20		TCGA-G9-6494	0	0	9
TCGA-CR-5248	0	0	181		TCGA-AG-3887	0	0	43		TCGA-BH-A0BT	0	0	20		TCGA-G9-A9S0	0	0	9
TCGA-95-A4VN	0	0	181		TCGA-AA-3678	1	1	43		TCGA-BH-A0EB	0	0	20		TCGA-HC-7075	0	0	9
TCGA-90-7964	0	0	181		TCGA-AA-3681	0	0	43		TCGA-BH-A0HL	0	0	20		TCGA-HC-7210	0	0	9
TCGA-D1-A163	0	0	181		TCGA-AA-3850	0	0	43		TCGA-D8-A1JF	0	0	20		TCGA-HC-7817	0	0	9
TCGA-DD-AACI	0	0	180		TCGA-AA-A02W	0	0	43		TCGA-D8-A1JM	0	0	20		TCGA-HI-7170	0	0	9
TCGA-33-AASI	0	0	180		TCGA-AZ-6606	0	0	43		TCGA-E2-A15C	0	0	20		TCGA-J4-A67S	0	0	9
TCGA-EY-A548	0	0	180		TCGA-CM-6161	0	0	43		TCGA-E2-A15R	0	0	20		TCGA-J4-A6G3	0	0	9
TCGA-K4-A6FZ	0	0	179		TCGA-DM-A282	0	0	43		TCGA-E9-A228	0	0	20		TCGA-J4-A83L	0	0	9
TCGA-HT-8564	0	0	179		TCGA-5M-AATA	0	0	43		TCGA-EW-A1J2	0	0	20		TCGA-J9-A8CP	0	0	9
TCGA-53-7626	0	0	179		TCGA-FA-A4BB	0	0	43		TCGA-EW-A1PH	0	0	20		TCGA-KC-A4BL	0	0	9
TCGA-56-8308	0	0	179		TCGA-LN-A4MR	0	0	43		TCGA-EW-A2FR	0	0	20		TCGA-KC-A4BN	0	0	9
TCGA-66-2763	0	0	179		TCGA-16-1045	0	0	43		TCGA-EK-A2R9	0	0	20		TCGA-KK-A7AV	0	0	9
TCGA-4Z-AA7W	0	0	178		TCGA-19-1390	0	0	43		TCGA-W5-AA2X	0	0	20		TCGA-KK-A7B1	1	1	9
TCGA-AC-A5XS	1	1	178		TCGA-06-0743	0	0	43		TCGA-ZH-A8Y2	0	0	20		TCGA-KK-A7B2	0	0	9
TCGA-GS-A9TZ	0	0	178		TCGA-CR-7404	0	0	43		TCGA-A6-2671	0	0	20		TCGA-KK-A8IH	0	0	9
TCGA-UF-A71D	0	0	178		TCGA-CX-7085	0	0	43		TCGA-FF-A7CW	0	0	20		TCGA-QU-A6IN	0	0	9
TCGA-55-7913	0	0	178		TCGA-IQ-A61H	0	0	43		TCGA-02-2483	0	0	20		TCGA-V1-A8MJ	0	0	9
TCGA-75-6211	0	0	178		TCGA-MT-A67A	0	0	43		TCGA-02-2485	0	0	20		TCGA-V1-A8WN	0	0	9
TCGA-97-7938	0	0	178		TCGA-BP-5173	0	0	43		TCGA-06-5408	0	0	20		TCGA-V1-A9OY	0	0	9
TCGA-22-5472	0	0	178		TCGA-CZ-5451	0	0	43		TCGA-19-A6J5	0	0	20		TCGA-VN-A88R	0	0	9
TCGA-96-7544	0	0	178		TCGA-A4-A6HP	0	0	43		TCGA-27-1837	0	0	20		TCGA-X4-A8KS	0	0	9
TCGA-BG-A0VW	0	0	178		TCGA-MH-A55Z	0	0	43		TCGA-28-5207	0	0	20		TCGA-XA-A8JR	0	0	9
TCGA-D1-A17D	0	0	178		TCGA-2Y-A9GS	0	0	43		TCGA-14-0787	0	0	20		TCGA-YL-A8SA	0	0	9
TCGA-FD-A3SS	0	0	177		TCGA-DD-AADU	0	0	43		TCGA-14-0781	0	0	20		TCGA-YL-A9WJ	0	0	9
TCGA-D5-6931	0	0	177		TCGA-50-5051	0	0	43		TCGA-CN-4737	0	0	20		TCGA-ZG-A8QW	0	0	9
TCGA-33-4532	0	0	177		TCGA-50-8459	0	0	43		TCGA-CN-6996	0	0	20		TCGA-ZG-A8QZ	0	0	9
TCGA-34-5928	0	0	177		TCGA-55-6971	0	0	43		TCGA-CR-6467	0	0	20		TCGA-DX-A3U8	0	0	9
TCGA-NK-A5CT	0	0	177		TCGA-86-A4P7	0	0	43		TCGA-CR-6493	0	0	20		TCGA-DX-A48J	0	0	9
TCGA-BF-A1PV	0	0	177		TCGA-95-8039	0	0	43		TCGA-DQ-7591	0	0	20		TCGA-DX-A6BG	0	0	9
TCGA-G2-A3IE	0	0	176		TCGA-66-2777	0	0	43		TCGA-P3-A6T2	0	0	20		TCGA-QQ-A5V2	0	0	9
TCGA-P3-A5QF	0	0	176		TCGA-85-8479	0	0	43		TCGA-UF-A7JC	0	0	20		TCGA-SI-A71Q	0	0	9
TCGA-63-A5MS	0	0	176		TCGA-24-1846	0	0	43		TCGA-A3-3383	1	1	20		TCGA-2G-AAEW	0	0	9
TCGA-77-7337	0	0	176		TCGA-29-1783	0	0	43		TCGA-B0-5107	0	0	20		TCGA-2G-AAEX	0	0	9
TCGA-AP-A0LD	0	0	176		TCGA-2L-AAQJ	0	0	43		TCGA-B8-A7U6	0	0	20		TCGA-2G-AAFG	0	0	9
TCGA-63-6202	0	0	175		TCGA-BG-A0YV	0	0	43		TCGA-BP-5196	0	0	20		TCGA-2G-AAFL	0	0	9
TCGA-98-A53I	0	0	175		TCGA-4Z-AA82	0	0	42		TCGA-BP-5200	0	0	20		TCGA-2G-AAFM	0	0	9
TCGA-55-8203	0	0	174		TCGA-4Z-AA83	0	0	42		TCGA-BP-5202	0	0	20		TCGA-2G-AAFZ	0	0	9
TCGA-37-4141	0	0	174		TCGA-DK-A1AF	1	1	42		TCGA-CZ-5470	1	1	20		TCGA-2G-AAGT	0	0	9
TCGA-39-5040	0	0	174		TCGA-FD-A3SL	0	0	42		TCGA-CZ-5982	0	0	20		TCGA-2G-AAKG	0	0	9
TCGA-B5-A0JV	0	0	174		TCGA-GD-A3OQ	0	0	42		TCGA-EU-5907	0	0	20		TCGA-2G-AAL7	0	0	9
TCGA-DK-A3IT	0	0	173		TCGA-GV-A40G	0	0	42		TCGA-2Z-A9J6	0	0	20		TCGA-SB-A76C	0	0	9
TCGA-E7-A541	0	0	173		TCGA-K4-A4AB	0	0	42		TCGA-5P-A9JZ	0	0	20		TCGA-ZM-AA0N	0	0	9
TCGA-G2-A3VY	1	1	173		TCGA-PQ-A6FN	0	0	42		TCGA-A4-8630	0	0	20		TCGA-X7-A8D8	0	0	9
TCGA-EK-A2RJ	0	0	173		TCGA-A8-A06Z	0	0	42		TCGA-AL-3472	0	0	20		TCGA-X7-A8DJ	0	0	9
TCGA-95-7562	0	0	173		TCGA-A8-A08H	0	0	42		TCGA-BQ-5884	0	0	20		TCGA-X7-A8M3	0	0	9
TCGA-QQ-A5VD	0	0	173		TCGA-AR-A0TS	0	0	42		TCGA-UZ-A9Q0	0	0	20		TCGA-XM-A8RC	0	0	9
TCGA-A5-A0VQ	0	0	173		TCGA-BH-A0B4	0	0	42		TCGA-WN-A9G9	0	0	20		TCGA-XU-A930	0	0	9
TCGA-DQ-5629	0	0	172		TCGA-BH-A0WA	0	0	42		TCGA-DD-A11B	0	0	20		TCGA-YT-A95F	0	0	9
TCGA-MT-A67F	0	0	172		TCGA-C8-A12L	0	0	42		TCGA-ED-A66X	0	0	20		TCGA-ZB-A96C	0	0	9
TCGA-05-4249	0	0	172		TCGA-D8-A140	0	0	42		TCGA-WX-AA47	0	0	20		TCGA-ZB-A96D	0	0	9
TCGA-MP-A4SV	0	0	172		TCGA-D8-A1XJ	0	0	42		TCGA-55-7284	0	0	20		TCGA-ZC-AAAF	0	0	9
TCGA-DK-A3IU	0	0	171		TCGA-E9-A226	0	0	42		TCGA-55-A48Z	0	0	20		TCGA-BJ-A28S	0	0	9
TCGA-FD-A43X	0	0	171		TCGA-E9-A244	1	1	42		TCGA-62-8402	0	0	20		TCGA-BJ-A290	0	0	9
TCGA-05-5425	0	0	171		TCGA-ZJ-AB0I	0	0	42		TCGA-91-8496	0	0	20		TCGA-DJ-A1QG	0	0	9
TCGA-97-A4M7	1	1	171		TCGA-AF-5654	0	0	42		TCGA-91-8497	0	0	20		TCGA-DJ-A2Q9	0	0	9
TCGA-33-AASL	1	1	171		TCGA-AG-4008	0	0	42		TCGA-85-A50M	0	0	20		TCGA-DJ-A4UT	0	0	9
TCGA-56-7222	0	0	171		TCGA-A6-6652	0	0	42		TCGA-LK-A4NY	0	0	20		TCGA-E8-A437	0	0	9
TCGA-YZ-A985	0	0	171		TCGA-A6-6654	0	0	42		TCGA-24-1419	0	0	20		TCGA-EL-A3GP	0	0	9
TCGA-ZF-A9RL	0	0	170		TCGA-AA-3968	0	0	42		TCGA-29-1774	0	0	20		TCGA-EL-A3H5	0	0	9
TCGA-DD-A3A9	0	0	170		TCGA-G4-6307	0	0	42		TCGA-VG-A8LO	0	0	20		TCGA-EL-A3H7	0	0	9
TCGA-22-1016	0	0	170		TCGA-2H-A9GO	0	0	42		TCGA-2L-AAQM	0	0	20		TCGA-EL-A3T3	0	0	9
TCGA-OR-A5JB	0	0	169		TCGA-JY-A93D	0	0	42		TCGA-FB-AAQ1	0	0	20		TCGA-EL-A3TB	0	0	9
TCGA-DK-A3IN	0	0	169		TCGA-L5-A4OO	0	0	42		TCGA-FB-AAQ3	0	0	20		TCGA-EM-A3FR	0	0	9
TCGA-FD-A62P	0	0	169		TCGA-LN-A9FR	0	0	42		TCGA-IB-7886	0	0	20		TCGA-ET-A3DW	0	0	9
TCGA-73-4666	1	1	169		TCGA-BA-A6DL	0	0	42		TCGA-IB-A5SQ	0	0	20		TCGA-FY-A3R9	0	0	9
TCGA-34-2600	1	1	169		TCGA-CN-5365	1	1	42		TCGA-IB-AAUP	0	0	20		TCGA-J8-A3YF	0	0	9
TCGA-VQ-A8P3	0	0	169		TCGA-CQ-6220	0	0	42		TCGA-M8-A5N4	0	0	20		TCGA-L6-A4EQ	0	0	9
TCGA-GU-AATP	0	0	168		TCGA-CR-6477	0	0	42		TCGA-CH-5748	0	0	20		TCGA-L6-A4EU	0	0	9
TCGA-EK-A2PG	1	1	168		TCGA-CV-6952	0	0	42		TCGA-EJ-7123	0	0	20		TCGA-N5-A4RS	0	0	9
TCGA-CR-7374	0	0	168		TCGA-CV-7097	0	0	42		TCGA-EJ-7317	0	0	20		TCGA-N9-A4Q3	0	0	9
TCGA-EY-A1GS	1	1	168		TCGA-CV-A6JN	0	0	42		TCGA-EJ-A65J	0	0	20		TCGA-AJ-A2QL	0	0	9
TCGA-A6-A565	0	0	167		TCGA-DQ-5624	1	1	42		TCGA-EJ-A8FN	0	0	20		TCGA-AX-A1CI	0	0	9
TCGA-33-AASD	0	0	167		TCGA-H7-A76A	0	0	42		TCGA-HC-7738	0	0	20		TCGA-B5-A0K0	0	0	9
TCGA-NC-A5HR	0	0	167		TCGA-IQ-A61I	0	0	42		TCGA-HC-7749	0	0	20		TCGA-BG-A0YU	0	0	9
TCGA-O2-A52S	0	0	167		TCGA-P3-A6T4	0	0	42		TCGA-KK-A7AY	0	0	20		TCGA-FI-A2CX	0	0	9
TCGA-D1-A17U	0	0	167		TCGA-BP-4985	0	0	42		TCGA-KK-A8IA	0	0	20		TCGA-V4-A9F8	0	0	9
TCGA-BT-A3PK	0	0	166		TCGA-BP-5176	0	0	42		TCGA-XK-AAJA	0	0	20		TCGA-VD-AA8O	0	0	9
TCGA-49-6767	0	0	166		TCGA-B9-A8YH	0	0	42		TCGA-Y6-A9XI	0	0	20		TCGA-V4-A9EK	0	0	9
TCGA-21-1082	0	0	166		TCGA-2Y-A9GW	0	0	42		TCGA-YL-A8HM	0	0	20		TCGA-WC-A88A	0	0	9
TCGA-22-4599	0	0	166		TCGA-2Y-A9HA	0	0	42		TCGA-ZG-A9L9	0	0	20		TCGA-VD-A8KJ	0	0	9
TCGA-56-7823	0	0	166		TCGA-BC-A10W	0	0	42		TCGA-ZG-A9LY	0	0	20		TCGA-VD-AA8P	0	0	9
TCGA-EJ-7782	0	0	166		TCGA-BW-A5NQ	0	0	42		TCGA-DX-A2J0	0	0	20		TCGA-OR-A5LN	0	0	8
TCGA-63-A5MB	1	1	165		TCGA-CC-A3MB	0	0	42		TCGA-DX-A3LS	0	0	20		TCGA-PK-A5H8	0	0	8
TCGA-GD-A3OP	0	0	164		TCGA-DD-A3A2	0	0	42		TCGA-DX-A3UA	0	0	20		TCGA-DB-A64O	0	0	8
TCGA-GU-A767	0	0	164		TCGA-DD-AACH	0	0	42		TCGA-DX-A3UE	0	0	20		TCGA-DU-6542	0	0	8
TCGA-D1-A1O7	0	0	164		TCGA-DD-AACV	0	0	42		TCGA-DX-A7EI	0	0	20		TCGA-DU-7011	0	0	8
TCGA-FJ-A3Z7	0	0	163		TCGA-DD-AAVP	0	0	42		TCGA-DX-A7EM	0	0	20		TCGA-DU-A6S2	0	0	8
TCGA-CN-A63W	0	0	163		TCGA-DD-AAW0	0	0	42		TCGA-DX-A8BR	0	0	20		TCGA-DU-A7T8	0	0	8
TCGA-22-A5C4	0	0	163		TCGA-EP-A2KC	0	0	42		TCGA-DX-A8BV	0	0	20		TCGA-DU-A7TC	0	0	8
TCGA-BS-A0TE	0	0	163		TCGA-GJ-A9DB	0	0	42		TCGA-IE-A3OV	0	0	20		TCGA-E1-A7YH	0	0	8
TCGA-37-4132	0	0	162		TCGA-67-3773	0	0	42		TCGA-IE-A4EJ	0	0	20		TCGA-FG-5964	0	0	8
TCGA-43-A474	0	0	162		TCGA-97-7941	1	1	42		TCGA-JV-A5VE	0	0	20		TCGA-FG-A4MT	0	0	8
TCGA-L3-A524	0	0	162		TCGA-13-1509	0	0	42		TCGA-JV-A5VF	0	0	20		TCGA-FG-A70Y	0	0	8
TCGA-BS-A0UL	0	0	162		TCGA-24-1417	0	0	42		TCGA-QQ-A5VB	0	0	20		TCGA-HT-7607	0	0	8
TCGA-BT-A42C	0	0	161		TCGA-24-1426	0	0	42		TCGA-RN-AAAQ	0	0	20		TCGA-HT-7610	0	0	8
TCGA-CV-5441	1	1	161		TCGA-59-2351	0	0	42		TCGA-SG-A849	0	0	20		TCGA-HT-7620	0	0	8
TCGA-WQ-A9G7	0	0	161		TCGA-13-0893	1	1	42		TCGA-ER-A2NB	0	0	20		TCGA-HT-7695	0	0	8
TCGA-37-3789	0	0	161		TCGA-D9-A3Z4	0	0	42		TCGA-IN-A6RI	0	0	20		TCGA-HT-7858	0	0	8
TCGA-60-2703	0	0	161		TCGA-AJ-A3NG	0	0	42		TCGA-2G-AAGG	0	0	20		TCGA-HT-8111	0	0	8
TCGA-60-2720	1	1	161		TCGA-AX-A05W	0	0	42		TCGA-XE-AAO4	0	0	20		TCGA-HT-8113	0	0	8
TCGA-70-6722	1	1	161		TCGA-FI-A2EW	0	0	42		TCGA-XU-A933	0	0	20		TCGA-HT-A74L	0	0	8
TCGA-PG-A6IB	1	1	161		TCGA-BT-A20X	0	0	41		TCGA-DJ-A3V7	0	0	20		TCGA-HW-7487	0	0	8
TCGA-EW-A1IZ	0	0	160		TCGA-CF-A3MI	0	0	41		TCGA-N5-A59F	0	0	20		TCGA-HW-7491	0	0	8
TCGA-LA-A446	0	0	160		TCGA-DK-A2I2	0	0	41		TCGA-N6-A4VF	0	0	20		TCGA-P5-A5F1	0	0	8
TCGA-NC-A5HP	0	0	160		TCGA-DK-AA6X	0	0	41		TCGA-N8-A4PI	0	0	20		TCGA-QH-A6X4	0	0	8
TCGA-CF-A1HS	1	1	159		TCGA-FD-A43U	0	0	41		TCGA-NA-A4R1	0	0	20		TCGA-S9-A6U2	0	0	8
TCGA-CN-4727	0	0	159		TCGA-UY-A8OD	0	0	41		TCGA-A5-A0R7	0	0	20		TCGA-S9-A6WD	0	0	8
TCGA-55-A48Y	1	1	159		TCGA-DU-8165	0	0	41		TCGA-A5-A0VO	0	0	20		TCGA-S9-A7J1	0	0	8
TCGA-85-8582	0	0	159		TCGA-E1-5307	0	0	41		TCGA-AP-A0LQ	0	0	20		TCGA-S9-A7QW	0	0	8
TCGA-EB-A6R0	0	0	159		TCGA-AC-A8OQ	0	0	41		TCGA-AX-A06B	0	0	20		TCGA-TM-A84O	0	0	8
TCGA-XF-A9SP	0	0	158		TCGA-AN-A04C	0	0	41		TCGA-AX-A0IU	0	0	20		TCGA-TQ-A7RV	0	0	8
TCGA-NJ-A4YI	0	0	158		TCGA-AR-A0TV	0	0	41		TCGA-AX-A2HH	0	0	20		TCGA-VM-A8CD	0	0	8
TCGA-33-6738	0	0	158		TCGA-B6-A0RG	0	0	41		TCGA-B5-A11I	0	0	20		TCGA-A7-A13G	0	0	8
TCGA-77-8136	1	1	158		TCGA-BH-A0DK	0	0	41		TCGA-B5-A3FH	0	0	20		TCGA-AC-A23E	0	0	8
TCGA-85-A4QQ	0	0	158		TCGA-BH-A1EN	0	0	41		TCGA-BG-A0LW	0	0	20		TCGA-AC-A2FO	0	0	8
TCGA-EB-A5SE	0	0	158		TCGA-BH-A1FN	0	0	41		TCGA-BK-A0CA	0	0	20		TCGA-AC-A3OD	0	0	8
TCGA-4Z-AA80	0	0	157		TCGA-BH-A209	0	0	41		TCGA-D1-A0ZN	1	1	20		TCGA-AN-A0XS	0	0	8
TCGA-68-8250	0	0	157		TCGA-OL-A5RW	0	0	41		TCGA-D1-A102	0	0	20		TCGA-AR-A2LO	0	0	8
TCGA-77-8144	0	0	157		TCGA-S3-AA10	0	0	41		TCGA-D1-A168	0	0	20		TCGA-B6-A0RN	0	0	8
TCGA-NC-A5HH	0	0	157		TCGA-EK-A2GZ	0	0	41		TCGA-D1-A17T	0	0	20		TCGA-B6-A1KC	0	0	8
TCGA-D1-A176	0	0	157		TCGA-EK-A2PI	0	0	41		TCGA-D1-A2G6	0	0	20		TCGA-BH-A0BS	0	0	8
TCGA-CV-7427	0	0	156		TCGA-EK-A2RM	0	0	41		TCGA-EY-A1GE	0	0	20		TCGA-BH-A0DD	0	0	8
TCGA-18-4083	0	0	156		TCGA-IR-A3LF	1	1	41		TCGA-EY-A1GH	0	0	20		TCGA-BH-A0EI	0	0	8
TCGA-37-3783	0	0	156		TCGA-ZJ-AAXB	0	0	41		TCGA-EY-A1GR	0	0	20		TCGA-BH-A0H0	0	0	8
TCGA-NK-A5CR	0	0	156		TCGA-AG-3591	0	0	41		TCGA-OR-A5KO	0	0	19		TCGA-BH-A0H3	0	0	8
TCGA-E7-A6MD	0	0	155		TCGA-AG-3898	0	0	41		TCGA-DB-A4XB	0	0	19		TCGA-BH-A0H9	0	0	8
TCGA-XF-A9T6	0	0	155		TCGA-DC-6158	0	0	41		TCGA-DH-5143	0	0	19		TCGA-BH-A1ET	0	0	8
TCGA-F4-6703	0	0	155		TCGA-A6-2675	0	0	41		TCGA-DU-5871	0	0	19		TCGA-BH-A1FR	0	0	8
TCGA-T2-A6X2	0	0	155		TCGA-A6-6137	0	0	41		TCGA-DU-6400	0	0	19		TCGA-BH-A201	0	0	8
TCGA-55-7910	0	0	155		TCGA-AA-3696	0	0	41		TCGA-DU-6402	0	0	19		TCGA-BH-A42U	0	0	8
TCGA-39-5016	0	0	155		TCGA-AA-3814	0	0	41		TCGA-DU-7006	0	0	19		TCGA-BH-A8FY	0	0	8
TCGA-A5-A0GH	0	0	155		TCGA-AA-A01T	0	0	41		TCGA-DU-7290	0	0	19		TCGA-C8-A12N	0	0	8
TCGA-EW-A1J5	1	1	154		TCGA-CM-6163	0	0	41		TCGA-DU-8158	0	0	19		TCGA-D8-A1JI	0	0	8
TCGA-ZJ-AAXU	0	0	154		TCGA-CM-6167	0	0	41		TCGA-E1-A7YI	0	0	19		TCGA-D8-A1JU	0	0	8
TCGA-78-7147	0	0	154		TCGA-D5-5539	0	0	41		TCGA-E1-A7Z2	0	0	19		TCGA-D8-A1XG	0	0	8
TCGA-22-5481	0	0	154		TCGA-D5-7000	0	0	41		TCGA-FG-8185	0	0	19		TCGA-D8-A27K	0	0	8
TCGA-77-8133	0	0	154		TCGA-G4-6323	0	0	41		TCGA-FG-A70Z	0	0	19		TCGA-D8-A27L	0	0	8
TCGA-A5-A0GI	0	0	154		TCGA-LN-A9FO	0	0	41		TCGA-HT-7687	0	0	19		TCGA-D8-A27P	0	0	8
TCGA-E2-A10C	0	0	153		TCGA-R6-A6L6	0	0	41		TCGA-HT-A61C	0	0	19		TCGA-D8-A27T	0	0	8
TCGA-55-1592	0	0	153		TCGA-Z6-A9VB	0	0	41		TCGA-P5-A733	0	0	19		TCGA-E2-A10F	0	0	8
TCGA-L9-A5IP	0	0	153		TCGA-32-5222	0	0	41		TCGA-S9-A7R2	0	0	19		TCGA-E2-A15P	0	0	8
TCGA-96-8170	0	0	153		TCGA-BA-A6D8	0	0	41		TCGA-TQ-A7RW	0	0	19		TCGA-E2-A1BC	0	0	8
TCGA-VQ-A94R	0	0	153		TCGA-CN-5361	0	0	41		TCGA-A2-A3XZ	0	0	19		TCGA-E2-A1L6	0	0	8
TCGA-FD-A6TA	0	0	152		TCGA-CR-6471	0	0	41		TCGA-A8-A08X	0	0	19		TCGA-E2-A570	0	0	8
TCGA-G2-A2ES	0	0	152		TCGA-CV-6003	0	0	41		TCGA-AN-A0AS	0	0	19		TCGA-E9-A1N4	0	0	8
TCGA-K4-A3WS	0	0	152		TCGA-CV-A6JO	0	0	41		TCGA-AN-A0FK	0	0	19		TCGA-E9-A1R3	0	0	8
TCGA-UY-A8OB	0	0	152		TCGA-D6-6826	0	0	41		TCGA-AN-A0XO	0	0	19		TCGA-EW-A1IY	0	0	8
TCGA-V5-AASX	0	0	152		TCGA-D6-A4Z9	0	0	41		TCGA-AO-A03L	0	0	19		TCGA-EW-A1P3	0	0	8
TCGA-22-5491	0	0	152		TCGA-D6-A6EQ	0	0	41		TCGA-AR-A24N	0	0	19		TCGA-JL-A3YX	0	0	8
TCGA-66-2767	0	0	152		TCGA-IQ-A6SG	0	0	41		TCGA-AR-A24S	0	0	19		TCGA-LL-A5YN	0	0	8
TCGA-AP-A0LS	0	0	152		TCGA-B8-A54H	0	0	41		TCGA-B6-A0IG	0	0	19		TCGA-OL-A6VO	0	0	8
TCGA-DK-A1A6	0	0	151		TCGA-BP-4963	1	1	41		TCGA-B6-A0RH	0	0	19		TCGA-W5-AA2Z	0	0	8
TCGA-A2-A0YK	0	0	151		TCGA-CJ-4643	0	0	41		TCGA-B6-A2IU	0	0	19		TCGA-LN-A8I0	0	0	8
TCGA-Z6-AAPN	0	0	151		TCGA-CW-6090	0	0	41		TCGA-BH-A0E7	0	0	19		TCGA-VR-A8ER	0	0	8
TCGA-44-2659	0	0	151		TCGA-CZ-5457	0	0	41		TCGA-BH-A0HI	0	0	19		TCGA-06-A7TL	0	0	8
TCGA-60-2726	0	0	151		TCGA-2Z-A9J2	0	0	41		TCGA-BH-A1EO	0	0	19		TCGA-06-0221	1	1	8
TCGA-66-2769	0	0	151		TCGA-DD-AAEA	0	0	41		TCGA-BH-A1EY	0	0	19		TCGA-06-0221	0	0	8
TCGA-EB-A551	0	0	151		TCGA-DD-AAVY	0	0	41		TCGA-BH-A1F6	0	0	19		TCGA-CV-7100	0	0	8
TCGA-AP-A0LG	0	0	151		TCGA-EP-A2KA	0	0	41		TCGA-BH-A208	0	0	19		TCGA-KL-8337	0	0	8
TCGA-BS-A0UM	0	0	151		TCGA-G3-A5SK	0	0	41		TCGA-C8-A1HL	0	0	19		TCGA-KM-8639	0	0	8
TCGA-E6-A1LZ	1	1	151		TCGA-KR-A7K0	0	0	41		TCGA-D8-A143	0	0	19		TCGA-KN-8431	0	0	8
TCGA-CF-A47X	0	0	150		TCGA-ZP-A9CY	0	0	41		TCGA-E2-A1B0	0	0	19		TCGA-KO-8413	0	0	8
TCGA-DK-A1A5	1	1	150		TCGA-50-5935	0	0	41		TCGA-E2-A1LB	0	0	19		TCGA-KO-8417	0	0	8
TCGA-YF-AA3L	0	0	150		TCGA-86-7714	1	1	41		TCGA-E9-A1R5	0	0	19		TCGA-A3-3374	0	0	8
TCGA-CN-6992	0	0	150		TCGA-63-A5M9	0	0	41		TCGA-E9-A54Y	0	0	19		TCGA-AK-3443	0	0	8
TCGA-05-4250	0	0	150		TCGA-98-A53J	0	0	41		TCGA-LL-A6FP	0	0	19		TCGA-DV-5567	0	0	8
TCGA-66-2789	0	0	150		TCGA-25-1315	0	0	41		TCGA-XX-A899	0	0	19		TCGA-2Z-A9JJ	0	0	8
TCGA-XF-A8HG	0	0	149		TCGA-25-2398	0	0	41		TCGA-C5-A3HF	0	0	19		TCGA-2Z-A9JO	0	0	8
TCGA-XF-A9T3	0	0	149		TCGA-25-2401	0	0	41		TCGA-DS-A7WF	0	0	19		TCGA-BQ-5879	0	0	8
TCGA-AR-A0TX	1	1	149		TCGA-29-1699	0	0	41		TCGA-IR-A3LB	0	0	19		TCGA-BQ-5887	0	0	8
TCGA-CI-6624	0	0	149		TCGA-HZ-A9TJ	0	0	41		TCGA-LP-A4AU	0	0	19		TCGA-O9-A75Z	0	0	8
TCGA-L5-A8NJ	0	0	149		TCGA-N8-A4PO	0	0	41		TCGA-LP-A5U3	0	0	19		TCGA-5R-AA1D	0	0	8
TCGA-50-5066	0	0	149		TCGA-AX-A2H2	0	0	41		TCGA-VS-A9V2	0	0	19		TCGA-DD-A1ED	0	0	8
TCGA-55-8207	0	0	149		TCGA-D1-A15W	0	0	41		TCGA-CM-5862	0	0	19		TCGA-69-7761	0	0	8
TCGA-62-A46P	1	1	149		TCGA-D1-A3DH	0	0	41		TCGA-5M-AAT5	0	0	19		TCGA-75-6203	0	0	8
TCGA-97-7937	0	0	149		TCGA-FI-A2F8	1	1	41		TCGA-GR-A4D6	0	0	19		TCGA-3H-AB3K	0	0	8
TCGA-UD-AAC1	0	0	149		TCGA-2F-A9KQ	0	0	40		TCGA-02-2486	0	0	19		TCGA-MQ-A4KX	0	0	8
TCGA-A5-A0G9	0	0	149		TCGA-BT-A20V	0	0	40		TCGA-06-2562	0	0	19		TCGA-TS-A7P1	0	0	8
TCGA-A5-A0GA	0	0	149		TCGA-G2-A3IB	0	0	40		TCGA-06-5417	0	0	19		TCGA-TS-A8AS	0	0	8
TCGA-OR-A5LJ	0	0	148		TCGA-ZF-A9RM	0	0	40		TCGA-12-5299	0	0	19		TCGA-3A-A9IS	0	0	8
TCGA-E5-A4TZ	0	0	148		TCGA-A8-A097	0	0	40		TCGA-19-2625	0	0	19		TCGA-H8-A6C1	0	0	8
TCGA-AN-A0XW	0	0	148		TCGA-AN-A0AJ	0	0	40		TCGA-27-1835	0	0	19		TCGA-IB-8126	0	0	8
TCGA-55-8208	0	0	148		TCGA-AN-A0FV	0	0	40		TCGA-76-4927	0	0	19		TCGA-XD-AAUG	0	0	8
TCGA-55-A491	0	0	148		TCGA-AO-A0J6	0	0	40		TCGA-06-0238	0	0	19		TCGA-QR-A708	0	0	8
TCGA-66-2793	0	0	148		TCGA-BH-A0C0	0	0	40		TCGA-12-0616	0	0	19		TCGA-RW-A686	0	0	8
TCGA-B5-A0K2	0	0	148		TCGA-D8-A1JN	0	0	40		TCGA-06-0152	0	0	19		TCGA-S7-A7WT	0	0	8
TCGA-VS-A953	1	1	147		TCGA-DS-A7WH	0	0	40		TCGA-BA-5557	0	0	19		TCGA-S7-A7X2	0	0	8
TCGA-CN-6021	0	0	147		TCGA-XS-A8TJ	0	0	40		TCGA-CN-A6V7	0	0	19		TCGA-SQ-A6I6	0	0	8
TCGA-D6-A74Q	0	0	147		TCGA-AG-A016	0	0	40		TCGA-CQ-6227	0	0	19		TCGA-WB-A815	0	0	8
TCGA-44-7660	0	0	147		TCGA-AA-3685	0	0	40		TCGA-CR-6488	0	0	19		TCGA-WB-A81Q	1	1	8
TCGA-21-5782	0	0	147		TCGA-AA-3952	0	0	40		TCGA-CV-7410	0	0	19		TCGA-WB-A81W	0	0	8
TCGA-56-7822	0	0	147		TCGA-AZ-4616	0	0	40		TCGA-HD-7753	0	0	19		TCGA-2A-AAYU	0	0	8
TCGA-XF-AAMX	0	0	146		TCGA-AZ-6600	0	0	40		TCGA-KL-8335	0	0	19		TCGA-EJ-5532	0	0	8
TCGA-IR-A3LI	0	0	146		TCGA-CM-6675	0	0	40		TCGA-A3-3362	0	0	19		TCGA-EJ-7791	0	0	8
TCGA-CV-A6K1	0	0	146		TCGA-CM-6676	0	0	40		TCGA-A3-3370	0	0	19		TCGA-EJ-A65G	0	0	8
TCGA-66-2766	0	0	146		TCGA-L7-A56G	0	0	40		TCGA-B0-5077	0	0	19		TCGA-G9-6333	0	0	8
TCGA-3B-A9HT	0	0	146		TCGA-R6-A6DN	0	0	40		TCGA-B0-5097	0	0	19		TCGA-G9-6365	0	0	8
TCGA-4Z-AA84	1	1	145		TCGA-VR-A8Q7	0	0	40		TCGA-B0-5699	1	1	19		TCGA-HC-7212	0	0	8
TCGA-DK-A2I6	1	1	145		TCGA-CN-6018	0	0	40		TCGA-B0-5812	0	0	19		TCGA-J4-8200	0	0	8
TCGA-UY-A9PD	0	0	145		TCGA-CQ-A4CB	0	0	40		TCGA-B2-5635	0	0	19		TCGA-J4-A67Q	0	0	8
TCGA-L5-A4OE	0	0	145		TCGA-CR-7373	0	0	40		TCGA-B8-4151	0	0	19		TCGA-J4-A67R	0	0	8
TCGA-69-8255	0	0	145		TCGA-CV-6945	0	0	40		TCGA-B8-4621	0	0	19		TCGA-J4-A83N	0	0	8
TCGA-43-7656	0	0	145		TCGA-CV-7411	0	0	40		TCGA-B8-A8YJ	1	1	19		TCGA-KK-A6E5	0	0	8
TCGA-85-8287	0	0	145		TCGA-F7-A50I	0	0	40		TCGA-BP-4162	0	0	19		TCGA-KK-A7AP	0	0	8
TCGA-ER-A19K	0	0	145		TCGA-T2-A6X0	0	0	40		TCGA-BP-4164	0	0	19		TCGA-QU-A6IO	0	0	8
TCGA-AP-A0LF	0	0	145		TCGA-B0-4827	0	0	40		TCGA-BP-4977	0	0	19		TCGA-V1-A9Z9	1	1	8
TCGA-B5-A11G	0	0	145		TCGA-B0-5094	0	0	40		TCGA-BP-5004	0	0	19		TCGA-XJ-A83G	0	0	8
TCGA-B5-A11J	0	0	145		TCGA-CJ-4869	0	0	40		TCGA-BP-5191	1	1	19		TCGA-YL-A8SB	0	0	8
TCGA-C5-A1MH	0	0	144		TCGA-CJ-4920	1	1	40		TCGA-CJ-4637	0	0	19		TCGA-ZG-A9LU	0	0	8
TCGA-CV-A468	0	0	144		TCGA-CJ-6033	0	0	40		TCGA-CJ-4641	0	0	19		TCGA-3B-A9HR	0	0	8
TCGA-44-6145	0	0	144		TCGA-DW-7840	0	0	40		TCGA-CJ-4899	0	0	19		TCGA-DX-A240	0	0	8
TCGA-67-4679	0	0	144		TCGA-EV-5903	0	0	40		TCGA-CJ-4923	1	1	19		TCGA-DX-A6B9	0	0	8
TCGA-78-7159	0	0	144		TCGA-GL-A9DE	1	1	40		TCGA-CZ-4863	0	0	19		TCGA-DX-A8BK	0	0	8
TCGA-86-8056	0	0	144		TCGA-IZ-8196	0	0	40		TCGA-CZ-5988	0	0	19		TCGA-DX-AB2J	0	0	8
TCGA-63-5131	0	0	144		TCGA-DD-A39Z	0	0	40		TCGA-EU-5904	1	1	19		TCGA-DX-AB2P	0	0	8
TCGA-66-2782	0	0	144		TCGA-DD-A3A7	0	0	40		TCGA-2Z-A9JP	0	0	19		TCGA-FX-A48G	1	1	8
TCGA-77-7465	0	0	144		TCGA-DD-AAEH	0	0	40		TCGA-4A-A93Y	0	0	19		TCGA-IE-A4EH	0	0	8
TCGA-90-A4EE	0	0	144		TCGA-G3-AAV3	0	0	40		TCGA-5P-A9JV	0	0	19		TCGA-RD-A8N5	0	0	8
TCGA-98-A53A	0	0	144		TCGA-UB-A7ME	0	0	40		TCGA-A4-7287	0	0	19		TCGA-2G-AAFV	0	0	8
TCGA-BK-A0C9	1	1	144		TCGA-97-A4M5	0	0	40		TCGA-A4-7732	0	0	19		TCGA-2G-AAG0	0	0	8
TCGA-BS-A0VI	0	0	144		TCGA-MP-A4TD	0	0	40		TCGA-A4-8311	0	0	19		TCGA-2G-AAG7	0	0	8
TCGA-52-7622	0	0	143		TCGA-22-1011	0	0	40		TCGA-BQ-5889	0	0	19		TCGA-2G-AAGA	0	0	8
TCGA-85-A50Z	0	0	143		TCGA-22-5474	0	0	40		TCGA-BQ-7053	0	0	19		TCGA-2G-AAGM	0	0	8
TCGA-BG-A0MQ	0	0	143		TCGA-37-A5EL	0	0	40		TCGA-P4-AAVM	0	0	19		TCGA-2G-AAH4	0	0	8
TCGA-AG-A00Y	0	0	142		TCGA-66-2765	0	0	40		TCGA-UZ-A9PU	0	0	19		TCGA-2G-AAHL	0	0	8
TCGA-56-6545	0	0	142		TCGA-O2-A52W	0	0	40		TCGA-CC-A8HU	0	0	19		TCGA-4K-AA1G	0	0	8
TCGA-58-8393	0	0	142		TCGA-ZN-A9VW	1	1	40		TCGA-DD-A4NH	0	0	19		TCGA-S6-A8JY	0	0	8
TCGA-68-7757	0	0	142		TCGA-25-2391	0	0	40		TCGA-DD-A4NQ	0	0	19		TCGA-SN-A84X	0	0	8
TCGA-85-7950	0	0	142		TCGA-US-A77E	0	0	40		TCGA-G3-A3CH	0	0	19		TCGA-SO-A8JP	0	0	8
TCGA-85-8071	0	0	142		TCGA-DX-A8BM	0	0	40		TCGA-05-4434	0	0	19		TCGA-XE-A8H5	0	0	8
TCGA-85-8352	0	0	142		TCGA-VT-A80G	0	0	40		TCGA-49-4510	0	0	19		TCGA-XE-AANR	0	0	8
TCGA-OR-A5J5	0	0	141		TCGA-IN-A6RN	0	0	40		TCGA-49-4512	0	0	19		TCGA-YU-A94D	0	0	8
TCGA-CN-5356	0	0	141		TCGA-ET-A2MY	0	0	40		TCGA-55-8505	0	0	19		TCGA-3G-AB19	0	0	8
TCGA-64-1679	0	0	141		TCGA-AJ-A5DV	0	0	40		TCGA-63-A5MN	0	0	19		TCGA-4V-A9QJ	0	0	8
TCGA-34-7107	0	0	141		TCGA-B5-A1N2	0	0	40		TCGA-3H-AB3T	0	0	19		TCGA-4V-A9QW	0	0	8
TCGA-51-4079	0	0	141		TCGA-CF-A8HY	0	0	39		TCGA-SC-A6LM	1	1	19		TCGA-4X-A9FD	0	0	8
TCGA-B5-A0K6	0	0	141		TCGA-FD-A5BZ	0	0	39		TCGA-SC-A6LR	0	0	19		TCGA-5U-AB0E	0	0	8
TCGA-XF-A9SJ	0	0	140		TCGA-XF-A9SX	0	0	39		TCGA-09-1673	0	0	19		TCGA-XM-AAZ2	0	0	8
TCGA-CR-7398	0	0	140		TCGA-A2-A0YM	0	0	39		TCGA-13-1489	0	0	19		TCGA-XU-A92O	0	0	8
TCGA-T3-A92M	0	0	140		TCGA-A8-A079	0	0	39		TCGA-29-1778	0	0	19		TCGA-XU-A92W	0	0	8
TCGA-44-2657	0	0	140		TCGA-AN-A0FS	0	0	39		TCGA-61-1728	0	0	19		TCGA-XU-A92Z	0	0	8
TCGA-78-8660	0	0	140		TCGA-AR-A1AI	0	0	39		TCGA-2J-AABF	0	0	19		TCGA-XU-AAY0	0	0	8
TCGA-MP-A4TA	0	0	140		TCGA-B6-A0I8	0	0	39		TCGA-3A-A9IV	0	0	19		TCGA-YT-A95E	0	0	8
TCGA-56-7730	0	0	140		TCGA-BH-A18T	0	0	39		TCGA-F2-A7TX	0	0	19		TCGA-YT-A95G	0	0	8
TCGA-63-5128	0	0	140		TCGA-C5-A1MJ	0	0	39		TCGA-FB-A545	0	0	19		TCGA-BJ-A0Z2	0	0	8
TCGA-66-2787	0	0	140		TCGA-VS-A8EB	0	0	39		TCGA-FB-AAPY	0	0	19		TCGA-BJ-A0ZE	0	0	8
TCGA-BG-A18B	0	0	140		TCGA-VS-A94X	0	0	39		TCGA-FB-AAQ0	0	0	19		TCGA-CE-A484	0	0	8
TCGA-GD-A2C5	0	0	139		TCGA-AA-3667	0	0	39		TCGA-H6-8124	0	0	19		TCGA-DE-A0XZ	0	0	8
TCGA-GV-A3JX	0	0	139		TCGA-AA-3692	0	0	39		TCGA-HV-AA8V	0	0	19		TCGA-DE-A4MC	0	0	8
TCGA-MA-AA41	0	0	139		TCGA-AA-3841	0	0	39		TCGA-HZ-7926	0	0	19		TCGA-DE-A69K	0	0	8
TCGA-CN-4723	0	0	139		TCGA-AA-3976	0	0	39		TCGA-HZ-A4BK	0	0	19		TCGA-DJ-A1QE	0	0	8
TCGA-CV-7254	0	0	139		TCGA-AA-A02H	0	0	39		TCGA-IB-7649	0	0	19		TCGA-DJ-A2PZ	0	0	8
TCGA-91-6831	0	0	139		TCGA-CM-6169	0	0	39		TCGA-IB-7893	0	0	19		TCGA-DJ-A3VI	0	0	8
TCGA-NC-A5HQ	0	0	139		TCGA-DM-A28K	0	0	39		TCGA-XN-A8T3	0	0	19		TCGA-E8-A432	0	0	8
TCGA-N9-A4Q7	0	0	139		TCGA-F4-6704	0	0	39		TCGA-QR-A700	0	0	19		TCGA-EL-A3CS	0	0	8
TCGA-2F-A9KT	0	0	138		TCGA-06-2558	0	0	39		TCGA-CH-5788	0	0	19		TCGA-EL-A3CU	0	0	8
TCGA-GU-AATO	0	0	138		TCGA-BA-7269	1	1	39		TCGA-EJ-A65B	0	0	19		TCGA-EL-A3MY	0	0	8
TCGA-A1-A0SO	0	0	138		TCGA-CN-4731	0	0	39		TCGA-EJ-A65M	0	0	19		TCGA-EL-A3T9	0	0	8
TCGA-A8-A08R	0	0	138		TCGA-CN-6994	0	0	39		TCGA-EJ-A7NM	0	0	19		TCGA-EL-A3ZT	0	0	8
TCGA-F7-7848	0	0	138		TCGA-CQ-A4C9	0	0	39		TCGA-HI-7171	0	0	19		TCGA-EL-A4K6	0	0	8
TCGA-KU-A66S	0	0	138		TCGA-CV-5977	0	0	39		TCGA-J9-A52E	0	0	19		TCGA-EM-A2OZ	0	0	8
TCGA-97-A4M0	0	0	138		TCGA-CV-7413	0	0	39		TCGA-KK-A6E4	0	0	19		TCGA-EM-A3AL	0	0	8
TCGA-33-4533	0	0	138		TCGA-CV-7415	0	0	39		TCGA-KK-A8IB	0	0	19		TCGA-EM-A3FM	0	0	8
TCGA-60-2724	0	0	138		TCGA-CV-A45V	0	0	39		TCGA-V1-A9OQ	1	1	19		TCGA-EM-A3OA	0	0	8
TCGA-S5-AA26	0	0	137		TCGA-A3-3331	0	0	39		TCGA-VN-A88P	1	1	19		TCGA-EM-A4FO	0	0	8
TCGA-CC-A7IK	0	0	137		TCGA-AK-3451	0	0	39		TCGA-VP-A875	0	0	19		TCGA-ET-A3DP	0	0	8
TCGA-05-4396	0	0	137		TCGA-B0-5075	0	0	39		TCGA-VP-A87D	0	0	19		TCGA-ET-A3DU	0	0	8
TCGA-44-7661	0	0	137		TCGA-BP-5187	0	0	39		TCGA-X4-A8KQ	0	0	19		TCGA-AX-A05U	0	0	8
TCGA-66-2754	0	0	137		TCGA-CJ-5672	0	0	39		TCGA-YL-A8HJ	0	0	19		TCGA-EY-A1GP	0	0	8
TCGA-EK-A2PM	0	0	136		TCGA-5P-A9K2	0	0	39		TCGA-ZG-A9L6	0	0	19		TCGA-WC-A888	0	0	8
TCGA-05-4417	0	0	136		TCGA-B9-5156	0	0	39		TCGA-ZG-A9LN	0	0	19		TCGA-VD-A8KD	0	0	8
TCGA-50-6593	0	0	136		TCGA-DZ-6132	0	0	39		TCGA-DX-A23Y	0	0	19		TCGA-VD-A8KG	0	0	8
TCGA-62-8399	0	0	136		TCGA-P4-A5E7	0	0	39		TCGA-DX-A7EF	0	0	19		TCGA-OR-A5JZ	0	0	7
TCGA-BG-A0VZ	0	0	136		TCGA-SX-A7SM	1	1	39		TCGA-DX-A8BU	0	0	19		TCGA-PA-A5YG	0	0	7
TCGA-AG-3592	0	0	135		TCGA-2Y-A9GZ	0	0	39		TCGA-DX-AB2F	0	0	19		TCGA-CF-A47S	0	0	7
TCGA-CN-A497	0	0	135		TCGA-DD-AADR	0	0	39		TCGA-HB-A3YV	0	0	19		TCGA-DB-5273	0	0	7
TCGA-56-A4ZK	0	0	135		TCGA-DD-AAEE	0	0	39		TCGA-LI-A67I	0	0	19		TCGA-DB-5276	0	0	7
TCGA-66-2744	0	0	135		TCGA-ED-A66Y	0	0	39		TCGA-X9-A973	0	0	19		TCGA-DH-A66F	0	0	7
TCGA-23-1022	0	0	135		TCGA-EP-A3RK	0	0	39		TCGA-VQ-A91W	0	0	19		TCGA-DU-6404	0	0	7
TCGA-B5-A0JU	0	0	135		TCGA-G3-AAV7	0	0	39		TCGA-ZA-A8F6	0	0	19		TCGA-DU-A76O	0	0	7
TCGA-C5-A1MK	0	0	134		TCGA-QA-A7B7	0	0	39		TCGA-XU-A92V	0	0	19		TCGA-FG-6689	0	0	7
TCGA-CV-7248	0	0	134		TCGA-ZP-A9D4	0	0	39		TCGA-DJ-A13L	0	0	19		TCGA-FG-8188	0	0	7
TCGA-49-4488	0	0	134		TCGA-05-4403	0	0	39		TCGA-E8-A418	0	0	19		TCGA-HT-7482	0	0	7
TCGA-18-3414	0	0	134		TCGA-55-8096	0	0	39		TCGA-N7-A59B	0	0	19		TCGA-HT-7602	0	0	7
TCGA-46-3768	1	1	134		TCGA-55-8097	0	0	39		TCGA-N9-A4PZ	1	1	19		TCGA-HT-7605	0	0	7
TCGA-GN-A4U5	0	0	134		TCGA-86-8278	1	1	39		TCGA-A5-A1OG	0	0	19		TCGA-HT-7879	0	0	7
TCGA-A5-A0GW	0	0	134		TCGA-MP-A4TJ	0	0	39		TCGA-AJ-A6NU	0	0	19		TCGA-HW-8320	0	0	7
TCGA-D1-A0ZS	1	1	134		TCGA-20-1683	0	0	39		TCGA-AX-A06L	0	0	19		TCGA-P5-A5EX	0	0	7
TCGA-BT-A20N	0	0	133		TCGA-A5-A0RA	0	0	39		TCGA-AX-A3G6	0	0	19		TCGA-P5-A730	0	0	7
TCGA-KQ-A41N	0	0	133		TCGA-A5-A7WK	1	1	39		TCGA-B5-A0K3	0	0	19		TCGA-QH-A6CY	0	0	7
TCGA-LT-A5Z6	0	0	133		TCGA-AJ-A23M	0	0	39		TCGA-D1-A16V	0	0	19		TCGA-QH-A86X	0	0	7
TCGA-38-4626	0	0	133		TCGA-AP-A05H	0	0	39		TCGA-D1-A3JQ	0	0	19		TCGA-RY-A847	0	0	7
TCGA-78-7158	0	0	133		TCGA-B5-A5OE	0	0	39		TCGA-FI-A2CY	0	0	19		TCGA-S9-A6TU	0	0	7
TCGA-56-7223	1	1	133		TCGA-EY-A4KR	0	0	39		TCGA-FI-A2EU	0	0	19		TCGA-S9-A6U9	0	0	7
TCGA-85-7697	0	0	133		TCGA-OR-A5JP	0	0	38		TCGA-FI-A2F9	0	0	19		TCGA-TM-A84L	0	0	7
TCGA-D1-A17B	0	0	133		TCGA-G2-A2EK	0	0	38		TCGA-OR-A5JD	0	0	18		TCGA-TQ-A7RI	0	0	7
TCGA-BH-A0HA	0	0	132		TCGA-XF-A9T2	0	0	38		TCGA-OR-A5JG	0	0	18		TCGA-A1-A0SD	0	0	7
TCGA-VS-A9UJ	0	0	132		TCGA-A2-A0YJ	0	0	38		TCGA-OR-A5JM	0	0	18		TCGA-A2-A0ST	0	0	7
TCGA-BA-A6DA	0	0	132		TCGA-A7-A26H	0	0	38		TCGA-OR-A5KY	0	0	18		TCGA-A2-A0T5	0	0	7
TCGA-CV-7414	0	0	132		TCGA-BH-A5IZ	0	0	38		TCGA-OU-A5PI	0	0	18		TCGA-A2-A3XU	0	0	7
TCGA-NC-A5HK	0	0	132		TCGA-C8-A132	0	0	38		TCGA-DH-5142	0	0	18		TCGA-A8-A07F	0	0	7
TCGA-EB-A44P	0	0	132		TCGA-D8-A13Y	0	0	38		TCGA-DH-A7US	0	0	18		TCGA-A8-A08Z	0	0	7
TCGA-XF-AAN5	0	0	131		TCGA-E2-A15M	0	0	38		TCGA-DU-A5TU	0	0	18		TCGA-AC-A2BM	0	0	7
TCGA-64-5779	0	0	131		TCGA-LL-A7SZ	0	0	38		TCGA-DU-A5TW	0	0	18		TCGA-AC-A2FB	0	0	7
TCGA-97-8172	0	0	131		TCGA-EA-A5FO	0	0	38		TCGA-DU-A76R	0	0	18		TCGA-AC-A6IV	0	0	7
TCGA-66-2791	0	0	131		TCGA-JW-A5VH	0	0	38		TCGA-E1-5318	0	0	18		TCGA-AR-A1AU	0	0	7
TCGA-EB-A3XD	0	0	131		TCGA-W5-AA2U	0	0	38		TCGA-HT-7475	0	0	18		TCGA-AR-A24M	0	0	7
TCGA-BT-A20R	1	1	130		TCGA-AF-2693	0	0	38		TCGA-HT-7477	0	0	18		TCGA-AR-A252	0	0	7
TCGA-K4-A83P	0	0	130		TCGA-AG-A01J	0	0	38		TCGA-HT-8105	0	0	18		TCGA-AR-A2LM	0	0	7
TCGA-BH-A0HP	0	0	130		TCGA-A6-5660	0	0	38		TCGA-HT-8106	0	0	18		TCGA-B6-A0RI	0	0	7
TCGA-UF-A7J9	0	0	130		TCGA-AZ-4682	0	0	38		TCGA-HT-A74H	1	1	18		TCGA-B6-A0WV	0	0	7
TCGA-22-5489	0	0	130		TCGA-DM-A1D6	0	0	38		TCGA-KT-A7W1	0	0	18		TCGA-B6-A0X4	0	0	7
TCGA-34-5239	0	0	130		TCGA-F4-6806	0	0	38		TCGA-S9-A7IX	0	0	18		TCGA-BH-A0AU	0	0	7
TCGA-EB-A6QZ	0	0	130		TCGA-G4-6317	0	0	38		TCGA-S9-A7QY	0	0	18		TCGA-BH-A0BQ	0	0	7
TCGA-E7-A4IJ	0	0	129		TCGA-2H-A9GN	0	0	38		TCGA-S9-A7R3	0	0	18		TCGA-BH-A0E1	0	0	7
TCGA-UY-A78P	0	0	129		TCGA-LN-A4A3	0	0	38		TCGA-TQ-A7RN	0	0	18		TCGA-C8-A27A	0	0	7
TCGA-CN-6011	0	0	129		TCGA-LN-A8I1	0	0	38		TCGA-A7-A4SD	0	0	18		TCGA-E2-A107	0	0	7
TCGA-CR-7371	0	0	129		TCGA-R6-A6Y2	0	0	38		TCGA-A7-A5ZX	0	0	18		TCGA-E2-A153	0	0	7
TCGA-DX-AB32	0	0	129		TCGA-X8-AAAR	0	0	38		TCGA-A8-A07P	0	0	18		TCGA-E2-A1IK	1	1	7
TCGA-86-8674	0	0	128		TCGA-CN-4728	0	0	38		TCGA-A8-A083	0	0	18		TCGA-E2-A1LK	0	0	7
TCGA-L9-A443	0	0	128		TCGA-CN-5370	0	0	38		TCGA-A8-A09C	0	0	18		TCGA-E9-A1RI	0	0	7
TCGA-FD-A3SO	0	0	127		TCGA-CN-6989	0	0	38		TCGA-AC-A3QQ	0	0	18		TCGA-E9-A24A	0	0	7
TCGA-K4-A6MB	1	1	127		TCGA-CV-7438	1	1	38		TCGA-AN-A03X	0	0	18		TCGA-EW-A1OX	0	0	7
TCGA-AR-A2LE	0	0	127		TCGA-B0-5095	0	0	38		TCGA-AN-A0G0	0	0	18		TCGA-EW-A2FW	0	0	7
TCGA-AD-6901	0	0	127		TCGA-CW-6087	0	0	38		TCGA-AO-A03R	0	0	18		TCGA-EW-A6S9	0	0	7
TCGA-CV-7242	0	0	127		TCGA-5P-A9K0	0	0	38		TCGA-AO-A12E	0	0	18		TCGA-EW-A6SC	0	0	7
TCGA-44-7671	0	0	127		TCGA-DW-7838	0	0	38		TCGA-AR-A0TP	0	0	18		TCGA-WT-AB44	0	0	7
TCGA-55-8301	1	1	127		TCGA-CC-A7IL	0	0	38		TCGA-B6-A0X1	0	0	18		TCGA-C5-A0TN	0	0	7
TCGA-18-3411	0	0	127		TCGA-DD-A1EJ	0	0	38		TCGA-BH-A6R8	0	0	18		TCGA-EA-A3HR	0	0	7
TCGA-66-2771	0	0	127		TCGA-DD-A39V	0	0	38		TCGA-D8-A1XY	0	0	18		TCGA-Q1-A6DV	0	0	7
TCGA-85-6798	0	0	127		TCGA-DD-A73C	1	1	38		TCGA-D8-A4Z1	0	0	18		TCGA-VS-A9UT	0	0	7
TCGA-O2-A52V	0	0	127		TCGA-DD-AADD	0	0	38		TCGA-E2-A1AZ	0	0	18		TCGA-AH-6547	0	0	7
TCGA-OR-A5K4	0	0	126		TCGA-ZP-A9CV	0	0	38		TCGA-LL-A5YO	0	0	18		TCGA-LN-A5U5	0	0	7
TCGA-FD-A3N5	0	0	126		TCGA-73-4676	1	1	38		TCGA-LL-A6FR	0	0	18		TCGA-28-5218	1	1	7
TCGA-L5-A4OW	0	0	126		TCGA-J2-A4AG	0	0	38		TCGA-OL-A5D6	0	0	18		TCGA-08-0386	0	0	7
TCGA-CR-6472	0	0	126		TCGA-S2-AA1A	0	0	38		TCGA-OL-A6VQ	0	0	18		TCGA-28-2510	0	0	7
TCGA-ED-A459	0	0	126		TCGA-13-1512	0	0	38		TCGA-S3-AA15	0	0	18		TCGA-CV-A45T	0	0	7
TCGA-50-6592	0	0	126		TCGA-20-1682	0	0	38		TCGA-C5-A1MI	0	0	18		TCGA-KL-8333	0	0	7
TCGA-55-8614	0	0	126		TCGA-24-1436	0	0	38		TCGA-C5-A7CG	0	0	18		TCGA-KM-8440	0	0	7
TCGA-39-5036	0	0	126		TCGA-24-1470	0	0	38		TCGA-EA-A5ZE	0	0	18		TCGA-KN-8425	0	0	7
TCGA-68-8251	0	0	126		TCGA-X6-A8C2	0	0	38		TCGA-EX-A3L1	0	0	18		TCGA-KN-8429	0	0	7
TCGA-VQ-A91S	0	0	126		TCGA-B5-A11W	0	0	38		TCGA-EX-A8YF	0	0	18		TCGA-KO-8414	0	0	7
TCGA-GU-A42P	0	0	125		TCGA-D1-A0ZQ	0	0	38		TCGA-FU-A770	0	0	18		TCGA-B0-4700	0	0	7
TCGA-CV-6936	0	0	125		TCGA-BT-A20U	0	0	37		TCGA-JX-A3PZ	0	0	18		TCGA-BP-4975	0	0	7
TCGA-78-7156	0	0	125		TCGA-DK-A2HX	0	0	37		TCGA-LP-A4AX	0	0	18		TCGA-2Z-A9J8	0	0	7
TCGA-34-5929	0	0	125		TCGA-YF-AA3M	0	0	37		TCGA-W5-AA31	0	0	18		TCGA-DZ-6135	0	0	7
TCGA-39-5030	0	0	125		TCGA-ZF-AA54	0	0	37		TCGA-EI-6509	0	0	18		TCGA-F9-A7Q0	0	0	7
TCGA-D1-A17A	0	0	125		TCGA-A7-A6VW	0	0	37		TCGA-A6-5664	0	0	18		TCGA-MH-A560	0	0	7
TCGA-D1-A1NS	0	0	125		TCGA-A7-A6VY	0	0	37		TCGA-QG-A5YX	0	0	18		TCGA-MH-A857	0	0	7
TCGA-A2-A0CX	0	0	124		TCGA-A8-A09N	0	0	37		TCGA-06-2570	0	0	18		TCGA-DD-A1EC	0	0	7
TCGA-DD-AACL	0	0	124		TCGA-C8-A26X	0	0	37		TCGA-06-5418	0	0	18		TCGA-XR-A8TE	0	0	7
TCGA-J2-A4AD	0	0	124		TCGA-D8-A1XW	0	0	37		TCGA-4W-AA9S	0	0	18		TCGA-44-6146	0	0	7
TCGA-66-2758	0	0	124		TCGA-EW-A6SA	0	0	37		TCGA-06-0130	0	0	18		TCGA-55-6980	0	0	7
TCGA-C8-A8HQ	0	0	123		TCGA-EK-A2RO	0	0	37		TCGA-06-0749	0	0	18		TCGA-78-8648	0	0	7
TCGA-05-4395	0	0	123		TCGA-AG-3732	0	0	37		TCGA-BA-5559	0	0	18		TCGA-60-2706	0	0	7
TCGA-55-7574	0	0	123		TCGA-DC-5869	0	0	37		TCGA-BA-6873	0	0	18		TCGA-UT-A88D	0	0	7
TCGA-22-4604	0	0	123		TCGA-DC-6157	0	0	37		TCGA-BB-4217	0	0	18		TCGA-YS-A95B	0	0	7
TCGA-43-6143	0	0	123		TCGA-F5-6811	0	0	37		TCGA-CN-A6UY	0	0	18		TCGA-24-2038	0	0	7
TCGA-85-8070	0	0	123		TCGA-A6-6651	0	0	37		TCGA-CQ-5323	0	0	18		TCGA-10-0927	0	0	7
TCGA-EB-A41B	0	0	123		TCGA-AA-3688	0	0	37		TCGA-CQ-5329	0	0	18		TCGA-24-0970	0	0	7
TCGA-DK-AA77	0	0	122		TCGA-AA-A01C	0	0	37		TCGA-CQ-7065	0	0	18		TCGA-13-0911	0	0	7
TCGA-GC-A3RC	0	0	122		TCGA-AZ-5407	0	0	37		TCGA-CR-6470	0	0	18		TCGA-13-0891	1	1	7
TCGA-C8-A1HM	0	0	122		TCGA-CM-5349	0	0	37		TCGA-CR-7397	0	0	18		TCGA-2J-AABE	0	0	7
TCGA-CN-A63T	0	0	122		TCGA-D5-6532	0	0	37		TCGA-CV-5973	0	0	18		TCGA-IB-7887	0	0	7
TCGA-CN-A6V1	0	0	122		TCGA-M9-A5M8	0	0	37		TCGA-CV-7236	0	0	18		TCGA-IB-8127	0	0	7
TCGA-DD-AAE7	0	0	122		TCGA-14-0817	0	0	37		TCGA-HD-A634	0	0	18		TCGA-Q3-AA2A	0	0	7
TCGA-86-7701	0	0	122		TCGA-06-0645	0	0	37		TCGA-KL-8341	1	1	18		TCGA-P8-A5KC	0	0	7
TCGA-97-7546	0	0	122		TCGA-BA-A6DE	0	0	37		TCGA-KN-8432	0	0	18		TCGA-QR-A70K	0	0	7
TCGA-43-3920	0	0	122		TCGA-CR-6480	1	1	37		TCGA-KO-8404	0	0	18		TCGA-QR-A70N	0	0	7
TCGA-77-8154	0	0	122		TCGA-CR-7401	0	0	37		TCGA-A3-3316	0	0	18		TCGA-QT-A5XK	0	0	7
TCGA-NC-A5HO	0	0	122		TCGA-CV-7243	0	0	37		TCGA-AS-3778	0	0	18		TCGA-RW-A681	0	0	7
TCGA-D7-A6EZ	0	0	122		TCGA-D6-A6EO	0	0	37		TCGA-B0-5108	0	0	18		TCGA-RX-A8JQ	0	0	7
TCGA-BS-A0UA	0	0	122		TCGA-DQ-7592	0	0	37		TCGA-B0-5707	0	0	18		TCGA-W2-A7H7	0	0	7
TCGA-G2-A2EJ	0	0	121		TCGA-HD-7832	0	0	37		TCGA-B2-4101	1	1	18		TCGA-WB-A816	0	0	7
TCGA-ZF-A9R4	0	0	121		TCGA-UF-A718	0	0	37		TCGA-B2-5639	1	1	18		TCGA-WB-A81E	0	0	7
TCGA-AZ-6599	0	0	121		TCGA-A3-A8OU	0	0	37		TCGA-B4-5377	0	0	18		TCGA-WB-A81T	0	0	7
TCGA-19-1389	0	0	121		TCGA-BP-4983	1	1	37		TCGA-B8-5159	0	0	18		TCGA-2A-AAYO	0	0	7
TCGA-CV-6935	0	0	121		TCGA-CW-6093	0	0	37		TCGA-B8-5549	0	0	18		TCGA-CH-5739	0	0	7
TCGA-MI-A75G	0	0	121		TCGA-CZ-5459	1	1	37		TCGA-B8-A54G	0	0	18		TCGA-CH-5763	0	0	7
TCGA-05-5428	0	0	121		TCGA-BQ-7051	0	0	37		TCGA-BP-4801	0	0	18		TCGA-CH-5771	0	0	7
TCGA-49-6744	1	1	121		TCGA-2Y-A9H5	0	0	37		TCGA-BP-4968	0	0	18		TCGA-EJ-5497	0	0	7
TCGA-91-6848	1	1	121		TCGA-BC-A10T	0	0	37		TCGA-BP-5008	0	0	18		TCGA-EJ-5516	0	0	7
TCGA-60-2723	1	1	121		TCGA-BW-A5NP	0	0	37		TCGA-BP-5177	0	0	18		TCGA-EJ-5527	0	0	7
TCGA-77-8148	0	0	121		TCGA-FV-A3R2	0	0	37		TCGA-BP-5186	0	0	18		TCGA-EJ-8470	0	0	7
TCGA-77-A5G8	0	0	121		TCGA-NI-A8LF	0	0	37		TCGA-BP-5190	0	0	18		TCGA-EJ-A46I	0	0	7
TCGA-98-8022	0	0	121		TCGA-WX-AA44	0	0	37		TCGA-BP-5198	1	1	18		TCGA-EJ-AB20	0	0	7
TCGA-EB-A430	0	0	121		TCGA-93-A4JN	0	0	37		TCGA-CJ-4905	0	0	18		TCGA-G9-6351	0	0	7
TCGA-E7-A677	0	0	120		TCGA-22-1000	0	0	37		TCGA-CZ-5455	0	0	18		TCGA-G9-7523	0	0	7
TCGA-BA-A6DJ	0	0	120		TCGA-33-4589	0	0	37		TCGA-CZ-5467	0	0	18		TCGA-HC-8256	0	0	7
TCGA-P3-A6T5	0	0	120		TCGA-24-1428	0	0	37		TCGA-CZ-5985	0	0	18		TCGA-HC-8260	0	0	7
TCGA-05-4430	0	0	120		TCGA-3P-A9WA	0	0	37		TCGA-G7-6793	0	0	18		TCGA-HC-A48F	0	0	7
TCGA-44-6777	0	0	120		TCGA-2L-AAQA	0	0	37		TCGA-G7-7501	0	0	18		TCGA-HC-A6AS	0	0	7
TCGA-75-7027	0	0	120		TCGA-ZG-A9NI	1	1	37		TCGA-G7-A8LD	0	0	18		TCGA-KK-A8I8	0	0	7
TCGA-22-1005	0	0	120		TCGA-DX-A6YQ	0	0	37		TCGA-GL-A4EM	0	0	18		TCGA-VN-A88N	0	0	7
TCGA-43-A475	0	0	120		TCGA-DX-A6YZ	0	0	37		TCGA-HE-7128	0	0	18		TCGA-YL-A8HK	0	0	7
TCGA-55-7727	0	0	119		TCGA-DX-A8BL	0	0	37		TCGA-P4-A5E8	0	0	18		TCGA-YL-A8S9	0	0	7
TCGA-58-A46L	0	0	119		TCGA-D9-A4Z5	0	0	37		TCGA-UZ-A9PM	0	0	18		TCGA-ZG-A9ND	0	0	7
TCGA-92-8065	0	0	119		TCGA-GF-A2C7	0	0	37		TCGA-UZ-A9PZ	0	0	18		TCGA-DX-A3UB	0	0	7
TCGA-61-1740	0	0	119		TCGA-N5-A4RN	0	0	37		TCGA-DD-A115	0	0	18		TCGA-DX-A6BH	0	0	7
TCGA-EY-A1GQ	0	0	119		TCGA-N5-A4RU	0	0	37		TCGA-DD-AAE1	0	0	18		TCGA-DX-AB2S	0	0	7
TCGA-K4-AAQO	0	0	118		TCGA-BS-A0V7	0	0	37		TCGA-DD-AAVW	0	0	18		TCGA-DX-AB3C	0	0	7
TCGA-05-4420	0	0	118		TCGA-D1-A161	0	0	37		TCGA-ED-A7PY	0	0	18		TCGA-FX-A3NJ	0	0	7
TCGA-50-7109	0	0	118		TCGA-DF-A2KR	0	0	37		TCGA-G3-A5SI	0	0	18		TCGA-MO-A47P	0	0	7
TCGA-86-7955	0	0	118		TCGA-FI-A2EY	0	0	37		TCGA-HP-A5MZ	0	0	18		TCGA-WK-A8XZ	0	0	7
TCGA-56-7221	0	0	118		TCGA-BT-A20W	0	0	36		TCGA-PD-A5DF	0	0	18		TCGA-EB-A4IQ	0	0	7
TCGA-63-A5MI	0	0	118		TCGA-FD-A62S	0	0	36		TCGA-UB-A7MC	0	0	18		TCGA-2G-AAHC	0	0	7
TCGA-66-2757	0	0	118		TCGA-GC-A3RD	0	0	36		TCGA-UB-AA0V	0	0	18		TCGA-2G-AAKD	0	0	7
TCGA-25-1326	0	0	118		TCGA-ZF-A9RE	0	0	36		TCGA-05-4433	0	0	18		TCGA-XE-AANJ	0	0	7
TCGA-G2-A2EF	0	0	117		TCGA-FG-A4MW	0	0	36		TCGA-38-4627	0	0	18		TCGA-XE-AAO6	0	0	7
TCGA-A1-A0SI	0	0	117		TCGA-S9-A6WM	0	0	36		TCGA-44-A47B	0	0	18		TCGA-YU-AA61	0	0	7
TCGA-55-8085	0	0	117		TCGA-A2-A0YT	0	0	36		TCGA-49-4501	0	0	18		TCGA-3G-AB0T	0	0	7
TCGA-91-8499	0	0	117		TCGA-A8-A06O	0	0	36		TCGA-86-8671	0	0	18		TCGA-5V-A9RR	0	0	7
TCGA-85-A4JC	0	0	117		TCGA-A8-A08P	0	0	36		TCGA-97-8547	0	0	18		TCGA-X7-A8D9	0	0	7
TCGA-AP-A0LP	0	0	117		TCGA-AN-A0FZ	0	0	36		TCGA-99-AA5R	0	0	18		TCGA-X7-A8DD	0	0	7
TCGA-D1-A2G5	0	0	117		TCGA-BH-A0BW	0	0	36		TCGA-MQ-A4LI	0	0	18		TCGA-XU-A92U	0	0	7
TCGA-DK-AA6W	0	0	116		TCGA-BH-A18Q	0	0	36		TCGA-MQ-A4LV	1	1	18		TCGA-YT-A95H	0	0	7
TCGA-DK-AA76	0	0	116		TCGA-E9-A1NE	0	0	36		TCGA-TS-A7P8	0	0	18		TCGA-ZB-A96F	0	0	7
TCGA-ZF-AA58	0	0	116		TCGA-E9-A5FL	0	0	36		TCGA-UT-A88E	1	1	18		TCGA-ZB-A96H	0	0	7
TCGA-BH-A18P	0	0	116		TCGA-C5-A2M1	0	0	36		TCGA-25-1328	0	0	18		TCGA-ZB-A96Q	0	0	7
TCGA-CV-5432	0	0	116		TCGA-C5-A7X3	0	0	36		TCGA-29-A5NZ	0	0	18		TCGA-ZT-A8OM	0	0	7
TCGA-05-4389	0	0	116		TCGA-VS-A9UU	0	0	36		TCGA-FB-AAPQ	0	0	18		TCGA-BJ-A0Z9	0	0	7
TCGA-55-6987	0	0	116		TCGA-VS-A9V5	1	1	36		TCGA-IB-7645	0	0	18		TCGA-BJ-A2P4	0	0	7
TCGA-69-7973	0	0	116		TCGA-AF-6655	0	0	36		TCGA-IB-7885	0	0	18		TCGA-BJ-A3EZ	0	0	7
TCGA-22-4594	0	0	116		TCGA-AG-A008	0	0	36		TCGA-IB-7890	0	0	18		TCGA-BJ-A4O9	0	0	7
TCGA-51-4080	0	0	116		TCGA-AG-A032	0	0	36		TCGA-IB-AAUU	0	0	18		TCGA-DJ-A1QQ	0	0	7
TCGA-63-A5ML	0	0	116		TCGA-DC-6160	0	0	36		TCGA-CH-5764	0	0	18		TCGA-DJ-A2Q3	0	0	7
TCGA-66-2734	0	0	116		TCGA-DC-6681	0	0	36		TCGA-EJ-5494	0	0	18		TCGA-DJ-A2Q4	0	0	7
TCGA-20-0991	0	0	116		TCGA-F5-6464	0	0	36		TCGA-EJ-5498	1	1	18		TCGA-DJ-A2Q7	0	0	7
TCGA-BB-4227	0	0	115		TCGA-A6-5666	0	0	36		TCGA-EJ-7321	0	0	18		TCGA-DJ-A2QC	0	0	7
TCGA-CQ-5327	0	0	115		TCGA-AA-3867	0	0	36		TCGA-G9-6348	0	0	18		TCGA-DJ-A3UO	0	0	7
TCGA-56-A4BW	0	0	115		TCGA-14-1034	0	0	36		TCGA-G9-6366	0	0	18		TCGA-DJ-A3V0	0	0	7
TCGA-85-8481	0	0	115		TCGA-14-1034	0	0	36		TCGA-G9-6371	0	0	18		TCGA-DJ-A3V4	0	0	7
TCGA-BF-A1PX	0	0	115		TCGA-76-4928	0	0	36		TCGA-G9-7525	0	0	18		TCGA-EL-A3D6	0	0	7
TCGA-FD-A3B6	0	0	114		TCGA-BA-A6DI	0	0	36		TCGA-HC-7213	0	0	18		TCGA-EL-A3GS	0	0	7
TCGA-FF-8042	0	0	114		TCGA-CR-5243	0	0	36		TCGA-J4-AAU2	0	0	18		TCGA-EL-A3GV	0	0	7
TCGA-2H-A9GF	0	0	114		TCGA-CV-6436	0	0	36		TCGA-KK-A6DY	0	0	18		TCGA-EL-A3N3	0	0	7
TCGA-IG-A4P3	0	0	114		TCGA-CV-6934	0	0	36		TCGA-KK-A8IL	0	0	18		TCGA-EL-A3T1	0	0	7
TCGA-78-7148	0	0	114		TCGA-P3-A6T8	0	0	36		TCGA-TP-A8TV	0	0	18		TCGA-EL-A3T2	0	0	7
TCGA-21-1081	0	0	114		TCGA-CJ-4640	0	0	36		TCGA-VP-A87B	0	0	18		TCGA-EL-A3T7	0	0	7
TCGA-34-5927	1	1	114		TCGA-CJ-4912	0	0	36		TCGA-XJ-A83F	0	0	18		TCGA-EL-A3ZR	0	0	7
TCGA-43-8116	0	0	114		TCGA-CJ-6030	0	0	36		TCGA-XK-AAIR	0	0	18		TCGA-EM-A22J	0	0	7
TCGA-51-4081	0	0	114		TCGA-2Z-A9JG	0	0	36		TCGA-YL-A8HO	0	0	18		TCGA-EM-A3AK	0	0	7
TCGA-85-8584	0	0	114		TCGA-B3-4104	0	0	36		TCGA-YL-A8S8	0	0	18		TCGA-EM-A3FP	0	0	7
TCGA-KQ-A41P	0	0	113		TCGA-BQ-7061	1	1	36		TCGA-YL-A8SQ	0	0	18		TCGA-EM-A3ST	0	0	7
TCGA-50-5931	0	0	113		TCGA-2V-A95S	0	0	36		TCGA-3B-A9HP	0	0	18		TCGA-ET-A25I	0	0	7
TCGA-86-8281	0	0	113		TCGA-DD-A1EK	0	0	36		TCGA-3B-A9HY	0	0	18		TCGA-ET-A3BQ	0	0	7
TCGA-66-2742	0	0	113		TCGA-DD-A39X	0	0	36		TCGA-DX-A3LU	0	0	18		TCGA-ET-A3DR	0	0	7
TCGA-EY-A1GF	0	0	113		TCGA-DD-A4NK	0	0	36		TCGA-DX-A3LW	0	0	18		TCGA-FE-A233	0	0	7
TCGA-BT-A20T	0	0	112		TCGA-DD-AAD2	0	0	36		TCGA-DX-AB2G	0	0	18		TCGA-FK-A3SH	0	0	7
TCGA-A8-A09G	0	0	112		TCGA-ED-A7XO	0	0	36		TCGA-K1-A3PN	0	0	18		TCGA-FY-A3W9	0	0	7
TCGA-44-6144	0	0	112		TCGA-ED-A7XP	0	0	36		TCGA-MB-A8JL	0	0	18		TCGA-J8-A4HW	0	0	7
TCGA-55-8514	0	0	112		TCGA-FV-A23B	0	0	36		TCGA-SG-A6Z4	0	0	18		TCGA-L6-A4EP	0	0	7
TCGA-18-3416	0	0	112		TCGA-49-4506	0	0	36		TCGA-VT-A80J	0	0	18		TCGA-MK-A84Z	0	0	7
TCGA-52-7812	0	0	112		TCGA-91-6835	0	0	36		TCGA-VT-AB3D	0	0	18		TCGA-AJ-A3BF	0	0	7
TCGA-56-7579	0	0	112		TCGA-MP-A4T6	0	0	36		TCGA-WK-A8XO	0	0	18		TCGA-AX-A1CC	0	0	7
TCGA-E7-A7DV	0	0	111		TCGA-09-2044	0	0	36		TCGA-X6-A8C5	0	0	18		TCGA-AX-A3G7	0	0	7
TCGA-KQ-A41S	0	0	111		TCGA-13-1507	0	0	36		TCGA-D9-A4Z2	0	0	18		TCGA-D1-A17C	0	0	7
TCGA-L5-A8NI	0	0	111		TCGA-25-2404	0	0	36		TCGA-MX-A5UG	0	0	18		TCGA-D1-A17N	0	0	7
TCGA-CV-A6JM	0	0	111		TCGA-59-2354	0	0	36		TCGA-XY-A8S2	0	0	18		TCGA-QF-A5YT	0	0	7
TCGA-39-5022	0	0	111		TCGA-61-1910	0	0	36		TCGA-ZB-A965	0	0	18		TCGA-V4-A9EU	0	0	7
TCGA-85-A4QR	0	0	111		TCGA-IB-A6UG	0	0	36		TCGA-BJ-A0ZB	0	0	18		TCGA-V4-A9F4	0	0	7
TCGA-NC-A5HF	0	0	111		TCGA-EJ-5525	0	0	36		TCGA-DO-A2HM	0	0	18		TCGA-RZ-AB0B	0	0	7
TCGA-13-0885	0	0	111		TCGA-DX-A6YV	0	0	36		TCGA-IM-A3U2	0	0	18		TCGA-VD-A8KH	0	0	7
TCGA-B5-A11U	1	1	111		TCGA-BF-A1PU	0	0	36		TCGA-NG-A4VU	0	0	18		TCGA-V4-A9EM	1	1	7
TCGA-BS-A0V4	0	0	111		TCGA-MX-A663	0	0	36		TCGA-QN-A5NN	0	0	18		TCGA-V4-A9EA	0	0	7
TCGA-EY-A1GO	0	0	111		TCGA-EL-A3ZO	0	0	36		TCGA-AP-A0LL	0	0	18		TCGA-V4-A9E8	0	0	7
TCGA-FD-A3SN	0	0	110		TCGA-N6-A4VD	0	0	36		TCGA-B5-A0K1	0	0	18		TCGA-WC-A880	0	0	7
TCGA-GC-A6I1	0	0	110		TCGA-AJ-A2QK	0	0	36		TCGA-BG-A0RY	0	0	18		TCGA-WC-A883	0	0	7
TCGA-GD-A6C6	0	0	110		TCGA-OR-A5K2	0	0	35		TCGA-D1-A0ZR	0	0	18		TCGA-OR-A5JJ	0	0	6
TCGA-A8-A09A	0	0	110		TCGA-BT-A20Q	0	0	35		TCGA-D1-A16B	0	0	18		TCGA-PK-A5H9	0	0	6
TCGA-C5-A8XJ	0	0	110		TCGA-DK-A1AA	0	0	35		TCGA-D1-A16I	0	0	18		TCGA-CF-A5U8	0	0	6
TCGA-Q9-A6FW	0	0	110		TCGA-DK-AA6Q	0	0	35		TCGA-D1-A16Q	0	0	18		TCGA-DK-A3WY	0	0	6
TCGA-44-6776	0	0	110		TCGA-XF-A9SV	0	0	35		TCGA-EO-A1Y7	0	0	18		TCGA-CS-5394	0	0	6
TCGA-98-7454	0	0	110		TCGA-TQ-A7RM	0	0	35		TCGA-EY-A1GM	0	0	18		TCGA-DB-5270	0	0	6
TCGA-GC-A3YS	0	0	109		TCGA-A8-A07L	0	0	35		TCGA-CS-5397	0	0	17		TCGA-DB-A4XG	0	0	6
TCGA-ZF-A9RF	0	0	109		TCGA-B6-A0IO	0	0	35		TCGA-CS-6188	0	0	17		TCGA-DB-A64Q	0	0	6
TCGA-CN-4739	0	0	109		TCGA-BH-A0DX	0	0	35		TCGA-CS-6670	0	0	17		TCGA-DH-A7UT	0	0	6
TCGA-CV-7099	0	0	109		TCGA-D8-A1XZ	0	0	35		TCGA-DB-5277	0	0	17		TCGA-DU-5870	0	0	6
TCGA-55-6972	0	0	109		TCGA-E9-A1NA	0	0	35		TCGA-DB-5279	0	0	17		TCGA-FN-7833	0	0	6
TCGA-73-4677	0	0	109		TCGA-GM-A2DI	0	0	35		TCGA-DB-5281	0	0	17		TCGA-HT-7483	0	0	6
TCGA-43-8115	0	0	109		TCGA-C5-A1BJ	0	0	35		TCGA-DH-5144	0	0	17		TCGA-HT-7692	0	0	6
TCGA-77-6844	0	0	109		TCGA-EA-A1QT	0	0	35		TCGA-DH-A66G	0	0	17		TCGA-HT-7877	0	0	6
TCGA-AP-A1DM	0	0	109		TCGA-FU-A3YQ	0	0	35		TCGA-DU-5849	0	0	17		TCGA-HT-8012	0	0	6
TCGA-B5-A0JR	0	0	109		TCGA-GH-A9DA	1	1	35		TCGA-DU-6393	0	0	17		TCGA-P5-A5ET	0	0	6
TCGA-FD-A5BX	0	0	108		TCGA-VS-A9U5	0	0	35		TCGA-DU-7007	0	0	17		TCGA-P5-A72X	0	0	6
TCGA-CV-7252	0	0	108		TCGA-ZJ-A8QO	0	0	35		TCGA-DU-7013	0	0	17		TCGA-QH-A65S	0	0	6
TCGA-46-3765	0	0	108		TCGA-AH-6903	0	0	35		TCGA-DU-7309	0	0	17		TCGA-QH-A6CX	0	0	6
TCGA-77-7335	0	0	108		TCGA-DC-4745	0	0	35		TCGA-DU-A5TR	0	0	17		TCGA-QH-A870	0	0	6
TCGA-77-8128	0	0	108		TCGA-AY-A8YK	0	0	35		TCGA-DU-A76L	0	0	17		TCGA-S9-A7IQ	0	0	6
TCGA-85-8277	0	0	108		TCGA-CA-5797	0	0	35		TCGA-DU-A7TA	1	1	17		TCGA-TM-A7C5	0	0	6
TCGA-29-1761	0	0	108		TCGA-FA-A7Q1	0	0	35		TCGA-E1-A7YD	0	0	17		TCGA-TM-A84R	0	0	6
TCGA-KB-A93H	0	0	108		TCGA-L5-A8NN	0	0	35		TCGA-E1-A7YO	0	0	17		TCGA-WY-A859	0	0	6
TCGA-AX-A064	0	0	108		TCGA-LN-A4A5	0	0	35		TCGA-FG-7636	0	0	17		TCGA-A2-A0YF	0	0	6
TCGA-FD-A3SM	0	0	107		TCGA-LN-A4MQ	0	0	35		TCGA-FG-7641	0	0	17		TCGA-A8-A07Z	0	0	6
TCGA-CN-A641	0	0	107		TCGA-12-5295	0	0	35		TCGA-FG-A710	0	0	17		TCGA-A8-A082	0	0	6
TCGA-P3-A5Q5	0	0	107		TCGA-19-2620	0	0	35		TCGA-HT-7603	0	0	17		TCGA-AO-A0JI	0	0	6
TCGA-43-6771	0	0	107		TCGA-15-0742	0	0	35		TCGA-HT-7609	0	0	17		TCGA-AO-A0JJ	0	0	6
TCGA-66-2795	0	0	107		TCGA-06-0174	0	0	35		TCGA-HT-A61B	0	0	17		TCGA-AO-A126	0	0	6
TCGA-AJ-A3IA	0	0	107		TCGA-P3-A5QA	0	0	35		TCGA-HT-A74K	0	0	17		TCGA-AQ-A1H2	0	0	6
TCGA-EY-A2OM	0	0	107		TCGA-P3-A6T0	0	0	35		TCGA-S9-A6TW	0	0	17		TCGA-AR-A24W	0	0	6
TCGA-CF-A1HR	1	1	106		TCGA-B0-5705	0	0	35		TCGA-TQ-A7RF	0	0	17		TCGA-B6-A0WT	0	0	6
TCGA-QL-A97D	0	0	106		TCGA-B4-5835	1	1	35		TCGA-TQ-A7RH	0	0	17		TCGA-B6-A0X7	0	0	6
TCGA-86-8672	0	0	106		TCGA-B4-5844	0	0	35		TCGA-VM-A8C8	0	0	17		TCGA-BH-A0DV	0	0	6
TCGA-22-4591	0	0	106		TCGA-BP-5195	0	0	35		TCGA-A1-A0SP	0	0	17		TCGA-BH-A0H6	0	0	6
TCGA-85-A53L	0	0	106		TCGA-CJ-5679	0	0	35		TCGA-A2-A0T4	0	0	17		TCGA-BH-A18M	0	0	6
TCGA-BF-A5ER	0	0	106		TCGA-CZ-5453	0	0	35		TCGA-A7-A26I	0	0	17		TCGA-BH-A1EW	0	0	6
TCGA-4Z-AA7Q	0	0	105		TCGA-DV-A4W0	0	0	35		TCGA-A8-A06N	0	0	17		TCGA-D8-A1JS	0	0	6
TCGA-G2-AA3C	0	0	105		TCGA-MM-A84U	0	0	35		TCGA-A8-A09D	0	0	17		TCGA-D8-A1XO	0	0	6
TCGA-A8-A06X	0	0	105		TCGA-2Z-A9J5	0	0	35		TCGA-A8-A0A1	0	0	17		TCGA-D8-A1Y2	0	0	6
TCGA-QG-A5YV	0	0	105		TCGA-A4-A57E	0	0	35		TCGA-A8-A0AB	0	0	17		TCGA-E2-A1IJ	0	0	6
TCGA-CN-A6V3	0	0	105		TCGA-HE-A5NJ	0	0	35		TCGA-AN-A049	0	0	17		TCGA-E2-A1IU	0	0	6
TCGA-CR-7368	0	0	105		TCGA-HE-A5NL	0	0	35		TCGA-AO-A0JM	0	0	17		TCGA-E9-A1RA	0	0	6
TCGA-44-2668	0	0	105		TCGA-SX-A7SQ	0	0	35		TCGA-AO-A12F	0	0	17		TCGA-E9-A227	0	0	6
TCGA-MP-A4TF	0	0	105		TCGA-2Y-A9GT	0	0	35		TCGA-AO-A12G	0	0	17		TCGA-E9-A249	0	0	6
TCGA-46-6026	1	1	105		TCGA-2Y-A9GV	0	0	35		TCGA-AR-A0U2	0	0	17		TCGA-E9-A5UO	0	0	6
TCGA-85-7699	0	0	105		TCGA-BC-4073	0	0	35		TCGA-AR-A2LK	0	0	17		TCGA-EW-A2FV	1	1	6
TCGA-24-1469	0	0	105		TCGA-BC-A3KF	0	0	35		TCGA-B6-A0RQ	0	0	17		TCGA-HN-A2OB	0	0	6
TCGA-24-2288	0	0	105		TCGA-DD-A119	0	0	35		TCGA-BH-A0BG	0	0	17		TCGA-OL-A66H	0	0	6
TCGA-EB-A5FP	0	0	105		TCGA-DD-AAD3	0	0	35		TCGA-BH-A0E0	0	0	17		TCGA-PL-A8LX	0	0	6
TCGA-VQ-A91X	0	0	105		TCGA-DD-AAED	0	0	35		TCGA-BH-A0HW	0	0	17		TCGA-EA-A5ZD	0	0	6
TCGA-AX-A2H4	0	0	105		TCGA-DD-AAW3	0	0	35		TCGA-BH-A18N	0	0	17		TCGA-VR-A8ET	0	0	6
TCGA-EY-A1H0	0	0	105		TCGA-G3-A25T	0	0	35		TCGA-BH-A204	0	0	17		TCGA-06-5410	0	0	6
TCGA-G2-A2EL	0	0	104		TCGA-G3-A25Z	0	0	35		TCGA-C8-A12X	0	0	17		TCGA-32-1980	0	0	6
TCGA-GC-A3I6	0	0	104		TCGA-KR-A7K7	0	0	35		TCGA-C8-A26Z	0	0	17		TCGA-CV-A464	0	0	6
TCGA-R3-A69X	0	0	104		TCGA-WQ-AB4B	0	0	35		TCGA-D8-A1X6	0	0	17		TCGA-D6-6827	0	0	6
TCGA-GM-A2DH	0	0	104		TCGA-50-5939	0	0	35		TCGA-D8-A1XB	0	0	17		TCGA-KL-8328	0	0	6
TCGA-55-6970	0	0	104		TCGA-55-8090	0	0	35		TCGA-D8-A1XR	0	0	17		TCGA-KM-8477	0	0	6
TCGA-55-7724	0	0	104		TCGA-71-8520	0	0	35		TCGA-D8-A73X	0	0	17		TCGA-KN-8418	0	0	6
TCGA-78-7150	1	1	104		TCGA-86-7953	0	0	35		TCGA-E2-A14T	0	0	17		TCGA-KO-8407	0	0	6
TCGA-86-A456	0	0	104		TCGA-56-8304	0	0	35		TCGA-E2-A15H	0	0	17		TCGA-KO-8409	0	0	6
TCGA-97-A4M3	0	0	104		TCGA-77-8130	0	0	35		TCGA-E2-A15K	0	0	17		TCGA-AK-3453	0	0	6
TCGA-22-4601	0	0	104		TCGA-98-8020	0	0	35		TCGA-EW-A1P4	0	0	17		TCGA-DV-A4VZ	0	0	6
TCGA-66-2788	0	0	104		TCGA-04-1362	0	0	35		TCGA-GM-A2DA	0	0	17		TCGA-5P-A9K8	0	0	6
TCGA-68-7755	0	0	104		TCGA-23-1021	0	0	35		TCGA-GM-A2DF	0	0	17		TCGA-BQ-5885	0	0	6
TCGA-85-8355	0	0	104		TCGA-61-2110	0	0	35		TCGA-OL-A5D7	0	0	17		TCGA-BQ-5894	0	0	6
TCGA-JW-A5VJ	0	0	103		TCGA-DX-A6YR	0	0	35		TCGA-OL-A5RU	0	0	17		TCGA-DW-7963	0	0	6
TCGA-VS-A959	0	0	103		TCGA-K1-A6RV	0	0	35		TCGA-OL-A66N	0	0	17		TCGA-P4-A5ED	0	0	6
TCGA-VS-A9UH	0	0	103		TCGA-QQ-A5V9	0	0	35		TCGA-C5-A2LT	0	0	17		TCGA-CC-A9FV	0	0	6
TCGA-L5-A8NQ	0	0	103		TCGA-RD-A8MV	0	0	35		TCGA-FU-A3TX	0	0	17		TCGA-L4-A4E6	0	0	6
TCGA-CN-6995	0	0	103		TCGA-BG-A0M7	0	0	35		TCGA-VS-A9UO	0	0	17		TCGA-60-2697	0	0	6
TCGA-2Y-A9H3	0	0	103		TCGA-BS-A0TI	0	0	35		TCGA-W5-AA2G	0	0	17		TCGA-60-2716	0	0	6
TCGA-55-7914	0	0	103		TCGA-EY-A1GT	0	0	35		TCGA-A6-2685	0	0	17		TCGA-MQ-A6BQ	0	0	6
TCGA-55-A494	0	0	103		TCGA-FI-A3PV	0	0	35		TCGA-27-1830	0	0	17		TCGA-TS-A7P3	0	0	6
TCGA-64-1677	0	0	103		TCGA-E7-A519	0	0	34		TCGA-28-5220	0	0	17		TCGA-UT-A88C	1	1	6
TCGA-18-5592	0	0	103		TCGA-FD-A5BR	0	0	34		TCGA-06-0184	0	0	17		TCGA-3A-A9I5	0	0	6
TCGA-22-5485	0	0	103		TCGA-GU-A763	0	0	34		TCGA-CN-4742	0	0	17		TCGA-3A-A9I7	0	0	6
TCGA-58-8391	0	0	103		TCGA-GV-A3JW	0	0	34		TCGA-CQ-5324	1	1	17		TCGA-3A-A9IR	0	0	6
TCGA-63-A5MU	0	0	103		TCGA-LC-A66R	0	0	34		TCGA-KM-8443	0	0	17		TCGA-FB-A4P5	0	0	6
TCGA-77-7142	0	0	103		TCGA-UY-A8OC	0	0	34		TCGA-B0-5084	0	0	17		TCGA-HZ-A49H	0	0	6
TCGA-94-A5I4	0	0	103		TCGA-XF-A8HH	0	0	34		TCGA-B0-5692	0	0	17		TCGA-QR-A6GR	0	0	6
TCGA-24-1845	0	0	103		TCGA-TM-A7C3	0	0	34		TCGA-B2-A4SR	0	0	17		TCGA-QR-A6ZZ	0	0	6
TCGA-2F-A9KR	0	0	102		TCGA-A7-A0CJ	0	0	34		TCGA-B8-4146	0	0	17		TCGA-QR-A707	0	0	6
TCGA-CU-A3YL	0	0	102		TCGA-A8-A075	0	0	34		TCGA-B8-4148	0	0	17		TCGA-QR-A70V	0	0	6
TCGA-FJ-A3ZF	0	0	102		TCGA-AO-A03N	0	0	34		TCGA-BP-4973	0	0	17		TCGA-QR-A7IN	0	0	6
TCGA-GC-A6I3	0	0	102		TCGA-AR-A255	0	0	34		TCGA-BP-4991	0	0	17		TCGA-QT-A69Q	0	0	6
TCGA-DG-A2KK	0	0	102		TCGA-B6-A0IB	0	0	34		TCGA-BP-4998	0	0	17		TCGA-RW-A67V	0	0	6
TCGA-UC-A7PG	0	0	102		TCGA-BH-A0B0	0	0	34		TCGA-BP-5001	0	0	17		TCGA-RW-A685	1	1	6
TCGA-55-6982	0	0	102		TCGA-BH-A1FC	0	0	34		TCGA-BP-5175	0	0	17		TCGA-RW-A68F	0	0	6
TCGA-55-8510	0	0	102		TCGA-E2-A14W	0	0	34		TCGA-BP-5192	0	0	17		TCGA-S7-A7X1	0	0	6
TCGA-91-6830	0	0	102		TCGA-E2-A9RU	0	0	34		TCGA-CJ-4901	1	1	17		TCGA-WB-A819	0	0	6
TCGA-91-7771	0	0	102		TCGA-EW-A6SB	0	0	34		TCGA-CJ-6032	0	0	17		TCGA-WB-A81K	0	0	6
TCGA-97-8174	0	0	102		TCGA-Z7-A8R6	0	0	34		TCGA-A4-7584	0	0	17		TCGA-WB-A81R	0	0	6
TCGA-77-8139	0	0	102		TCGA-C5-A1BE	0	0	34		TCGA-A4-7996	0	0	17		TCGA-CH-5740	0	0	6
TCGA-85-6561	0	0	102		TCGA-C5-A1M8	0	0	34		TCGA-B9-A5W8	0	0	17		TCGA-CH-5794	0	0	6
TCGA-85-A4CL	0	0	102		TCGA-C5-A7CL	0	0	34		TCGA-B9-A5W9	0	0	17		TCGA-EJ-5502	0	0	6
TCGA-13-1481	0	0	102		TCGA-C5-A7UC	0	0	34		TCGA-BQ-5880	0	0	17		TCGA-EJ-5512	0	0	6
TCGA-FI-A2D4	0	0	102		TCGA-EA-A5ZF	0	0	34		TCGA-BQ-5881	0	0	17		TCGA-EJ-5515	0	0	6
TCGA-FD-A3B5	0	0	101		TCGA-MA-AA3W	0	0	34		TCGA-BQ-5893	0	0	17		TCGA-EJ-7315	0	0	6
TCGA-UY-A78N	0	0	101		TCGA-VS-A8QM	0	0	34		TCGA-EV-5901	0	0	17		TCGA-EJ-7318	0	0	6
TCGA-ZF-A9R9	0	0	101		TCGA-VS-A9UV	0	0	34		TCGA-G7-6795	0	0	17		TCGA-EJ-7793	0	0	6
TCGA-2H-A9GK	0	0	101		TCGA-ZJ-AAXJ	0	0	34		TCGA-IZ-8195	0	0	17		TCGA-EJ-7794	0	0	6
TCGA-49-6742	0	0	101		TCGA-F5-6702	0	0	34		TCGA-PJ-A5Z9	0	0	17		TCGA-EJ-A46D	0	0	6
TCGA-34-A5IX	0	0	101		TCGA-AA-3858	0	0	34		TCGA-SX-A71R	0	0	17		TCGA-EJ-A7NF	0	0	6
TCGA-43-A56V	0	0	101		TCGA-AA-A01Z	0	0	34		TCGA-DD-A1EH	0	0	17		TCGA-EJ-A7NH	0	0	6
TCGA-56-8622	0	0	101		TCGA-AD-6890	0	0	34		TCGA-DD-A3A4	0	0	17		TCGA-H9-A6BY	0	0	6
TCGA-A8-A06Q	0	0	100		TCGA-CM-6166	0	0	34		TCGA-ED-A7PX	0	0	17		TCGA-HC-7209	0	0	6
TCGA-DS-A0VM	0	0	100		TCGA-F4-6463	0	0	34		TCGA-ZP-A9D2	0	0	17		TCGA-KC-A7F3	0	0	6
TCGA-CK-6751	0	0	100		TCGA-NH-A6GA	0	0	34		TCGA-50-5055	0	0	17		TCGA-KC-A7F5	0	0	6
TCGA-FF-8041	0	0	100		TCGA-GS-A9TX	0	0	34		TCGA-50-8460	0	0	17		TCGA-KK-A7AU	0	0	6
TCGA-55-1596	0	0	100		TCGA-IG-A97I	0	0	34		TCGA-55-8512	0	0	17		TCGA-QU-A6IP	0	0	6
TCGA-22-1012	0	0	100		TCGA-L5-A4OF	0	0	34		TCGA-62-A46Y	0	0	17		TCGA-V1-A8MM	0	0	6
TCGA-22-5483	0	0	100		TCGA-VR-AA7D	1	1	34		TCGA-86-8280	0	0	17		TCGA-V1-A8MU	0	0	6
TCGA-33-AAS8	0	0	100		TCGA-06-2564	0	0	34		TCGA-86-8668	0	0	17		TCGA-VN-A88I	0	0	6
TCGA-39-5037	0	0	100		TCGA-14-1823	0	0	34		TCGA-97-7553	0	0	17		TCGA-VN-A88L	0	0	6
TCGA-85-7710	0	0	100		TCGA-32-1982	0	0	34		TCGA-97-A4M1	0	0	17		TCGA-XJ-A9DQ	0	0	6
TCGA-85-8049	0	0	100		TCGA-14-0871	0	0	34		TCGA-MP-A4T9	0	0	17		TCGA-XK-AAJR	0	0	6
TCGA-92-8064	0	0	100		TCGA-CN-6022	0	0	34		TCGA-NJ-A7XG	0	0	17		TCGA-ZG-A9LS	0	0	6
TCGA-IN-A6RO	0	0	100		TCGA-CQ-A4CI	0	0	34		TCGA-24-1551	0	0	17		TCGA-DX-A2J4	0	0	6
TCGA-AP-A05N	0	0	100		TCGA-CR-6473	0	0	34		TCGA-29-1688	0	0	17		TCGA-MJ-A68J	0	0	6
TCGA-FD-A3SJ	0	0	99		TCGA-CR-7382	0	0	34		TCGA-61-1741	0	0	17		TCGA-PC-A5DK	0	0	6
TCGA-G2-AA3D	0	0	99		TCGA-CV-6955	0	0	34		TCGA-61-1995	0	0	17		TCGA-UE-A6QT	0	0	6
TCGA-C5-A1BL	0	0	99		TCGA-CV-7104	0	0	34		TCGA-13-0804	0	0	17		TCGA-WK-A8XQ	0	0	6
TCGA-C5-A7UH	0	0	99		TCGA-CV-7253	0	0	34		TCGA-3A-A9IB	0	0	17		TCGA-Z4-A8JB	0	0	6
TCGA-WA-A7GZ	1	1	99		TCGA-HD-A6I0	0	0	34		TCGA-3A-A9IC	0	0	17		TCGA-Z4-AAPF	0	0	6
TCGA-CC-A8HT	0	0	99		TCGA-A3-3317	0	0	34		TCGA-FB-A7DR	0	0	17		TCGA-2G-AAG3	0	0	6
TCGA-55-7283	0	0	99		TCGA-A3-3376	0	0	34		TCGA-FB-AAPS	0	0	17		TCGA-2G-AAGI	0	0	6
TCGA-75-5125	0	0	99		TCGA-B0-4821	1	1	34		TCGA-HZ-8637	0	0	17		TCGA-2G-AAGJ	0	0	6
TCGA-56-A49D	0	0	99		TCGA-B0-5080	0	0	34		TCGA-HZ-A77P	0	0	17		TCGA-2G-AAGS	0	0	6
TCGA-E7-A7DU	0	0	98		TCGA-CJ-6027	0	0	34		TCGA-IB-A5SS	0	0	17		TCGA-2G-AAGW	0	0	6
TCGA-UY-A78L	0	0	98		TCGA-2Z-A9JL	1	1	34		TCGA-S4-A8RO	0	0	17		TCGA-2G-AAHA	0	0	6
TCGA-FU-A40J	0	0	98		TCGA-B1-A654	0	0	34		TCGA-2A-A8VO	0	0	17		TCGA-2G-AAHP	0	0	6
TCGA-CK-4950	0	0	98		TCGA-B1-A657	0	0	34		TCGA-EJ-5496	0	0	17		TCGA-2X-A9D6	0	0	6
TCGA-DD-AACQ	0	0	98		TCGA-P4-AAVL	0	0	34		TCGA-EJ-5504	0	0	17		TCGA-SB-A6J6	0	0	6
TCGA-44-A47A	0	0	98		TCGA-Y8-A897	0	0	34		TCGA-EJ-5524	0	0	17		TCGA-VF-A8AB	0	0	6
TCGA-22-0940	0	0	98		TCGA-2Y-A9HB	0	0	34		TCGA-G9-6499	0	0	17		TCGA-XE-A8H1	0	0	6
TCGA-AJ-A3OL	0	0	98		TCGA-DD-A73F	1	1	34		TCGA-HC-7231	0	0	17		TCGA-XE-A9SE	0	0	6
TCGA-QS-A5YR	0	0	98		TCGA-DD-AADK	1	1	34		TCGA-HC-8259	0	0	17		TCGA-XE-AANI	0	0	6
TCGA-DK-A1AD	0	0	97		TCGA-FV-A4ZQ	0	0	34		TCGA-HC-A8D1	0	0	17		TCGA-XE-AAO3	0	0	6
TCGA-DK-AA6U	0	0	97		TCGA-G3-A25U	0	0	34		TCGA-HI-7168	0	0	17		TCGA-XE-AAOJ	0	0	6
TCGA-K4-A3WU	0	0	97		TCGA-G3-A7M7	0	0	34		TCGA-J4-A83M	0	0	17		TCGA-XY-A9T9	0	0	6
TCGA-KQ-A41O	0	0	97		TCGA-RC-A7SB	0	0	34		TCGA-KK-A59X	0	0	17		TCGA-YU-A90W	0	0	6
TCGA-FF-A7CR	0	0	97		TCGA-44-2655	0	0	34		TCGA-KK-A7AQ	0	0	17		TCGA-2G-AALS	0	0	6
TCGA-IG-A4QS	0	0	97		TCGA-50-5936	0	0	34		TCGA-KK-A8I9	0	0	17		TCGA-4V-A9QM	0	0	6
TCGA-L5-A8NE	0	0	97		TCGA-50-8457	0	0	34		TCGA-YL-A8SL	0	0	17		TCGA-4V-A9QU	0	0	6
TCGA-CV-7418	0	0	97		TCGA-69-7760	1	1	34		TCGA-YL-A8SO	0	0	17		TCGA-X7-A8D6	0	0	6
TCGA-F7-A623	0	0	97		TCGA-69-8254	0	0	34		TCGA-3B-A9I0	0	0	17		TCGA-X7-A8DE	0	0	6
TCGA-55-7911	0	0	97		TCGA-73-7498	0	0	34		TCGA-DX-A2IZ	0	0	17		TCGA-X7-A8M0	0	0	6
TCGA-55-8204	1	1	97		TCGA-24-1434	0	0	34		TCGA-DX-A3M1	0	0	17		TCGA-XM-A8RI	0	0	6
TCGA-63-7020	0	0	97		TCGA-61-2003	0	0	34		TCGA-DX-A6B8	0	0	17		TCGA-XM-AAZ1	0	0	6
TCGA-63-7021	0	0	97		TCGA-61-2092	0	0	34		TCGA-DX-A6Z0	0	0	17		TCGA-BJ-A0ZA	0	0	6
TCGA-77-6845	0	0	97		TCGA-2L-AAQL	0	0	34		TCGA-FX-A8OO	0	0	17		TCGA-BJ-A0ZC	0	0	6
TCGA-09-2051	0	0	97		TCGA-EJ-5519	0	0	34		TCGA-KD-A5QT	1	1	17		TCGA-BJ-A18Y	0	0	6
TCGA-RD-A7BT	0	0	97		TCGA-EJ-A65F	0	0	34		TCGA-KF-A41W	0	0	17		TCGA-BJ-A191	0	0	6
TCGA-D1-A17R	0	0	97		TCGA-QU-A6IM	0	0	34		TCGA-MB-A5YA	0	0	17		TCGA-BJ-A28Z	0	0	6
TCGA-C4-A0F1	0	0	96		TCGA-DX-AATS	0	0	34		TCGA-MJ-A68H	0	0	17		TCGA-BJ-A2N8	0	0	6
TCGA-AR-A251	0	0	96		TCGA-DX-AB2O	0	0	34		TCGA-SI-AA8B	0	0	17		TCGA-BJ-A2N9	0	0	6
TCGA-LD-A74U	0	0	96		TCGA-VQ-A8DT	0	0	34		TCGA-WK-A8XX	0	0	17		TCGA-BJ-A45G	0	0	6
TCGA-EK-A2R8	0	0	96		TCGA-VQ-A8PK	0	0	34		TCGA-ER-A2NF	0	0	17		TCGA-BJ-A4O8	0	0	6
TCGA-AA-3855	0	0	96		TCGA-EL-A3CT	0	0	34		TCGA-ER-A2NF	0	0	17		TCGA-CE-A3ME	0	0	6
TCGA-BB-4223	0	0	96		TCGA-A5-A1OK	0	0	34		TCGA-IN-AB1V	0	0	17		TCGA-DE-A4M9	0	0	6
TCGA-49-4514	0	0	96		TCGA-OR-A5JY	0	0	33		TCGA-R5-A7ZF	0	0	17		TCGA-DJ-A13X	0	0	6
TCGA-99-8033	0	0	96		TCGA-CU-A72E	0	0	33		TCGA-WZ-A7V5	0	0	17		TCGA-DJ-A1QO	0	0	6
TCGA-MP-A4TI	0	0	96		TCGA-DK-AA6M	0	0	33		TCGA-YU-A94I	0	0	17		TCGA-DJ-A2PW	0	0	6
TCGA-37-4135	0	0	96		TCGA-FD-A5BT	0	0	33		TCGA-4C-A93U	0	0	17		TCGA-DJ-A2Q5	0	0	6
TCGA-BT-A20O	0	0	95		TCGA-FD-A62N	0	0	33		TCGA-N5-A4RM	0	0	17		TCGA-DJ-A2QA	0	0	6
TCGA-C4-A0EZ	0	0	95		TCGA-XF-A9SU	0	0	33		TCGA-NA-A4QV	0	0	17		TCGA-DJ-A3UQ	0	0	6
TCGA-CU-A5W6	0	0	95		TCGA-XF-AAMT	0	0	33		TCGA-5S-A9Q8	0	0	17		TCGA-DJ-A3VE	0	0	6
TCGA-E7-A5KF	0	0	95		TCGA-DU-7010	0	0	33		TCGA-AJ-A3I9	0	0	17		TCGA-DJ-A3VG	0	0	6
TCGA-UY-A78O	0	0	95		TCGA-FG-A4MU	0	0	33		TCGA-AP-A5FX	1	1	17		TCGA-DJ-A3VK	0	0	6
TCGA-XF-A9SM	0	0	95		TCGA-FG-A87Q	0	0	33		TCGA-AX-A1C7	0	0	17		TCGA-E3-A3E1	0	0	6
TCGA-XF-AAMQ	0	0	95		TCGA-S9-A6TS	0	0	33		TCGA-AX-A3G4	0	0	17		TCGA-EL-A3GW	0	0	6
TCGA-A8-A08L	0	0	95		TCGA-A8-A092	0	0	33		TCGA-B5-A3FD	0	0	17		TCGA-EL-A3H4	0	0	6
TCGA-D6-A6EK	0	0	95		TCGA-A8-A09R	0	0	33		TCGA-BG-A0M6	0	0	17		TCGA-EL-A3H8	0	0	6
TCGA-55-A492	0	0	95		TCGA-AC-A4ZE	0	0	33		TCGA-BG-A186	0	0	17		TCGA-EL-A3ZQ	0	0	6
TCGA-22-4593	0	0	95		TCGA-AC-A62X	0	0	33		TCGA-DF-A2L0	0	0	17		TCGA-EL-A4K4	0	0	6
TCGA-33-4587	0	0	95		TCGA-B6-A0IQ	0	0	33		TCGA-DI-A1C3	0	0	17		TCGA-EM-A1CT	0	0	6
TCGA-33-A5GW	0	0	95		TCGA-BH-A0B5	0	0	33		TCGA-E6-A8L9	0	0	17		TCGA-EM-A22M	0	0	6
TCGA-52-7809	1	1	95		TCGA-C8-A131	1	1	33		TCGA-EY-A3QX	0	0	17		TCGA-EM-A2CO	0	0	6
TCGA-60-2722	0	0	95		TCGA-E2-A14N	0	0	33		TCGA-OR-A5J6	0	0	16		TCGA-EM-A2CR	0	0	6
TCGA-61-1998	0	0	95		TCGA-E2-A158	0	0	33		TCGA-OR-A5K6	0	0	16		TCGA-EM-A3SU	0	0	6
TCGA-AJ-A3QS	0	0	95		TCGA-E9-A1ND	0	0	33		TCGA-E7-A4XJ	0	0	16		TCGA-ET-A25J	0	0	6
TCGA-DI-A1NO	0	0	95		TCGA-OL-A66P	0	0	33		TCGA-KQ-A41Q	0	0	16		TCGA-ET-A2MX	0	0	6
TCGA-UY-A9PA	0	0	94		TCGA-BI-A0VS	0	0	33		TCGA-DU-7306	0	0	16		TCGA-ET-A3BN	0	0	6
TCGA-XF-A8HD	0	0	94		TCGA-MA-AA3X	0	0	33		TCGA-DU-A7TJ	0	0	16		TCGA-ET-A3DO	0	0	6
TCGA-EA-A43B	0	0	94		TCGA-VS-AA62	0	0	33		TCGA-E1-5319	0	0	16		TCGA-ET-A40Q	0	0	6
TCGA-AG-A026	0	0	94		TCGA-ZJ-AAXD	0	0	33		TCGA-E1-A7YJ	0	0	16		TCGA-FE-A231	0	0	6
TCGA-G3-A7M5	0	0	94		TCGA-AG-A01Y	0	0	33		TCGA-E1-A7YK	1	1	16		TCGA-FK-A3SG	0	0	6
TCGA-55-8508	0	0	94		TCGA-EI-7004	0	0	33		TCGA-FG-5963	0	0	16		TCGA-FY-A3NM	0	0	6
TCGA-NJ-A55R	0	0	94		TCGA-AA-A01X	0	0	33		TCGA-HT-7478	0	0	16		TCGA-FY-A3NN	0	0	6
TCGA-21-1071	0	0	94		TCGA-CK-6747	0	0	33		TCGA-HT-7479	0	0	16		TCGA-FY-A3R6	0	0	6
TCGA-22-5492	0	0	94		TCGA-D5-6898	0	0	33		TCGA-HT-7481	0	0	16		TCGA-FY-A40L	0	0	6
TCGA-34-5236	0	0	94		TCGA-DM-A288	0	0	33		TCGA-HT-A5R5	0	0	16		TCGA-FY-A4B4	0	0	6
TCGA-66-2786	1	1	94		TCGA-XP-A8T6	0	0	33		TCGA-HW-8321	0	0	16		TCGA-H2-A3RH	0	0	6
TCGA-EB-A4P0	0	0	94		TCGA-06-A7TK	0	0	33		TCGA-R8-A6MO	0	0	16		TCGA-J8-A3O1	0	0	6
TCGA-D1-A17F	0	0	94		TCGA-27-1831	0	0	33		TCGA-S9-A6TZ	0	0	16		TCGA-KS-A41I	0	0	6
TCGA-UY-A9PH	0	0	93		TCGA-32-2632	0	0	33		TCGA-S9-A6U6	0	0	16		TCGA-KS-A4I5	0	0	6
TCGA-AA-3994	0	0	93		TCGA-BB-4224	0	0	33		TCGA-S9-A6WQ	0	0	16		TCGA-KS-A4ID	0	0	6
TCGA-AY-6196	0	0	93		TCGA-BB-4225	0	0	33		TCGA-S9-A7IZ	0	0	16		TCGA-MK-A4N7	0	0	6
TCGA-CA-5254	0	0	93		TCGA-CN-5366	0	0	33		TCGA-TM-A84J	0	0	16		TCGA-AP-A0LV	0	0	6
TCGA-DM-A28F	0	0	93		TCGA-CQ-7072	0	0	33		TCGA-WH-A86K	0	0	16		TCGA-AX-A062	0	0	6
TCGA-GS-A9TT	1	1	93		TCGA-CQ-A4CG	0	0	33		TCGA-5T-A9QA	0	0	16		TCGA-DI-A2QT	0	0	6
TCGA-GS-A9TW	0	0	93		TCGA-CR-5247	0	0	33		TCGA-A1-A0SE	0	0	16		TCGA-V4-A9EQ	0	0	6
TCGA-49-4505	0	0	93		TCGA-CR-7380	0	0	33		TCGA-A2-A04Q	0	0	16		TCGA-V3-A9ZY	0	0	6
TCGA-55-A493	0	0	93		TCGA-CV-6951	0	0	33		TCGA-A2-A0SU	0	0	16		TCGA-V4-A9F7	0	0	6
TCGA-43-A56U	0	0	93		TCGA-CV-A6JY	0	0	33		TCGA-A7-A0CH	0	0	16		TCGA-VD-AA8R	0	0	6
TCGA-85-8664	0	0	93		TCGA-D6-A6EN	0	0	33		TCGA-A8-A0A4	0	0	16		TCGA-V4-A9EI	0	0	6
TCGA-O2-A5IB	0	0	93		TCGA-HD-8314	0	0	33		TCGA-AN-A0FN	0	0	16		TCGA-YZ-A984	0	0	6
TCGA-61-2095	0	0	93		TCGA-QK-A6V9	0	0	33		TCGA-AR-A24K	0	0	16		TCGA-WC-A87Y	0	0	6
TCGA-GU-AATQ	0	0	92		TCGA-B0-5695	0	0	33		TCGA-AR-A24V	0	0	16		TCGA-V4-A9E5	0	0	6
TCGA-A6-5659	0	0	92		TCGA-B2-4099	0	0	33		TCGA-B6-A0I2	0	0	16		TCGA-OR-A5J3	0	0	5
TCGA-AZ-4614	0	0	92		TCGA-B2-5641	0	0	33		TCGA-B6-A0IC	0	0	16		TCGA-OR-A5LC	0	0	5
TCGA-CX-7086	0	0	92		TCGA-B8-4143	0	0	33		TCGA-B6-A0RO	0	0	16		TCGA-OR-A5LH	0	0	5
TCGA-HD-8635	0	0	92		TCGA-BP-4967	0	0	33		TCGA-B6-A0WX	0	0	16		TCGA-4Z-AA7N	0	0	5
TCGA-DD-AACP	0	0	92		TCGA-BP-5168	0	0	33		TCGA-B6-A0WY	0	0	16		TCGA-CS-4938	0	0	5
TCGA-56-8504	0	0	92		TCGA-CJ-5683	0	0	33		TCGA-BH-A0B7	0	0	16		TCGA-DU-8163	0	0	5
TCGA-60-2704	0	0	92		TCGA-CZ-4856	0	0	33		TCGA-BH-A0RX	0	0	16		TCGA-DU-A6S6	0	0	5
TCGA-63-A5MH	0	0	92		TCGA-EU-5906	0	0	33		TCGA-BH-A18L	0	0	16		TCGA-DU-A7TG	0	0	5
TCGA-VQ-A8PH	0	0	92		TCGA-2Z-A9JT	0	0	33		TCGA-BH-A202	0	0	16		TCGA-FG-8189	0	0	5
TCGA-BG-A0VX	0	0	92		TCGA-5P-A9K3	1	1	33		TCGA-BH-A42V	0	0	16		TCGA-HT-7855	0	0	5
TCGA-DK-AA6P	0	0	91		TCGA-B9-4114	0	0	33		TCGA-C8-A8HR	0	0	16		TCGA-HT-A61A	0	0	5
TCGA-A2-A0EY	0	0	91		TCGA-GL-A9DC	0	0	33		TCGA-D8-A73W	0	0	16		TCGA-HW-7495	0	0	5
TCGA-EK-A3GJ	0	0	91		TCGA-HE-A5NH	0	0	33		TCGA-E2-A1L8	0	0	16		TCGA-QH-A6CU	0	0	5
TCGA-GS-A9TQ	0	0	91		TCGA-UZ-A9PX	0	0	33		TCGA-E2-A56Z	0	0	16		TCGA-RY-A840	0	0	5
TCGA-CR-6484	0	0	91		TCGA-Y8-A895	0	0	33		TCGA-E9-A1NC	1	1	16		TCGA-S9-A7J2	0	0	5
TCGA-UF-A71A	0	0	91		TCGA-2Y-A9H0	0	0	33		TCGA-LL-A740	0	0	16		TCGA-TM-A84S	0	0	5
TCGA-HE-7130	0	0	91		TCGA-CC-A3MC	0	0	33		TCGA-OL-A66L	0	0	16		TCGA-VM-A8CH	0	0	5
TCGA-DD-A1EB	0	0	91		TCGA-DD-A4NG	0	0	33		TCGA-S3-A6ZF	0	0	16		TCGA-VV-A86M	0	0	5
TCGA-ED-A4XI	0	0	91		TCGA-DD-A4NJ	0	0	33		TCGA-C5-A1ME	0	0	16		TCGA-WY-A85A	0	0	5
TCGA-G3-AAV0	0	0	91		TCGA-EP-A2KB	0	0	33		TCGA-EK-A3GN	0	0	16		TCGA-R8-A6YH	0	0	5
TCGA-18-3406	0	0	91		TCGA-G3-A25V	0	0	33		TCGA-EX-A1H5	0	0	16		TCGA-A2-A0CK	0	0	5
TCGA-18-3417	0	0	91		TCGA-O8-A75V	0	0	33		TCGA-EX-A69L	0	0	16		TCGA-A2-A1FZ	1	1	5
TCGA-58-8388	0	0	91		TCGA-YA-A8S7	1	1	33		TCGA-IR-A3LC	0	0	16		TCGA-A2-A3KD	0	0	5
TCGA-B5-A0JN	0	0	91		TCGA-55-6975	0	0	33		TCGA-JW-A5VK	0	0	16		TCGA-AC-A3HN	0	0	5
TCGA-BH-A18V	0	0	90		TCGA-55-7728	0	0	33		TCGA-RA-A741	0	0	16		TCGA-AN-A0XT	0	0	5
TCGA-C5-A8XK	0	0	90		TCGA-86-8076	0	0	33		TCGA-VS-A8EG	0	0	16		TCGA-AO-A12A	0	0	5
TCGA-AA-3666	0	0	90		TCGA-91-6840	0	0	33		TCGA-W5-AA2W	0	0	16		TCGA-AO-A12B	0	0	5
TCGA-73-4662	0	0	90		TCGA-MP-A4TH	0	0	33		TCGA-YR-A95A	0	0	16		TCGA-AQ-A1H3	0	0	5
TCGA-78-7542	0	0	90		TCGA-29-1776	0	0	33		TCGA-06-2567	0	0	16		TCGA-AR-A2LQ	0	0	5
TCGA-95-A4VK	0	0	90		TCGA-31-1959	0	0	33		TCGA-06-5859	0	0	16		TCGA-B6-A0WS	0	0	5
TCGA-MP-A4SY	1	1	90		TCGA-HZ-8636	0	0	33		TCGA-14-1825	0	0	16		TCGA-BH-A28Q	0	0	5
TCGA-33-A4WN	0	0	90		TCGA-IB-7652	0	0	33		TCGA-06-0750	0	0	16		TCGA-BH-A8G0	0	0	5
TCGA-56-8626	0	0	90		TCGA-DX-A1L0	0	0	33		TCGA-06-0882	0	0	16		TCGA-E2-A10A	0	0	5
TCGA-60-2708	0	0	90		TCGA-DX-A6BF	0	0	33		TCGA-BB-4228	0	0	16		TCGA-E9-A22D	0	0	5
TCGA-85-7843	0	0	90		TCGA-DX-A8BT	0	0	33		TCGA-CV-7421	0	0	16		TCGA-E9-A245	0	0	5
TCGA-85-8666	0	0	90		TCGA-DX-AB2T	0	0	33		TCGA-CV-A465	0	0	16		TCGA-EW-A1IX	0	0	5
TCGA-90-A59Q	0	0	90		TCGA-WK-A8XT	0	0	33		TCGA-IQ-A61O	0	0	16		TCGA-EW-A1P5	0	0	5
TCGA-94-8035	0	0	90		TCGA-A5-A0GN	0	0	33		TCGA-MZ-A5BI	0	0	16		TCGA-GM-A2DN	0	0	5
TCGA-13-1488	0	0	90		TCGA-AP-A0L8	0	0	33		TCGA-KL-8339	0	0	16		TCGA-LL-A5YM	0	0	5
TCGA-23-1032	0	0	90		TCGA-AP-A0LI	0	0	33		TCGA-A3-3380	0	0	16		TCGA-OL-A5RY	0	0	5
TCGA-13-0760	0	0	90		TCGA-BG-A18A	0	0	33		TCGA-B0-5109	0	0	16		TCGA-EK-A2RE	0	0	5
TCGA-BF-A1PZ	0	0	90		TCGA-BG-A2AE	0	0	33		TCGA-B2-4098	0	0	16		TCGA-KL-8325	0	0	5
TCGA-BS-A0U7	0	0	90		TCGA-BK-A4ZD	0	0	33		TCGA-B4-5843	0	0	16		TCGA-KL-8346	0	0	5
TCGA-5N-A9KM	0	0	89		TCGA-BS-A0V8	0	0	33		TCGA-BP-5170	0	0	16		TCGA-KO-8406	0	0	5
TCGA-A2-A0EQ	0	0	89		TCGA-D1-A1NW	0	0	33		TCGA-BP-5178	1	1	16		TCGA-AK-3427	0	0	5
TCGA-DG-A2KM	0	0	89		TCGA-EY-A212	0	0	33		TCGA-CJ-5684	1	1	16		TCGA-B8-5165	0	0	5
TCGA-DM-A1D8	0	0	89		TCGA-EY-A3L3	0	0	33		TCGA-CZ-5987	0	0	16		TCGA-BP-4760	0	0	5
TCGA-NH-A6GB	0	0	89		TCGA-ZF-AA4U	0	0	32		TCGA-EU-5905	0	0	16		TCGA-BP-4994	0	0	5
TCGA-FA-A82F	0	0	89		TCGA-DU-A5TY	0	0	32		TCGA-A4-7734	0	0	16		TCGA-2Z-A9JI	0	0	5
TCGA-RQ-A68N	0	0	89		TCGA-HT-7860	0	0	32		TCGA-AL-3473	0	0	16		TCGA-2Z-A9JN	0	0	5
TCGA-64-5815	0	0	89		TCGA-A2-A0YD	0	0	32		TCGA-B9-7268	0	0	16		TCGA-BQ-5891	1	1	5
TCGA-86-7711	0	0	89		TCGA-A8-A06U	0	0	32		TCGA-BQ-5886	0	0	16		TCGA-75-6212	0	0	5
TCGA-MP-A4TC	0	0	89		TCGA-A8-A07G	0	0	32		TCGA-J7-6720	0	0	16		TCGA-MQ-A6BR	0	0	5
TCGA-22-1002	0	0	89		TCGA-AQ-A04H	0	0	32		TCGA-SX-A7SP	0	0	16		TCGA-2J-AABR	0	0	5
TCGA-34-5240	0	0	89		TCGA-AQ-A7U7	0	0	32		TCGA-KR-A7K2	0	0	16		TCGA-F2-A44H	0	0	5
TCGA-58-A46J	0	0	89		TCGA-AR-A0TW	0	0	32		TCGA-34-8456	0	0	16		TCGA-HZ-8002	0	0	5
TCGA-96-8169	0	0	89		TCGA-AR-A0TZ	0	0	32		TCGA-58-A46K	0	0	16		TCGA-HZ-8003	0	0	5
TCGA-DK-A3IK	0	0	88		TCGA-B6-A0RT	0	0	32		TCGA-3U-A98D	0	0	16		TCGA-US-A774	0	0	5
TCGA-GV-A6ZA	0	0	88		TCGA-B6-A0WZ	0	0	32		TCGA-NQ-A57I	0	0	16		TCGA-XD-AAUH	0	0	5
TCGA-BH-A0DZ	0	0	88		TCGA-BH-A0E6	0	0	32		TCGA-TS-A7OZ	0	0	16		TCGA-QR-A6GW	0	0	5
TCGA-C5-A7X5	0	0	88		TCGA-D8-A1JL	0	0	32		TCGA-ZN-A9VU	0	0	16		TCGA-QR-A6GX	0	0	5
TCGA-L5-A4OG	0	0	88		TCGA-D8-A27M	0	0	32		TCGA-29-1694	0	0	16		TCGA-QR-A6H1	0	0	5
TCGA-CR-7367	0	0	88		TCGA-E2-A109	0	0	32		TCGA-61-1911	0	0	16		TCGA-QR-A6H2	0	0	5
TCGA-DD-AADF	0	0	88		TCGA-E2-A14P	0	0	32		TCGA-13-0923	1	1	16		TCGA-QR-A6H4	0	0	5
TCGA-DD-AADO	1	1	88		TCGA-E2-A1L7	0	0	32		TCGA-13-0883	0	0	16		TCGA-QR-A70A	0	0	5
TCGA-G3-A25S	0	0	88		TCGA-E2-A1LS	0	0	32		TCGA-2J-AAB8	0	0	16		TCGA-QR-A70E	0	0	5
TCGA-33-4547	0	0	88		TCGA-GM-A3XL	0	0	32		TCGA-2J-AABH	0	0	16		TCGA-QR-A70G	0	0	5
TCGA-56-8629	1	1	88		TCGA-UL-AAZ6	0	0	32		TCGA-2J-AABK	0	0	16		TCGA-QR-A70H	0	0	5
TCGA-66-2770	0	0	88		TCGA-C5-A1MF	0	0	32		TCGA-3A-A9IN	0	0	16		TCGA-QR-A70T	0	0	5
TCGA-77-A5G1	0	0	88		TCGA-C5-A8XH	0	0	32		TCGA-HV-A5A4	0	0	16		TCGA-QT-A5XM	0	0	5
TCGA-85-8353	0	0	88		TCGA-C5-A8ZZ	0	0	32		TCGA-IB-7644	0	0	16		TCGA-QT-A5XN	0	0	5
TCGA-85-8580	0	0	88		TCGA-FU-A5XV	0	0	32		TCGA-QT-A5XO	0	0	16		TCGA-RM-A68T	0	0	5
TCGA-NK-A5CX	0	0	88		TCGA-VS-A8QF	1	1	32		TCGA-2A-A8VT	0	0	16		TCGA-RW-A684	0	0	5
TCGA-DK-A1AB	1	1	87		TCGA-AG-A01L	0	0	32		TCGA-2A-A8W1	0	0	16		TCGA-RW-A689	0	0	5
TCGA-FD-A62O	0	0	87		TCGA-AG-A020	0	0	32		TCGA-CH-5750	0	0	16		TCGA-RW-A68B	0	0	5
TCGA-XF-A9SZ	0	0	87		TCGA-AA-3973	0	0	32		TCGA-CH-5762	0	0	16		TCGA-RW-A68C	0	0	5
TCGA-C8-A12P	1	1	87		TCGA-AY-6386	0	0	32		TCGA-CH-5792	0	0	16		TCGA-S7-A7WQ	0	0	5
TCGA-A6-A566	0	0	87		TCGA-CA-5256	0	0	32		TCGA-EJ-5505	0	0	16		TCGA-SP-A6QC	0	0	5
TCGA-AA-3693	0	0	87		TCGA-G4-6322	0	0	32		TCGA-EJ-5514	0	0	16		TCGA-SP-A6QJ	0	0	5
TCGA-D6-A4ZB	0	0	87		TCGA-FA-A6HO	0	0	32		TCGA-EJ-5518	0	0	16		TCGA-SR-A6MU	0	0	5
TCGA-62-A46R	0	0	87		TCGA-IG-A3YA	0	0	32		TCGA-EJ-7784	0	0	16		TCGA-W2-A7HD	0	0	5
TCGA-80-5608	0	0	87		TCGA-IG-A97H	0	0	32		TCGA-G9-6329	0	0	16		TCGA-WB-A817	0	0	5
TCGA-18-4721	0	0	87		TCGA-06-A6S0	0	0	32		TCGA-G9-6496	0	0	16		TCGA-WB-A81G	0	0	5
TCGA-56-8082	0	0	87		TCGA-32-4213	0	0	32		TCGA-H9-7775	0	0	16		TCGA-WB-A81S	0	0	5
TCGA-77-7140	0	0	87		TCGA-76-4929	0	0	32		TCGA-HC-A6AL	0	0	16		TCGA-2A-AAYF	0	0	5
TCGA-77-8143	0	0	87		TCGA-76-4932	0	0	32		TCGA-J9-A52D	0	0	16		TCGA-CH-5738	0	0	5
TCGA-J1-A4AH	0	0	87		TCGA-12-0619	0	0	32		TCGA-M7-A71Z	0	0	16		TCGA-EJ-5499	0	0	5
TCGA-NC-A5HE	0	0	87		TCGA-06-0210	0	0	32		TCGA-M7-A721	0	0	16		TCGA-EJ-7328	0	0	5
TCGA-PG-A914	0	0	87		TCGA-06-0210	0	0	32		TCGA-M7-A724	0	0	16		TCGA-EJ-A7NJ	0	0	5
TCGA-4Z-AA87	0	0	86		TCGA-BA-6870	0	0	32		TCGA-MG-AAMC	1	1	16		TCGA-HC-7736	0	0	5
TCGA-DK-A2I1	0	0	86		TCGA-CQ-6224	0	0	32		TCGA-V1-A8MG	0	0	16		TCGA-HC-A76W	1	1	5
TCGA-5L-AAT0	0	0	86		TCGA-CQ-7069	0	0	32		TCGA-V1-A8WS	0	0	16		TCGA-J4-A83K	0	0	5
TCGA-D8-A1J9	0	0	86		TCGA-CR-7369	0	0	32		TCGA-VP-A87K	0	0	16		TCGA-KC-A4BR	1	1	5
TCGA-VS-A9UP	0	0	86		TCGA-CV-7416	0	0	32		TCGA-YL-A8SP	0	0	16		TCGA-M7-A71Y	0	0	5
TCGA-AA-A02O	0	0	86		TCGA-CV-A45R	0	0	32		TCGA-ZG-A9L0	0	0	16		TCGA-V1-A8MK	0	0	5
TCGA-R6-A6XG	0	0	86		TCGA-DQ-7588	0	0	32		TCGA-3B-A9HI	0	0	16		TCGA-XQ-A8TB	0	0	5
TCGA-R6-A6Y0	0	0	86		TCGA-HD-A6HZ	0	0	32		TCGA-3R-A8YX	0	0	16		TCGA-DX-A48U	0	0	5
TCGA-CN-5363	0	0	86		TCGA-QK-A64Z	0	0	32		TCGA-DX-A3LY	0	0	16		TCGA-DX-AB30	0	0	5
TCGA-CN-6988	0	0	86		TCGA-TN-A7HI	0	0	32		TCGA-DX-A3UC	0	0	16		TCGA-QQ-A8VD	0	0	5
TCGA-ED-A7PZ	0	0	86		TCGA-UF-A7JH	0	0	32		TCGA-DX-A48P	0	0	16		TCGA-RN-A68Q	0	0	5
TCGA-HP-A5N0	0	0	86		TCGA-A3-3308	1	1	32		TCGA-DX-A8BN	0	0	16		TCGA-ER-A196	0	0	5
TCGA-50-5072	0	0	86		TCGA-A3-3319	0	0	32		TCGA-DX-A8BZ	0	0	16		TCGA-2G-AAF8	0	0	5
TCGA-O1-A52J	0	0	86		TCGA-AK-3455	1	1	32		TCGA-FX-A3NK	0	0	16		TCGA-2G-AAHG	0	0	5
TCGA-21-1075	0	0	86		TCGA-B0-5106	0	0	32		TCGA-HB-A5W3	0	0	16		TCGA-2G-AAHN	0	0	5
TCGA-22-4609	0	0	86		TCGA-B8-5162	0	0	32		TCGA-MB-A5Y9	0	0	16		TCGA-2X-A9D5	0	0	5
TCGA-39-5024	0	0	86		TCGA-CJ-4634	0	0	32		TCGA-MO-A47R	0	0	16		TCGA-SN-A6IS	0	0	5
TCGA-43-6770	0	0	86		TCGA-CJ-5677	0	0	32		TCGA-2G-AAKL	0	0	16		TCGA-WZ-A7V3	0	0	5
TCGA-58-8386	0	0	86		TCGA-CZ-4866	0	0	32		TCGA-ZB-A96L	0	0	16		TCGA-XE-AANV	0	0	5
TCGA-66-2783	0	0	86		TCGA-2Z-A9J3	0	0	32		TCGA-BJ-A18Z	0	0	16		TCGA-XE-AAOB	0	0	5
TCGA-77-A5GH	0	0	86		TCGA-A4-7585	0	0	32		TCGA-EM-A22O	0	0	16		TCGA-XE-AAOL	0	0	5
TCGA-FP-A9TM	0	0	86		TCGA-GL-A59R	0	0	32		TCGA-EM-A3O3	0	0	16		TCGA-XY-A8S3	0	0	5
TCGA-VQ-A922	0	0	86		TCGA-SX-A71U	0	0	32		TCGA-N5-A4RV	0	0	16		TCGA-YU-A90P	0	0	5
TCGA-AJ-A2QM	0	0	86		TCGA-5R-AAAM	0	0	32		TCGA-N6-A4V9	0	0	16		TCGA-YU-AA4L	0	0	5
TCGA-E7-A5KE	0	0	85		TCGA-BC-A10R	0	0	32		TCGA-N8-A56S	0	0	16		TCGA-ZM-AA06	0	0	5
TCGA-XF-AAN7	0	0	85		TCGA-DD-A4NS	0	0	32		TCGA-N9-A4Q4	0	0	16		TCGA-ZM-AA0B	0	0	5
TCGA-C8-A274	1	1	85		TCGA-DD-AAEK	0	0	32		TCGA-A5-A0GX	0	0	16		TCGA-2G-AALY	0	0	5
TCGA-AG-4021	0	0	85		TCGA-K7-A6G5	1	1	32		TCGA-B5-A11F	0	0	16		TCGA-3S-AAYX	0	0	5
TCGA-5M-AAT4	0	0	85		TCGA-MI-A75C	0	0	32		TCGA-BG-A0MA	0	0	16		TCGA-4X-A9FC	0	0	5
TCGA-IG-A3Y9	0	0	85		TCGA-RC-A7S9	0	0	32		TCGA-BG-A0VT	0	0	16		TCGA-5U-AB0F	0	0	5
TCGA-BB-A5HY	0	0	85		TCGA-UB-AA0U	0	0	32		TCGA-BG-A18C	0	0	16		TCGA-X7-A8M6	0	0	5
TCGA-CV-6948	0	0	85		TCGA-38-6178	0	0	32		TCGA-D1-A0ZP	0	0	16		TCGA-XM-A8RE	0	0	5
TCGA-DD-AADG	0	0	85		TCGA-50-5044	1	1	32		TCGA-D1-A0ZU	0	0	16		TCGA-XU-AAY1	0	0	5
TCGA-67-6217	0	0	85		TCGA-50-5944	0	0	32		TCGA-D1-A0ZV	0	0	16		TCGA-ZB-A963	0	0	5
TCGA-46-6025	0	0	85		TCGA-62-A46V	0	0	32		TCGA-D1-A16D	0	0	16		TCGA-ZB-A96A	0	0	5
TCGA-60-2695	1	1	85		TCGA-64-1681	0	0	32		TCGA-DI-A1NN	0	0	16		TCGA-ZC-AAAH	0	0	5
TCGA-77-7139	0	0	85		TCGA-64-5774	0	0	32		TCGA-FI-A2D2	0	0	16		TCGA-BJ-A0ZG	0	0	5
TCGA-85-8351	0	0	85		TCGA-75-6207	0	0	32		TCGA-PG-A7D5	0	0	16		TCGA-BJ-A28V	0	0	5
TCGA-BH-A0BZ	0	0	84		TCGA-13-1501	0	0	32		TCGA-VD-A8KI	0	0	16		TCGA-BJ-A3PR	0	0	5
TCGA-C5-A2LX	0	0	84		TCGA-20-1687	0	0	32		TCGA-OR-A5J9	0	0	15		TCGA-BJ-A45D	0	0	5
TCGA-C5-A7UE	0	0	84		TCGA-24-1424	0	0	32		TCGA-OR-A5JF	0	0	15		TCGA-DE-A4M8	0	0	5
TCGA-EK-A2RK	0	0	84		TCGA-25-1319	0	0	32		TCGA-OR-A5JW	0	0	15		TCGA-DJ-A13S	0	0	5
TCGA-AA-3956	0	0	84		TCGA-25-2397	0	0	32		TCGA-OR-A5K8	0	0	15		TCGA-DJ-A13U	0	0	5
TCGA-DM-A0X9	0	0	84		TCGA-61-2094	0	0	32		TCGA-OR-A5LL	0	0	15		TCGA-DJ-A1QI	0	0	5
TCGA-Z6-A8JD	0	0	84		TCGA-2J-AAB1	0	0	32		TCGA-DK-A3WX	0	0	15		TCGA-DJ-A2PP	0	0	5
TCGA-55-8299	0	0	84		TCGA-YJ-A8SW	0	0	32		TCGA-CS-6667	0	0	15		TCGA-DJ-A2PV	0	0	5
TCGA-69-8253	0	0	84		TCGA-HB-A2OT	0	0	32		TCGA-DB-A4XE	0	0	15		TCGA-DJ-A3VB	0	0	5
TCGA-86-7954	0	0	84		TCGA-HB-A43Z	0	0	32		TCGA-DB-A75K	0	0	15		TCGA-DJ-A3VM	0	0	5
TCGA-60-2713	0	0	84		TCGA-X6-A8C4	0	0	32		TCGA-DU-5847	0	0	15		TCGA-DJ-A4V2	0	0	5
TCGA-23-1116	0	0	84		TCGA-B7-A5TN	0	0	32		TCGA-DU-7018	0	0	15		TCGA-E3-A3E3	0	0	5
TCGA-24-1422	0	0	84		TCGA-VQ-A8PF	0	0	32		TCGA-DU-A6S7	0	0	15		TCGA-E8-A3X7	0	0	5
TCGA-29-1784	0	0	84		TCGA-VQ-A91A	0	0	32		TCGA-DU-A76K	0	0	15		TCGA-E8-A415	0	0	5
TCGA-13-0888	0	0	84		TCGA-VQ-A94T	0	0	32		TCGA-DU-A7TB	0	0	15		TCGA-E8-A433	0	0	5
TCGA-VQ-AA64	0	0	84		TCGA-VQ-AA69	0	0	32		TCGA-E1-5304	0	0	15		TCGA-EL-A3GX	0	0	5
TCGA-AX-A05Y	0	0	84		TCGA-ND-A4WA	0	0	32		TCGA-E1-5322	1	1	15		TCGA-EL-A3T0	0	0	5
TCGA-E5-A2PC	0	0	83		TCGA-AW-A1PO	0	0	32		TCGA-EZ-7264	0	0	15		TCGA-EL-A4JW	0	0	5
TCGA-E7-A97P	0	0	83		TCGA-D1-A17L	0	0	32		TCGA-FG-7637	0	0	15		TCGA-EL-A4KI	0	0	5
TCGA-A7-A0DA	0	0	83		TCGA-FI-A2EX	0	0	32		TCGA-FG-A60J	0	0	15		TCGA-EM-A1CU	0	0	5
TCGA-VS-A9UD	0	0	83		TCGA-OR-A5LO	0	0	31		TCGA-FG-A60K	0	0	15		TCGA-EM-A1YC	0	0	5
TCGA-A6-4105	0	0	83		TCGA-XF-A8HI	0	0	31		TCGA-HT-7677	0	0	15		TCGA-EM-A22Q	0	0	5
TCGA-AA-3854	0	0	83		TCGA-DU-6403	0	0	31		TCGA-HT-7686	0	0	15		TCGA-EM-A2CK	0	0	5
TCGA-CM-5864	0	0	83		TCGA-A2-A0CW	0	0	31		TCGA-HT-7902	0	0	15		TCGA-EM-A2CN	0	0	5
TCGA-FA-A6HN	0	0	83		TCGA-A7-A26G	0	0	31		TCGA-HT-8013	0	0	15		TCGA-EM-A3AP	0	0	5
TCGA-JY-A93E	0	0	83		TCGA-A8-A07E	0	0	31		TCGA-HT-A5R7	0	0	15		TCGA-EM-A4FN	0	0	5
TCGA-LN-A49M	0	0	83		TCGA-AO-A03V	0	0	31		TCGA-P5-A5EU	0	0	15		TCGA-ET-A25O	0	0	5
TCGA-BA-5556	0	0	83		TCGA-AO-A1KR	0	0	31		TCGA-QH-A6X8	0	0	15		TCGA-ET-A39N	0	0	5
TCGA-QK-A8Z7	0	0	83		TCGA-AR-A0TY	0	0	31		TCGA-S9-A6WL	0	0	15		TCGA-ET-A3BV	1	1	5
TCGA-RS-A6TO	0	0	83		TCGA-BH-A0HK	0	0	31		TCGA-S9-A6WN	0	0	15		TCGA-ET-A3DV	0	0	5
TCGA-UF-A7JO	0	0	83		TCGA-BH-A1F0	0	0	31		TCGA-S9-A6WO	0	0	15		TCGA-ET-A4KQ	0	0	5
TCGA-05-5423	0	0	83		TCGA-C8-A135	0	0	31		TCGA-S9-A7QX	0	0	15		TCGA-FE-A232	0	0	5
TCGA-53-7813	0	0	83		TCGA-D8-A1JJ	0	0	31		TCGA-TQ-A7RQ	0	0	15		TCGA-FY-A3BL	0	0	5
TCGA-18-3415	0	0	83		TCGA-E2-A1IH	0	0	31		TCGA-A1-A0SJ	0	0	15		TCGA-FY-A3NP	0	0	5
TCGA-56-5898	0	0	83		TCGA-PL-A8LZ	0	0	31		TCGA-A2-A04Y	0	0	15		TCGA-FY-A3R7	0	0	5
TCGA-56-A5DS	0	0	83		TCGA-C5-A8XI	0	0	31		TCGA-A8-A099	0	0	15		TCGA-FY-A40K	0	0	5
TCGA-60-2709	0	0	83		TCGA-HM-A3JJ	0	0	31		TCGA-A8-A09T	0	0	15		TCGA-H2-A2K9	0	0	5
TCGA-85-8354	0	0	83		TCGA-JW-A5VI	0	0	31		TCGA-AN-A03Y	0	0	15		TCGA-J8-A3O0	0	0	5
TCGA-EB-A44O	1	1	83		TCGA-VS-A954	0	0	31		TCGA-AN-A0XL	0	0	15		TCGA-KS-A41F	0	0	5
TCGA-OR-A5LB	0	0	82		TCGA-A6-5662	0	0	31		TCGA-AN-A0XR	0	0	15		TCGA-KS-A4I3	0	0	5
TCGA-CU-A3KJ	0	0	82		TCGA-A6-5667	0	0	31		TCGA-AO-A03P	0	0	15		TCGA-KS-A4I9	0	0	5
TCGA-DK-A6B1	0	0	82		TCGA-AZ-4308	0	0	31		TCGA-AR-A0TQ	0	0	15		TCGA-V4-A9EE	0	0	5
TCGA-DK-AA74	0	0	82		TCGA-CA-5796	0	0	31		TCGA-AR-A0TR	0	0	15		TCGA-WC-A87U	0	0	5
TCGA-B6-A0RE	0	0	82		TCGA-CM-6164	0	0	31		TCGA-AR-A1AV	0	0	15		TCGA-VD-A8KO	0	0	5
TCGA-VS-A9V1	0	0	82		TCGA-DM-A0XF	1	1	31		TCGA-AR-A24U	0	0	15		TCGA-VD-A8KK	0	0	5
TCGA-5M-AATE	0	0	82		TCGA-F4-6855	0	0	31		TCGA-AR-A254	0	0	15		TCGA-VD-A8K9	0	0	5
TCGA-DM-A285	0	0	82		TCGA-IG-A6QS	0	0	31		TCGA-AR-A5QN	0	0	15		TCGA-WC-A885	0	0	5
TCGA-LN-A7HY	0	0	82		TCGA-L5-A4OM	0	0	31		TCGA-B6-A0IP	0	0	15		TCGA-V4-A9EO	0	0	5
TCGA-VR-AA7B	0	0	82		TCGA-R6-A6DQ	0	0	31		TCGA-B6-A0RM	0	0	15		TCGA-VD-AA8S	0	0	5
TCGA-CN-4730	0	0	82		TCGA-26-5134	1	1	31		TCGA-B6-A0RP	0	0	15		TCGA-YZ-A980	0	0	5
TCGA-CR-7399	0	0	82		TCGA-02-0047	0	0	31		TCGA-BH-A0B3	0	0	15		TCGA-WC-AA9A	0	0	5
TCGA-CV-5430	0	0	82		TCGA-CN-4736	0	0	31		TCGA-BH-A0BC	0	0	15		TCGA-VD-A8KN	0	0	5
TCGA-05-4415	0	0	82		TCGA-CQ-6219	0	0	31		TCGA-BH-A0BJ	0	0	15		TCGA-V4-A9EY	0	0	5
TCGA-75-5146	0	0	82		TCGA-CR-7365	0	0	31		TCGA-BH-A0BM	0	0	15		TCGA-OR-A5JI	0	0	4
TCGA-21-1076	0	0	82		TCGA-CV-5443	0	0	31		TCGA-BH-A0E2	0	0	15		TCGA-OR-A5LA	0	0	4
TCGA-58-A46N	0	0	82		TCGA-CV-A460	0	0	31		TCGA-BH-A0E9	0	0	15		TCGA-OR-A5LR	0	0	4
TCGA-66-2727	0	0	82		TCGA-D6-6824	0	0	31		TCGA-BH-A0EA	0	0	15		TCGA-DB-5278	0	0	4
TCGA-R5-A7ZE	1	1	82		TCGA-F7-A620	0	0	31		TCGA-BH-A0HB	0	0	15		TCGA-E1-A7YW	0	0	4
TCGA-AJ-A8CV	0	0	82		TCGA-HD-8634	0	0	31		TCGA-BH-A1FH	0	0	15		TCGA-HT-7468	0	0	4
TCGA-CU-A0YN	0	0	81		TCGA-A3-3313	0	0	31		TCGA-C8-A12M	0	0	15		TCGA-HT-7476	0	0	4
TCGA-FT-A61P	0	0	81		TCGA-A3-3382	0	0	31		TCGA-D8-A13Z	0	0	15		TCGA-HT-7691	0	0	4
TCGA-A7-A5ZV	0	0	81		TCGA-B0-4815	0	0	31		TCGA-D8-A1JT	0	0	15		TCGA-HT-7880	0	0	4
TCGA-B6-A0IJ	0	0	81		TCGA-B0-4816	0	0	31		TCGA-D8-A3Z6	0	0	15		TCGA-HT-7881	0	0	4
TCGA-D8-A147	0	0	81		TCGA-B0-5085	0	0	31		TCGA-E2-A14O	0	0	15		TCGA-HT-8108	0	0	4
TCGA-E2-A1LG	0	0	81		TCGA-B0-5690	1	1	31		TCGA-E2-A14Q	0	0	15		TCGA-P5-A5EW	0	0	4
TCGA-4J-AA1J	0	0	81		TCGA-B0-5697	0	0	31		TCGA-E2-A14Y	0	0	15		TCGA-P5-A781	0	0	4
TCGA-DG-A2KL	0	0	81		TCGA-B0-5698	0	0	31		TCGA-E2-A15D	0	0	15		TCGA-R8-A6MK	0	0	4
TCGA-AA-3852	0	0	81		TCGA-B0-5709	0	0	31		TCGA-E9-A1R0	0	0	15		TCGA-RY-A83X	0	0	4
TCGA-RU-A8FL	0	0	81		TCGA-2Z-A9J1	0	0	31		TCGA-E9-A22H	0	0	15		TCGA-S9-A6U1	0	0	4
TCGA-L5-A4OR	0	0	81		TCGA-2Z-A9JE	0	0	31		TCGA-EW-A1PA	0	0	15		TCGA-VM-A8C9	0	0	4
TCGA-L5-A8NR	0	0	81		TCGA-5P-A9JW	0	0	31		TCGA-GM-A2DM	0	0	15		TCGA-WY-A85B	0	0	4
TCGA-V5-A7RB	0	0	81		TCGA-A4-A5Y0	0	0	31		TCGA-OL-A66K	0	0	15		TCGA-AC-A2FF	0	0	4
TCGA-CV-5442	0	0	81		TCGA-BQ-7044	0	0	31		TCGA-S3-A6ZH	0	0	15		TCGA-AC-A3YI	0	0	4
TCGA-CV-5970	0	0	81		TCGA-DW-7839	0	0	31		TCGA-C5-A907	0	0	15		TCGA-B6-A401	0	0	4
TCGA-CV-7250	0	0	81		TCGA-G7-6797	0	0	31		TCGA-DS-A3LQ	0	0	15		TCGA-BH-A0C3	0	0	4
TCGA-D6-A6ES	0	0	81		TCGA-HE-A5NI	0	0	31		TCGA-EK-A2H1	0	0	15		TCGA-BH-A0HN	0	0	4
TCGA-T2-A6WX	0	0	81		TCGA-Q2-A5QZ	0	0	31		TCGA-EX-A69M	0	0	15		TCGA-BH-A0HO	0	0	4
TCGA-44-6774	0	0	81		TCGA-SX-A71V	0	0	31		TCGA-Q1-A73R	0	0	15		TCGA-BH-A6R9	0	0	4
TCGA-49-6761	0	0	81		TCGA-CC-5260	0	0	31		TCGA-UC-A7PD	0	0	15		TCGA-E9-A6HE	0	0	4
TCGA-78-7154	0	0	81		TCGA-DD-AAC9	0	0	31		TCGA-GS-A9U4	0	0	15		TCGA-GM-A2DC	0	0	4
TCGA-91-6828	0	0	81		TCGA-DD-AACY	0	0	31		TCGA-28-5204	0	0	15		TCGA-GM-A4E0	0	0	4
TCGA-L4-A4E5	0	0	81		TCGA-DD-AADJ	0	0	31		TCGA-28-5215	0	0	15		TCGA-OL-A6VR	0	0	4
TCGA-34-5234	0	0	81		TCGA-DD-AAE6	0	0	31		TCGA-41-2571	0	0	15		TCGA-S3-AA12	0	0	4
TCGA-56-8201	0	0	81		TCGA-ED-A8O5	0	0	31		TCGA-CR-7372	0	0	15		TCGA-W8-A86G	0	0	4
TCGA-77-8156	0	0	81		TCGA-G3-AAUZ	0	0	31		TCGA-CR-7385	0	0	15		TCGA-Q1-A73S	0	0	4
TCGA-85-7696	0	0	81		TCGA-G3-AAV1	0	0	31		TCGA-F7-A622	0	0	15		TCGA-BA-A6DB	0	0	4
TCGA-61-2113	0	0	81		TCGA-RC-A6M3	0	0	31		TCGA-H7-A6C4	0	0	15		TCGA-KL-8334	0	0	4
TCGA-GC-A3RB	0	0	80		TCGA-UB-A7MA	0	0	31		TCGA-MZ-A6I9	0	0	15		TCGA-KM-8439	0	0	4
TCGA-AR-A256	0	0	80		TCGA-44-6775	0	0	31		TCGA-KL-8329	0	0	15		TCGA-KN-8433	0	0	4
TCGA-E2-A1IN	0	0	80		TCGA-50-5942	1	1	31		TCGA-KM-8476	0	0	15		TCGA-KN-8435	0	0	4
TCGA-EI-7002	0	0	80		TCGA-55-8621	0	0	31		TCGA-KN-8426	0	0	15		TCGA-KO-8405	0	0	4
TCGA-AA-3819	0	0	80		TCGA-86-8055	0	0	31		TCGA-B0-5113	0	0	15		TCGA-KO-8411	0	0	4
TCGA-F4-6461	0	0	80		TCGA-91-6847	0	0	31		TCGA-B0-5119	0	0	15		TCGA-B0-5117	0	0	4
TCGA-VR-A8EQ	0	0	80		TCGA-MP-A4SW	0	0	31		TCGA-B4-5834	0	0	15		TCGA-B8-5546	0	0	4
TCGA-44-3396	0	0	80		TCGA-MP-A5C7	0	0	31		TCGA-B8-4154	0	0	15		TCGA-BP-4970	0	0	4
TCGA-55-7227	0	0	80		TCGA-77-8131	0	0	31		TCGA-BP-4962	0	0	15		TCGA-B3-3926	0	0	4
TCGA-75-7031	0	0	80		TCGA-77-A5G7	0	0	31		TCGA-BP-5000	0	0	15		TCGA-B9-A5W7	0	0	4
TCGA-22-5477	0	0	80		TCGA-22-0944	0	0	31		TCGA-BP-5169	1	1	15		TCGA-G3-A3CI	0	0	4
TCGA-4Z-AA7Y	0	0	79		TCGA-04-1648	0	0	31		TCGA-CJ-4908	0	0	15		TCGA-38-A44F	0	0	4
TCGA-FD-A5C1	0	0	79		TCGA-13-1499	0	0	31		TCGA-CW-5591	1	1	15		TCGA-55-8513	0	0	4
TCGA-A2-A3Y0	0	0	79		TCGA-24-1616	0	0	31		TCGA-CZ-5986	0	0	15		TCGA-3U-A98H	1	1	4
TCGA-EK-A2PL	0	0	79		TCGA-24-1847	0	0	31		TCGA-G7-6792	0	0	15		TCGA-61-2088	0	0	4
TCGA-MA-AA3Z	0	0	79		TCGA-24-2293	1	1	31		TCGA-G7-A4TM	0	0	15		TCGA-2J-AABV	0	0	4
TCGA-Q1-A6DT	0	0	79		TCGA-29-2427	0	0	31		TCGA-HE-7129	0	0	15		TCGA-Z5-AAPL	0	0	4
TCGA-AA-A02E	0	0	79		TCGA-61-2008	0	0	31		TCGA-KV-A6GE	0	0	15		TCGA-QR-A6GS	0	0	4
TCGA-AY-4070	0	0	79		TCGA-HV-A7OP	0	0	31		TCGA-Y8-A8S0	0	0	15		TCGA-QR-A6H0	0	0	4
TCGA-CA-6716	0	0	79		TCGA-EJ-5495	0	0	31		TCGA-DD-A4NB	0	0	15		TCGA-QR-A70J	0	0	4
TCGA-T9-A92H	0	0	79		TCGA-DX-A6Z2	0	0	31		TCGA-DD-A4NP	0	0	15		TCGA-QR-A70X	0	0	4
TCGA-L5-A43E	0	0	79		TCGA-DX-A7EU	0	0	31		TCGA-DD-AA3A	0	0	15		TCGA-QR-A7IP	0	0	4
TCGA-BA-4074	0	0	79		TCGA-DX-A8BH	0	0	31		TCGA-DD-AAEI	0	0	15		TCGA-QT-A5XL	0	0	4
TCGA-DQ-5625	0	0	79		TCGA-DX-A8BJ	0	0	31		TCGA-DD-AAVS	0	0	15		TCGA-RM-A68W	0	0	4
TCGA-CC-A7IE	1	1	79		TCGA-DX-AB2Z	0	0	31		TCGA-KR-A7K8	0	0	15		TCGA-RW-A67W	0	0	4
TCGA-DD-A4NF	0	0	79		TCGA-IS-A3K7	0	0	31		TCGA-MR-A8JO	0	0	15		TCGA-RW-A688	0	0	4
TCGA-22-5471	0	0	79		TCGA-RD-A7BW	0	0	31		TCGA-50-5068	0	0	15		TCGA-RW-A7CZ	0	0	4
TCGA-NC-A5HM	1	1	79		TCGA-VQ-A91N	0	0	31		TCGA-50-6597	0	0	15		TCGA-S7-A7WL	0	0	4
TCGA-13-1477	0	0	79		TCGA-ZC-AAA7	0	0	31		TCGA-97-A4M2	0	0	15		TCGA-S7-A7WV	0	0	4
TCGA-EB-A44N	0	0	79		TCGA-AX-A0IW	0	0	31		TCGA-97-A4M6	1	1	15		TCGA-S7-A7WW	0	0	4
TCGA-SW-A7EB	0	0	79		TCGA-BK-A26L	0	0	31		TCGA-85-6175	0	0	15		TCGA-SP-A6QH	0	0	4
TCGA-VQ-A8PC	0	0	79		TCGA-D1-A1O0	0	0	31		TCGA-3H-AB3M	0	0	15		TCGA-SP-A6QK	0	0	4
TCGA-B6-A0IK	0	0	78		TCGA-PG-A5BC	0	0	31		TCGA-LK-A4O0	0	0	15		TCGA-SQ-A6I4	0	0	4
TCGA-C8-A12T	0	0	78		TCGA-DK-A3IM	0	0	30		TCGA-MQ-A6BL	0	0	15		TCGA-SR-A6MQ	0	0	4
TCGA-E2-A159	0	0	78		TCGA-FD-A3B4	0	0	30		TCGA-25-2399	0	0	15		TCGA-SR-A6N0	0	0	4
TCGA-DY-A1DG	0	0	78		TCGA-FD-A3B7	0	0	30		TCGA-25-2409	0	0	15		TCGA-TT-A6YP	0	0	4
TCGA-AA-3818	0	0	78		TCGA-FJ-A3Z9	0	0	30		TCGA-29-1697	0	0	15		TCGA-W2-A7HB	0	0	4
TCGA-D5-6531	0	0	78		TCGA-GD-A3OS	0	0	30		TCGA-59-2355	0	0	15		TCGA-WB-A80M	0	0	4
TCGA-L5-A4OJ	0	0	78		TCGA-ZF-AA5H	0	0	30		TCGA-13-0886	0	0	15		TCGA-WB-A80N	0	0	4
TCGA-CN-4740	0	0	78		TCGA-DU-8167	0	0	30		TCGA-13-0765	0	0	15		TCGA-WB-A80O	0	0	4
TCGA-CQ-5333	0	0	78		TCGA-DU-A6S8	0	0	30		TCGA-2J-AAB4	0	0	15		TCGA-WB-A814	0	0	4
TCGA-CV-A45Q	0	0	78		TCGA-FG-A6J3	1	1	30		TCGA-2J-AABI	0	0	15		TCGA-WB-A81V	0	0	4
TCGA-CC-A9FW	0	0	78		TCGA-A1-A0SK	0	0	30		TCGA-FB-AAQ2	0	0	15		TCGA-XG-A823	0	0	4
TCGA-35-4123	0	0	78		TCGA-A2-A25E	0	0	30		TCGA-S4-A8RM	0	0	15		TCGA-CH-5746	0	0	4
TCGA-78-7145	0	0	78		TCGA-A2-A4S1	0	0	30		TCGA-XD-AAUI	0	0	15		TCGA-EJ-7325	0	0	4
TCGA-MP-A4T7	0	0	78		TCGA-A8-A07U	0	0	30		TCGA-YH-A8SY	0	0	15		TCGA-EJ-A8FP	0	0	4
TCGA-BT-A3PH	0	0	77		TCGA-A8-A08B	0	0	30		TCGA-RT-A6YA	0	0	15		TCGA-FC-A8O0	0	0	4
TCGA-FD-A3NA	0	0	77		TCGA-AO-A0JE	0	0	30		TCGA-WB-A821	0	0	15		TCGA-G9-6353	0	0	4
TCGA-XF-A8HF	0	0	77		TCGA-B6-A0I1	0	0	30		TCGA-CH-5745	0	0	15		TCGA-G9-6385	0	0	4
TCGA-ZF-A9R2	0	0	77		TCGA-BH-A0AV	0	0	30		TCGA-CH-5766	0	0	15		TCGA-J4-A6M7	1	1	4
TCGA-ZF-A9RD	1	1	77		TCGA-BH-A0AZ	0	0	30		TCGA-EJ-7786	0	0	15		TCGA-KC-A7FE	0	0	4
TCGA-LP-A7HU	0	0	77		TCGA-BH-A0B1	0	0	30		TCGA-EJ-7797	0	0	15		TCGA-M7-A720	0	0	4
TCGA-AA-3506	0	0	77		TCGA-C8-A275	0	0	30		TCGA-EJ-8469	0	0	15		TCGA-SU-A7E7	0	0	4
TCGA-AA-3848	0	0	77		TCGA-E2-A14V	1	1	30		TCGA-EJ-A8FS	0	0	15		TCGA-V1-A9OF	0	0	4
TCGA-G4-6299	0	0	77		TCGA-E9-A295	0	0	30		TCGA-G9-6354	0	0	15		TCGA-XJ-A9DI	0	0	4
TCGA-NH-A50V	0	0	77		TCGA-OL-A97C	0	0	30		TCGA-G9-6362	0	0	15		TCGA-YL-A8SF	0	0	4
TCGA-CV-7440	0	0	77		TCGA-C5-A2LY	0	0	30		TCGA-G9-6363	0	0	15		TCGA-DX-AB2L	0	0	4
TCGA-DD-A3A8	0	0	77		TCGA-C5-A7CH	0	0	30		TCGA-G9-6378	0	0	15		TCGA-SI-AA8C	0	0	4
TCGA-RC-A6M6	0	0	77		TCGA-C5-A7X8	0	0	30		TCGA-HC-7077	0	0	15		TCGA-X6-A8C7	0	0	4
TCGA-55-1594	0	0	77		TCGA-DS-A5RQ	0	0	30		TCGA-HC-A76X	0	0	15		TCGA-EB-A4OZ	0	0	4
TCGA-78-7149	0	0	77		TCGA-EA-A3QE	0	0	30		TCGA-HC-A8D0	0	0	15		TCGA-2G-AAF4	0	0	4
TCGA-63-A5MR	0	0	77		TCGA-FU-A2QG	0	0	30		TCGA-J4-A67M	0	0	15		TCGA-2G-AAFN	0	0	4
TCGA-85-7844	0	0	77		TCGA-FU-A3WB	0	0	30		TCGA-KC-A7FD	0	0	15		TCGA-2G-AAFY	0	0	4
TCGA-4Z-AA81	0	0	76		TCGA-MA-AA43	0	0	30		TCGA-KK-A6E2	0	0	15		TCGA-2G-AAG6	0	0	4
TCGA-VS-A8EL	0	0	76		TCGA-MU-A8JM	0	0	30		TCGA-KK-A6E7	0	0	15		TCGA-2G-AAGC	0	0	4
TCGA-VS-A9U7	0	0	76		TCGA-ZX-AA5X	0	0	30		TCGA-KK-A7AW	0	0	15		TCGA-2G-AAGZ	0	0	4
TCGA-AA-3955	0	0	76		TCGA-3X-AAVC	0	0	30		TCGA-KK-A7B0	0	0	15		TCGA-2G-AAH0	0	0	4
TCGA-D5-6924	0	0	76		TCGA-AG-3909	0	0	30		TCGA-KK-A7B3	0	0	15		TCGA-4K-AAAL	0	0	4
TCGA-SS-A7HO	0	0	76		TCGA-DC-6154	0	0	30		TCGA-KK-A8IF	0	0	15		TCGA-VF-A8AE	0	0	4
TCGA-CV-A463	0	0	76		TCGA-AZ-4681	0	0	30		TCGA-VN-A88O	0	0	15		TCGA-YU-A912	0	0	4
TCGA-IQ-A61E	0	0	76		TCGA-CM-6679	0	0	30		TCGA-VP-A872	0	0	15		TCGA-2G-AALO	0	0	4
TCGA-QK-A6II	0	0	76		TCGA-D5-6537	0	0	30		TCGA-VP-A87E	0	0	15		TCGA-2G-AAM2	0	0	4
TCGA-80-5611	0	0	76		TCGA-D5-6926	0	0	30		TCGA-ZG-A9MC	0	0	15		TCGA-2G-AALF	0	0	4
TCGA-83-5908	0	0	76		TCGA-LN-A49X	0	0	30		TCGA-DX-A48L	0	0	15		TCGA-2G-AALN	0	0	4
TCGA-86-8054	0	0	76		TCGA-06-5856	0	0	30		TCGA-DX-A6BE	0	0	15		TCGA-3G-AB0O	0	0	4
TCGA-95-7948	0	0	76		TCGA-28-5208	1	1	30		TCGA-DX-A7EQ	0	0	15		TCGA-4V-A9QS	0	0	4
TCGA-97-8176	0	0	76		TCGA-16-0846	0	0	30		TCGA-DX-AB2H	0	0	15		TCGA-4V-A9QX	0	0	4
TCGA-43-7657	0	0	76		TCGA-CN-A6V6	0	0	30		TCGA-IS-A3K6	0	0	15		TCGA-XH-A853	0	0	4
TCGA-58-8387	0	0	76		TCGA-CV-5976	0	0	30		TCGA-IW-A3M6	0	0	15		TCGA-XM-A8RD	0	0	4
TCGA-66-2755	0	0	76		TCGA-CV-7247	0	0	30		TCGA-JV-A75J	0	0	15		TCGA-XU-A92Y	0	0	4
TCGA-92-7341	0	0	76		TCGA-MT-A51W	0	0	30		TCGA-EB-A5SF	0	0	15		TCGA-XU-A932	0	0	4
TCGA-94-A5I6	0	0	76		TCGA-UF-A7JD	0	0	30		TCGA-VF-A8A8	0	0	15		TCGA-ZB-A964	0	0	4
TCGA-98-A539	0	0	76		TCGA-A3-3320	0	0	30		TCGA-X7-A8M5	0	0	15		TCGA-ZB-A96B	0	0	4
TCGA-24-2289	0	0	76		TCGA-B8-4620	1	1	30		TCGA-ZB-A96M	0	0	15		TCGA-ZB-A96G	0	0	4
TCGA-FD-A6TE	0	0	75		TCGA-BP-4770	0	0	30		TCGA-BJ-A0Z0	0	0	15		TCGA-ZB-A96R	0	0	4
TCGA-A2-A0CL	0	0	75		TCGA-CJ-4639	1	1	30		TCGA-EM-A3SX	0	0	15		TCGA-ZC-AAAA	0	0	4
TCGA-AR-A24Q	0	0	75		TCGA-B1-A655	0	0	30		TCGA-IM-A41Y	0	0	15		TCGA-BJ-A3F0	0	0	4
TCGA-AA-3875	0	0	75		TCGA-BQ-7048	0	0	30		TCGA-N7-A4Y8	0	0	15		TCGA-BJ-A45F	0	0	4
TCGA-LN-A49L	0	0	75		TCGA-DZ-6133	0	0	30		TCGA-NA-A4QX	0	0	15		TCGA-BJ-A45K	0	0	4
TCGA-F7-A50J	0	0	75		TCGA-G7-7502	0	0	30		TCGA-A5-A0R8	0	0	15		TCGA-CE-A13K	0	0	4
TCGA-CC-5258	1	1	75		TCGA-GL-6846	0	0	30		TCGA-A5-A1OJ	0	0	15		TCGA-CE-A485	0	0	4
TCGA-RC-A7SK	0	0	75		TCGA-GL-A9DD	0	0	30		TCGA-AP-A0LH	0	0	15		TCGA-DE-A0Y3	0	0	4
TCGA-ZP-A9D1	0	0	75		TCGA-HE-A5NK	0	0	30		TCGA-B5-A11Q	0	0	15		TCGA-DE-A2OL	0	0	4
TCGA-44-2662	0	0	75		TCGA-KV-A6GD	0	0	30		TCGA-BS-A0U9	0	0	15		TCGA-DE-A3KN	0	0	4
TCGA-44-5643	0	0	75		TCGA-PJ-A5Z8	0	0	30		TCGA-D1-A15Z	0	0	15		TCGA-DE-A69J	0	0	4
TCGA-62-A46S	0	0	75		TCGA-UZ-A9PK	0	0	30		TCGA-EY-A210	0	0	15		TCGA-DE-A7U5	0	0	4
TCGA-78-7166	0	0	75		TCGA-UZ-A9PL	0	0	30		TCGA-EY-A2OQ	0	0	15		TCGA-DJ-A13R	0	0	4
TCGA-78-7537	0	0	75		TCGA-UZ-A9PN	0	0	30		TCGA-KP-A3W1	0	0	15		TCGA-DJ-A1QL	0	0	4
TCGA-56-1622	0	0	75		TCGA-BC-A5W4	0	0	30		TCGA-PG-A916	0	0	15		TCGA-DJ-A2PN	0	0	4
TCGA-98-8023	0	0	75		TCGA-DD-AACS	0	0	30		TCGA-OR-A5JS	0	0	14		TCGA-DJ-A2PO	0	0	4
TCGA-98-A53B	0	0	75		TCGA-DD-AAE4	0	0	30		TCGA-OR-A5KX	0	0	14		TCGA-DJ-A2PR	0	0	4
TCGA-13-0887	0	0	75		TCGA-ED-A8O6	0	0	30		TCGA-XF-AAMW	0	0	14		TCGA-DJ-A2PU	0	0	4
TCGA-AX-A1CA	0	0	75		TCGA-FV-A3I0	0	0	30		TCGA-CS-5393	0	0	14		TCGA-DJ-A3UP	0	0	4
TCGA-E7-A3Y1	0	0	74		TCGA-FV-A3R3	0	0	30		TCGA-CS-5396	0	0	14		TCGA-DJ-A3V8	0	0	4
TCGA-YC-A9TC	0	0	74		TCGA-G3-AAV6	0	0	30		TCGA-DB-A75M	0	0	14		TCGA-DJ-A3VD	0	0	4
TCGA-A7-A56D	0	0	74		TCGA-RC-A7SF	0	0	30		TCGA-DU-5854	0	0	14		TCGA-DJ-A3VJ	0	0	4
TCGA-A8-A09Q	0	0	74		TCGA-49-4490	0	0	30		TCGA-DU-5872	0	0	14		TCGA-DJ-A4UL	0	0	4
TCGA-EK-A3GM	0	0	74		TCGA-69-7763	0	0	30		TCGA-DU-5874	0	0	14		TCGA-DJ-A4V5	0	0	4
TCGA-AG-A01W	0	0	74		TCGA-86-8074	0	0	30		TCGA-DU-8166	0	0	14		TCGA-DO-A1K0	0	0	4
TCGA-2H-A9GL	0	0	74		TCGA-24-1471	0	0	30		TCGA-E1-5302	0	0	14		TCGA-E3-A3E0	0	0	4
TCGA-CN-5359	0	0	74		TCGA-24-2254	0	0	30		TCGA-E1-5305	0	0	14		TCGA-E8-A2EA	0	0	4
TCGA-H7-8501	0	0	74		TCGA-29-1710	0	0	30		TCGA-FG-A4MX	0	0	14		TCGA-E8-A44K	0	0	4
TCGA-2Y-A9H1	0	0	74		TCGA-3A-A9J0	0	0	30		TCGA-HT-7467	0	0	14		TCGA-EL-A3CM	0	0	4
TCGA-DD-AADM	0	0	74		TCGA-HZ-8315	0	0	30		TCGA-HT-7469	0	0	14		TCGA-EL-A3CV	0	0	4
TCGA-MI-A75H	0	0	74		TCGA-CH-5754	0	0	30		TCGA-HT-7616	0	0	14		TCGA-EL-A3CX	0	0	4
TCGA-44-3398	0	0	74		TCGA-EJ-5530	0	0	30		TCGA-HT-7684	1	1	14		TCGA-EL-A3D1	0	0	4
TCGA-49-4486	0	0	74		TCGA-J9-A8CM	0	0	30		TCGA-HT-7875	0	0	14		TCGA-EL-A3GQ	0	0	4
TCGA-78-7161	0	0	74		TCGA-DX-AB2Q	0	0	30		TCGA-P5-A736	0	0	14		TCGA-EL-A3GR	0	0	4
TCGA-95-7944	0	0	74		TCGA-IS-A3KA	0	0	30		TCGA-QH-A65Z	0	0	14		TCGA-EL-A3GY	0	0	4
TCGA-18-3421	0	0	74		TCGA-QQ-A8VB	0	0	30		TCGA-S9-A6TV	0	0	14		TCGA-EL-A3N2	0	0	4
TCGA-56-7580	0	0	74		TCGA-N5-A4RJ	0	0	30		TCGA-S9-A6WI	0	0	14		TCGA-EL-A3T6	0	0	4
TCGA-60-2710	0	0	74		TCGA-ND-A4W6	0	0	30		TCGA-S9-A7J3	0	0	14		TCGA-EL-A3ZH	0	0	4
TCGA-60-2721	0	0	74		TCGA-AJ-A2QN	0	0	30		TCGA-TM-A7CF	0	0	14		TCGA-EL-A3ZK	0	0	4
TCGA-77-8009	0	0	74		TCGA-AP-A0LN	0	0	30		TCGA-TM-A84B	0	0	14		TCGA-EL-A3ZL	0	0	4
TCGA-77-8153	0	0	74		TCGA-B5-A0JX	0	0	30		TCGA-TQ-A7RO	0	0	14		TCGA-EL-A4JV	0	0	4
TCGA-77-A5GF	0	0	74		TCGA-B5-A11X	0	0	30		TCGA-VV-A829	0	0	14		TCGA-EL-A4K1	0	0	4
TCGA-85-A511	0	0	74		TCGA-B5-A5OD	0	0	30		TCGA-WY-A85C	0	0	14		TCGA-EL-A4K2	0	0	4
TCGA-VQ-A925	1	1	74		TCGA-BG-A0M3	0	0	30		TCGA-3C-AALJ	0	0	14		TCGA-EL-A4KD	0	0	4
TCGA-5N-A9KI	0	0	73		TCGA-D1-A17K	0	0	30		TCGA-A2-A0D4	0	0	14		TCGA-EM-A22K	0	0	4
TCGA-AC-A6IW	0	0	73		TCGA-D1-A1O8	0	0	30		TCGA-A2-A0EO	0	0	14		TCGA-EM-A2CJ	0	0	4
TCGA-BH-A1F8	0	0	73		TCGA-DI-A2QU	0	0	30		TCGA-A2-A0EX	0	0	14		TCGA-EM-A3AQ	0	0	4
TCGA-C8-A3M7	0	0	73		TCGA-EY-A1GL	0	0	30		TCGA-A2-A0SV	0	0	14		TCGA-EM-A3O9	0	0	4
TCGA-GM-A2DO	0	0	73		TCGA-EY-A1GX	0	0	30		TCGA-A2-A0T1	0	0	14		TCGA-EM-A4FR	0	0	4
TCGA-VS-A8EJ	0	0	73		TCGA-EY-A214	0	0	30		TCGA-A2-A0T3	0	0	14		TCGA-ET-A25G	0	0	4
TCGA-CK-4952	0	0	73		TCGA-EY-A72D	0	0	30		TCGA-A2-A0T6	0	0	14		TCGA-ET-A2N0	0	0	4
TCGA-DM-A1DA	1	1	73		TCGA-KP-A3VZ	0	0	30		TCGA-A2-A1FV	0	0	14		TCGA-ET-A2N5	0	0	4
TCGA-GS-A9TY	0	0	73		TCGA-SL-A6J9	0	0	30		TCGA-A7-A425	0	0	14		TCGA-ET-A39I	0	0	4
TCGA-L5-A88V	0	0	73		TCGA-OR-A5J7	0	0	29		TCGA-A7-A4SC	0	0	14		TCGA-ET-A39J	0	0	4
TCGA-CV-6954	0	0	73		TCGA-CU-A0YO	0	0	29		TCGA-A8-A06T	0	0	14		TCGA-ET-A39K	0	0	4
TCGA-B0-4698	0	0	73		TCGA-FD-A43Y	0	0	29		TCGA-A8-A090	0	0	14		TCGA-ET-A39M	0	0	4
TCGA-CC-A7IJ	0	0	73		TCGA-DU-5852	0	0	29		TCGA-A8-A096	0	0	14		TCGA-ET-A39T	0	0	4
TCGA-DD-AACZ	0	0	73		TCGA-FG-6688	1	1	29		TCGA-AC-A2FG	0	0	14		TCGA-ET-A40P	0	0	4
TCGA-22-5482	0	0	73		TCGA-FG-A6IZ	0	0	29		TCGA-AC-A6NO	0	0	14		TCGA-ET-A40T	0	0	4
TCGA-34-5241	0	0	73		TCGA-HT-7689	0	0	29		TCGA-AN-A0XV	0	0	14		TCGA-FE-A234	0	0	4
TCGA-43-5670	0	0	73		TCGA-QH-A6X9	1	1	29		TCGA-AO-A125	0	0	14		TCGA-FE-A235	0	0	4
TCGA-85-8288	0	0	73		TCGA-RY-A83Z	0	0	29		TCGA-AR-A1AS	0	0	14		TCGA-FE-A236	0	0	4
TCGA-XC-AA0X	0	0	73		TCGA-WY-A85E	0	0	29		TCGA-AR-A5QP	0	0	14		TCGA-FE-A3PD	0	0	4
TCGA-BF-A5EP	0	0	73		TCGA-A2-A0CM	0	0	29		TCGA-B6-A0IE	0	0	14		TCGA-FK-A3SB	0	0	4
TCGA-EB-A553	0	0	73		TCGA-A2-A1FW	0	0	29		TCGA-B6-A0IM	0	0	14		TCGA-FY-A2QD	0	0	4
TCGA-GF-A769	0	0	73		TCGA-A2-A3XT	0	0	29		TCGA-BH-A0C1	0	0	14		TCGA-FY-A3I5	0	0	4
TCGA-IN-A6RR	0	0	73		TCGA-AC-A5XU	0	0	29		TCGA-BH-A0DI	0	0	14		TCGA-FY-A3R8	0	0	4
TCGA-4Z-AA7O	0	0	72		TCGA-AC-A6IX	0	0	29		TCGA-BH-A0DQ	0	0	14		TCGA-FY-A3TY	0	0	4
TCGA-4Z-AA86	1	1	72		TCGA-AR-A1AK	0	0	29		TCGA-C8-A1HO	0	0	14		TCGA-FY-A3WA	0	0	4
TCGA-K4-A4AC	0	0	72		TCGA-AR-A1AY	0	0	29		TCGA-D8-A1XC	0	0	14		TCGA-FY-A40M	0	0	4
TCGA-XF-AAMZ	0	0	72		TCGA-C8-A12W	0	0	29		TCGA-D8-A27I	0	0	14		TCGA-H2-A421	0	0	4
TCGA-AO-A0JC	0	0	72		TCGA-D8-A27W	0	0	29		TCGA-E2-A15O	0	0	14		TCGA-IM-A3EB	0	0	4
TCGA-D8-A27V	0	0	72		TCGA-E2-A14Z	0	0	29		TCGA-E2-A1BD	0	0	14		TCGA-J8-A3YE	0	0	4
TCGA-E9-A1RF	0	0	72		TCGA-E9-A3HO	0	0	29		TCGA-E2-A1L9	0	0	14		TCGA-KS-A41J	0	0	4
TCGA-VS-A9V3	0	0	72		TCGA-OL-A66I	0	0	29		TCGA-E9-A1N3	0	0	14		TCGA-KS-A4I1	0	0	4
TCGA-AG-A02X	0	0	72		TCGA-PE-A5DD	0	0	29		TCGA-E9-A22A	0	0	14		TCGA-KS-A4IB	0	0	4
TCGA-A6-3808	0	0	72		TCGA-C5-A2LV	0	0	29		TCGA-E9-A3X8	0	0	14		TCGA-WC-A87T	0	0	4
TCGA-D5-6533	0	0	72		TCGA-C5-A7CJ	0	0	29		TCGA-GM-A2DK	0	0	14		TCGA-V4-A9E9	0	0	4
TCGA-D5-6535	0	0	72		TCGA-EA-A1QS	0	0	29		TCGA-LL-A6FQ	0	0	14		TCGA-WC-A881	0	0	4
TCGA-FF-A7CQ	0	0	72		TCGA-AG-3901	0	0	29		TCGA-JW-A69B	0	0	14		TCGA-WC-A87W	0	0	4
TCGA-JY-A6FH	0	0	72		TCGA-AG-A015	1	1	29		TCGA-VS-A9UM	0	0	14		TCGA-V4-A9F1	0	0	4
TCGA-VR-A8EX	0	0	72		TCGA-CI-6619	0	0	29		TCGA-VS-A9UQ	0	0	14		TCGA-V4-A9EH	0	0	4
TCGA-CV-5978	0	0	72		TCGA-F5-6863	0	0	29		TCGA-ZJ-AAX8	0	0	14		TCGA-V4-A9EW	0	0	4
TCGA-CV-6956	0	0	72		TCGA-AZ-4323	0	0	29		TCGA-ZJ-AAXI	0	0	14		TCGA-OR-A5JL	0	0	3
TCGA-CV-6960	0	0	72		TCGA-CA-5255	0	0	29		TCGA-3X-AAVA	0	0	14		TCGA-OR-A5JO	0	0	3
TCGA-CV-7446	0	0	72		TCGA-CK-5915	0	0	29		TCGA-4G-AAZT	0	0	14		TCGA-OR-A5JQ	0	0	3
TCGA-HD-7229	0	0	72		TCGA-GS-A9TU	0	0	29		TCGA-W5-AA2R	0	0	14		TCGA-OR-A5JR	0	0	3
TCGA-DD-AACU	0	0	72		TCGA-JY-A6FB	0	0	29		TCGA-W5-AA33	0	0	14		TCGA-OR-A5K1	0	0	3
TCGA-49-4494	0	0	72		TCGA-LN-A49K	0	0	29		TCGA-W5-AA38	0	0	14		TCGA-OR-A5L9	0	0	3
TCGA-22-5480	0	0	72		TCGA-LN-A49W	0	0	29		TCGA-26-5132	0	0	14		TCGA-OR-A5LS	0	0	3
TCGA-OR-A5K9	1	1	71		TCGA-06-1804	0	0	29		TCGA-RR-A6KA	0	0	14		TCGA-OR-A5LT	0	0	3
TCGA-4Z-AA89	0	0	71		TCGA-19-4065	0	0	29		TCGA-06-0219	0	0	14		TCGA-DB-A4X9	0	0	3
TCGA-G2-AA3F	0	0	71		TCGA-27-1834	0	0	29		TCGA-CN-5358	0	0	14		TCGA-DB-A64S	0	0	3
TCGA-GU-A766	0	0	71		TCGA-27-2521	0	0	29		TCGA-CV-6939	0	0	14		TCGA-DU-A5TS	0	0	3
TCGA-UY-A78M	0	0	71		TCGA-28-2513	0	0	29		TCGA-QK-A6IF	0	0	14		TCGA-E1-A7YY	0	0	3
TCGA-XF-A9SK	0	0	71		TCGA-BA-A6DD	0	0	29		TCGA-AK-3429	0	0	14		TCGA-HT-7681	0	0	3
TCGA-A8-A094	0	0	71		TCGA-BB-A5HZ	0	0	29		TCGA-B0-5121	1	1	14		TCGA-HT-7856	0	0	3
TCGA-D8-A1Y1	0	0	71		TCGA-CV-7177	0	0	29		TCGA-B0-5400	0	0	14		TCGA-HT-7857	0	0	3
TCGA-EW-A1PB	0	0	71		TCGA-CV-7183	0	0	29		TCGA-B0-5694	0	0	14		TCGA-HW-7486	0	0	3
TCGA-FU-A3HY	0	0	71		TCGA-CV-7434	0	0	29		TCGA-B8-5552	0	0	14		TCGA-KT-A74X	0	0	3
TCGA-AY-4071	0	0	71		TCGA-CV-A45Y	0	0	29		TCGA-BP-5180	0	0	14		TCGA-R8-A6ML	0	0	3
TCGA-F4-6854	0	0	71		TCGA-H7-A6C5	0	0	29		TCGA-BP-5194	0	0	14		TCGA-S9-A6WE	0	0	3
TCGA-FF-8061	0	0	71		TCGA-IQ-A6SH	0	0	29		TCGA-BP-5201	0	0	14		TCGA-A2-A1G6	0	0	3
TCGA-L5-A43C	0	0	71		TCGA-QK-AA3J	0	0	29		TCGA-CW-5585	0	0	14		TCGA-AO-A03U	0	0	3
TCGA-LN-A4A9	0	0	71		TCGA-3Z-A93Z	0	0	29		TCGA-CZ-5984	0	0	14		TCGA-BH-A0DT	0	0	3
TCGA-BA-4076	0	0	71		TCGA-A3-3311	1	1	29		TCGA-MW-A4EC	0	0	14		TCGA-D8-A1XS	0	0	3
TCGA-CQ-5332	0	0	71		TCGA-A3-3346	0	0	29		TCGA-AL-3466	0	0	14		TCGA-D8-A27E	0	0	3
TCGA-CQ-5334	0	0	71		TCGA-A3-3367	1	1	29		TCGA-B3-8121	0	0	14		TCGA-EW-A1PG	0	0	3
TCGA-DD-A11A	0	0	71		TCGA-B0-4710	1	1	29		TCGA-B9-4115	0	0	14		TCGA-CR-7391	0	0	3
TCGA-DD-A4NV	0	0	71		TCGA-B0-4823	0	0	29		TCGA-BQ-7046	0	0	14		TCGA-KL-8340	0	0	3
TCGA-DD-AADS	0	0	71		TCGA-B0-4852	1	1	29		TCGA-DZ-6134	0	0	14		TCGA-KN-8437	0	0	3
TCGA-49-AAR3	0	0	71		TCGA-B4-5838	0	0	29		TCGA-F9-A8NY	0	0	14		TCGA-CJ-4904	0	0	3
TCGA-4B-A93V	0	0	71		TCGA-B8-A54J	0	0	29		TCGA-J7-A8I2	0	0	14		TCGA-BQ-7055	0	0	3
TCGA-97-7547	0	0	71		TCGA-CJ-4638	0	0	29		TCGA-P4-A5EA	0	0	14		TCGA-85-A4PA	0	0	3
TCGA-97-8179	0	0	71		TCGA-CJ-4907	0	0	29		TCGA-SX-A7SU	0	0	14		TCGA-UD-AAC7	0	0	3
TCGA-97-A4LX	0	0	71		TCGA-CJ-4918	0	0	29		TCGA-DD-A3A6	0	0	14		TCGA-57-1586	0	0	3
TCGA-MP-A4TE	0	0	71		TCGA-CJ-5682	1	1	29		TCGA-DD-A4NL	0	0	14		TCGA-13-0714	0	0	3
TCGA-18-3410	0	0	71		TCGA-CZ-4853	0	0	29		TCGA-ED-A5KG	0	0	14		TCGA-3A-A9IO	0	0	3
TCGA-22-5478	0	0	71		TCGA-G6-A8L6	1	1	29		TCGA-RC-A6M5	0	0	14		TCGA-HZ-8317	0	0	3
TCGA-33-4538	0	0	71		TCGA-G6-A8L7	0	0	29		TCGA-44-2665	0	0	14		TCGA-HZ-A77O	0	0	3
TCGA-56-8309	0	0	71		TCGA-G6-A8L8	0	0	29		TCGA-44-2666	1	1	14		TCGA-P7-A5NY	0	0	3
TCGA-60-2719	0	0	71		TCGA-MM-A564	0	0	29		TCGA-44-A47G	0	0	14		TCGA-P8-A5KD	0	0	3
TCGA-66-2800	0	0	71		TCGA-A4-A48D	0	0	29		TCGA-55-6984	0	0	14		TCGA-PR-A5PH	0	0	3
TCGA-77-8008	0	0	71		TCGA-AL-7173	0	0	29		TCGA-64-1680	0	0	14		TCGA-QR-A6GO	0	0	3
TCGA-79-5596	0	0	71		TCGA-BQ-7045	0	0	29		TCGA-75-7025	1	1	14		TCGA-QR-A6GZ	0	0	3
TCGA-94-7943	0	0	71		TCGA-F9-A7VF	0	0	29		TCGA-78-7162	0	0	14		TCGA-QR-A705	0	0	3
TCGA-WP-A9GB	0	0	71		TCGA-IZ-A6M9	0	0	29		TCGA-97-8177	0	0	14		TCGA-QR-A706	0	0	3
TCGA-C4-A0F6	0	0	70		TCGA-UZ-A9Q1	0	0	29		TCGA-3H-AB3S	1	1	14		TCGA-QR-A70D	0	0	3
TCGA-CF-A27C	0	0	70		TCGA-Y8-A8S1	0	0	29		TCGA-3U-A98E	0	0	14		TCGA-QR-A70O	0	0	3
TCGA-GV-A3QH	0	0	70		TCGA-DD-A1EL	0	0	29		TCGA-LK-A4NW	0	0	14		TCGA-QR-A70Q	0	0	3
TCGA-A8-A07W	0	0	70		TCGA-DD-A4NR	0	0	29		TCGA-LK-A4O5	0	0	14		TCGA-RW-A68D	0	0	3
TCGA-A8-A095	1	1	70		TCGA-DD-AADC	0	0	29		TCGA-NQ-A638	0	0	14		TCGA-S7-A7WN	0	0	3
TCGA-E2-A108	0	0	70		TCGA-LG-A9QD	0	0	29		TCGA-SC-A6LQ	0	0	14		TCGA-SP-A6QD	0	0	3
TCGA-LP-A5U2	0	0	70		TCGA-55-7815	0	0	29		TCGA-TS-A7OU	0	0	14		TCGA-SR-A6MP	0	0	3
TCGA-VS-A8QH	0	0	70		TCGA-62-A472	0	0	29		TCGA-TS-A7PB	1	1	14		TCGA-SR-A6MT	0	0	3
TCGA-VS-A9UC	0	0	70		TCGA-39-5021	0	0	29		TCGA-UT-A88G	0	0	14		TCGA-SR-A6MV	0	0	3
TCGA-AF-A56L	0	0	70		TCGA-24-1427	1	1	29		TCGA-09-1670	0	0	14		TCGA-SR-A6MY	0	0	3
TCGA-AG-3742	0	0	70		TCGA-24-1850	0	0	29		TCGA-23-1027	0	0	14		TCGA-W2-A7HE	0	0	3
TCGA-A6-3810	0	0	70		TCGA-24-2281	0	0	29		TCGA-24-1562	0	0	14		TCGA-W2-A7HF	0	0	3
TCGA-D5-6534	0	0	70		TCGA-13-0726	0	0	29		TCGA-25-2396	0	0	14		TCGA-W2-A7HH	0	0	3
TCGA-DM-A1D4	0	0	70		TCGA-HZ-A77Q	0	0	29		TCGA-29-1705	0	0	14		TCGA-WB-A80Y	0	0	3
TCGA-CN-6020	0	0	70		TCGA-CH-5737	0	0	29		TCGA-5X-AA5U	0	0	14		TCGA-WB-A818	0	0	3
TCGA-CV-6962	0	0	70		TCGA-CH-5772	0	0	29		TCGA-OY-A56P	0	0	14		TCGA-WB-A81J	0	0	3
TCGA-IQ-7630	0	0	70		TCGA-EJ-5521	0	0	29		TCGA-2J-AABU	0	0	14		TCGA-WB-A81M	0	0	3
TCGA-MH-A854	0	0	70		TCGA-DX-A1KX	0	0	29		TCGA-2L-AAQI	0	0	14		TCGA-EJ-A6RA	0	0	3
TCGA-CC-5263	0	0	70		TCGA-DX-A1L2	0	0	29		TCGA-3A-A9IZ	0	0	14		TCGA-G9-6336	0	0	3
TCGA-05-4418	0	0	70		TCGA-DX-A8BG	0	0	29		TCGA-FB-AAPZ	0	0	14		TCGA-J4-A67T	0	0	3
TCGA-86-7713	0	0	70		TCGA-K1-A6RT	0	0	29		TCGA-HV-A5A3	0	0	14		TCGA-V1-A8ML	0	0	3
TCGA-NJ-A55O	0	0	70		TCGA-VQ-A94P	0	0	29		TCGA-IB-7891	0	0	14		TCGA-VN-A88M	0	0	3
TCGA-22-4596	0	0	70		TCGA-ZB-A96V	0	0	29		TCGA-LB-A9Q5	0	0	14		TCGA-YL-A9WX	0	0	3
TCGA-60-2725	0	0	70		TCGA-N5-A4R8	0	0	29		TCGA-PZ-A5RE	0	0	14		TCGA-DX-A3UD	0	0	3
TCGA-66-2794	0	0	70		TCGA-N5-A4RD	0	0	29		TCGA-QR-A6GY	0	0	14		TCGA-IS-A3K8	0	0	3
TCGA-85-8276	0	0	70		TCGA-N5-A4RT	0	0	29		TCGA-2A-A8W3	0	0	14		TCGA-RD-A8N4	0	0	3
TCGA-85-A510	0	0	70		TCGA-NA-A4QW	0	0	29		TCGA-CH-5751	0	0	14		TCGA-2G-AAFI	0	0	3
TCGA-EO-A3AS	0	0	70		TCGA-A5-A0R6	0	0	29		TCGA-EJ-5509	0	0	14		TCGA-2G-AAFO	0	0	3
TCGA-FD-A5BV	0	0	69		TCGA-AJ-A3BI	0	0	29		TCGA-EJ-5511	0	0	14		TCGA-2G-AAGE	0	0	3
TCGA-ZF-AA4N	0	0	69		TCGA-AJ-A3EJ	0	0	29		TCGA-EJ-7125	0	0	14		TCGA-2G-AAGF	0	0	3
TCGA-C5-A8YQ	0	0	69		TCGA-B5-A0K4	0	0	29		TCGA-EJ-7788	0	0	14		TCGA-2G-AAGK	0	0	3
TCGA-AA-3695	0	0	69		TCGA-BK-A56F	0	0	29		TCGA-G9-6338	0	0	14		TCGA-2G-AAH2	0	0	3
TCGA-BB-A5HU	0	0	69		TCGA-D1-A15V	0	0	29		TCGA-G9-6369	0	0	14		TCGA-2G-AAHT	0	0	3
TCGA-CQ-5326	0	0	69		TCGA-D1-A3DA	0	0	29		TCGA-G9-6379	0	0	14		TCGA-4K-AA1H	0	0	3
TCGA-CV-6942	0	0	69		TCGA-CF-A8HX	0	0	28		TCGA-G9-6498	0	0	14		TCGA-S6-A8JW	0	0	3
TCGA-CV-7101	0	0	69		TCGA-FD-A3SQ	0	0	28		TCGA-HC-7081	0	0	14		TCGA-S6-A8JX	0	0	3
TCGA-CV-A45P	0	0	69		TCGA-DU-7012	0	0	28		TCGA-HC-7740	0	0	14		TCGA-SN-A84Y	0	0	3
TCGA-BD-A3EP	0	0	69		TCGA-E1-A7YN	0	0	28		TCGA-HC-7742	0	0	14		TCGA-VF-A8AC	0	0	3
TCGA-DD-A113	0	0	69		TCGA-HT-A5RC	0	0	28		TCGA-J4-8198	0	0	14		TCGA-VF-A8AD	0	0	3
TCGA-G3-A3CK	0	0	69		TCGA-S9-A7IS	0	0	28		TCGA-J9-A8CK	0	0	14		TCGA-XE-A8H4	0	0	3
TCGA-MI-A75I	0	0	69		TCGA-A2-A04R	0	0	28		TCGA-KC-A4BV	0	0	14		TCGA-XE-AAOD	0	0	3
TCGA-L9-A743	0	0	69		TCGA-A2-A04U	0	0	28		TCGA-KK-A6E6	0	0	14		TCGA-ZM-AA0D	0	0	3
TCGA-66-2780	0	0	69		TCGA-A2-A4S3	0	0	28		TCGA-KK-A8IG	0	0	14		TCGA-2G-AALQ	0	0	3
TCGA-24-2267	0	0	69		TCGA-A8-A07B	0	0	28		TCGA-TK-A8OK	0	0	14		TCGA-2G-AALX	0	0	3
TCGA-24-2298	0	0	69		TCGA-A8-A07I	0	0	28		TCGA-V1-A8MF	0	0	14		TCGA-3G-AB0Q	0	0	3
TCGA-61-1907	0	0	69		TCGA-AC-A62Y	0	0	28		TCGA-V1-A8WL	0	0	14		TCGA-3Q-A9WF	0	0	3
TCGA-VQ-AA68	0	0	69		TCGA-AN-A0FT	0	0	28		TCGA-V1-A9O9	0	0	14		TCGA-4V-A9QN	0	0	3
TCGA-BT-A42F	0	0	68		TCGA-AR-A0TT	0	0	28		TCGA-V1-A9Z7	0	0	14		TCGA-4X-A9FA	0	0	3
TCGA-CF-A3MG	0	0	68		TCGA-BH-A0DL	0	0	28		TCGA-VP-A87J	0	0	14		TCGA-5G-A9ZZ	0	0	3
TCGA-GC-A3OO	0	0	68		TCGA-BH-A1F2	0	0	28		TCGA-XJ-A83H	0	0	14		TCGA-5K-AAAP	0	0	3
TCGA-GV-A3QF	0	0	68		TCGA-C8-A1HI	0	0	28		TCGA-XK-AAJT	0	0	14		TCGA-X7-A8DB	0	0	3
TCGA-ZF-AA53	0	0	68		TCGA-D8-A27F	0	0	28		TCGA-YL-A8HL	0	0	14		TCGA-X7-A8M1	0	0	3
TCGA-A8-A09I	0	0	68		TCGA-E2-A105	0	0	28		TCGA-YL-A9WY	0	0	14		TCGA-X7-A8M4	0	0	3
TCGA-A8-A09M	0	0	68		TCGA-E2-A155	0	0	28		TCGA-ZG-A9L1	0	0	14		TCGA-X7-A8M8	0	0	3
TCGA-AN-A0AT	0	0	68		TCGA-S3-AA17	0	0	28		TCGA-ZG-A9L5	0	0	14		TCGA-XM-A8R8	0	0	3
TCGA-AN-A0XN	0	0	68		TCGA-HG-A2PA	0	0	28		TCGA-ZG-A9LM	0	0	14		TCGA-XM-A8R9	0	0	3
TCGA-BH-A0AW	0	0	68		TCGA-JX-A3Q8	0	0	28		TCGA-ZG-A9LZ	0	0	14		TCGA-XU-A931	0	0	3
TCGA-C8-A8HP	0	0	68		TCGA-VS-A8EH	0	0	28		TCGA-3B-A9HZ	0	0	14		TCGA-XU-AAXX	0	0	3
TCGA-AY-A54L	0	0	68		TCGA-ZJ-AAXF	0	0	28		TCGA-DX-A6BB	0	0	14		TCGA-XU-AAXZ	0	0	3
TCGA-CM-4752	0	0	68		TCGA-ZJ-AAXN	0	0	28		TCGA-DX-AB35	0	0	14		TCGA-BJ-A192	0	0	3
TCGA-CM-6677	0	0	68		TCGA-CI-6623	0	0	28		TCGA-DX-AB3B	0	0	14		TCGA-BJ-A45H	0	0	3
TCGA-G4-6294	0	0	68		TCGA-DC-4749	0	0	28		TCGA-HB-A3L4	0	0	14		TCGA-CE-A3MD	0	0	3
TCGA-CV-7432	0	0	68		TCGA-DC-6683	0	0	28		TCGA-X6-A7WB	1	1	14		TCGA-DE-A4MA	0	0	3
TCGA-44-A4SU	0	0	68		TCGA-DY-A1H8	0	0	28		TCGA-ER-A19T	0	0	14		TCGA-DJ-A13V	0	0	3
TCGA-49-4507	0	0	68		TCGA-EF-5830	0	0	28		TCGA-ER-A19T	0	0	14		TCGA-DJ-A1QD	0	0	3
TCGA-55-7903	0	0	68		TCGA-AA-A004	0	0	28		TCGA-2G-AAH3	0	0	14		TCGA-DJ-A1QN	0	0	3
TCGA-33-AASJ	0	0	68		TCGA-AZ-6607	0	0	28		TCGA-ZM-AA0H	0	0	14		TCGA-DJ-A2PQ	0	0	3
TCGA-43-3394	0	0	68		TCGA-IG-A5S3	0	0	28		TCGA-XU-A936	0	0	14		TCGA-DJ-A2PS	0	0	3
TCGA-63-7022	0	0	68		TCGA-L5-A8NL	0	0	28		TCGA-YT-A95D	0	0	14		TCGA-DJ-A2PT	0	0	3
TCGA-63-A5MY	0	0	68		TCGA-LN-A4A4	0	0	28		TCGA-ZB-A96E	0	0	14		TCGA-DJ-A2Q2	0	0	3
TCGA-66-2778	0	0	68		TCGA-LN-A7HZ	0	0	28		TCGA-EL-A3CR	0	0	14		TCGA-DJ-A2QB	0	0	3
TCGA-ZF-A9R0	0	0	67		TCGA-06-5413	0	0	28		TCGA-NA-A5I1	0	0	14		TCGA-DJ-A3UT	0	0	3
TCGA-AC-A5EH	0	0	67		TCGA-19-2624	0	0	28		TCGA-A5-A2K4	0	0	14		TCGA-DJ-A3UU	0	0	3
TCGA-LL-A73Y	0	0	67		TCGA-19-2629	0	0	28		TCGA-B5-A11M	0	0	14		TCGA-DJ-A3UX	0	0	3
TCGA-NH-A8F8	0	0	67		TCGA-26-5136	0	0	28		TCGA-B5-A1MU	0	0	14		TCGA-DJ-A3VL	0	0	3
TCGA-FA-8693	1	1	67		TCGA-27-2523	0	0	28		TCGA-BG-A0MT	0	0	14		TCGA-E8-A436	0	0	3
TCGA-IG-A50L	0	0	67		TCGA-41-4097	0	0	28		TCGA-D1-A16O	0	0	14		TCGA-EL-A3CL	0	0	3
TCGA-JY-A6FD	0	0	67		TCGA-14-0789	0	0	28		TCGA-EO-A1Y8	0	0	14		TCGA-EL-A3CP	0	0	3
TCGA-L5-A4ON	0	0	67		TCGA-14-0790	0	0	28		TCGA-VD-AA8M	0	0	14		TCGA-EL-A3H2	0	0	3
TCGA-BA-A8YP	0	0	67		TCGA-CN-5367	0	0	28		TCGA-OR-A5JC	0	0	13		TCGA-EL-A3MW	0	0	3
TCGA-CN-6013	0	0	67		TCGA-CN-6998	0	0	28		TCGA-CF-A3MF	0	0	13		TCGA-EL-A3T8	0	0	3
TCGA-CN-6997	0	0	67		TCGA-CV-6433	0	0	28		TCGA-CF-A47T	0	0	13		TCGA-EL-A4JX	0	0	3
TCGA-CQ-6218	0	0	67		TCGA-T2-A6WZ	0	0	28		TCGA-CF-A47W	0	0	13		TCGA-EL-A4KH	0	0	3
TCGA-CV-6937	0	0	67		TCGA-A3-3358	1	1	28		TCGA-CS-4943	0	0	13		TCGA-EM-A1CS	0	0	3
TCGA-CV-A45O	0	0	67		TCGA-B0-5110	0	0	28		TCGA-DB-5275	0	0	13		TCGA-EM-A1CV	0	0	3
TCGA-CX-7219	0	0	67		TCGA-B0-5696	1	1	28		TCGA-DB-A4XH	0	0	13		TCGA-EM-A1YA	0	0	3
TCGA-D6-8569	0	0	67		TCGA-B4-5832	0	0	28		TCGA-DB-A64W	0	0	13		TCGA-EM-A22L	0	0	3
TCGA-FV-A495	0	0	67		TCGA-B8-4153	0	0	28		TCGA-DU-6395	0	0	13		TCGA-EM-A2OW	0	0	3
TCGA-G3-A7M9	1	1	67		TCGA-BP-4989	0	0	28		TCGA-DU-6410	0	0	13		TCGA-EM-A2P1	0	0	3
TCGA-18-3412	0	0	67		TCGA-BP-5189	0	0	28		TCGA-DU-7008	0	0	13		TCGA-EM-A2P3	0	0	3
TCGA-43-6647	0	0	67		TCGA-CJ-5675	0	0	28		TCGA-DU-7019	0	0	13		TCGA-EM-A3AN	0	0	3
TCGA-HC-A4ZV	0	0	67		TCGA-CJ-5686	0	0	28		TCGA-DU-7294	0	0	13		TCGA-EM-A3AO	0	0	3
TCGA-HU-8249	0	0	67		TCGA-CJ-6031	0	0	28		TCGA-DU-7299	0	0	13		TCGA-EM-A3FL	0	0	3
TCGA-VQ-A8P8	0	0	67		TCGA-DV-5565	0	0	28		TCGA-DU-7304	0	0	13		TCGA-EM-A3O6	0	0	3
TCGA-CU-A0YR	0	0	66		TCGA-5P-A9KC	0	0	28		TCGA-DU-8164	1	1	13		TCGA-EM-A3O7	0	0	3
TCGA-EA-A3Y4	0	0	66		TCGA-A4-7997	0	0	28		TCGA-E1-5303	0	0	13		TCGA-EM-A4FK	0	0	3
TCGA-FU-A23L	0	0	66		TCGA-BQ-7058	0	0	28		TCGA-FG-A60L	0	0	13		TCGA-EM-A4FQ	0	0	3
TCGA-F5-6864	0	0	66		TCGA-BQ-7059	0	0	28		TCGA-HT-7601	0	0	13		TCGA-EM-A4FU	0	0	3
TCGA-AA-3950	0	0	66		TCGA-IA-A40U	0	0	28		TCGA-HT-7606	0	0	13		TCGA-ET-A25R	0	0	3
TCGA-CM-5348	0	0	66		TCGA-SX-A7SR	0	0	28		TCGA-HT-7882	0	0	13		TCGA-ET-A39O	0	0	3
TCGA-F4-6460	0	0	66		TCGA-2Y-A9H4	0	0	28		TCGA-HT-A5RB	0	0	13		TCGA-ET-A3BX	0	0	3
TCGA-QG-A5YW	0	0	66		TCGA-2Y-A9H6	0	0	28		TCGA-HT-A614	0	0	13		TCGA-ET-A40S	0	0	3
TCGA-Z6-A8JE	0	0	66		TCGA-2Y-A9H8	0	0	28		TCGA-HT-A617	0	0	13		TCGA-FE-A237	0	0	3
TCGA-06-5858	0	0	66		TCGA-BC-A216	0	0	28		TCGA-HW-7490	0	0	13		TCGA-FE-A3PB	0	0	3
TCGA-CN-A49A	0	0	66		TCGA-BD-A2L6	0	0	28		TCGA-S9-A7IY	0	0	13		TCGA-FK-A4UB	0	0	3
TCGA-CR-6491	0	0	66		TCGA-CC-A123	0	0	28		TCGA-TM-A84C	0	0	13		TCGA-FY-A3YR	0	0	3
TCGA-CR-7394	0	0	66		TCGA-DD-A4NN	0	0	28		TCGA-TM-A84F	0	0	13		TCGA-FY-A4B3	0	0	3
TCGA-P3-A6SX	0	0	66		TCGA-ES-A2HS	0	0	28		TCGA-TM-A84M	0	0	13		TCGA-H2-A26U	0	0	3
TCGA-T3-A92N	0	0	66		TCGA-K7-AAU7	0	0	28		TCGA-TQ-A7RU	0	0	13		TCGA-IM-A4EB	0	0	3
TCGA-UF-A7JA	0	0	66		TCGA-XR-A8TD	0	0	28		TCGA-TQ-A8XE	0	0	13		TCGA-J8-A3NZ	0	0	3
TCGA-CC-A7IG	1	1	66		TCGA-XR-A8TG	0	0	28		TCGA-VM-A8CB	0	0	13		TCGA-J8-A3YD	0	0	3
TCGA-DD-AACF	0	0	66		TCGA-ZS-A9CG	0	0	28		TCGA-WY-A85D	0	0	13		TCGA-J8-A3YG	0	0	3
TCGA-FV-A2QQ	0	0	66		TCGA-55-6981	0	0	28		TCGA-A1-A0SQ	0	0	13		TCGA-VD-AA8T	0	0	3
TCGA-49-AAR0	0	0	66		TCGA-62-8395	0	0	28		TCGA-A2-A04X	0	0	13		TCGA-V4-A9ED	0	0	3
TCGA-93-7347	0	0	66		TCGA-69-7764	0	0	28		TCGA-A2-A0EN	0	0	13		TCGA-V4-A9ET	0	0	3
TCGA-J2-8194	0	0	66		TCGA-13-2060	0	0	28		TCGA-A2-A0ER	0	0	13		TCGA-WC-A882	0	0	3
TCGA-33-4582	0	0	66		TCGA-23-2081	0	0	28		TCGA-A2-A1G1	0	0	13		TCGA-V4-A9EV	0	0	3
TCGA-66-2792	0	0	66		TCGA-24-1418	0	0	28		TCGA-A2-A1G4	0	0	13		TCGA-VD-A8K7	0	0	3
TCGA-23-1114	0	0	66		TCGA-29-1693	0	0	28		TCGA-A2-A25C	0	0	13		TCGA-DB-A64U	0	0	2
TCGA-24-1844	0	0	66		TCGA-61-2102	0	0	28		TCGA-A2-A3XX	0	0	13		TCGA-QH-A6X5	0	0	2
TCGA-FB-AAPP	0	0	66		TCGA-HV-A7OL	0	0	28		TCGA-A7-A2KD	0	0	13		TCGA-A2-A0EP	0	0	2
TCGA-BF-A3DJ	0	0	66		TCGA-HZ-7919	0	0	28		TCGA-A7-A5ZW	0	0	13		TCGA-AC-A7VC	0	0	2
TCGA-VQ-AA6J	0	0	66		TCGA-HC-8265	0	0	28		TCGA-A8-A08J	0	0	13		TCGA-AO-A1KO	0	0	2
TCGA-EY-A547	0	0	66		TCGA-ZG-A9N3	0	0	28		TCGA-A8-A0A2	0	0	13		TCGA-BH-A0W5	0	0	2
TCGA-E7-A6ME	0	0	65		TCGA-DX-AB2V	0	0	28		TCGA-AN-A041	0	0	13		TCGA-C8-A137	0	0	2
TCGA-FD-A6TD	0	0	65		TCGA-X6-A8C6	0	0	28		TCGA-AN-A0XP	0	0	13		TCGA-C8-A273	0	0	2
TCGA-A2-A0SY	0	0	65		TCGA-ER-A42H	0	0	28		TCGA-AR-A0U3	0	0	13		TCGA-E9-A1NG	0	0	2
TCGA-AC-A8OP	0	0	65		TCGA-VQ-A928	0	0	28		TCGA-AR-A1AQ	0	0	13		TCGA-OL-A5RV	0	0	2
TCGA-BH-A0H5	0	0	65		TCGA-5U-AB0D	0	0	28		TCGA-AR-A1AX	0	0	13		TCGA-PL-A8LY	0	0	2
TCGA-AG-A00C	0	0	65		TCGA-N5-A4RO	0	0	28		TCGA-AR-A24L	0	0	13		TCGA-C5-A8YT	0	0	2
TCGA-AH-6644	0	0	65		TCGA-N9-A4Q1	0	0	28		TCGA-B6-A0RL	0	0	13		TCGA-W5-AA2H	0	0	2
TCGA-AA-3511	0	0	65		TCGA-NA-A4QY	0	0	28		TCGA-B6-A0WW	0	0	13		TCGA-IG-A7DP	0	0	2
TCGA-AA-3660	0	0	65		TCGA-AP-A05P	0	0	28		TCGA-B6-A0X0	0	0	13		TCGA-06-0139	0	0	2
TCGA-CA-6719	0	0	65		TCGA-AP-A0L9	0	0	28		TCGA-BH-A0BF	0	0	13		TCGA-KN-8421	0	0	2
TCGA-D5-6920	0	0	65		TCGA-BG-A0MC	0	0	28		TCGA-BH-A0BV	0	0	13		TCGA-G7-A8LC	0	0	2
TCGA-DM-A280	0	0	65		TCGA-BG-A0MU	0	0	28		TCGA-BH-A0DE	0	0	13		TCGA-44-6148	0	0	2
TCGA-NH-A8F7	0	0	65		TCGA-EY-A1GW	0	0	28		TCGA-BH-A0HY	0	0	13		TCGA-98-A53C	0	0	2
TCGA-FF-8047	0	0	65		TCGA-OR-A5LK	0	0	27		TCGA-BH-A18R	0	0	13		TCGA-3H-AB3X	0	0	2
TCGA-VB-A8QN	0	0	65		TCGA-DK-A3IQ	0	0	27		TCGA-BH-A18S	0	0	13		TCGA-TS-A8AV	0	0	2
TCGA-R6-A6KZ	0	0	65		TCGA-FD-A5BU	0	0	27		TCGA-BH-A1EX	0	0	13		TCGA-10-0937	0	0	2
TCGA-CR-7386	0	0	65		TCGA-FJ-A871	0	0	27		TCGA-C8-A12Y	0	0	13		TCGA-IB-A5ST	0	0	2
TCGA-2Y-A9H9	0	0	65		TCGA-XF-A9SW	0	0	27		TCGA-C8-A1HK	0	0	13		TCGA-IB-AAUR	0	0	2
TCGA-CC-A5UE	0	0	65		TCGA-DU-5855	0	0	27		TCGA-D8-A1XA	0	0	13		TCGA-IB-AAUS	0	0	2
TCGA-CC-A8HV	1	1	65		TCGA-HT-7470	0	0	27		TCGA-D8-A1XM	0	0	13		TCGA-P7-A5NX	0	0	2
TCGA-DD-AACX	0	0	65		TCGA-TM-A84H	0	0	27		TCGA-D8-A1XV	0	0	13		TCGA-QR-A6H6	0	0	2
TCGA-FV-A496	0	0	65		TCGA-A2-A0D1	0	0	27		TCGA-E2-A15T	0	0	13		TCGA-QR-A702	0	0	2
TCGA-RC-A6M4	0	0	65		TCGA-A8-A06R	0	0	27		TCGA-E9-A3QA	0	0	13		TCGA-QR-A70M	0	0	2
TCGA-34-2608	0	0	65		TCGA-A8-A076	0	0	27		TCGA-EW-A1J6	0	0	13		TCGA-QR-A70R	0	0	2
TCGA-25-1320	0	0	65		TCGA-AQ-A0Y5	0	0	27		TCGA-EW-A1P0	0	0	13		TCGA-QT-A7U0	0	0	2
TCGA-R5-A805	0	0	65		TCGA-B6-A1KN	0	0	27		TCGA-EW-A1P6	0	0	13		TCGA-RW-A67Y	0	0	2
TCGA-FD-A3N6	0	0	64		TCGA-C8-A12U	0	0	27		TCGA-EW-A2FS	0	0	13		TCGA-RW-A68A	0	0	2
TCGA-GU-A42Q	0	0	64		TCGA-C8-A278	0	0	27		TCGA-GM-A5PX	0	0	13		TCGA-RW-A7D0	0	0	2
TCGA-HQ-A2OE	0	0	64		TCGA-D8-A1Y3	0	0	27		TCGA-LL-A7T0	0	0	13		TCGA-S7-A7WM	0	0	2
TCGA-A2-A0T0	0	0	64		TCGA-EW-A1OY	0	0	27		TCGA-OL-A66J	0	0	13		TCGA-S7-A7WR	0	0	2
TCGA-E2-A1LH	1	1	64		TCGA-GM-A2DB	0	0	27		TCGA-3X-AAVB	0	0	13		TCGA-SP-A6QG	0	0	2
TCGA-VS-A8EC	0	0	64		TCGA-GM-A3NW	0	0	27		TCGA-ZH-A8Y5	0	0	13		TCGA-SR-A6MS	0	0	2
TCGA-AG-3881	0	0	64		TCGA-BI-A20A	0	0	27		TCGA-EI-6881	1	1	13		TCGA-TT-A6YJ	0	0	2
TCGA-FA-A86F	0	0	64		TCGA-DR-A0ZL	0	0	27		TCGA-G4-6321	0	0	13		TCGA-TT-A6YK	0	0	2
TCGA-RQ-AAAT	0	0	64		TCGA-EX-A1H6	0	0	27		TCGA-2H-A9GM	0	0	13		TCGA-W2-A7H5	0	0	2
TCGA-LN-A7HX	0	0	64		TCGA-FU-A3EO	0	0	27		TCGA-06-2561	0	0	13		TCGA-WB-A81A	0	0	2
TCGA-R6-A8W8	0	0	64		TCGA-HM-A6W2	0	0	27		TCGA-06-2569	0	0	13		TCGA-WB-A81F	0	0	2
TCGA-C9-A47Z	0	0	64		TCGA-ZJ-AAX4	0	0	27		TCGA-06-5411	0	0	13		TCGA-WB-A81N	0	0	2
TCGA-CN-4734	0	0	64		TCGA-ZJ-AAXA	0	0	27		TCGA-26-5139	0	0	13		TCGA-WB-A822	0	0	2
TCGA-CN-6010	1	1	64		TCGA-AA-3856	0	0	27		TCGA-76-4931	0	0	13		TCGA-EJ-5503	0	0	2
TCGA-CN-A498	0	0	64		TCGA-AA-A024	0	0	27		TCGA-06-0646	0	0	13		TCGA-EJ-5506	0	0	2
TCGA-75-5122	0	0	64		TCGA-CM-5863	0	0	27		TCGA-BA-A6DG	0	0	13		TCGA-EJ-A8FU	0	0	2
TCGA-95-A4VP	0	0	64		TCGA-CM-5868	0	0	27		TCGA-CN-A499	0	0	13		TCGA-G9-6367	0	0	2
TCGA-43-7658	0	0	64		TCGA-F4-6805	0	0	27		TCGA-CR-5250	0	0	13		TCGA-KK-A8I7	0	0	2
TCGA-24-2035	0	0	64		TCGA-FF-8043	0	0	27		TCGA-CR-6482	0	0	13		TCGA-XJ-A9DK	0	0	2
TCGA-BL-A5ZZ	0	0	63		TCGA-06-2559	0	0	27		TCGA-CV-6943	0	0	13		TCGA-EB-A24C	0	0	2
TCGA-BT-A2LA	0	0	63		TCGA-06-A5U1	0	0	27		TCGA-CV-7103	0	0	13		TCGA-2G-AAF1	0	0	2
TCGA-BT-A42E	0	0	63		TCGA-12-3650	0	0	27		TCGA-CV-7435	0	0	13		TCGA-2G-AAGV	0	0	2
TCGA-ZF-AA56	1	1	63		TCGA-14-1829	0	0	27		TCGA-MT-A51X	0	0	13		TCGA-2G-AAGX	0	0	2
TCGA-A2-A0CR	0	0	63		TCGA-76-4925	0	0	27		TCGA-KL-8331	0	0	13		TCGA-2G-AAGY	0	0	2
TCGA-A7-A6VX	0	0	63		TCGA-06-0190	0	0	27		TCGA-KL-8343	0	0	13		TCGA-2G-AAKM	0	0	2
TCGA-AN-A0FL	0	0	63		TCGA-06-0190	0	0	27		TCGA-KM-8441	0	0	13		TCGA-YU-A90Q	0	0	2
TCGA-VS-A9UL	0	0	63		TCGA-BB-A6UM	0	0	27		TCGA-A3-A8CQ	0	0	13		TCGA-ZM-AA0E	0	0	2
TCGA-AH-6897	0	0	63		TCGA-C9-A480	0	0	27		TCGA-AK-3465	0	0	13		TCGA-ZM-AA0F	0	0	2
TCGA-AD-6899	0	0	63		TCGA-CN-4726	0	0	27		TCGA-B0-5100	0	0	13		TCGA-2G-AALG	0	0	2
TCGA-D5-5538	0	0	63		TCGA-CN-A642	0	0	27		TCGA-BP-4961	0	0	13		TCGA-3G-AB14	0	0	2
TCGA-F4-6807	0	0	63		TCGA-CQ-A4CE	0	0	27		TCGA-BP-4971	0	0	13		TCGA-4V-A9QI	0	0	2
TCGA-F4-6809	1	1	63		TCGA-QK-A652	0	0	27		TCGA-BP-4987	0	0	13		TCGA-4V-A9QT	0	0	2
TCGA-NH-A6GC	0	0	63		TCGA-WA-A7H4	0	0	27		TCGA-BP-5174	0	0	13		TCGA-4X-A9FB	0	0	2
TCGA-IG-A51D	0	0	63		TCGA-KO-8408	0	0	27		TCGA-BP-5182	0	0	13		TCGA-X7-A8DF	0	0	2
TCGA-L5-A88W	0	0	63		TCGA-A3-3385	0	0	27		TCGA-BP-5183	0	0	13		TCGA-X7-A8DG	0	0	2
TCGA-L5-A891	1	1	63		TCGA-B0-4945	0	0	27		TCGA-CZ-5458	0	0	13		TCGA-XM-A8RH	0	0	2
TCGA-Q9-A6FU	0	0	63		TCGA-B8-5164	0	0	27		TCGA-2Z-A9JR	0	0	13		TCGA-XU-AAXW	0	0	2
TCGA-VR-A8EW	0	0	63		TCGA-B8-5551	0	0	27		TCGA-B3-A6W5	0	0	13		TCGA-XU-AAXY	0	0	2
TCGA-CN-4741	0	0	63		TCGA-B8-A54E	0	0	27		TCGA-DW-7837	0	0	13		TCGA-ZB-A96P	0	0	2
TCGA-CN-5355	0	0	63		TCGA-BP-4981	0	0	27		TCGA-MH-A855	0	0	13		TCGA-BJ-A0Z3	0	0	2
TCGA-44-7659	0	0	63		TCGA-BP-5185	0	0	27		TCGA-DD-A4NA	0	0	13		TCGA-BJ-A2N7	0	0	2
TCGA-39-5035	0	0	63		TCGA-CJ-4644	0	0	27		TCGA-ED-A82E	0	0	13		TCGA-CE-A27D	0	0	2
TCGA-52-7811	0	0	63		TCGA-CJ-6028	1	1	27		TCGA-05-4422	0	0	13		TCGA-CE-A482	0	0	2
TCGA-60-2711	0	0	63		TCGA-CZ-5463	0	0	27		TCGA-05-5429	0	0	13		TCGA-DJ-A13M	0	0	2
TCGA-77-6843	0	0	63		TCGA-CZ-5466	0	0	27		TCGA-55-6543	0	0	13		TCGA-DJ-A13O	0	0	2
TCGA-VQ-A8DU	0	0	63		TCGA-DV-A4VX	1	1	27		TCGA-78-7163	0	0	13		TCGA-DJ-A13T	0	0	2
TCGA-A5-A1OH	0	0	63		TCGA-G6-A5PC	0	0	27		TCGA-78-7540	0	0	13		TCGA-DJ-A2Q1	0	0	2
TCGA-GD-A76B	0	0	62		TCGA-5P-A9JU	1	1	27		TCGA-97-7552	0	0	13		TCGA-DJ-A3UK	0	0	2
TCGA-XF-AAMY	0	0	62		TCGA-5P-A9KA	0	0	27		TCGA-3U-A98J	0	0	13		TCGA-DJ-A3UR	0	0	2
TCGA-AC-A3W5	0	0	62		TCGA-A4-8310	0	0	27		TCGA-LK-A4O7	0	0	13		TCGA-DJ-A3US	0	0	2
TCGA-C5-A7UI	0	0	62		TCGA-A4-A5XZ	0	0	27		TCGA-SH-A9CU	0	0	13		TCGA-DJ-A3UW	0	0	2
TCGA-DS-A0VN	0	0	62		TCGA-BQ-5875	1	1	27		TCGA-UD-AAC4	0	0	13		TCGA-DJ-A3UZ	0	0	2
TCGA-EK-A2RC	0	0	62		TCGA-DW-7834	0	0	27		TCGA-UD-AAC6	0	0	13		TCGA-DJ-A3V3	0	0	2
TCGA-VS-A9UR	0	0	62		TCGA-GL-8500	0	0	27		TCGA-ZN-A9VV	1	1	13		TCGA-DJ-A3VF	0	0	2
TCGA-AF-6136	0	0	62		TCGA-GL-A59T	0	0	27		TCGA-09-2045	0	0	13		TCGA-E3-A3DZ	0	0	2
TCGA-EI-6506	0	0	62		TCGA-MH-A561	0	0	27		TCGA-25-1312	0	0	13		TCGA-E3-A3E2	0	0	2
TCGA-F5-6810	0	0	62		TCGA-MH-A562	0	0	27		TCGA-10-0926	0	0	13		TCGA-E3-A3E5	0	0	2
TCGA-A6-2674	0	0	62		TCGA-V9-A7HT	0	0	27		TCGA-10-0934	0	0	13		TCGA-E8-A413	0	0	2
TCGA-A6-2684	0	0	62		TCGA-Y8-A898	0	0	27		TCGA-3A-A9IU	0	0	13		TCGA-E8-A414	0	0	2
TCGA-AA-3975	0	0	62		TCGA-5C-AAPD	0	0	27		TCGA-F2-A44G	0	0	13		TCGA-E8-A419	0	0	2
TCGA-L5-A8NH	0	0	62		TCGA-5R-AA1C	0	0	27		TCGA-IB-A6UF	0	0	13		TCGA-E8-A434	0	0	2
TCGA-S8-A6BV	0	0	62		TCGA-CC-A9FU	1	1	27		TCGA-IB-AAUN	0	0	13		TCGA-E8-A438	0	0	2
TCGA-BA-5558	0	0	62		TCGA-DD-A1EI	0	0	27		TCGA-YB-A89D	0	0	13		TCGA-E8-A44M	0	0	2
TCGA-CV-5444	0	0	62		TCGA-DD-AACJ	0	0	27		TCGA-PR-A5PG	0	0	13		TCGA-EL-A3CW	0	0	2
TCGA-CV-7433	0	0	62		TCGA-DD-AAD5	0	0	27		TCGA-WB-A81P	0	0	13		TCGA-EL-A3CY	0	0	2
TCGA-UZ-A9PS	0	0	62		TCGA-DD-AADW	0	0	27		TCGA-2A-A8VV	1	1	13		TCGA-EL-A3GO	0	0	2
TCGA-5C-A9VG	0	0	62		TCGA-DD-AAE0	0	0	27		TCGA-2A-A8VX	0	0	13		TCGA-EL-A3TA	0	0	2
TCGA-CC-5259	0	0	62		TCGA-DD-AAVQ	0	0	27		TCGA-EJ-5531	0	0	13		TCGA-EL-A3ZS	0	0	2
TCGA-CC-A5UD	0	0	62		TCGA-DD-AAVR	0	0	27		TCGA-EJ-7314	0	0	13		TCGA-EL-A4K0	0	0	2
TCGA-DD-AADA	0	0	62		TCGA-EP-A12J	0	0	27		TCGA-EJ-7783	0	0	13		TCGA-EM-A1CW	0	0	2
TCGA-K7-A5RG	0	0	62		TCGA-RC-A7SH	0	0	27		TCGA-EJ-A46F	0	0	13		TCGA-EM-A1YD	0	0	2
TCGA-38-4628	0	0	62		TCGA-ZP-A9CZ	0	0	27		TCGA-FC-A5OB	0	0	13		TCGA-EM-A22N	0	0	2
TCGA-55-7725	0	0	62		TCGA-71-6725	0	0	27		TCGA-G9-7510	0	0	13		TCGA-EM-A22P	0	0	2
TCGA-67-3774	0	0	62		TCGA-J2-8192	0	0	27		TCGA-G9-7521	0	0	13		TCGA-EM-A2CL	0	0	2
TCGA-39-5029	0	0	62		TCGA-TS-A7P0	0	0	27		TCGA-HC-7211	0	0	13		TCGA-EM-A2CQ	0	0	2
TCGA-56-A4BY	0	0	62		TCGA-20-1685	0	0	27		TCGA-HC-7230	0	0	13		TCGA-EM-A2CU	0	0	2
TCGA-85-A4CN	0	0	62		TCGA-23-1809	0	0	27		TCGA-HC-7748	0	0	13		TCGA-EM-A3AI	0	0	2
TCGA-4E-A92E	0	0	62		TCGA-24-1413	0	0	27		TCGA-HC-7818	1	1	13		TCGA-EM-A3FK	0	0	2
TCGA-DK-A6AV	0	0	61		TCGA-24-1463	0	0	27		TCGA-HC-A6AP	0	0	13		TCGA-EM-A3FO	0	0	2
TCGA-AO-A124	0	0	61		TCGA-24-1842	0	0	27		TCGA-KK-A6E0	0	0	13		TCGA-EM-A3OB	0	0	2
TCGA-D8-A1JG	0	0	61		TCGA-24-2261	0	0	27		TCGA-KK-A8I6	0	0	13		TCGA-EM-A4FH	0	0	2
TCGA-E2-A2P6	0	0	61		TCGA-29-1762	0	0	27		TCGA-V1-A8X3	0	0	13		TCGA-ET-A2N3	0	0	2
TCGA-EW-A1OV	0	0	61		TCGA-10-0931	0	0	27		TCGA-V1-A9O5	0	0	13		TCGA-ET-A39R	0	0	2
TCGA-BI-A0VR	0	0	61		TCGA-10-0933	0	0	27		TCGA-V1-A9Z8	0	0	13		TCGA-ET-A3BO	0	0	2
TCGA-VS-A9UI	0	0	61		TCGA-2J-AAB6	0	0	27		TCGA-V1-A9ZK	0	0	13		TCGA-ET-A3BP	0	0	2
TCGA-AH-6544	0	0	61		TCGA-FB-AAQ6	0	0	27		TCGA-Y6-A8TL	0	0	13		TCGA-ET-A3BW	0	0	2
TCGA-CI-6621	0	0	61		TCGA-HV-AA8X	0	0	27		TCGA-YL-A9WI	0	0	13		TCGA-ET-A3DQ	0	0	2
TCGA-EI-6514	0	0	61		TCGA-HZ-A8P1	0	0	27		TCGA-YL-A9WK	0	0	13		TCGA-ET-A4KN	0	0	2
TCGA-4T-AA8H	0	0	61		TCGA-IB-A7M4	0	0	27		TCGA-YL-A9WL	0	0	13		TCGA-FE-A230	0	0	2
TCGA-AA-3502	0	0	61		TCGA-YY-A8LH	0	0	27		TCGA-DX-A48N	0	0	13		TCGA-FE-A23A	0	0	2
TCGA-AA-3842	0	0	61		TCGA-XJ-A9DX	0	0	27		TCGA-DX-A6YU	0	0	13		TCGA-FE-A3PA	0	0	2
TCGA-AA-3844	0	0	61		TCGA-3B-A9HS	0	0	27		TCGA-DX-A7EN	0	0	13		TCGA-FK-A3S3	0	0	2
TCGA-F4-6459	0	0	61		TCGA-DX-A3U9	0	0	27		TCGA-FX-A76Y	0	0	13		TCGA-FK-A3SE	0	0	2
TCGA-G4-6293	0	0	61		TCGA-DX-A8BX	0	0	27		TCGA-IF-A4AJ	0	0	13		TCGA-FY-A3I4	0	0	2
TCGA-L5-A4OH	0	0	61		TCGA-DX-AB37	0	0	27		TCGA-N1-A6IA	0	0	13		TCGA-FY-A3ON	0	0	2
TCGA-BA-6868	0	0	61		TCGA-PC-A5DN	0	0	27		TCGA-SI-A71O	0	0	13		TCGA-FY-A3RA	0	0	2
TCGA-CN-5364	0	0	61		TCGA-X6-A7WC	0	0	27		TCGA-X6-A8C3	0	0	13		TCGA-GE-A2C6	0	0	2
TCGA-CV-7089	0	0	61		TCGA-EB-A57M	0	0	27		TCGA-Z4-AAPG	0	0	13		TCGA-H2-A422	0	0	2
TCGA-CV-A45U	0	0	61		TCGA-B7-A5TK	0	0	27		TCGA-D3-A5GT	0	0	13		TCGA-IM-A3ED	0	0	2
TCGA-HD-A4C1	0	0	61		TCGA-2G-AAKH	0	0	27		TCGA-EB-A3XE	0	0	13		TCGA-J8-A3O2	0	0	2
TCGA-QK-A8ZA	0	0	61		TCGA-A5-A0G3	0	0	27		TCGA-4V-A9QR	0	0	13		TCGA-J8-A3YH	0	0	2
TCGA-UF-A719	0	0	61		TCGA-A5-A3LP	0	0	27		TCGA-XU-A92T	0	0	13		TCGA-J8-A3YH	0	0	2
TCGA-DD-A1EF	1	1	61		TCGA-AX-A2HK	0	0	27		TCGA-EL-A3MZ	0	0	13		TCGA-KS-A41L	0	0	2
TCGA-DD-AAD8	0	0	61		TCGA-AX-A3GI	0	0	27		TCGA-EM-A1YB	0	0	13		TCGA-KS-A4I7	0	0	2
TCGA-DD-AADI	0	0	61		TCGA-B5-A11S	0	0	27		TCGA-EM-A2P2	0	0	13		TCGA-KS-A4IC	0	0	2
TCGA-DD-AAEG	0	0	61		TCGA-B5-A11Z	0	0	27		TCGA-IM-A3U3	0	0	13		TCGA-MK-A4N9	0	0	2
TCGA-XR-A8TF	0	0	61		TCGA-B5-A1MS	0	0	27		TCGA-NF-A4WX	0	0	13		TCGA-BS-A0UT	0	0	2
TCGA-55-8615	0	0	61		TCGA-B5-A3F9	0	0	27		TCGA-AP-A1DQ	0	0	13		TCGA-VD-A8KE	0	0	2
TCGA-78-7153	0	0	61		TCGA-D1-A1NX	0	0	27		TCGA-AX-A1CJ	0	0	13		TCGA-V4-A9EX	0	0	2
TCGA-93-A4JQ	0	0	61		TCGA-EO-A3KW	0	0	27		TCGA-OR-A5J2	0	0	12		TCGA-V4-A9F0	0	0	2
TCGA-NJ-A55A	0	0	61		TCGA-EO-A3L0	0	0	27		TCGA-OR-A5KW	0	0	12		TCGA-V3-A9ZX	0	0	2
TCGA-77-7338	0	0	61		TCGA-OR-A5JE	0	0	26		TCGA-P6-A5OF	0	0	12		TCGA-VD-AA8N	0	0	2
TCGA-85-8048	0	0	61		TCGA-OR-A5LD	0	0	26		TCGA-ZF-AA5N	0	0	12		TCGA-OR-A5L5	0	0	1
TCGA-NC-A5HT	0	0	61		TCGA-CF-A47Y	0	0	26		TCGA-CS-4944	0	0	12		TCGA-XF-AAN8	0	0	1
TCGA-04-1361	0	0	61		TCGA-CF-A9FL	0	0	26		TCGA-CS-6668	0	0	12		TCGA-DB-A75P	0	0	1
TCGA-59-A5PD	0	0	61		TCGA-K4-A3WV	0	0	26		TCGA-DB-A4XA	0	0	12		TCGA-DU-6406	0	0	1
TCGA-D7-A6EX	0	0	61		TCGA-XF-AAMH	0	0	26		TCGA-DB-A4XD	0	0	12		TCGA-HT-7471	0	0	1
TCGA-RD-A8N1	0	0	61		TCGA-ZF-AA5P	0	0	26		TCGA-DB-A4XF	0	0	12		TCGA-HT-7676	0	0	1
TCGA-RD-A8N9	0	0	61		TCGA-DH-A669	1	1	26		TCGA-DH-A66B	0	0	12		TCGA-HT-7680	0	0	1
TCGA-D1-A16J	0	0	61		TCGA-DH-A66D	0	0	26		TCGA-DU-7015	0	0	12		TCGA-HT-8010	0	0	1
TCGA-DK-A1AE	0	0	60		TCGA-DU-6405	0	0	26		TCGA-DU-A7TD	0	0	12		TCGA-HT-8015	0	0	1
TCGA-FD-A43N	0	0	60		TCGA-TM-A7C4	0	0	26		TCGA-F6-A8O3	0	0	12		TCGA-HT-8107	0	0	1
TCGA-FD-A6TK	0	0	60		TCGA-A1-A0SN	0	0	26		TCGA-FG-8182	0	0	12		TCGA-P5-A5EY	0	0	1
TCGA-GV-A3JV	0	0	60		TCGA-A2-A04T	0	0	26		TCGA-FG-A713	0	0	12		TCGA-P5-A5F6	0	0	1
TCGA-AN-A0XU	0	0	60		TCGA-A2-A0CP	0	0	26		TCGA-HT-7693	0	0	12		TCGA-A2-A0YI	0	0	1
TCGA-D8-A1JK	0	0	60		TCGA-A2-A0ET	0	0	26		TCGA-HT-7694	0	0	12		TCGA-A2-A25F	0	0	1
TCGA-EA-A439	0	0	60		TCGA-A8-A0A9	0	0	26		TCGA-HT-7854	0	0	12		TCGA-LL-A440	0	0	1
TCGA-EK-A2R7	0	0	60		TCGA-AC-A62V	0	0	26		TCGA-HT-7873	0	0	12		TCGA-A4-8312	0	0	1
TCGA-AG-3893	0	0	60		TCGA-AR-A2LH	0	0	26		TCGA-HT-7874	0	0	12		TCGA-BC-A10X	0	0	1
TCGA-EI-6513	0	0	60		TCGA-BH-A0B8	0	0	26		TCGA-HT-8110	0	0	12		TCGA-DD-A3A3	0	0	1
TCGA-A6-4107	0	0	60		TCGA-BH-A0BR	0	0	26		TCGA-HT-A615	0	0	12		TCGA-77-A5FZ	0	0	1
TCGA-AA-3979	0	0	60		TCGA-BH-A0HX	0	0	26		TCGA-HT-A74J	0	0	12		TCGA-3U-A98G	0	0	1
TCGA-AA-3980	0	0	60		TCGA-BH-A18K	0	0	26		TCGA-HW-A5KL	0	0	12		TCGA-10-0928	0	0	1
TCGA-AA-3982	0	0	60		TCGA-LD-A7W5	0	0	26		TCGA-P5-A5F0	0	0	12		TCGA-3A-A9IL	0	0	1
TCGA-CM-5341	0	0	60		TCGA-LL-A5YL	0	0	26		TCGA-P5-A72Z	0	0	12		TCGA-IB-AAUV	0	0	1
TCGA-D5-5540	0	0	60		TCGA-PL-A8LV	0	0	26		TCGA-P5-A77W	0	0	12		TCGA-Q3-A5QY	0	0	1
TCGA-D5-6539	0	0	60		TCGA-C5-A1M9	0	0	26		TCGA-QH-A65V	0	0	12		TCGA-P8-A6RY	0	0	1
TCGA-D5-6922	0	0	60		TCGA-C5-A1ML	0	0	26		TCGA-QH-A65X	0	0	12		TCGA-QR-A703	0	0	1
TCGA-QG-A5Z1	0	0	60		TCGA-C5-A2LS	0	0	26		TCGA-QH-A6XC	0	0	12		TCGA-QR-A70C	0	0	1
TCGA-LN-A8HZ	0	0	60		TCGA-C5-A2M2	0	0	26		TCGA-S9-A6U5	0	0	12		TCGA-QR-A70W	0	0	1
TCGA-4P-AA8J	0	0	60		TCGA-DS-A1OA	0	0	26		TCGA-S9-A6U8	0	0	12		TCGA-RT-A6Y9	0	0	1
TCGA-BA-A4IG	0	0	60		TCGA-FU-A3TQ	0	0	26		TCGA-S9-A6WP	0	0	12		TCGA-RW-A67X	0	0	1
TCGA-CV-6441	0	0	60		TCGA-Q1-A5R1	0	0	26		TCGA-TM-A7CA	0	0	12		TCGA-RW-A68G	0	0	1
TCGA-UF-A71E	0	0	60		TCGA-VS-A8Q9	0	0	26		TCGA-TQ-A7RR	0	0	12		TCGA-S7-A7WO	0	0	1
TCGA-UF-A7JT	1	1	60		TCGA-VS-A94W	0	0	26		TCGA-VM-A8CA	0	0	12		TCGA-S7-A7WP	0	0	1
TCGA-DD-AADV	0	0	60		TCGA-ZU-A8S4	0	0	26		TCGA-A1-A0SG	0	0	12		TCGA-S7-A7WU	0	0	1
TCGA-DD-AAE3	0	0	60		TCGA-AF-6672	0	0	26		TCGA-A1-A0SM	0	0	12		TCGA-S7-A7WX	0	0	1
[truncated: 128 more rows]
