# Supplementary material for: Prognostic and therapeutic roles of SETD2 in cutaneous melanoma
Source: Aging (Albany NY). 2024 Jun 5;16(11):9692–708. doi: 10.18632/aging.205894 (PMC11210245; doi:10.18632/aging.205894)
Supplement: Supplementary Table 11 [file aging-16-205894-s012.xlsx]

## Sheet: Supplemetary Table 11
	Supplementary Table 11. The Indel neoantigens and SETD2 mutation status in TCGA-SKCM samples.
	SETD2	Indel Neoantigens			SETD2	Indel Neoantigens			SETD2	Indel Neoantigens			SETD2	Indel Neoantigens			SETD2	Indel Neoantigens
TCGA-A6-5665	Altered	6721		TCGA-FD-A43P	Unaltered	84		TCGA-CV-7091	Altered	31		TCGA-94-7557	Unaltered	8		TCGA-BT-A20X	Unaltered	1
TCGA-DI-A1BU	Altered	6324		TCGA-FD-A6TF	Unaltered	84		TCGA-H7-7774	Altered	31		TCGA-3H-AB3X	Unaltered	8		TCGA-BT-A2LA	Unaltered	1
TCGA-AD-6889	Altered	5745		TCGA-HT-8113	Unaltered	84		TCGA-HD-7753	Unaltered	31		TCGA-3U-A98E	Unaltered	8		TCGA-BT-A3PH	Unaltered	1
TCGA-WS-AB45	Altered	5367		TCGA-C5-A1MQ	Unaltered	84		TCGA-AK-3465	Unaltered	31		TCGA-TS-A7P1	Unaltered	8		TCGA-CU-A3KJ	Unaltered	1
TCGA-AZ-6598	Altered	5272		TCGA-DM-A1D4	Unaltered	84		TCGA-B8-5159	Unaltered	31		TCGA-2J-AABI	Unaltered	8		TCGA-E7-A8O7	Unaltered	1
TCGA-AA-3492	Unaltered	5185		TCGA-CN-4737	Unaltered	84		TCGA-CJ-4882	Altered	31		TCGA-3A-A9I5	Unaltered	8		TCGA-FD-A3SQ	Unaltered	1
TCGA-NH-A5IV	Unaltered	4885		TCGA-CV-7422	Unaltered	84		TCGA-CJ-4918	Unaltered	31		TCGA-HV-A5A4	Unaltered	8		TCGA-FD-A43U	Unaltered	1
TCGA-D5-6530	Unaltered	4526		TCGA-CZ-5463	Unaltered	84		TCGA-CZ-5453	Unaltered	31		TCGA-LB-A8F3	Unaltered	8		TCGA-FD-A6TA	Unaltered	1
TCGA-BG-A222	Unaltered	4388		TCGA-2Z-A9JS	Unaltered	84		TCGA-CZ-5989	Unaltered	31		TCGA-RB-A7B8	Altered	8		TCGA-FD-A6TH	Unaltered	1
TCGA-AD-A5EJ	Unaltered	4125		TCGA-DD-AADQ	Unaltered	84		TCGA-A4-7288	Unaltered	31		TCGA-YB-A89D	Unaltered	8		TCGA-G2-A2EK	Unaltered	1
TCGA-B5-A1MX	Altered	3683		TCGA-64-1677	Unaltered	84		TCGA-WX-AA47	Unaltered	31		TCGA-WB-A80Y	Unaltered	8		TCGA-GV-A3QG	Unaltered	1
TCGA-5M-AAT6	Unaltered	3657		TCGA-63-A5MH	Unaltered	84		TCGA-99-AA5R	Unaltered	31		TCGA-CH-5772	Unaltered	8		TCGA-LT-A5Z6	Unaltered	1
TCGA-AJ-A3BH	Unaltered	3607		TCGA-85-8277	Unaltered	84		TCGA-MP-A4TF	Unaltered	31		TCGA-V1-A8MU	Unaltered	8		TCGA-XF-A9SI	Unaltered	1
TCGA-AX-A2HA	Unaltered	3593		TCGA-S6-A8JY	Unaltered	84		TCGA-52-7812	Unaltered	31		TCGA-VP-A87H	Unaltered	8		TCGA-XF-A9SW	Unaltered	1
TCGA-G4-6588	Unaltered	3549		TCGA-DB-A64X	Unaltered	83		TCGA-77-7142	Unaltered	31		TCGA-ZG-A9LM	Unaltered	8		TCGA-XF-AAMW	Unaltered	1
TCGA-DF-A2KN	Altered	3380		TCGA-AR-A2LE	Unaltered	83		TCGA-CH-5744	Unaltered	31		TCGA-ZG-A9NI	Altered	8		TCGA-XF-AAMZ	Unaltered	1
TCGA-AU-6004	Unaltered	3376		TCGA-B6-A0RL	Unaltered	83		TCGA-EJ-5517	Unaltered	31		TCGA-DX-A3LY	Unaltered	8		TCGA-ZF-AA4U	Unaltered	1
TCGA-AA-A02R	Unaltered	3209		TCGA-B6-A0WT	Unaltered	83		TCGA-EL-A3T9	Unaltered	31		TCGA-DX-A48L	Unaltered	8		TCGA-ZF-AA56	Altered	1
TCGA-DM-A1HB	Unaltered	3188		TCGA-AZ-6605	Unaltered	83		TCGA-AX-A1CA	Unaltered	31		TCGA-DX-A6Z0	Unaltered	8		TCGA-ZF-AA5H	Unaltered	1
TCGA-D5-6540	Altered	3125		TCGA-CN-6995	Unaltered	83		TCGA-DF-A2KS	Unaltered	31		TCGA-DX-A7EM	Unaltered	8		TCGA-CS-5390	Unaltered	1
TCGA-B5-A5OC	Unaltered	3058		TCGA-CN-A6V3	Unaltered	83		TCGA-EO-A3AY	Altered	31		TCGA-IW-A3M5	Unaltered	8		TCGA-CS-5396	Unaltered	1
TCGA-AX-A0J1	Altered	2991		TCGA-CJ-4641	Unaltered	83		TCGA-FI-A2EX	Unaltered	31		TCGA-KD-A5QT	Altered	8		TCGA-DH-5142	Unaltered	1
TCGA-AA-3821	Unaltered	2880		TCGA-DD-AAEA	Unaltered	83		TCGA-PG-A915	Unaltered	31		TCGA-D9-A4Z3	Altered	8		TCGA-DH-5143	Unaltered	1
TCGA-A6-5661	Altered	2787		TCGA-97-7553	Unaltered	83		TCGA-DK-AA77	Unaltered	30		TCGA-EB-A57M	Unaltered	8		TCGA-DU-8161	Unaltered	1
TCGA-AY-6197	Unaltered	2721		TCGA-22-4601	Unaltered	83		TCGA-XF-A8HF	Unaltered	30		TCGA-XY-A9T9	Unaltered	8		TCGA-DU-A5TT	Unaltered	1
TCGA-CK-4951	Altered	2711		TCGA-37-3783	Unaltered	83		TCGA-QH-A86X	Unaltered	30		TCGA-DJ-A1QN	Unaltered	8		TCGA-DU-A6S2	Unaltered	1
TCGA-F4-6570	Unaltered	2706		TCGA-39-5016	Unaltered	83		TCGA-AC-A23E	Unaltered	30		TCGA-ET-A40S	Unaltered	8		TCGA-DU-A76O	Unaltered	1
TCGA-AA-3713	Unaltered	2674		TCGA-46-3769	Unaltered	83		TCGA-AR-A0TS	Unaltered	30		TCGA-FE-A230	Unaltered	8		TCGA-DU-A7TB	Unaltered	1
TCGA-CK-5916	Unaltered	2625		TCGA-66-2795	Unaltered	83		TCGA-AR-A0U4	Unaltered	30		TCGA-N6-A4VE	Unaltered	8		TCGA-DU-A7TG	Unaltered	1
TCGA-A6-2686	Unaltered	2617		TCGA-SC-A6LQ	Unaltered	83		TCGA-C8-A12Y	Unaltered	30		TCGA-A5-A0GM	Unaltered	8		TCGA-E1-A7YH	Unaltered	1
TCGA-AA-3663	Unaltered	2607		TCGA-J4-AATZ	Unaltered	83		TCGA-D8-A1XB	Unaltered	30		TCGA-AJ-A3TW	Unaltered	8		TCGA-E1-A7YK	Altered	1
TCGA-FI-A2F4	Unaltered	2577		TCGA-FY-A3R9	Unaltered	83		TCGA-E9-A1NA	Unaltered	30		TCGA-AP-A0L8	Unaltered	8		TCGA-E1-A7YO	Unaltered	1
TCGA-EO-A3KX	Altered	2549		TCGA-4Z-AA84	Altered	82		TCGA-GM-A3XL	Unaltered	30		TCGA-B5-A1MS	Unaltered	8		TCGA-E1-A7YY	Unaltered	1
TCGA-EA-A410	Altered	2473		TCGA-FD-A5BV	Unaltered	82		TCGA-ZJ-AB0I	Unaltered	30		TCGA-B5-A1MV	Unaltered	8		TCGA-FG-6689	Unaltered	1
TCGA-EY-A215	Altered	2407		TCGA-A8-A07E	Unaltered	82		TCGA-AG-A015	Altered	30		TCGA-BG-A0MU	Unaltered	8		TCGA-FG-7637	Unaltered	1
TCGA-AA-3811	Unaltered	2385		TCGA-AN-A0AT	Unaltered	82		TCGA-3L-AA1B	Unaltered	30		TCGA-BG-A186	Unaltered	8		TCGA-FG-8187	Unaltered	1
TCGA-AA-3877	Unaltered	2382		TCGA-E2-A1IL	Unaltered	82		TCGA-AY-A54L	Unaltered	30		TCGA-BG-A18C	Unaltered	8		TCGA-FG-A6J3	Altered	1
TCGA-D1-A17H	Unaltered	2381		TCGA-AA-3856	Unaltered	82		TCGA-AY-A71X	Unaltered	30		TCGA-D1-A16Q	Unaltered	8		TCGA-HT-7469	Unaltered	1
TCGA-F7-A624	Unaltered	2357		TCGA-CR-7398	Unaltered	82		TCGA-KM-8438	Altered	30		TCGA-DI-A1C3	Unaltered	8		TCGA-HT-7473	Altered	1
TCGA-AP-A1DR	Unaltered	2337		TCGA-G6-A8L7	Unaltered	82		TCGA-BP-4962	Unaltered	30		TCGA-QS-A744	Unaltered	8		TCGA-HT-7476	Unaltered	1
TCGA-B5-A11H	Unaltered	2297		TCGA-MH-A55W	Unaltered	82		TCGA-CW-6093	Unaltered	30		TCGA-VD-A8KK	Unaltered	8		TCGA-HT-7480	Unaltered	1
TCGA-AX-A3FS	Unaltered	2284		TCGA-SX-A71V	Unaltered	82		TCGA-A4-7996	Unaltered	30		TCGA-4Z-AA7Q	Unaltered	7		TCGA-HT-7481	Unaltered	1
TCGA-G4-6628	Unaltered	2198		TCGA-78-7542	Unaltered	82		TCGA-A4-7997	Unaltered	30		TCGA-BT-A20W	Unaltered	7		TCGA-HT-7607	Unaltered	1
TCGA-F4-6856	Unaltered	2164		TCGA-60-2714	Unaltered	82		TCGA-MH-A55Z	Unaltered	30		TCGA-DK-A1A3	Altered	7		TCGA-HT-7608	Unaltered	1
TCGA-AX-A3FT	Unaltered	2144		TCGA-66-2744	Unaltered	82		TCGA-DD-A11A	Unaltered	30		TCGA-DK-A2I4	Unaltered	7		TCGA-HT-7689	Unaltered	1
TCGA-EO-A22T	Unaltered	2121		TCGA-CU-A3QU	Unaltered	81		TCGA-44-7662	Unaltered	30		TCGA-DK-A6AV	Unaltered	7		TCGA-HT-7858	Unaltered	1
TCGA-EI-6882	Unaltered	2100		TCGA-K4-A6FZ	Unaltered	81		TCGA-55-6982	Unaltered	30		TCGA-DK-A6B0	Unaltered	7		TCGA-HT-8010	Unaltered	1
TCGA-AD-6895	Unaltered	2075		TCGA-S5-AA26	Unaltered	81		TCGA-67-6216	Altered	30		TCGA-FD-A3B4	Unaltered	7		TCGA-HT-8109	Unaltered	1
TCGA-AD-5900	Altered	2068		TCGA-ZF-AA4N	Unaltered	81		TCGA-78-7148	Unaltered	30		TCGA-FJ-A3Z7	Unaltered	7		TCGA-HT-8111	Unaltered	1
TCGA-G4-6302	Unaltered	2041		TCGA-DB-5277	Unaltered	81		TCGA-33-AASL	Altered	30		TCGA-G2-AA3D	Unaltered	7		TCGA-HT-8114	Unaltered	1
TCGA-BS-A0TJ	Unaltered	2016		TCGA-E2-A1IF	Unaltered	81		TCGA-HZ-A8P0	Unaltered	30		TCGA-UY-A78M	Unaltered	7		TCGA-HT-A5RA	Unaltered	1
TCGA-KK-A59V	Unaltered	1999		TCGA-OL-A5RZ	Unaltered	81		TCGA-IB-A7M4	Unaltered	30		TCGA-UY-A9PE	Altered	7		TCGA-HT-A61C	Unaltered	1
TCGA-QG-A5Z2	Altered	1981		TCGA-CQ-7071	Unaltered	81		TCGA-EJ-7330	Unaltered	30		TCGA-XF-A8HD	Unaltered	7		TCGA-HW-8321	Unaltered	1
TCGA-G4-6586	Unaltered	1979		TCGA-QK-A8Z7	Unaltered	81		TCGA-KK-A8IA	Unaltered	30		TCGA-XF-A9SK	Unaltered	7		TCGA-HW-A5KL	Unaltered	1
TCGA-DI-A0WH	Unaltered	1933		TCGA-A3-3347	Unaltered	81		TCGA-YL-A9WI	Unaltered	30		TCGA-CS-5393	Unaltered	7		TCGA-KT-A7W1	Unaltered	1
TCGA-E6-A2P9	Unaltered	1877		TCGA-BP-5195	Unaltered	81		TCGA-GN-A26C	Altered	30		TCGA-DB-A75K	Unaltered	7		TCGA-P5-A5ET	Unaltered	1
TCGA-AJ-A3BG	Unaltered	1872		TCGA-DW-7840	Unaltered	81		TCGA-ZB-A96L	Unaltered	30		TCGA-DU-6396	Altered	7		TCGA-P5-A5EW	Unaltered	1
TCGA-D5-6928	Unaltered	1870		TCGA-55-8615	Unaltered	81		TCGA-DJ-A3V0	Unaltered	30		TCGA-HT-7686	Unaltered	7		TCGA-P5-A5F2	Unaltered	1
TCGA-D5-6930	Unaltered	1864		TCGA-86-8668	Unaltered	81		TCGA-FY-A3YR	Unaltered	30		TCGA-A2-A1FW	Unaltered	7		TCGA-P5-A731	Unaltered	1
TCGA-AA-3715	Unaltered	1845		TCGA-66-2767	Unaltered	81		TCGA-N9-A4Q8	Unaltered	30		TCGA-A7-A13G	Unaltered	7		TCGA-P5-A737	Unaltered	1
TCGA-EO-A22S	Unaltered	1843		TCGA-77-8144	Unaltered	81		TCGA-D1-A1O5	Unaltered	30		TCGA-A8-A093	Unaltered	7		TCGA-QH-A6X3	Unaltered	1
TCGA-AX-A2HD	Altered	1835		TCGA-94-A4VJ	Unaltered	81		TCGA-EY-A1GT	Unaltered	30		TCGA-AC-A5EH	Unaltered	7		TCGA-QH-A6X8	Unaltered	1
TCGA-A6-6653	Altered	1794		TCGA-M7-A724	Unaltered	81		TCGA-XF-AAMT	Unaltered	29		TCGA-AN-A0AM	Unaltered	7		TCGA-S9-A6WO	Unaltered	1
TCGA-AX-A3G8	Unaltered	1773		TCGA-3S-AAYX	Unaltered	81		TCGA-ZF-A9RF	Unaltered	29		TCGA-B6-A401	Unaltered	7		TCGA-S9-A7QX	Unaltered	1
TCGA-B5-A0JZ	Unaltered	1736		TCGA-2F-A9KT	Unaltered	80		TCGA-DU-7302	Unaltered	29		TCGA-BH-A0B8	Unaltered	7		TCGA-S9-A7R1	Unaltered	1
TCGA-BG-A2L7	Unaltered	1680		TCGA-E1-A7YV	Unaltered	80		TCGA-S9-A6WL	Unaltered	29		TCGA-BH-A0DT	Unaltered	7		TCGA-TQ-A7RJ	Unaltered	1
TCGA-D1-A1NZ	Unaltered	1671		TCGA-E2-A1BD	Unaltered	80		TCGA-A7-A0CJ	Unaltered	29		TCGA-BH-A0RX	Unaltered	7		TCGA-VM-A8CD	Unaltered	1
TCGA-CM-5861	Altered	1668		TCGA-GS-A9TT	Altered	80		TCGA-A7-A5ZW	Unaltered	29		TCGA-C8-A1HK	Unaltered	7		TCGA-VW-A8FI	Unaltered	1
TCGA-AP-A1E1	Unaltered	1668		TCGA-CN-5363	Unaltered	80		TCGA-A8-A06Q	Unaltered	29		TCGA-C8-A1HN	Unaltered	7		TCGA-5L-AAT0	Unaltered	1
TCGA-AP-A054	Unaltered	1599		TCGA-A3-3358	Altered	80		TCGA-AN-A0AR	Unaltered	29		TCGA-E2-A15C	Unaltered	7		TCGA-A1-A0SB	Unaltered	1
TCGA-VS-A94Z	Unaltered	1597		TCGA-A4-8515	Unaltered	80		TCGA-E2-A15D	Unaltered	29		TCGA-E2-A15F	Unaltered	7		TCGA-A1-A0SD	Unaltered	1
TCGA-AX-A063	Unaltered	1591		TCGA-DD-AADM	Unaltered	80		TCGA-EW-A1PE	Unaltered	29		TCGA-E2-A15H	Unaltered	7		TCGA-A2-A04U	Unaltered	1
TCGA-AA-3833	Unaltered	1583		TCGA-05-4426	Unaltered	80		TCGA-EK-A2R8	Unaltered	29		TCGA-E9-A1NE	Unaltered	7		TCGA-A2-A0ER	Unaltered	1
TCGA-EW-A1IZ	Unaltered	1578		TCGA-55-7913	Unaltered	80		TCGA-HG-A2PA	Unaltered	29		TCGA-E9-A1NI	Unaltered	7		TCGA-A2-A0YG	Unaltered	1
TCGA-55-8506	Unaltered	1563		TCGA-91-A4BC	Unaltered	80		TCGA-VS-A9V2	Unaltered	29		TCGA-E9-A1QZ	Unaltered	7		TCGA-A2-A0YJ	Unaltered	1
TCGA-BS-A0TA	Unaltered	1559		TCGA-46-6025	Unaltered	80		TCGA-AY-A69D	Altered	29		TCGA-EW-A1P3	Unaltered	7		TCGA-A2-A0YL	Unaltered	1
TCGA-EI-6507	Unaltered	1552		TCGA-90-A4ED	Unaltered	80		TCGA-AZ-4614	Unaltered	29		TCGA-OL-A5D7	Unaltered	7		TCGA-A2-A4S2	Unaltered	1
TCGA-A6-6780	Unaltered	1549		TCGA-DX-A1KU	Unaltered	80		TCGA-76-4929	Unaltered	29		TCGA-OL-A5S0	Unaltered	7		TCGA-A7-A0DB	Unaltered	1
TCGA-BK-A13B	Unaltered	1548		TCGA-2G-AAFV	Unaltered	80		TCGA-CV-7242	Unaltered	29		TCGA-S3-AA15	Unaltered	7		TCGA-A7-A3RF	Unaltered	1
TCGA-D5-6927	Unaltered	1536		TCGA-AJ-A3QS	Unaltered	80		TCGA-DQ-5631	Unaltered	29		TCGA-C5-A1BM	Unaltered	7		TCGA-A8-A07G	Unaltered	1
TCGA-86-A4JF	Unaltered	1528		TCGA-OR-A5K0	Unaltered	79		TCGA-UF-A71B	Unaltered	29		TCGA-C5-A2LS	Unaltered	7		TCGA-A8-A08B	Unaltered	1
TCGA-A6-6781	Unaltered	1516		TCGA-2F-A9KO	Unaltered	79		TCGA-A3-3376	Unaltered	29		TCGA-C5-A7UI	Unaltered	7		TCGA-A8-A08Z	Unaltered	1
TCGA-AX-A3G9	Unaltered	1501		TCGA-FD-A3SS	Unaltered	79		TCGA-A4-7584	Unaltered	29		TCGA-EA-A43B	Unaltered	7		TCGA-A8-A09N	Unaltered	1
TCGA-AD-6964	Unaltered	1497		TCGA-SY-A9G5	Altered	79		TCGA-UZ-A9PP	Unaltered	29		TCGA-FU-A3NI	Unaltered	7		TCGA-A8-A0A2	Unaltered	1
TCGA-B5-A0K9	Unaltered	1474		TCGA-DU-6393	Unaltered	79		TCGA-DD-A11B	Unaltered	29		TCGA-VS-A94X	Unaltered	7		TCGA-A8-A0AD	Unaltered	1
TCGA-EY-A1GU	Altered	1425		TCGA-A8-A08H	Unaltered	79		TCGA-80-5607	Altered	29		TCGA-VS-A9UP	Unaltered	7		TCGA-AC-A8OQ	Unaltered	1
TCGA-AX-A2HG	Unaltered	1412		TCGA-AH-6644	Unaltered	79		TCGA-97-8547	Unaltered	29		TCGA-VS-A9V4	Unaltered	7		TCGA-AN-A03Y	Unaltered	1
TCGA-AX-A1C4	Unaltered	1408		TCGA-AA-3989	Unaltered	79		TCGA-56-8626	Unaltered	29		TCGA-3X-AAVC	Unaltered	7		TCGA-AN-A0XP	Unaltered	1
TCGA-AX-A06H	Unaltered	1404		TCGA-Y8-A898	Unaltered	79		TCGA-KC-A7F5	Unaltered	29		TCGA-F5-6571	Unaltered	7		TCGA-AN-A0XW	Unaltered	1
TCGA-AX-A2HC	Altered	1399		TCGA-4B-A93V	Unaltered	79		TCGA-DX-A7EQ	Unaltered	29		TCGA-A6-2675	Unaltered	7		TCGA-AO-A03V	Unaltered	1
TCGA-G4-6304	Unaltered	1395		TCGA-50-5930	Unaltered	79		TCGA-D1-A161	Unaltered	29		TCGA-AY-4070	Unaltered	7		TCGA-AO-A0J7	Unaltered	1
TCGA-AA-3966	Altered	1383		TCGA-91-6829	Unaltered	79		TCGA-E7-A6MD	Unaltered	28		TCGA-CM-6165	Unaltered	7		TCGA-AO-A0JF	Unaltered	1
TCGA-SL-A6JA	Unaltered	1377		TCGA-66-2789	Unaltered	79		TCGA-FD-A6TK	Unaltered	28		TCGA-D5-6929	Unaltered	7		TCGA-AQ-A0Y5	Unaltered	1
TCGA-CK-6746	Unaltered	1375		TCGA-96-A4JL	Unaltered	79		TCGA-LC-A66R	Unaltered	28		TCGA-27-1831	Unaltered	7		TCGA-AR-A0U2	Unaltered	1
TCGA-AZ-4615	Unaltered	1371		TCGA-DK-A1AD	Unaltered	78		TCGA-DU-A7TC	Unaltered	28		TCGA-76-4928	Unaltered	7		TCGA-AR-A1AL	Unaltered	1
TCGA-FI-A2D6	Unaltered	1366		TCGA-FD-A6TG	Unaltered	78		TCGA-P5-A77X	Unaltered	28		TCGA-CN-4725	Unaltered	7		TCGA-AR-A1AX	Unaltered	1
TCGA-AJ-A8CW	Unaltered	1360		TCGA-DU-A6S8	Unaltered	78		TCGA-S9-A6TZ	Unaltered	28		TCGA-CN-4728	Unaltered	7		TCGA-AR-A24N	Unaltered	1
TCGA-CK-5913	Altered	1359		TCGA-FG-A6IZ	Unaltered	78		TCGA-S9-A6UB	Unaltered	28		TCGA-CQ-A4CI	Unaltered	7		TCGA-AR-A2LH	Unaltered	1
TCGA-D1-A2G0	Altered	1358		TCGA-AO-A0J2	Unaltered	78		TCGA-A2-A0EU	Unaltered	28		TCGA-CV-7253	Unaltered	7		TCGA-B6-A0I2	Unaltered	1
TCGA-AJ-A3OJ	Unaltered	1357		TCGA-D8-A1XJ	Unaltered	78		TCGA-E2-A15G	Unaltered	28		TCGA-P3-A6SW	Unaltered	7		TCGA-B6-A409	Unaltered	1
TCGA-BH-A18G	Unaltered	1345		TCGA-D5-6920	Unaltered	78		TCGA-E2-A1LK	Unaltered	28		TCGA-KN-8432	Unaltered	7		TCGA-BH-A0B7	Unaltered	1
TCGA-EY-A5W2	Unaltered	1344		TCGA-CN-6011	Unaltered	78		TCGA-E9-A1NH	Unaltered	28		TCGA-KN-8435	Unaltered	7		TCGA-BH-A0BD	Unaltered	1
TCGA-B5-A3FA	Altered	1335		TCGA-CV-7406	Unaltered	78		TCGA-EW-A6SD	Unaltered	28		TCGA-KO-8411	Unaltered	7		TCGA-BH-A0BF	Unaltered	1
TCGA-PG-A917	Altered	1334		TCGA-D6-6825	Unaltered	78		TCGA-S3-AA11	Altered	28		TCGA-A3-A8CQ	Unaltered	7		TCGA-BH-A0BS	Unaltered	1
TCGA-21-1080	Altered	1326		TCGA-CJ-5681	Altered	78		TCGA-EK-A3GM	Unaltered	28		TCGA-B0-5097	Unaltered	7		TCGA-BH-A0DO	Unaltered	1
TCGA-DF-A2KZ	Unaltered	1325		TCGA-DD-A1EB	Unaltered	78		TCGA-VS-A94Y	Altered	28		TCGA-B0-5691	Unaltered	7		TCGA-BH-A0E0	Unaltered	1
TCGA-D1-A101	Unaltered	1271		TCGA-49-AARQ	Unaltered	78		TCGA-4G-AAZO	Unaltered	28		TCGA-CW-6097	Unaltered	7		TCGA-BH-A0H3	Unaltered	1
TCGA-AX-A060	Unaltered	1270		TCGA-55-7281	Unaltered	78		TCGA-AG-4001	Unaltered	28		TCGA-CZ-5460	Altered	7		TCGA-BH-A0H9	Unaltered	1
TCGA-EO-A3AU	Unaltered	1269		TCGA-55-8301	Altered	78		TCGA-DC-4745	Unaltered	28		TCGA-DV-5566	Unaltered	7		TCGA-BH-A0HP	Unaltered	1
TCGA-CM-6171	Unaltered	1263		TCGA-O1-A52J	Unaltered	78		TCGA-F5-6861	Unaltered	28		TCGA-B9-7268	Unaltered	7		TCGA-BH-A0HY	Unaltered	1
TCGA-BG-A3EW	Unaltered	1262		TCGA-63-A5MR	Unaltered	78		TCGA-DM-A280	Unaltered	28		TCGA-BQ-5882	Unaltered	7		TCGA-BH-A0W4	Unaltered	1
TCGA-G4-6309	Unaltered	1246		TCGA-BT-A20J	Unaltered	77		TCGA-DM-A28H	Unaltered	28		TCGA-PJ-A5Z9	Unaltered	7		TCGA-BH-A18K	Unaltered	1
TCGA-BG-A0LX	Unaltered	1234		TCGA-BT-A42C	Unaltered	77		TCGA-CR-6471	Unaltered	28		TCGA-BW-A5NP	Unaltered	7		TCGA-C8-A132	Unaltered	1
TCGA-D1-A0ZO	Unaltered	1214		TCGA-E1-A7YM	Altered	77		TCGA-CV-5444	Unaltered	28		TCGA-CC-5259	Unaltered	7		TCGA-C8-A138	Unaltered	1
TCGA-EY-A549	Unaltered	1199		TCGA-P5-A72Z	Unaltered	77		TCGA-D6-6516	Unaltered	28		TCGA-DD-A113	Unaltered	7		TCGA-C8-A1HL	Unaltered	1
TCGA-CM-4743	Unaltered	1191		TCGA-AC-A8OR	Unaltered	77		TCGA-TN-A7HJ	Unaltered	28		TCGA-DD-A4NE	Unaltered	7		TCGA-C8-A275	Unaltered	1
TCGA-CM-6674	Unaltered	1171		TCGA-BH-A0BA	Unaltered	77		TCGA-A3-3319	Unaltered	28		TCGA-DD-AAW1	Unaltered	7		TCGA-D8-A1JM	Unaltered	1
TCGA-63-A5MM	Unaltered	1171		TCGA-AA-A02Y	Unaltered	77		TCGA-B0-5083	Unaltered	28		TCGA-ED-A7PZ	Unaltered	7		TCGA-D8-A1X5	Unaltered	1
TCGA-EY-A2OP	Altered	1155		TCGA-06-5415	Unaltered	77		TCGA-B4-5844	Unaltered	28		TCGA-FV-A23B	Unaltered	7		TCGA-D8-A1XS	Unaltered	1
TCGA-CM-4746	Unaltered	1146		TCGA-28-5218	Altered	77		TCGA-CZ-5452	Unaltered	28		TCGA-G3-A3CH	Unaltered	7		TCGA-D8-A1Y3	Unaltered	1
TCGA-AJ-A3EK	Altered	1146		TCGA-CX-7086	Unaltered	77		TCGA-2K-A9WE	Unaltered	28		TCGA-G3-A5SM	Unaltered	7		TCGA-D8-A27L	Unaltered	1
TCGA-EY-A548	Unaltered	1126		TCGA-64-5779	Unaltered	77		TCGA-BQ-7050	Unaltered	28		TCGA-YA-A8S7	Altered	7		TCGA-D8-A27T	Unaltered	1
TCGA-CM-6162	Unaltered	1110		TCGA-95-A4VP	Unaltered	77		TCGA-DD-AAE0	Unaltered	28		TCGA-ZP-A9CZ	Unaltered	7		TCGA-E2-A108	Unaltered	1
TCGA-EO-A3AZ	Unaltered	1110		TCGA-J2-A4AE	Unaltered	77		TCGA-DD-AAEI	Unaltered	28		TCGA-44-6774	Unaltered	7		TCGA-E2-A15R	Unaltered	1
TCGA-A5-A0VQ	Unaltered	1085		TCGA-NC-A5HM	Altered	77		TCGA-ED-A97K	Unaltered	28		TCGA-55-6981	Unaltered	7		TCGA-E2-A1AZ	Unaltered	1
TCGA-BG-A0VZ	Unaltered	1082		TCGA-BJ-A3EZ	Unaltered	77		TCGA-86-8281	Unaltered	28		TCGA-62-8399	Unaltered	7		TCGA-E2-A1B5	Unaltered	1
TCGA-4R-AA8I	Unaltered	1081		TCGA-UY-A78O	Unaltered	76		TCGA-S2-AA1A	Unaltered	28		TCGA-73-7499	Unaltered	7		TCGA-E2-A1BC	Unaltered	1
TCGA-G4-6320	Unaltered	1071		TCGA-FN-7833	Unaltered	76		TCGA-TK-A8OK	Unaltered	28		TCGA-78-8655	Unaltered	7		TCGA-E2-A1IJ	Unaltered	1
TCGA-D1-A17M	Unaltered	1049		TCGA-D8-A1JK	Unaltered	76		TCGA-2G-AAKH	Unaltered	28		TCGA-J2-8192	Unaltered	7		TCGA-E2-A1L7	Unaltered	1
TCGA-E6-A2P8	Altered	1045		TCGA-LL-A6FP	Unaltered	76		TCGA-EM-A2CN	Unaltered	28		TCGA-34-2600	Altered	7		TCGA-E2-A56Z	Unaltered	1
TCGA-2W-A8YY	Altered	1039		TCGA-F5-6702	Unaltered	76		TCGA-N5-A4RD	Unaltered	28		TCGA-63-A5MT	Unaltered	7		TCGA-E9-A1NF	Unaltered	1
TCGA-D1-A16F	Unaltered	1013		TCGA-AA-3684	Unaltered	76		TCGA-ND-A4W6	Unaltered	28		TCGA-66-2778	Unaltered	7		TCGA-E9-A1RB	Unaltered	1
TCGA-AN-A0AK	Unaltered	990		TCGA-AD-6901	Unaltered	76		TCGA-AX-A1C9	Unaltered	28		TCGA-85-8666	Unaltered	7		TCGA-E9-A1RD	Unaltered	1
TCGA-QQ-A8VF	Altered	981		TCGA-CZ-5468	Unaltered	76		TCGA-D1-A0ZQ	Unaltered	28		TCGA-94-7943	Unaltered	7		TCGA-E9-A1RG	Unaltered	1
TCGA-A5-A2K7	Unaltered	981		TCGA-DV-A4VX	Altered	76		TCGA-DI-A1BY	Unaltered	28		TCGA-98-8020	Unaltered	7		TCGA-E9-A1RI	Unaltered	1
TCGA-AA-3950	Unaltered	971		TCGA-2Z-A9JK	Unaltered	76		TCGA-EY-A1GI	Altered	28		TCGA-SH-A9CU	Unaltered	7		TCGA-E9-A227	Unaltered	1
TCGA-AM-5821	Altered	971		TCGA-85-7950	Unaltered	76		TCGA-FI-A2EW	Unaltered	28		TCGA-HV-A5A3	Unaltered	7		TCGA-E9-A229	Unaltered	1
TCGA-N7-A4Y0	Unaltered	965		TCGA-LA-A446	Unaltered	76		TCGA-C4-A0EZ	Unaltered	27		TCGA-XN-A8T3	Unaltered	7		TCGA-E9-A22D	Unaltered	1
TCGA-BG-A18B	Unaltered	943		TCGA-BT-A20T	Unaltered	75		TCGA-CF-A47X	Unaltered	27		TCGA-2A-A8W3	Unaltered	7		TCGA-E9-A245	Unaltered	1
TCGA-CR-7402	Unaltered	928		TCGA-AO-A0J4	Unaltered	75		TCGA-K4-A5RI	Unaltered	27		TCGA-EJ-7797	Unaltered	7		TCGA-EW-A1IY	Unaltered	1
TCGA-AA-A01P	Unaltered	908		TCGA-BH-A202	Unaltered	75		TCGA-UY-A9PF	Altered	27		TCGA-HC-8213	Unaltered	7		TCGA-EW-A1P4	Unaltered	1
TCGA-D1-A1O7	Unaltered	900		TCGA-E9-A2JS	Unaltered	75		TCGA-XF-A9SX	Unaltered	27		TCGA-KC-A7FA	Unaltered	7		TCGA-LL-A9Q3	Unaltered	1
TCGA-EY-A1H0	Unaltered	866		TCGA-GM-A2DB	Unaltered	75		TCGA-DU-A76R	Unaltered	27		TCGA-M7-A71Z	Unaltered	7		TCGA-OL-A6VQ	Unaltered	1
TCGA-95-7043	Unaltered	864		TCGA-EI-6510	Altered	75		TCGA-AN-A0FJ	Unaltered	27		TCGA-M7-A722	Unaltered	7		TCGA-OL-A6VR	Unaltered	1
TCGA-BS-A0U8	Unaltered	856		TCGA-EI-6512	Unaltered	75		TCGA-AN-A0XV	Unaltered	27		TCGA-VN-A88P	Altered	7		TCGA-S3-AA14	Unaltered	1
TCGA-95-7039	Unaltered	850		TCGA-AA-A00Z	Unaltered	75		TCGA-BH-A18R	Unaltered	27		TCGA-YJ-A8SW	Unaltered	7		TCGA-W8-A86G	Unaltered	1
TCGA-BS-A0TE	Unaltered	846		TCGA-06-0686	Unaltered	75		TCGA-D8-A1JH	Unaltered	27		TCGA-DX-A2IZ	Unaltered	7		TCGA-C5-A1BN	Altered	1
TCGA-DU-6392	Altered	843		TCGA-CV-A45W	Unaltered	75		TCGA-C5-A7CG	Unaltered	27		TCGA-BF-A3DM	Unaltered	7		TCGA-C5-A1M9	Unaltered	1
TCGA-HT-8564	Unaltered	843		TCGA-IQ-A61E	Unaltered	75		TCGA-W5-AA2U	Unaltered	27		TCGA-EB-A3Y6	Unaltered	7		TCGA-C5-A1MK	Unaltered	1
TCGA-FI-A2D0	Unaltered	836		TCGA-DV-5565	Unaltered	75		TCGA-ZH-A8Y2	Unaltered	27		TCGA-EB-A4P0	Unaltered	7		TCGA-C5-A1MN	Unaltered	1
TCGA-AP-A05N	Unaltered	832		TCGA-A4-A48D	Unaltered	75		TCGA-A6-6652	Unaltered	27		TCGA-2G-AAGC	Unaltered	7		TCGA-DG-A2KL	Unaltered	1
TCGA-ZB-A966	Altered	821		TCGA-BQ-5889	Unaltered	75		TCGA-FA-A82F	Unaltered	27		TCGA-2X-A9D6	Unaltered	7		TCGA-EA-A3QE	Unaltered	1
TCGA-QS-A5YR	Unaltered	821		TCGA-BQ-5892	Unaltered	75		TCGA-GS-A9TZ	Unaltered	27		TCGA-3S-A8YW	Unaltered	7		TCGA-EK-A2IP	Unaltered	1
TCGA-AA-3845	Unaltered	819		TCGA-EV-5901	Unaltered	75		TCGA-19-1389	Unaltered	27		TCGA-DE-A0Y2	Unaltered	7		TCGA-EK-A2PG	Altered	1
TCGA-B0-5098	Altered	817		TCGA-DD-AACN	Unaltered	75		TCGA-B8-A54D	Unaltered	27		TCGA-EL-A4K6	Unaltered	7		TCGA-EK-A2PL	Unaltered	1
TCGA-D8-A1XQ	Unaltered	803		TCGA-53-7626	Unaltered	75		TCGA-BP-5178	Altered	27		TCGA-EM-A2CJ	Unaltered	7		TCGA-EK-A3GJ	Unaltered	1
TCGA-EJ-7782	Unaltered	800		TCGA-39-5036	Unaltered	75		TCGA-5P-A9K8	Unaltered	27		TCGA-EM-A4FM	Unaltered	7		TCGA-FU-A3YQ	Unaltered	1
TCGA-AX-A05S	Altered	790		TCGA-56-8503	Unaltered	75		TCGA-DD-A4NI	Unaltered	27		TCGA-ET-A3BO	Unaltered	7		TCGA-FU-A770	Unaltered	1
TCGA-50-5049	Unaltered	779		TCGA-63-A5MJ	Unaltered	75		TCGA-DD-AADS	Unaltered	27		TCGA-AJ-A3BD	Unaltered	7		TCGA-HM-A3JK	Unaltered	1
TCGA-73-A9RS	Unaltered	767		TCGA-68-7757	Unaltered	75		TCGA-55-8097	Unaltered	27		TCGA-AP-A0LL	Unaltered	7		TCGA-IR-A3LB	Unaltered	1
TCGA-B5-A0JU	Unaltered	759		TCGA-ZB-A96A	Unaltered	75		TCGA-55-A48X	Unaltered	27		TCGA-AX-A0IU	Unaltered	7		TCGA-LP-A4AX	Unaltered	1
TCGA-FJ-A3ZE	Unaltered	749		TCGA-OR-A5JM	Unaltered	74		TCGA-55-A57B	Unaltered	27		TCGA-B5-A3FD	Unaltered	7		TCGA-MU-A8JM	Unaltered	1
TCGA-EC-A1QX	Unaltered	744		TCGA-BL-A3JM	Unaltered	74		TCGA-69-8254	Unaltered	27		TCGA-BG-A0M2	Unaltered	7		TCGA-PN-A8MA	Unaltered	1
TCGA-PK-A5HB	Unaltered	743		TCGA-HT-7677	Unaltered	74		TCGA-78-7160	Unaltered	27		TCGA-BK-A6W4	Unaltered	7		TCGA-VS-A953	Altered	1
TCGA-B5-A0JV	Unaltered	743		TCGA-AC-A7VB	Unaltered	74		TCGA-91-6848	Altered	27		TCGA-BS-A0V6	Unaltered	7		TCGA-VS-A9UI	Unaltered	1
TCGA-D1-A17A	Unaltered	743		TCGA-F5-6814	Altered	74		TCGA-21-1076	Unaltered	27		TCGA-D1-A17C	Unaltered	7		TCGA-VS-A9UO	Unaltered	1
TCGA-J9-A52C	Unaltered	735		TCGA-CA-5256	Unaltered	74		TCGA-37-4135	Unaltered	27		TCGA-EY-A1GC	Unaltered	7		TCGA-ZJ-AAXN	Unaltered	1
TCGA-B5-A3FC	Altered	731		TCGA-CA-6718	Altered	74		TCGA-37-A5EL	Unaltered	27		TCGA-EY-A1GV	Unaltered	7		TCGA-3X-AAVB	Unaltered	1
TCGA-BG-A0M4	Unaltered	721		TCGA-CV-5434	Unaltered	74		TCGA-TS-A8AI	Unaltered	27		TCGA-V4-A9EL	Unaltered	7		TCGA-W5-AA34	Unaltered	1
TCGA-A5-A0GW	Unaltered	711		TCGA-CV-7255	Unaltered	74		TCGA-XD-AAUI	Unaltered	27		TCGA-OR-A5KV	Unaltered	6		TCGA-ZU-A8S4	Unaltered	1
TCGA-F4-6703	Unaltered	706		TCGA-A3-3373	Unaltered	74		TCGA-WB-A81H	Unaltered	27		TCGA-OR-A5L6	Unaltered	6		TCGA-AF-3911	Unaltered	1
TCGA-D1-A17D	Unaltered	704		TCGA-B8-5163	Unaltered	74		TCGA-HC-7744	Unaltered	27		TCGA-OR-A5LE	Unaltered	6		TCGA-AG-3725	Unaltered	1
TCGA-66-2756	Unaltered	697		TCGA-2Y-A9GW	Unaltered	74		TCGA-FX-A48G	Altered	27		TCGA-OU-A5PI	Unaltered	6		TCGA-AG-3883	Unaltered	1
TCGA-QK-A6VB	Unaltered	686		TCGA-39-5039	Unaltered	74		TCGA-2G-AAFL	Unaltered	27		TCGA-P6-A5OF	Unaltered	6		TCGA-AG-A01Y	Unaltered	1
TCGA-D8-A1J8	Unaltered	684		TCGA-O2-A52S	Unaltered	74		TCGA-2G-AALF	Unaltered	27		TCGA-CF-A1HR	Altered	6		TCGA-CI-6620	Unaltered	1
TCGA-BS-A0V4	Unaltered	677		TCGA-KK-A59Y	Unaltered	74		TCGA-XM-A8RC	Unaltered	27		TCGA-CF-A5U8	Unaltered	6		TCGA-CL-4957	Unaltered	1
TCGA-EA-A3HU	Unaltered	676		TCGA-DX-A23Y	Unaltered	74		TCGA-BJ-A28V	Unaltered	27		TCGA-DK-AA6S	Unaltered	6		TCGA-DC-6681	Unaltered	1
TCGA-D1-A160	Unaltered	673		TCGA-NF-A4WX	Unaltered	74		TCGA-EM-A3SZ	Unaltered	27		TCGA-FD-A3B7	Unaltered	6		TCGA-EI-6881	Altered	1
TCGA-55-8508	Unaltered	669		TCGA-EY-A54A	Unaltered	74		TCGA-A5-A0GP	Unaltered	27		TCGA-GU-A42R	Unaltered	6		TCGA-EI-6885	Unaltered	1
TCGA-D1-A167	Altered	668		TCGA-DU-7019	Unaltered	73		TCGA-OR-A5K5	Unaltered	26		TCGA-GU-A762	Unaltered	6		TCGA-EI-7002	Unaltered	1
TCGA-B5-A11U	Altered	663		TCGA-S9-A6WP	Unaltered	73		TCGA-FD-A6TI	Unaltered	26		TCGA-K4-A4AC	Unaltered	6		TCGA-EI-7004	Unaltered	1
TCGA-BS-A0UA	Unaltered	658		TCGA-A7-A26H	Unaltered	73		TCGA-DU-8164	Altered	26		TCGA-KQ-A41O	Unaltered	6		TCGA-A6-5664	Unaltered	1
TCGA-AJ-A8CV	Unaltered	656		TCGA-AA-A00N	Altered	73		TCGA-S9-A7J1	Unaltered	26		TCGA-XF-AAMR	Unaltered	6		TCGA-A6-6137	Unaltered	1
TCGA-VS-A9U6	Unaltered	651		TCGA-CV-6935	Unaltered	73		TCGA-AN-A0AL	Unaltered	26		TCGA-ZF-A9R7	Altered	6		TCGA-AA-3973	Unaltered	1
TCGA-D1-A1NS	Unaltered	633		TCGA-B0-5096	Unaltered	73		TCGA-E9-A1N8	Unaltered	26		TCGA-ZF-A9RM	Unaltered	6		TCGA-AA-3975	Unaltered	1
TCGA-67-3771	Unaltered	629		TCGA-B8-4151	Unaltered	73		TCGA-Z7-A8R6	Unaltered	26		TCGA-DB-A64W	Unaltered	6		TCGA-AD-A5EK	Unaltered	1
TCGA-AX-A2IN	Unaltered	628		TCGA-B8-A54E	Unaltered	73		TCGA-C5-A2LY	Unaltered	26		TCGA-E1-5302	Unaltered	6		TCGA-CK-4948	Unaltered	1
TCGA-BH-A0HA	Unaltered	624		TCGA-G7-A8LD	Unaltered	73		TCGA-EK-A2RK	Unaltered	26		TCGA-HT-7879	Unaltered	6		TCGA-CK-6748	Unaltered	1
TCGA-94-8490	Unaltered	622		TCGA-IZ-A6M8	Unaltered	73		TCGA-EX-A1H5	Unaltered	26		TCGA-RY-A83Z	Unaltered	6		TCGA-CM-5860	Unaltered	1
TCGA-FI-A2D4	Unaltered	622		TCGA-95-7944	Unaltered	73		TCGA-JW-A5VK	Unaltered	26		TCGA-A2-A0ET	Unaltered	6		TCGA-CM-6161	Unaltered	1
TCGA-55-A490	Unaltered	621		TCGA-MP-A4TC	Unaltered	73		TCGA-VS-A9UV	Unaltered	26		TCGA-A8-A06P	Unaltered	6		TCGA-CM-6172	Unaltered	1
TCGA-22-A5C4	Unaltered	619		TCGA-43-A474	Unaltered	73		TCGA-CM-4747	Unaltered	26		TCGA-A8-A07F	Unaltered	6		TCGA-CM-6679	Unaltered	1
TCGA-XK-AAIW	Altered	609		TCGA-85-8052	Unaltered	73		TCGA-FF-A7CQ	Unaltered	26		TCGA-A8-A083	Unaltered	6		TCGA-DM-A28G	Unaltered	1
TCGA-D1-A2G5	Unaltered	607		TCGA-MF-A522	Unaltered	73		TCGA-FF-A7CW	Unaltered	26		TCGA-A8-A085	Unaltered	6		TCGA-F4-6808	Unaltered	1
TCGA-44-A479	Unaltered	606		TCGA-HC-8257	Unaltered	73		TCGA-CQ-6225	Unaltered	26		TCGA-AN-A0XO	Unaltered	6		TCGA-F4-6809	Altered	1
TCGA-VS-A9UJ	Unaltered	599		TCGA-V1-A9OF	Unaltered	73		TCGA-CV-A463	Unaltered	26		TCGA-AR-A1AI	Unaltered	6		TCGA-G4-6307	Unaltered	1
TCGA-44-8120	Unaltered	595		TCGA-AJ-A2QM	Unaltered	73		TCGA-F7-8298	Unaltered	26		TCGA-B6-A0X7	Unaltered	6		TCGA-G4-6626	Unaltered	1
TCGA-AP-A0LD	Unaltered	594		TCGA-UY-A78L	Unaltered	72		TCGA-KL-8343	Unaltered	26		TCGA-BH-A0E2	Unaltered	6		TCGA-FF-8046	Unaltered	1
TCGA-ZF-AA4W	Unaltered	590		TCGA-DH-A66B	Unaltered	72		TCGA-B2-5635	Unaltered	26		TCGA-BH-A0HF	Unaltered	6		TCGA-RQ-AAAT	Unaltered	1
TCGA-AX-A2HJ	Altered	581		TCGA-AN-A0XU	Unaltered	72		TCGA-CW-5587	Unaltered	26		TCGA-BH-A0HL	Unaltered	6		TCGA-VB-A8QN	Unaltered	1
TCGA-D1-A0ZS	Altered	578		TCGA-BH-A0DP	Unaltered	72		TCGA-B9-A69E	Unaltered	26		TCGA-BH-A18N	Unaltered	6		TCGA-06-5418	Unaltered	1
TCGA-D1-A176	Unaltered	573		TCGA-BH-A18U	Unaltered	72		TCGA-UZ-A9PZ	Unaltered	26		TCGA-BH-A18P	Unaltered	6		TCGA-26-5135	Unaltered	1
TCGA-EY-A1GO	Unaltered	569		TCGA-C5-A7CO	Altered	72		TCGA-CC-A7II	Unaltered	26		TCGA-BH-A1FH	Unaltered	6		TCGA-28-5204	Unaltered	1
TCGA-SJ-A6ZI	Unaltered	561		TCGA-CV-A45Y	Unaltered	72		TCGA-EP-A3JL	Unaltered	26		TCGA-BH-A28Q	Unaltered	6		TCGA-32-1970	Unaltered	1
TCGA-86-8585	Unaltered	554		TCGA-HD-A4C1	Unaltered	72		TCGA-05-4422	Unaltered	26		TCGA-C8-A12U	Unaltered	6		TCGA-06-0238	Unaltered	1
TCGA-22-5473	Unaltered	553		TCGA-HD-A6HZ	Unaltered	72		TCGA-50-5044	Altered	26		TCGA-C8-A1HG	Unaltered	6		TCGA-06-0646	Unaltered	1
TCGA-BG-A0VW	Unaltered	549		TCGA-2Z-A9J8	Unaltered	72		TCGA-71-8520	Unaltered	26		TCGA-C8-A27B	Unaltered	6		TCGA-16-0846	Unaltered	1
TCGA-NJ-A4YQ	Unaltered	539		TCGA-HE-A5NJ	Unaltered	72		TCGA-78-8640	Unaltered	26		TCGA-D8-A1J9	Unaltered	6		TCGA-BA-A4IH	Unaltered	1
TCGA-BS-A0UM	Unaltered	537		TCGA-SX-A71S	Unaltered	72		TCGA-93-A4JN	Unaltered	26		TCGA-E2-A14X	Unaltered	6		TCGA-BA-A6DL	Unaltered	1
TCGA-05-4427	Altered	534		TCGA-69-7763	Unaltered	72		TCGA-77-7140	Unaltered	26		TCGA-E2-A570	Unaltered	6		TCGA-BB-4228	Unaltered	1
TCGA-44-3918	Unaltered	531		TCGA-21-5786	Unaltered	72		TCGA-77-8008	Unaltered	26		TCGA-E9-A24A	Unaltered	6		TCGA-CN-4740	Unaltered	1
TCGA-AA-3680	Altered	530		TCGA-33-4583	Unaltered	72		TCGA-85-8354	Unaltered	26		TCGA-E9-A6HE	Unaltered	6		TCGA-CN-5358	Unaltered	1
TCGA-AJ-A3OL	Unaltered	529		TCGA-N8-A4PM	Unaltered	72		TCGA-EJ-7317	Unaltered	26		TCGA-PL-A8LX	Unaltered	6		TCGA-CQ-5330	Unaltered	1
TCGA-55-8205	Unaltered	523		TCGA-QF-A5YS	Unaltered	72		TCGA-AP-A0LJ	Unaltered	26		TCGA-S3-AA0Z	Unaltered	6		TCGA-CR-6484	Unaltered	1
TCGA-86-8073	Unaltered	523		TCGA-4Z-AA82	Unaltered	71		TCGA-AX-A1CF	Unaltered	26		TCGA-C5-A1M7	Altered	6		TCGA-CR-6493	Unaltered	1
TCGA-AA-3864	Unaltered	520		TCGA-4Z-AA87	Unaltered	71		TCGA-AX-A3G4	Unaltered	26		TCGA-C5-A2M2	Unaltered	6		TCGA-CR-7367	Unaltered	1
TCGA-55-A4DG	Unaltered	507		TCGA-DK-AA6P	Unaltered	71		TCGA-4Z-AA89	Unaltered	25		TCGA-C5-A7X8	Unaltered	6		TCGA-CR-7386	Unaltered	1
TCGA-56-7222	Unaltered	507		TCGA-A1-A0SJ	Unaltered	71		TCGA-BL-A5ZZ	Unaltered	25		TCGA-ZJ-AAXJ	Unaltered	6		TCGA-CV-6940	Unaltered	1
TCGA-E7-A3Y1	Unaltered	506		TCGA-A2-A0EN	Unaltered	71		TCGA-DK-AA71	Unaltered	25		TCGA-3X-AAVA	Unaltered	6		TCGA-CV-6941	Unaltered	1
TCGA-3B-A9HT	Unaltered	505		TCGA-BH-A0B3	Unaltered	71		TCGA-XF-AAN5	Unaltered	25		TCGA-DC-5337	Unaltered	6		TCGA-CV-7103	Unaltered	1
TCGA-DF-A2KU	Altered	494		TCGA-D8-A1XG	Unaltered	71		TCGA-ZF-A9R9	Unaltered	25		TCGA-DC-6158	Unaltered	6		TCGA-CV-7421	Unaltered	1
TCGA-A5-A0GI	Unaltered	493		TCGA-Q1-A73Q	Unaltered	71		TCGA-A2-A0CU	Unaltered	25		TCGA-DY-A1DF	Unaltered	6		TCGA-CV-A460	Unaltered	1
TCGA-EO-A22R	Altered	492		TCGA-D5-6536	Unaltered	71		TCGA-AC-A2BK	Unaltered	25		TCGA-F5-6813	Unaltered	6		TCGA-D6-A4ZB	Unaltered	1
TCGA-A4-7585	Unaltered	488		TCGA-G4-6299	Unaltered	71		TCGA-BH-A18I	Unaltered	25		TCGA-4T-AA8H	Unaltered	6		TCGA-H7-8501	Unaltered	1
TCGA-B5-A0K2	Unaltered	467		TCGA-BA-4074	Unaltered	71		TCGA-C8-A26W	Unaltered	25		TCGA-A6-6654	Unaltered	6		TCGA-H7-A6C4	Unaltered	1
TCGA-AJ-A8CT	Unaltered	465		TCGA-CN-5365	Altered	71		TCGA-D8-A27F	Unaltered	25		TCGA-AA-3678	Altered	6		TCGA-IQ-7630	Unaltered	1
TCGA-W5-AA39	Unaltered	464		TCGA-CV-6945	Unaltered	71		TCGA-C5-A1MI	Unaltered	25		TCGA-CM-4748	Unaltered	6		TCGA-QK-A6VC	Unaltered	1
TCGA-MN-A4N4	Unaltered	462		TCGA-BP-4162	Unaltered	71		TCGA-IR-A3LA	Unaltered	25		TCGA-D5-6534	Unaltered	6		TCGA-QK-A8ZA	Unaltered	1
TCGA-D8-A1XK	Altered	461		TCGA-DD-AACH	Unaltered	71		TCGA-AG-3909	Unaltered	25		TCGA-D5-6922	Unaltered	6		TCGA-TN-A7HI	Unaltered	1
TCGA-B8-A54H	Unaltered	452		TCGA-DD-AAE6	Unaltered	71		TCGA-4N-A93T	Unaltered	25		TCGA-G4-6298	Unaltered	6		TCGA-UF-A7JS	Unaltered	1
TCGA-OR-A5LB	Unaltered	446		TCGA-69-7979	Unaltered	71		TCGA-AA-A024	Unaltered	25		TCGA-G4-6627	Unaltered	6		TCGA-UF-A7JV	Unaltered	1
TCGA-44-5644	Unaltered	446		TCGA-80-5608	Unaltered	71		TCGA-F4-6463	Unaltered	25		TCGA-GS-A9TY	Unaltered	6		TCGA-KL-8323	Unaltered	1
TCGA-PG-A6IB	Altered	443		TCGA-XJ-A83H	Unaltered	71		TCGA-CN-5366	Unaltered	25		TCGA-06-0168	Unaltered	6		TCGA-KL-8330	Unaltered	1
TCGA-85-A4QQ	Unaltered	436		TCGA-2G-AAM3	Unaltered	71		TCGA-CV-7440	Unaltered	25		TCGA-06-0743	Unaltered	6		TCGA-KM-8442	Unaltered	1
TCGA-AX-A064	Unaltered	436		TCGA-5U-AB0E	Unaltered	71		TCGA-CV-A45Q	Unaltered	25		TCGA-14-0790	Unaltered	6		TCGA-KM-8443	Unaltered	1
TCGA-AA-A01R	Unaltered	431		TCGA-DU-7018	Unaltered	70		TCGA-UF-A7JF	Unaltered	25		TCGA-BB-8596	Unaltered	6		TCGA-KM-8639	Unaltered	1
TCGA-22-4613	Unaltered	430		TCGA-TQ-A7RQ	Unaltered	70		TCGA-UF-A7JT	Altered	25		TCGA-CN-A49B	Unaltered	6		TCGA-KO-8414	Unaltered	1
TCGA-BS-A0UL	Unaltered	427		TCGA-A2-A0EY	Unaltered	70		TCGA-EU-5906	Unaltered	25		TCGA-CQ-A4C9	Unaltered	6		TCGA-A3-3357	Unaltered	1
TCGA-D8-A1Y1	Unaltered	422		TCGA-A7-A13E	Unaltered	70		TCGA-G7-6792	Unaltered	25		TCGA-CR-5243	Unaltered	6		TCGA-AK-3456	Unaltered	1
TCGA-05-4424	Unaltered	421		TCGA-E2-A14R	Unaltered	70		TCGA-G3-AAUZ	Unaltered	25		TCGA-CV-7424	Unaltered	6		TCGA-B0-4700	Unaltered	1
TCGA-CV-A461	Unaltered	418		TCGA-F5-6864	Unaltered	70		TCGA-55-8510	Unaltered	25		TCGA-D6-6517	Unaltered	6		TCGA-B8-5553	Unaltered	1
TCGA-BS-A0VI	Unaltered	417		TCGA-CR-7383	Unaltered	70		TCGA-22-4596	Unaltered	25		TCGA-HD-8314	Unaltered	6		TCGA-B8-A54G	Unaltered	1
TCGA-EY-A1GQ	Unaltered	417		TCGA-D6-A74Q	Unaltered	70		TCGA-22-5477	Unaltered	25		TCGA-MT-A51W	Unaltered	6		TCGA-BP-4974	Unaltered	1
TCGA-5P-A9JW	Unaltered	412		TCGA-KU-A66S	Unaltered	70		TCGA-85-8276	Unaltered	25		TCGA-UF-A7JO	Unaltered	6		TCGA-BP-4982	Unaltered	1
TCGA-DD-A1EE	Unaltered	411		TCGA-B8-5545	Unaltered	70		TCGA-HZ-8001	Unaltered	25		TCGA-KL-8333	Unaltered	6		TCGA-BP-4992	Unaltered	1
TCGA-92-8063	Unaltered	411		TCGA-B9-A8YI	Unaltered	70		TCGA-HC-7820	Unaltered	25		TCGA-KO-8408	Unaltered	6		TCGA-BP-5173	Unaltered	1
TCGA-75-5126	Altered	409		TCGA-SX-A7SO	Unaltered	70		TCGA-J4-A6G3	Unaltered	25		TCGA-B0-4815	Unaltered	6		TCGA-BP-5201	Unaltered	1
TCGA-Y8-A896	Unaltered	406		TCGA-BC-A10T	Unaltered	70		TCGA-XA-A8JR	Unaltered	25		TCGA-B0-5102	Unaltered	6		TCGA-CJ-4908	Unaltered	1
TCGA-64-5781	Unaltered	406		TCGA-DD-AAEB	Altered	70		TCGA-DX-A3LS	Unaltered	25		TCGA-BP-5007	Unaltered	6		TCGA-CJ-6032	Unaltered	1
TCGA-B5-A0K6	Unaltered	404		TCGA-91-6847	Unaltered	70		TCGA-DX-AB2F	Unaltered	25		TCGA-BP-5187	Unaltered	6		TCGA-CZ-5988	Unaltered	1
TCGA-EC-A24G	Unaltered	404		TCGA-22-5472	Unaltered	70		TCGA-K1-A6RU	Unaltered	25		TCGA-5P-A9JV	Unaltered	6		TCGA-EU-5904	Altered	1
TCGA-33-4566	Unaltered	402		TCGA-63-5131	Unaltered	70		TCGA-DJ-A13L	Unaltered	25		TCGA-A4-7287	Unaltered	6		TCGA-A4-8310	Unaltered	1
TCGA-68-A59J	Unaltered	401		TCGA-66-2763	Unaltered	70		TCGA-EL-A3D6	Unaltered	25		TCGA-B9-4116	Unaltered	6		TCGA-AL-3467	Unaltered	1
TCGA-WQ-A9G7	Unaltered	395		TCGA-85-7696	Unaltered	70		TCGA-2E-A9G8	Unaltered	25		TCGA-DW-5561	Unaltered	6		TCGA-B3-4103	Unaltered	1
TCGA-55-7994	Unaltered	393		TCGA-85-7710	Unaltered	70		TCGA-BG-A0LW	Unaltered	25		TCGA-G7-6793	Unaltered	6		TCGA-BQ-5881	Unaltered	1
TCGA-P4-AAVL	Unaltered	391		TCGA-90-7964	Unaltered	70		TCGA-GV-A3QK	Unaltered	24		TCGA-CC-A9FV	Unaltered	6		TCGA-BQ-5894	Unaltered	1
TCGA-CR-7388	Unaltered	386		TCGA-92-8064	Unaltered	70		TCGA-DU-7306	Unaltered	24		TCGA-DD-A4NF	Unaltered	6		TCGA-DW-7834	Unaltered	1
TCGA-34-7107	Unaltered	381		TCGA-HZ-A77Q	Unaltered	70		TCGA-A2-A0CS	Unaltered	24		TCGA-DD-A4NJ	Unaltered	6		TCGA-DZ-6131	Unaltered	1
TCGA-A5-A2K3	Unaltered	377		TCGA-EJ-8468	Unaltered	70		TCGA-A2-A0T2	Unaltered	24		TCGA-DD-AAVR	Unaltered	6		TCGA-G7-7501	Unaltered	1
TCGA-CJ-4903	Unaltered	373		TCGA-YL-A8SC	Unaltered	70		TCGA-A8-A08L	Unaltered	24		TCGA-DD-AAW0	Unaltered	6		TCGA-2Y-A9HB	Unaltered	1
TCGA-50-6590	Unaltered	373		TCGA-DX-AB2E	Unaltered	70		TCGA-AN-A0FT	Unaltered	24		TCGA-DD-AAW2	Unaltered	6		TCGA-5C-AAPD	Unaltered	1
TCGA-CV-A6K1	Unaltered	369		TCGA-X7-A8M8	Unaltered	70		TCGA-BH-A0DE	Unaltered	24		TCGA-G3-A5SI	Unaltered	6		TCGA-BC-A10Q	Unaltered	1
TCGA-98-A53A	Unaltered	365		TCGA-FD-A6TC	Unaltered	69		TCGA-C8-A12K	Unaltered	24		TCGA-G3-AAV3	Unaltered	6		TCGA-BC-A216	Unaltered	1
TCGA-O2-A52N	Unaltered	364		TCGA-A2-A04N	Unaltered	69		TCGA-D8-A143	Unaltered	24		TCGA-K7-AAU7	Unaltered	6		TCGA-CC-A8HU	Unaltered	1
TCGA-A6-A565	Unaltered	363		TCGA-E2-A105	Unaltered	69		TCGA-E9-A3HO	Unaltered	24		TCGA-RC-A7SK	Unaltered	6		TCGA-DD-A119	Unaltered	1
TCGA-D1-A103	Altered	362		TCGA-E2-A10B	Unaltered	69		TCGA-VS-A9UM	Unaltered	24		TCGA-49-4501	Unaltered	6		TCGA-DD-AACK	Unaltered	1
TCGA-CR-5248	Unaltered	355		TCGA-UC-A7PF	Unaltered	69		TCGA-CI-6624	Unaltered	24		TCGA-49-4506	Unaltered	6		TCGA-DD-AAD3	Unaltered	1
TCGA-NJ-A4YF	Unaltered	354		TCGA-DM-A0XD	Unaltered	69		TCGA-A6-3810	Unaltered	24		TCGA-78-7154	Unaltered	6		TCGA-DD-AAE1	Unaltered	1
TCGA-FD-A62O	Unaltered	353		TCGA-CV-7414	Unaltered	69		TCGA-DM-A28K	Unaltered	24		TCGA-93-7347	Unaltered	6		TCGA-DD-AAEK	Unaltered	1
TCGA-56-6546	Unaltered	348		TCGA-WA-A7GZ	Altered	69		TCGA-F4-6569	Unaltered	24		TCGA-33-4582	Unaltered	6		TCGA-DD-AAVW	Unaltered	1
TCGA-EY-A2OM	Unaltered	346		TCGA-B0-5119	Unaltered	69		TCGA-CR-5250	Unaltered	24		TCGA-33-AAS8	Unaltered	6		TCGA-ED-A66Y	Unaltered	1
TCGA-44-7670	Unaltered	345		TCGA-B4-5835	Altered	69		TCGA-B0-4842	Unaltered	24		TCGA-43-8115	Unaltered	6		TCGA-ED-A7PX	Unaltered	1
TCGA-94-8491	Unaltered	345		TCGA-2Z-A9J1	Unaltered	69		TCGA-BP-5182	Unaltered	24		TCGA-60-2711	Unaltered	6		TCGA-FV-A3I1	Altered	1
TCGA-AX-A1C5	Unaltered	345		TCGA-4A-A93W	Unaltered	69		TCGA-A4-A57E	Unaltered	24		TCGA-66-2769	Unaltered	6		TCGA-FV-A496	Unaltered	1
TCGA-E7-A85H	Unaltered	344		TCGA-F9-A97G	Unaltered	69		TCGA-AL-3473	Unaltered	24		TCGA-77-8130	Unaltered	6		TCGA-G3-A25Y	Unaltered	1
TCGA-44-7671	Unaltered	342		TCGA-55-7576	Unaltered	69		TCGA-BQ-5885	Unaltered	24		TCGA-NC-A5HL	Unaltered	6		TCGA-G3-AAV5	Unaltered	1
TCGA-D1-A17B	Unaltered	340		TCGA-91-6831	Unaltered	69		TCGA-CC-A7IF	Unaltered	24		TCGA-3U-A98J	Unaltered	6		TCGA-GJ-A9DB	Unaltered	1
TCGA-19-1787	Unaltered	339		TCGA-J2-A4AD	Unaltered	69		TCGA-DD-A4NH	Unaltered	24		TCGA-LK-A4O2	Unaltered	6		TCGA-05-4395	Unaltered	1
TCGA-49-AAR9	Unaltered	339		TCGA-56-5897	Unaltered	69		TCGA-DD-AAC8	Unaltered	24		TCGA-2J-AABO	Unaltered	6		TCGA-35-4122	Unaltered	1
TCGA-05-4432	Unaltered	338		TCGA-63-A5ML	Unaltered	69		TCGA-DD-AAD0	Altered	24		TCGA-IB-7647	Unaltered	6		TCGA-50-5936	Unaltered	1
TCGA-B1-A655	Unaltered	335		TCGA-GU-AATP	Unaltered	68		TCGA-DD-AAVS	Unaltered	24		TCGA-XD-AAUG	Unaltered	6		TCGA-50-6591	Unaltered	1
TCGA-UY-A9PB	Unaltered	334		TCGA-CS-6667	Unaltered	68		TCGA-44-A4SU	Unaltered	24		TCGA-QR-A705	Unaltered	6		TCGA-50-6595	Unaltered	1
TCGA-55-7903	Unaltered	333		TCGA-AA-3660	Unaltered	68		TCGA-91-6849	Unaltered	24		TCGA-2A-AAYU	Unaltered	6		TCGA-50-8457	Unaltered	1
TCGA-64-5775	Altered	332		TCGA-BB-8601	Unaltered	68		TCGA-60-2709	Unaltered	24		TCGA-CH-5792	Unaltered	6		TCGA-55-6971	Unaltered	1
TCGA-AX-A05Z	Altered	328		TCGA-BP-4999	Unaltered	68		TCGA-77-7139	Unaltered	24		TCGA-EJ-5525	Unaltered	6		TCGA-55-7728	Unaltered	1
TCGA-FA-A6HN	Unaltered	327		TCGA-CZ-5982	Unaltered	68		TCGA-ZN-A9VP	Unaltered	24		TCGA-EJ-5531	Unaltered	6		TCGA-55-8087	Unaltered	1
TCGA-Q2-A5QZ	Unaltered	326		TCGA-B1-A654	Unaltered	68		TCGA-2J-AAB8	Unaltered	24		TCGA-EJ-7314	Unaltered	6		TCGA-55-8206	Unaltered	1
TCGA-21-5783	Unaltered	325		TCGA-UZ-A9PK	Unaltered	68		TCGA-HZ-A4BH	Unaltered	24		TCGA-EJ-A8FN	Unaltered	6		TCGA-62-A46S	Unaltered	1
TCGA-L9-A8F4	Unaltered	319		TCGA-ES-A2HS	Unaltered	68		TCGA-QT-A5XN	Unaltered	24		TCGA-HC-7080	Unaltered	6		TCGA-71-6725	Unaltered	1
TCGA-86-7711	Unaltered	318		TCGA-64-1679	Unaltered	68		TCGA-S7-A7WT	Unaltered	24		TCGA-YL-A8SK	Unaltered	6		TCGA-75-6205	Unaltered	1
TCGA-63-5128	Unaltered	317		TCGA-56-8625	Unaltered	68		TCGA-DX-AATS	Unaltered	24		TCGA-YL-A8SL	Unaltered	6		TCGA-75-6206	Unaltered	1
TCGA-F9-A7VF	Unaltered	312		TCGA-63-A5MV	Unaltered	68		TCGA-WK-A8XX	Unaltered	24		TCGA-YL-A9WH	Unaltered	6		TCGA-86-7954	Unaltered	1
TCGA-L9-A7SV	Unaltered	311		TCGA-L3-A524	Unaltered	68		TCGA-EB-A24D	Unaltered	24		TCGA-DX-A2J4	Unaltered	6		TCGA-86-8074	Unaltered	1
TCGA-98-A538	Unaltered	310		TCGA-HC-7081	Unaltered	68		TCGA-2G-AAG5	Unaltered	24		TCGA-DX-A3UE	Unaltered	6		TCGA-91-6840	Unaltered	1
TCGA-55-8507	Unaltered	309		TCGA-ER-A196	Unaltered	68		TCGA-X7-A8M6	Unaltered	24		TCGA-DX-A48U	Unaltered	6		TCGA-22-4607	Unaltered	1
TCGA-MA-AA42	Unaltered	308		TCGA-NA-A4QW	Unaltered	68		TCGA-NF-A4X2	Unaltered	24		TCGA-DX-A6YX	Unaltered	6		TCGA-34-5929	Unaltered	1
TCGA-55-1596	Unaltered	308		TCGA-B5-A5OE	Unaltered	68		TCGA-4Z-AA81	Unaltered	23		TCGA-DX-A8BH	Unaltered	6		TCGA-39-5035	Unaltered	1
TCGA-FI-A2D5	Altered	307		TCGA-BS-A0TI	Unaltered	68		TCGA-4Z-AA86	Altered	23		TCGA-HB-A3L4	Unaltered	6		TCGA-63-A5MP	Unaltered	1
TCGA-22-4604	Unaltered	302		TCGA-BS-A0UV	Altered	68		TCGA-CU-A3YL	Unaltered	23		TCGA-EB-A3Y7	Unaltered	6		TCGA-77-8007	Unaltered	1
TCGA-MN-A4N5	Unaltered	301		TCGA-DB-5275	Unaltered	67		TCGA-HT-7471	Unaltered	23		TCGA-XE-AAOJ	Unaltered	6		TCGA-77-8143	Unaltered	1
TCGA-GL-A9DC	Unaltered	300		TCGA-FG-A4MX	Unaltered	67		TCGA-HT-7684	Altered	23		TCGA-YU-AA4L	Unaltered	6		TCGA-85-6175	Unaltered	1
TCGA-YF-AA3L	Unaltered	299		TCGA-E2-A14Z	Unaltered	67		TCGA-TQ-A7RI	Unaltered	23		TCGA-ZM-AA0B	Unaltered	6		TCGA-85-A50M	Unaltered	1
TCGA-44-4112	Unaltered	298		TCGA-WL-A834	Unaltered	67		TCGA-A2-A3XV	Unaltered	23		TCGA-DJ-A2PZ	Unaltered	6		TCGA-NK-A7XE	Unaltered	1
TCGA-DD-AACI	Unaltered	297		TCGA-W5-AA2Z	Unaltered	67		TCGA-A7-A13D	Unaltered	23		TCGA-EL-A3MZ	Unaltered	6		TCGA-3H-AB3L	Unaltered	1
TCGA-G3-A7M5	Unaltered	297		TCGA-CV-6937	Unaltered	67		TCGA-A7-A5ZX	Unaltered	23		TCGA-EM-A3SY	Unaltered	6		TCGA-LK-A4NW	Unaltered	1
TCGA-49-AARE	Altered	296		TCGA-A3-3322	Unaltered	67		TCGA-A8-A075	Unaltered	23		TCGA-ET-A3BT	Unaltered	6		TCGA-LK-A4NZ	Unaltered	1
TCGA-AA-3855	Unaltered	294		TCGA-A3-A6NN	Unaltered	67		TCGA-AR-A5QP	Unaltered	23		TCGA-5B-A90C	Unaltered	6		TCGA-LK-A4O5	Unaltered	1
TCGA-43-5668	Unaltered	293		TCGA-DD-AADG	Unaltered	67		TCGA-BH-A42V	Unaltered	23		TCGA-B5-A11N	Altered	6		TCGA-NQ-A638	Unaltered	1
TCGA-56-A62T	Unaltered	293		TCGA-FV-A3R2	Unaltered	67		TCGA-D8-A1X6	Unaltered	23		TCGA-B5-A11R	Unaltered	6		TCGA-SC-A6LP	Unaltered	1
TCGA-05-4382	Unaltered	291		TCGA-44-A4SS	Unaltered	67		TCGA-E9-A244	Altered	23		TCGA-B5-A1MY	Unaltered	6		TCGA-UT-A88E	Altered	1
TCGA-49-4487	Altered	291		TCGA-97-A4M7	Altered	67		TCGA-LD-A7W5	Unaltered	23		TCGA-DF-A2L0	Unaltered	6		TCGA-YS-AA4M	Unaltered	1
TCGA-05-4390	Unaltered	290		TCGA-66-2765	Unaltered	67		TCGA-EA-A5O9	Unaltered	23		TCGA-E6-A1M0	Altered	6		TCGA-2J-AAB4	Unaltered	1
TCGA-86-8673	Altered	289		TCGA-66-2781	Unaltered	67		TCGA-VS-A8QF	Altered	23		TCGA-QS-A5YQ	Unaltered	6		TCGA-3A-A9IB	Unaltered	1
TCGA-CJ-6031	Unaltered	287		TCGA-85-A4CN	Unaltered	67		TCGA-DC-6683	Unaltered	23		TCGA-VD-AA8S	Unaltered	6		TCGA-3E-AAAY	Unaltered	1
TCGA-44-6778	Unaltered	287		TCGA-QR-A708	Unaltered	67		TCGA-F4-6459	Unaltered	23		TCGA-2F-A9KP	Unaltered	5		TCGA-FB-A545	Unaltered	1
TCGA-37-5819	Unaltered	287		TCGA-EB-A44N	Unaltered	67		TCGA-12-0618	Unaltered	23		TCGA-4Z-AA80	Unaltered	5		TCGA-HZ-7922	Unaltered	1
TCGA-CN-A63U	Unaltered	285		TCGA-A5-A0GU	Unaltered	67		TCGA-06-0644	Unaltered	23		TCGA-DK-A3X1	Unaltered	5		TCGA-IB-7644	Unaltered	1
TCGA-34-5231	Unaltered	285		TCGA-D1-A16N	Unaltered	67		TCGA-CV-5973	Unaltered	23		TCGA-DK-A6B5	Unaltered	5		TCGA-IB-7646	Unaltered	1
TCGA-50-6594	Unaltered	284		TCGA-BL-A13I	Unaltered	66		TCGA-MZ-A7D7	Unaltered	23		TCGA-FD-A5BR	Unaltered	5		TCGA-IB-7889	Unaltered	1
TCGA-98-A53I	Unaltered	284		TCGA-DK-A3X2	Unaltered	66		TCGA-BP-5175	Unaltered	23		TCGA-GC-A3RD	Unaltered	5		TCGA-IB-A5SQ	Unaltered	1
TCGA-NC-A5HD	Unaltered	284		TCGA-FJ-A871	Unaltered	66		TCGA-BP-5186	Unaltered	23		TCGA-GU-AATO	Unaltered	5		TCGA-US-A77G	Unaltered	1
TCGA-OR-A5LJ	Unaltered	282		TCGA-TQ-A7RH	Unaltered	66		TCGA-UZ-A9PX	Unaltered	23		TCGA-K4-A3WU	Unaltered	5		TCGA-P8-A5KD	Unaltered	1
TCGA-4Z-AA83	Unaltered	279		TCGA-D8-A1XL	Unaltered	66		TCGA-DD-A4NK	Unaltered	23		TCGA-ZF-A9R0	Unaltered	5		TCGA-QR-A6GO	Unaltered	1
TCGA-B0-5116	Altered	279		TCGA-OL-A66P	Unaltered	66		TCGA-86-8075	Unaltered	23		TCGA-ZF-A9R1	Unaltered	5		TCGA-QR-A70V	Unaltered	1
TCGA-50-5045	Unaltered	279		TCGA-A6-2684	Unaltered	66		TCGA-97-7546	Unaltered	23		TCGA-ZF-AA5P	Unaltered	5		TCGA-RW-A67X	Unaltered	1
TCGA-QG-A5YV	Unaltered	277		TCGA-A3-3320	Unaltered	66		TCGA-56-8082	Unaltered	23		TCGA-DB-A4XF	Unaltered	5		TCGA-RW-A680	Unaltered	1
TCGA-86-8358	Unaltered	277		TCGA-B0-4818	Unaltered	66		TCGA-85-A4JC	Unaltered	23		TCGA-DB-A75O	Unaltered	5		TCGA-RW-A681	Unaltered	1
TCGA-SX-A7SM	Altered	276		TCGA-2Z-A9JM	Unaltered	66		TCGA-2J-AAB1	Unaltered	23		TCGA-DU-6399	Unaltered	5		TCGA-SP-A6QD	Unaltered	1
TCGA-SX-A7SQ	Unaltered	276		TCGA-B9-4617	Unaltered	66		TCGA-KK-A7B2	Unaltered	23		TCGA-FG-7643	Unaltered	5		TCGA-SQ-A6I4	Unaltered	1
TCGA-37-4132	Unaltered	275		TCGA-BQ-7058	Unaltered	66		TCGA-ZB-A96V	Unaltered	23		TCGA-HT-7601	Unaltered	5		TCGA-SR-A6N0	Unaltered	1
TCGA-DB-5274	Unaltered	271		TCGA-DZ-6135	Unaltered	66		TCGA-N5-A4RU	Unaltered	23		TCGA-HT-7873	Unaltered	5		TCGA-WB-A81I	Unaltered	1
TCGA-78-8662	Unaltered	271		TCGA-66-2794	Unaltered	66		TCGA-5S-A9Q8	Unaltered	23		TCGA-HT-8110	Unaltered	5		TCGA-2A-A8VX	Unaltered	1
TCGA-44-7669	Unaltered	270		TCGA-85-8580	Unaltered	66		TCGA-AX-A05T	Unaltered	23		TCGA-QH-A65S	Unaltered	5		TCGA-CH-5738	Unaltered	1
TCGA-DH-A7UR	Unaltered	268		TCGA-SP-A6QK	Unaltered	66		TCGA-D1-A16X	Unaltered	23		TCGA-S9-A7J3	Unaltered	5		TCGA-CH-5767	Unaltered	1
TCGA-6A-AB49	Unaltered	267		TCGA-WB-A81N	Unaltered	66		TCGA-H5-A2HR	Unaltered	23		TCGA-TM-A84L	Unaltered	5		TCGA-CH-5771	Unaltered	1
TCGA-EA-A3HS	Unaltered	266		TCGA-OR-A5J1	Unaltered	65		TCGA-OR-A5J7	Unaltered	22		TCGA-TM-A84Q	Unaltered	5		TCGA-CH-5788	Unaltered	1
TCGA-BP-4782	Unaltered	266		TCGA-OR-A5K1	Unaltered	65		TCGA-5N-A9KM	Unaltered	22		TCGA-TQ-A7RM	Unaltered	5		TCGA-CH-5791	Unaltered	1
TCGA-5P-A9JY	Unaltered	266		TCGA-OR-A5LO	Unaltered	65		TCGA-K4-A6MB	Altered	22		TCGA-TQ-A7RS	Unaltered	5		TCGA-CH-5794	Unaltered	1
TCGA-37-4141	Unaltered	266		TCGA-P5-A5EV	Unaltered	65		TCGA-E1-A7Z6	Unaltered	22		TCGA-WY-A85A	Unaltered	5		TCGA-EJ-5494	Unaltered	1
TCGA-78-7155	Unaltered	265		TCGA-S9-A7IY	Unaltered	65		TCGA-HT-A74H	Altered	22		TCGA-A8-A07J	Unaltered	5		TCGA-EJ-5508	Altered	1
TCGA-CC-5258	Altered	264		TCGA-A8-A086	Unaltered	65		TCGA-AR-A0TP	Unaltered	22		TCGA-A8-A09T	Unaltered	5		TCGA-EJ-5527	Unaltered	1
TCGA-B1-A47M	Unaltered	263		TCGA-DM-A1D8	Unaltered	65		TCGA-B6-A40C	Unaltered	22		TCGA-AC-A62V	Unaltered	5		TCGA-EJ-7125	Unaltered	1
TCGA-34-5240	Unaltered	263		TCGA-06-0184	Unaltered	65		TCGA-BH-A18F	Unaltered	22		TCGA-AN-A0FS	Unaltered	5		TCGA-EJ-7791	Unaltered	1
TCGA-GV-A3QI	Unaltered	261		TCGA-P3-A5Q5	Unaltered	65		TCGA-D8-A140	Unaltered	22		TCGA-AN-A0XR	Unaltered	5		TCGA-EJ-A7NM	Unaltered	1
TCGA-CR-7364	Unaltered	261		TCGA-T2-A6WZ	Unaltered	65		TCGA-D8-A1JB	Unaltered	22		TCGA-AO-A0J5	Unaltered	5		TCGA-G9-6364	Unaltered	1
TCGA-B0-5110	Unaltered	260		TCGA-KM-8440	Unaltered	65		TCGA-E2-A109	Unaltered	22		TCGA-AO-A0JM	Unaltered	5		TCGA-G9-6371	Unaltered	1
TCGA-B9-A44B	Altered	260		TCGA-B0-4810	Unaltered	65		TCGA-S3-AA17	Unaltered	22		TCGA-AO-A12E	Unaltered	5		TCGA-H9-7775	Unaltered	1
TCGA-EY-A547	Unaltered	260		TCGA-BP-4960	Unaltered	65		TCGA-V7-A7HQ	Unaltered	22		TCGA-AR-A0TT	Unaltered	5		TCGA-HC-7742	Unaltered	1
TCGA-05-4398	Unaltered	258		TCGA-CJ-4912	Unaltered	65		TCGA-FU-A3HZ	Unaltered	22		TCGA-AR-A0TZ	Unaltered	5		TCGA-HC-7750	Unaltered	1
TCGA-50-5932	Unaltered	257		TCGA-B1-A657	Unaltered	65		TCGA-JW-A5VI	Unaltered	22		TCGA-AR-A24K	Unaltered	5		TCGA-HC-A6AQ	Unaltered	1
TCGA-QK-A8Z8	Unaltered	256		TCGA-EP-A26S	Unaltered	65		TCGA-AA-3955	Unaltered	22		TCGA-B6-A0WV	Unaltered	5		TCGA-HC-A6HX	Unaltered	1
TCGA-56-8308	Unaltered	256		TCGA-RC-A6M6	Unaltered	65		TCGA-AZ-6606	Unaltered	22		TCGA-BH-A0AU	Unaltered	5		TCGA-HC-A8CY	Unaltered	1
TCGA-66-2759	Unaltered	256		TCGA-55-A491	Unaltered	65		TCGA-CM-6680	Unaltered	22		TCGA-BH-A0BC	Unaltered	5		TCGA-KC-A4BV	Unaltered	1
TCGA-T9-A92H	Unaltered	255		TCGA-67-4679	Unaltered	65		TCGA-D5-6931	Unaltered	22		TCGA-BH-A0DV	Unaltered	5		TCGA-KC-A7F3	Unaltered	1
TCGA-43-2578	Unaltered	255		TCGA-97-A4M3	Unaltered	65		TCGA-RU-A8FL	Unaltered	22		TCGA-BH-A0HQ	Unaltered	5		TCGA-KC-A7FD	Unaltered	1
TCGA-CV-5439	Unaltered	254		TCGA-18-3410	Unaltered	65		TCGA-19-2625	Unaltered	22		TCGA-BH-A1F8	Unaltered	5		TCGA-KK-A6E2	Unaltered	1
TCGA-G3-AAV0	Unaltered	254		TCGA-66-2783	Unaltered	65		TCGA-CR-6491	Unaltered	22		TCGA-C8-A3M8	Unaltered	5		TCGA-KK-A6E7	Unaltered	1
TCGA-49-AAR2	Unaltered	253		TCGA-3A-A9I9	Unaltered	65		TCGA-A4-7583	Unaltered	22		TCGA-D8-A27M	Unaltered	5		TCGA-KK-A8I4	Unaltered	1
TCGA-B0-5698	Unaltered	252		TCGA-WB-A81V	Unaltered	65		TCGA-G7-6797	Unaltered	22		TCGA-E2-A14P	Unaltered	5		TCGA-KK-A8IH	Unaltered	1
TCGA-BC-A10Z	Unaltered	252		TCGA-KK-A59Z	Unaltered	65		TCGA-IA-A83W	Unaltered	22		TCGA-E2-A154	Unaltered	5		TCGA-M7-A720	Unaltered	1
TCGA-B5-A0JR	Unaltered	252		TCGA-KD-A5QS	Unaltered	65		TCGA-MH-A560	Unaltered	22		TCGA-E2-A1IN	Unaltered	5		TCGA-MG-AAMC	Altered	1
TCGA-D1-A17R	Unaltered	251		TCGA-X6-A7WC	Unaltered	65		TCGA-FV-A2QR	Unaltered	22		TCGA-E2-A576	Unaltered	5		TCGA-QU-A6IM	Unaltered	1
TCGA-B0-5693	Unaltered	250		TCGA-2G-AAEX	Unaltered	65		TCGA-HP-A5MZ	Unaltered	22		TCGA-EW-A1PG	Unaltered	5		TCGA-QU-A6IP	Unaltered	1
TCGA-90-7769	Unaltered	250		TCGA-AP-A0LI	Unaltered	65		TCGA-55-8207	Unaltered	22		TCGA-S3-A6ZG	Unaltered	5		TCGA-TP-A8TT	Unaltered	1
TCGA-CN-6992	Unaltered	248		TCGA-BG-A0MA	Unaltered	65		TCGA-78-7146	Unaltered	22		TCGA-UU-A93S	Unaltered	5		TCGA-V1-A8MF	Unaltered	1
TCGA-77-A5GF	Unaltered	248		TCGA-V4-A9EM	Altered	65		TCGA-95-A4VK	Unaltered	22		TCGA-C5-A1BK	Unaltered	5		TCGA-V1-A9OX	Unaltered	1
TCGA-DU-6394	Unaltered	247		TCGA-E7-A6ME	Unaltered	64		TCGA-22-1011	Unaltered	22		TCGA-C5-A7X3	Unaltered	5		TCGA-VP-A879	Unaltered	1
TCGA-CJ-4643	Unaltered	247		TCGA-DB-A64L	Unaltered	64		TCGA-22-5474	Unaltered	22		TCGA-EK-A2PM	Unaltered	5		TCGA-XK-AAJT	Unaltered	1
TCGA-DD-A11D	Unaltered	247		TCGA-HT-A4DS	Unaltered	64		TCGA-77-8148	Unaltered	22		TCGA-EK-A2RN	Unaltered	5		TCGA-XQ-A8TB	Unaltered	1
TCGA-77-A5G6	Unaltered	246		TCGA-WH-A86K	Unaltered	64		TCGA-EJ-5497	Unaltered	22		TCGA-EX-A8YF	Unaltered	5		TCGA-Y6-A8TL	Unaltered	1
TCGA-AG-A002	Altered	245		TCGA-DS-A0VK	Unaltered	64		TCGA-EJ-7123	Unaltered	22		TCGA-LP-A4AW	Unaltered	5		TCGA-ZG-A8QX	Unaltered	1
TCGA-HT-8105	Unaltered	242		TCGA-EI-6511	Unaltered	64		TCGA-HC-7077	Unaltered	22		TCGA-MA-AA43	Unaltered	5		TCGA-ZG-A9L6	Unaltered	1
TCGA-HE-7128	Unaltered	242		TCGA-AA-3867	Unaltered	64		TCGA-SU-A7E7	Unaltered	22		TCGA-VS-A9UY	Unaltered	5		TCGA-3B-A9I0	Unaltered	1
TCGA-DD-A3A9	Unaltered	242		TCGA-DM-A285	Unaltered	64		TCGA-3B-A9HR	Unaltered	22		TCGA-VS-A9V5	Altered	5		TCGA-DX-A2J0	Unaltered	1
TCGA-DD-AACQ	Unaltered	242		TCGA-A3-3346	Unaltered	64		TCGA-DX-A1KX	Unaltered	22		TCGA-W5-AA2Q	Unaltered	5		TCGA-DX-A3LU	Unaltered	1
TCGA-22-5481	Unaltered	242		TCGA-B8-5162	Unaltered	64		TCGA-DX-AB2O	Unaltered	22		TCGA-W6-AA0S	Unaltered	5		TCGA-DX-A3M1	Unaltered	1
TCGA-49-6743	Unaltered	241		TCGA-DD-A4NB	Unaltered	64		TCGA-QC-A7B5	Unaltered	22		TCGA-AH-6897	Unaltered	5		TCGA-DX-A6B7	Unaltered	1
TCGA-AZ-4315	Altered	240		TCGA-DD-AACB	Unaltered	64		TCGA-XE-AAO3	Unaltered	22		TCGA-DC-6155	Unaltered	5		TCGA-DX-A6BG	Unaltered	1
TCGA-70-6722	Altered	240		TCGA-73-4662	Unaltered	64		TCGA-AJ-A3BK	Unaltered	22		TCGA-DC-6682	Unaltered	5		TCGA-DX-A7ES	Unaltered	1
TCGA-DK-AA6R	Unaltered	239		TCGA-33-6738	Unaltered	64		TCGA-B5-A11X	Unaltered	22		TCGA-EI-6508	Unaltered	5		TCGA-DX-A7EU	Unaltered	1
TCGA-FD-A3B5	Unaltered	239		TCGA-43-A475	Unaltered	64		TCGA-PG-A916	Unaltered	22		TCGA-AA-3502	Unaltered	5		TCGA-DX-AB2Q	Unaltered	1
TCGA-A8-A094	Unaltered	239		TCGA-51-4079	Unaltered	64		TCGA-CF-A27C	Unaltered	21		TCGA-AA-3814	Unaltered	5		TCGA-IE-A4EI	Unaltered	1
TCGA-69-7974	Unaltered	239		TCGA-85-8584	Unaltered	64		TCGA-DK-AA76	Unaltered	21		TCGA-AA-A02E	Unaltered	5		TCGA-IE-A6BZ	Unaltered	1
TCGA-D8-A1JA	Altered	238		TCGA-DX-AB2X	Unaltered	64		TCGA-GC-A3BM	Unaltered	21		TCGA-D5-5539	Unaltered	5		TCGA-MJ-A68H	Unaltered	1
TCGA-73-4675	Unaltered	237		TCGA-2G-AAGJ	Unaltered	64		TCGA-CS-4944	Unaltered	21		TCGA-F4-6805	Unaltered	5		TCGA-QC-AA9N	Unaltered	1
TCGA-L9-A443	Unaltered	237		TCGA-E8-A433	Unaltered	64		TCGA-DU-7012	Unaltered	21		TCGA-FA-A7DS	Unaltered	5		TCGA-X6-A7WA	Unaltered	1
TCGA-B9-A8YH	Unaltered	236		TCGA-AX-A3FV	Unaltered	64		TCGA-FG-6692	Unaltered	21		TCGA-27-2519	Unaltered	5		TCGA-BF-A1PZ	Unaltered	1
TCGA-38-4625	Unaltered	236		TCGA-BT-A2LD	Unaltered	63		TCGA-FG-A711	Unaltered	21		TCGA-06-0130	Unaltered	5		TCGA-D9-A3Z4	Unaltered	1
TCGA-N5-A4RN	Unaltered	236		TCGA-E5-A4TZ	Unaltered	63		TCGA-A2-A04R	Unaltered	21		TCGA-CN-4735	Unaltered	5		TCGA-EB-A1NK	Unaltered	1
TCGA-85-8355	Unaltered	235		TCGA-K4-A83P	Unaltered	63		TCGA-BH-A0C3	Unaltered	21		TCGA-CN-6019	Unaltered	5		TCGA-EB-A3XC	Unaltered	1
TCGA-HW-A5KJ	Unaltered	234		TCGA-XF-A9T5	Unaltered	63		TCGA-C8-A12W	Unaltered	21		TCGA-CQ-6229	Unaltered	5		TCGA-EB-A5FP	Unaltered	1
TCGA-C8-A131	Altered	234		TCGA-RY-A83Y	Unaltered	63		TCGA-C8-A8HQ	Unaltered	21		TCGA-CV-5966	Unaltered	5		TCGA-FS-A1ZN	Unaltered	1
TCGA-UB-A7MB	Unaltered	233		TCGA-S9-A7IZ	Unaltered	63		TCGA-D8-A27G	Altered	21		TCGA-CV-6952	Unaltered	5		TCGA-2G-AAFO	Unaltered	1
TCGA-05-4405	Unaltered	233		TCGA-A2-A3XT	Unaltered	63		TCGA-D8-A73W	Unaltered	21		TCGA-CV-6955	Unaltered	5		TCGA-2G-AAGS	Unaltered	1
TCGA-CV-7252	Unaltered	232		TCGA-E2-A14T	Unaltered	63		TCGA-EK-A2RA	Unaltered	21		TCGA-CV-A6JE	Unaltered	5		TCGA-2G-AAHA	Unaltered	1
TCGA-CZ-5459	Altered	230		TCGA-AG-3890	Unaltered	63		TCGA-GR-A4D4	Unaltered	21		TCGA-F7-A50J	Unaltered	5		TCGA-VF-A8AC	Unaltered	1
TCGA-BQ-5880	Unaltered	230		TCGA-AA-3489	Unaltered	63		TCGA-CN-4736	Unaltered	21		TCGA-A3-3370	Unaltered	5		TCGA-XE-AAOD	Unaltered	1
TCGA-38-4631	Altered	229		TCGA-AA-3976	Unaltered	63		TCGA-CN-5361	Unaltered	21		TCGA-B0-4706	Altered	5		TCGA-XE-AAOL	Unaltered	1
TCGA-58-8386	Unaltered	229		TCGA-AA-3979	Unaltered	63		TCGA-CV-7434	Unaltered	21		TCGA-B0-5690	Altered	5		TCGA-XY-A8S2	Unaltered	1
TCGA-60-2708	Unaltered	228		TCGA-CN-4727	Unaltered	63		TCGA-A3-3311	Altered	21		TCGA-B8-5158	Unaltered	5		TCGA-YU-A94I	Unaltered	1
TCGA-B5-A1MW	Unaltered	227		TCGA-CV-6433	Unaltered	63		TCGA-B0-5085	Unaltered	21		TCGA-BP-5194	Unaltered	5		TCGA-2G-AALO	Unaltered	1
TCGA-DU-7300	Unaltered	226		TCGA-CV-7427	Unaltered	63		TCGA-2Z-A9JL	Altered	21		TCGA-CJ-4644	Unaltered	5		TCGA-3T-AA9L	Unaltered	1
TCGA-BS-A0U7	Unaltered	226		TCGA-CV-7437	Unaltered	63		TCGA-UZ-A9Q1	Unaltered	21		TCGA-CZ-5454	Unaltered	5		TCGA-X7-A8DB	Unaltered	1
TCGA-28-5209	Unaltered	225		TCGA-CV-A465	Unaltered	63		TCGA-DD-AA3A	Unaltered	21		TCGA-MM-A84U	Unaltered	5		TCGA-X7-A8DE	Unaltered	1
TCGA-43-6143	Unaltered	225		TCGA-BP-5192	Unaltered	63		TCGA-DD-AADN	Unaltered	21		TCGA-2Z-A9JJ	Unaltered	5		TCGA-X7-A8M1	Unaltered	1
TCGA-GL-A4EM	Unaltered	224		TCGA-SX-A7SN	Unaltered	63		TCGA-DD-AAEE	Unaltered	21		TCGA-BQ-5876	Altered	5		TCGA-XU-A92U	Unaltered	1
TCGA-SX-A7SS	Unaltered	223		TCGA-WN-A9G9	Unaltered	63		TCGA-50-6592	Unaltered	21		TCGA-IA-A40U	Unaltered	5		TCGA-XU-A92Z	Unaltered	1
TCGA-AR-A24R	Unaltered	222		TCGA-05-4396	Unaltered	63		TCGA-50-7109	Unaltered	21		TCGA-MH-A857	Unaltered	5		TCGA-ZB-A964	Unaltered	1
TCGA-DD-A3A2	Unaltered	222		TCGA-64-1676	Unaltered	63		TCGA-55-8621	Unaltered	21		TCGA-SX-A7SU	Unaltered	5		TCGA-ZB-A96O	Unaltered	1
TCGA-PQ-A6FN	Unaltered	221		TCGA-39-5024	Unaltered	63		TCGA-34-5234	Unaltered	21		TCGA-2Y-A9GV	Unaltered	5		TCGA-ZB-A96Q	Unaltered	1
TCGA-IZ-A6M9	Unaltered	221		TCGA-66-2782	Unaltered	63		TCGA-63-A5MG	Unaltered	21		TCGA-2Y-A9GY	Unaltered	5		TCGA-ZL-A9V6	Unaltered	1
TCGA-SX-A71U	Unaltered	221		TCGA-ZN-A9VS	Unaltered	63		TCGA-63-A5MI	Unaltered	21		TCGA-2Y-A9H2	Unaltered	5		TCGA-BJ-A0ZB	Unaltered	1
TCGA-A3-3317	Unaltered	220		TCGA-XE-AAOF	Unaltered	63		TCGA-85-A511	Unaltered	21		TCGA-2Y-A9H6	Unaltered	5		TCGA-BJ-A191	Unaltered	1
TCGA-B0-5713	Unaltered	220		TCGA-AX-A3G6	Unaltered	63		TCGA-FB-AAPY	Unaltered	21		TCGA-DD-A115	Unaltered	5		TCGA-BJ-A2P4	Unaltered	1
TCGA-DZ-6133	Unaltered	220		TCGA-BS-A0TG	Unaltered	63		TCGA-IB-7893	Unaltered	21		TCGA-DD-A1EH	Unaltered	5		TCGA-BJ-A45H	Unaltered	1
TCGA-B0-5692	Unaltered	219		TCGA-D1-A16I	Unaltered	63		TCGA-DX-A3U8	Unaltered	21		TCGA-DD-AAVZ	Unaltered	5		TCGA-DJ-A2Q3	Unaltered	1
TCGA-56-8629	Altered	218		TCGA-ZF-AA53	Unaltered	62		TCGA-DX-AB2V	Unaltered	21		TCGA-ED-A7XP	Unaltered	5		TCGA-DJ-A3UR	Unaltered	1
TCGA-YC-A89H	Altered	216		TCGA-AN-A0AJ	Unaltered	62		TCGA-2G-AAGM	Unaltered	21		TCGA-EP-A2KB	Unaltered	5		TCGA-DJ-A3UU	Unaltered	1
TCGA-49-AAR4	Unaltered	216		TCGA-AO-A0JJ	Unaltered	62		TCGA-DE-A69J	Unaltered	21		TCGA-FV-A3R3	Unaltered	5		TCGA-E3-A3E1	Unaltered	1
TCGA-55-7570	Unaltered	216		TCGA-PL-A8LZ	Unaltered	62		TCGA-NA-A4R1	Unaltered	21		TCGA-G3-A5SK	Unaltered	5		TCGA-E3-A3E3	Unaltered	1
TCGA-DU-A7TA	Altered	215		TCGA-AY-4071	Unaltered	62		TCGA-A5-A2K2	Unaltered	21		TCGA-NI-A8LF	Unaltered	5		TCGA-EL-A3GY	Unaltered	1
TCGA-UY-A9PD	Unaltered	214		TCGA-CA-5254	Unaltered	62		TCGA-D1-A16B	Unaltered	21		TCGA-QA-A7B7	Unaltered	5		TCGA-EL-A3MX	Unaltered	1
TCGA-CJ-4923	Altered	214		TCGA-12-5295	Unaltered	62		TCGA-CF-A1HS	Altered	20		TCGA-RC-A7S9	Unaltered	5		TCGA-EM-A1CW	Unaltered	1
TCGA-05-4397	Unaltered	214		TCGA-CR-5247	Unaltered	62		TCGA-YC-A9TC	Unaltered	20		TCGA-44-2662	Unaltered	5		TCGA-EM-A22Q	Unaltered	1
TCGA-FD-A43X	Unaltered	213		TCGA-A3-3382	Unaltered	62		TCGA-HT-7857	Unaltered	20		TCGA-49-4494	Unaltered	5		TCGA-EM-A2P2	Unaltered	1
TCGA-75-5122	Unaltered	213		TCGA-Y8-A895	Unaltered	62		TCGA-A8-A07L	Unaltered	20		TCGA-49-6745	Unaltered	5		TCGA-EM-A3AR	Unaltered	1
TCGA-99-7458	Unaltered	213		TCGA-75-7031	Unaltered	62		TCGA-D8-A1X8	Altered	20		TCGA-50-5055	Unaltered	5		TCGA-EM-A3FR	Unaltered	1
TCGA-HT-7875	Unaltered	212		TCGA-43-A56V	Unaltered	62		TCGA-E2-A1IH	Unaltered	20		TCGA-50-5935	Unaltered	5		TCGA-ET-A2N3	Unaltered	1
TCGA-CV-5430	Unaltered	212		TCGA-77-8150	Unaltered	62		TCGA-E2-A1LS	Unaltered	20		TCGA-55-7815	Unaltered	5		TCGA-FK-A3S3	Unaltered	1
TCGA-55-6969	Unaltered	212		TCGA-EL-A3CX	Unaltered	62		TCGA-AG-3881	Unaltered	20		TCGA-64-5815	Unaltered	5		TCGA-FY-A3ON	Unaltered	1
TCGA-44-8117	Unaltered	210		TCGA-BG-A0MK	Unaltered	62		TCGA-AG-3898	Unaltered	20		TCGA-97-7941	Altered	5		TCGA-FY-A76V	Unaltered	1
TCGA-69-7980	Unaltered	210		TCGA-D1-A15V	Unaltered	62		TCGA-DC-4749	Unaltered	20		TCGA-MP-A4TE	Unaltered	5		TCGA-MK-A84Z	Unaltered	1
TCGA-C8-A134	Unaltered	209		TCGA-EO-A1Y5	Unaltered	62		TCGA-AA-3850	Unaltered	20		TCGA-96-8170	Unaltered	5		TCGA-N5-A4RM	Unaltered	1
TCGA-B9-4113	Unaltered	209		TCGA-V4-A9EC	Unaltered	62		TCGA-CM-4750	Unaltered	20		TCGA-MQ-A6BS	Altered	5		TCGA-N5-A4RO	Unaltered	1
TCGA-DD-AACF	Unaltered	209		TCGA-CF-A9FL	Unaltered	61		TCGA-D5-5540	Unaltered	20		TCGA-SH-A7BD	Altered	5		TCGA-N6-A4VG	Unaltered	1
TCGA-AK-3451	Unaltered	208		TCGA-K4-A54R	Unaltered	61		TCGA-12-1597	Unaltered	20		TCGA-UD-AAC4	Unaltered	5		TCGA-N7-A4Y5	Unaltered	1
TCGA-2Z-A9JG	Unaltered	208		TCGA-XF-AAMQ	Unaltered	61		TCGA-28-5207	Unaltered	20		TCGA-2J-AABA	Unaltered	5		TCGA-N8-A4PN	Unaltered	1
TCGA-39-5011	Unaltered	207		TCGA-JW-A5VH	Unaltered	61		TCGA-BA-A4IF	Unaltered	20		TCGA-2J-AABE	Unaltered	5		TCGA-NF-A4WU	Unaltered	1
TCGA-77-7465	Unaltered	207		TCGA-D5-6932	Unaltered	61		TCGA-CN-A498	Unaltered	20		TCGA-H6-A45N	Unaltered	5		TCGA-A5-A0GV	Unaltered	1
TCGA-X2-A95T	Unaltered	207		TCGA-FF-8041	Unaltered	61		TCGA-CR-6467	Unaltered	20		TCGA-IB-7885	Unaltered	5		TCGA-A5-A0GX	Unaltered	1
TCGA-B0-5095	Unaltered	206		TCGA-UF-A719	Unaltered	61		TCGA-CV-7183	Unaltered	20		TCGA-YY-A8LH	Unaltered	5		TCGA-A5-A3LO	Unaltered	1
TCGA-34-8455	Unaltered	206		TCGA-B2-4101	Altered	61		TCGA-CV-7245	Unaltered	20		TCGA-CH-5753	Unaltered	5		TCGA-AJ-A3I9	Unaltered	1
TCGA-E2-A1LA	Unaltered	205		TCGA-CZ-4866	Unaltered	61		TCGA-CV-7263	Unaltered	20		TCGA-CH-5762	Unaltered	5		TCGA-AJ-A3NF	Unaltered	1
TCGA-NK-A5CT	Unaltered	205		TCGA-2Z-A9J3	Unaltered	61		TCGA-CV-7410	Unaltered	20		TCGA-EJ-5532	Unaltered	5		TCGA-AP-A1DQ	Unaltered	1
TCGA-B5-A3FB	Unaltered	205		TCGA-BQ-5877	Altered	61		TCGA-CV-A6JM	Unaltered	20		TCGA-G9-6338	Unaltered	5		TCGA-AP-A1E4	Unaltered	1
TCGA-BS-A0UF	Altered	205		TCGA-J7-6720	Unaltered	61		TCGA-CV-A6JN	Unaltered	20		TCGA-G9-6373	Unaltered	5		TCGA-AX-A1CC	Unaltered	1
TCGA-BK-A0C9	Altered	203		TCGA-2Y-A9H7	Unaltered	61		TCGA-CX-A4AQ	Unaltered	20		TCGA-HC-7738	Unaltered	5		TCGA-AX-A3FZ	Unaltered	1
TCGA-55-8514	Unaltered	202		TCGA-NI-A4U2	Unaltered	61		TCGA-DQ-5625	Unaltered	20		TCGA-V1-A9Z7	Unaltered	5		TCGA-B5-A0K3	Unaltered	1
TCGA-A2-A0T0	Unaltered	201		TCGA-05-5428	Unaltered	61		TCGA-KL-8329	Unaltered	20		TCGA-VN-A88R	Unaltered	5		TCGA-B5-A0K7	Unaltered	1
TCGA-38-4632	Unaltered	201		TCGA-49-AARO	Unaltered	61		TCGA-CJ-6028	Altered	20		TCGA-VP-A87C	Unaltered	5		TCGA-B5-A11F	Unaltered	1
TCGA-QU-A6IL	Unaltered	201		TCGA-78-7145	Unaltered	61		TCGA-CZ-5461	Altered	20		TCGA-XJ-A83G	Unaltered	5		TCGA-B5-A11P	Unaltered	1
TCGA-CK-6747	Unaltered	199		TCGA-86-8359	Unaltered	61		TCGA-A4-7286	Unaltered	20		TCGA-XK-AAIR	Unaltered	5		TCGA-B5-A11Z	Unaltered	1
TCGA-NH-A8F8	Unaltered	199		TCGA-L4-A4E5	Unaltered	61		TCGA-BC-4073	Unaltered	20		TCGA-ZG-A9L0	Unaltered	5		TCGA-BG-A0VV	Unaltered	1
TCGA-DX-AB32	Unaltered	199		TCGA-EJ-5495	Unaltered	61		TCGA-DD-A116	Unaltered	20		TCGA-3B-A9HI	Unaltered	5		TCGA-BG-A3PP	Unaltered	1
TCGA-EA-A3HQ	Unaltered	198		TCGA-WK-A8Y0	Unaltered	61		TCGA-GJ-A3OU	Unaltered	20		TCGA-DX-A1L0	Unaltered	5		TCGA-BK-A4ZD	Unaltered	1
TCGA-G7-A8LB	Unaltered	198		TCGA-AJ-A3NG	Unaltered	61		TCGA-44-A47A	Unaltered	20		TCGA-DX-A3UB	Unaltered	5		TCGA-BK-A56F	Unaltered	1
TCGA-DD-A1EI	Unaltered	198		TCGA-B5-A0JY	Altered	61		TCGA-55-A494	Unaltered	20		TCGA-DX-A8BZ	Unaltered	5		TCGA-BS-A0TD	Unaltered	1
TCGA-A3-3385	Unaltered	197		TCGA-JU-AAVI	Unaltered	61		TCGA-62-A46R	Unaltered	20		TCGA-DX-AB3C	Unaltered	5		TCGA-D1-A0ZZ	Unaltered	1
TCGA-NJ-A55R	Unaltered	197		TCGA-FD-A3SO	Unaltered	60		TCGA-34-2596	Unaltered	20		TCGA-IE-A4EJ	Unaltered	5		TCGA-D1-A102	Unaltered	1
TCGA-UY-A78N	Unaltered	195		TCGA-DU-A7T6	Unaltered	60		TCGA-60-2710	Unaltered	20		TCGA-KD-A5QU	Unaltered	5		TCGA-D1-A165	Unaltered	1
TCGA-37-4130	Unaltered	195		TCGA-F6-A8O3	Unaltered	60		TCGA-77-7338	Unaltered	20		TCGA-QQ-A8VG	Unaltered	5		TCGA-D1-A16S	Unaltered	1
TCGA-D6-8569	Unaltered	194		TCGA-HT-7475	Unaltered	60		TCGA-FC-A6HD	Unaltered	20		TCGA-SI-A71Q	Unaltered	5		TCGA-D1-A17L	Unaltered	1
TCGA-CJ-5678	Altered	194		TCGA-S9-A6WI	Unaltered	60		TCGA-V1-A9ZK	Unaltered	20		TCGA-SI-AA8B	Unaltered	5		TCGA-D1-A2G7	Unaltered	1
TCGA-CJ-5683	Unaltered	194		TCGA-S9-A6WN	Unaltered	60		TCGA-FX-A3RE	Unaltered	20		TCGA-UE-A6QU	Unaltered	5		TCGA-E6-A8L9	Unaltered	1
TCGA-MN-A4N1	Unaltered	194		TCGA-A2-A0T7	Unaltered	60		TCGA-2G-AAGO	Unaltered	20		TCGA-D3-A5GT	Unaltered	5		TCGA-EO-A3KU	Unaltered	1
TCGA-G2-A2EF	Unaltered	193		TCGA-CK-6751	Unaltered	60		TCGA-4V-A9QR	Unaltered	20		TCGA-2G-AAG8	Unaltered	5		TCGA-EY-A72D	Unaltered	1
TCGA-PE-A5DC	Unaltered	193		TCGA-CQ-5323	Unaltered	60		TCGA-A5-A0GJ	Unaltered	20		TCGA-SN-A84Y	Unaltered	5		TCGA-KP-A3W3	Unaltered	1
TCGA-B0-5712	Unaltered	193		TCGA-CV-7238	Unaltered	60		TCGA-AP-A1E3	Unaltered	20		TCGA-XE-A8H5	Unaltered	5		TCGA-PG-A7D5	Unaltered	1
TCGA-64-5778	Unaltered	193		TCGA-CV-7438	Altered	60		TCGA-B5-A0JX	Unaltered	20		TCGA-X7-A8M3	Unaltered	5		TCGA-SL-A6J9	Unaltered	1
TCGA-BG-A0M0	Unaltered	193		TCGA-DD-AAD5	Unaltered	60		TCGA-D1-A16O	Unaltered	20		TCGA-XU-A92T	Unaltered	5		TCGA-V4-A9EE	Unaltered	1
TCGA-C8-A26X	Unaltered	192		TCGA-RC-A7SF	Unaltered	60		TCGA-CF-A8HX	Unaltered	19		TCGA-EL-A3CT	Unaltered	5		TCGA-V3-A9ZY	Unaltered	1
TCGA-BP-4964	Unaltered	192		TCGA-49-6767	Unaltered	60		TCGA-DK-AA6Q	Unaltered	19		TCGA-EL-A3CU	Unaltered	5		TCGA-V4-A9F1	Unaltered	1
TCGA-T7-A92I	Unaltered	192		TCGA-55-6984	Unaltered	60		TCGA-K4-A5RJ	Unaltered	19		TCGA-EL-A3H1	Unaltered	5		TCGA-V4-A9EH	Unaltered	1
TCGA-P4-A5E8	Unaltered	192		TCGA-78-7161	Unaltered	60		TCGA-ZF-A9RN	Unaltered	19		TCGA-EL-A4KI	Unaltered	5		TCGA-V4-A9EW	Unaltered	1
TCGA-46-3768	Altered	192		TCGA-HZ-8005	Unaltered	60		TCGA-ZF-AA4R	Unaltered	19		TCGA-EM-A1CU	Unaltered	5		TCGA-VD-AA8N	Unaltered	1
TCGA-NC-A5HN	Unaltered	192		TCGA-ZM-AA0D	Unaltered	60		TCGA-DH-5140	Altered	19		TCGA-EM-A1YB	Unaltered	5		TCGA-OR-A5J8	Unaltered	0
TCGA-D6-A6EK	Unaltered	191		TCGA-EY-A1GS	Altered	60		TCGA-DU-6405	Unaltered	19		TCGA-EM-A3O7	Unaltered	5		TCGA-OR-A5JF	Unaltered	0
TCGA-B4-5838	Unaltered	191		TCGA-VD-A8KI	Unaltered	60		TCGA-HT-7676	Unaltered	19		TCGA-AP-A05J	Unaltered	5		TCGA-OR-A5JT	Unaltered	0
TCGA-CC-A8HV	Altered	191		TCGA-BT-A2LB	Unaltered	59		TCGA-A7-A4SE	Unaltered	19		TCGA-AX-A06B	Unaltered	5		TCGA-OR-A5JX	Unaltered	0
TCGA-43-6770	Unaltered	191		TCGA-G2-A2EL	Unaltered	59		TCGA-AR-A250	Unaltered	19		TCGA-AX-A1C8	Unaltered	5		TCGA-OR-A5JZ	Unaltered	0
TCGA-AP-A056	Altered	191		TCGA-GU-A763	Unaltered	59		TCGA-C8-A12L	Unaltered	19		TCGA-AX-A1CN	Unaltered	5		TCGA-OR-A5KU	Unaltered	0
TCGA-CJ-6030	Unaltered	190		TCGA-HW-A5KM	Unaltered	59		TCGA-C8-A12O	Unaltered	19		TCGA-B5-A3FH	Unaltered	5		TCGA-OR-A5KW	Unaltered	0
TCGA-DX-AB3A	Unaltered	190		TCGA-BH-A0C1	Unaltered	59		TCGA-E2-A1B6	Unaltered	19		TCGA-BK-A0CA	Unaltered	5		TCGA-OR-A5KZ	Unaltered	0
TCGA-UY-A78K	Unaltered	189		TCGA-E9-A1NC	Altered	59		TCGA-E9-A1R5	Unaltered	19		TCGA-BS-A0TC	Unaltered	5		TCGA-OR-A5L9	Unaltered	0
TCGA-56-8083	Unaltered	189		TCGA-AA-3675	Unaltered	59		TCGA-EW-A1OV	Unaltered	19		TCGA-D1-A0ZU	Unaltered	5		TCGA-OR-A5LC	Unaltered	0
TCGA-66-2780	Unaltered	189		TCGA-BA-A4IG	Unaltered	59		TCGA-OL-A66H	Unaltered	19		TCGA-D1-A16E	Unaltered	5		TCGA-OR-A5LG	Unaltered	0
TCGA-AO-A0J6	Unaltered	188		TCGA-BB-A6UO	Unaltered	59		TCGA-EK-A2RB	Unaltered	19		TCGA-EO-A22Y	Unaltered	5		TCGA-OR-A5LK	Unaltered	0
TCGA-AG-4022	Unaltered	188		TCGA-CN-A63W	Unaltered	59		TCGA-MA-AA3Z	Unaltered	19		TCGA-FI-A2EY	Unaltered	5		TCGA-PK-A5HA	Unaltered	0
TCGA-GL-A9DE	Altered	188		TCGA-CC-A5UC	Unaltered	59		TCGA-AA-3852	Unaltered	19		TCGA-KP-A3W0	Unaltered	5		TCGA-BT-A20U	Unaltered	0
TCGA-75-6214	Altered	188		TCGA-EP-A2KC	Unaltered	59		TCGA-19-2619	Unaltered	19		TCGA-WC-A885	Unaltered	5		TCGA-C4-A0F1	Unaltered	0
TCGA-O2-A5IB	Unaltered	188		TCGA-44-7659	Unaltered	59		TCGA-19-5960	Unaltered	19		TCGA-VD-A8KH	Unaltered	5		TCGA-CF-A7I0	Unaltered	0
TCGA-28-2509	Unaltered	186		TCGA-55-8204	Altered	59		TCGA-CN-4723	Unaltered	19		TCGA-OR-A5JD	Unaltered	4		TCGA-CF-A9FH	Unaltered	0
TCGA-KN-8436	Unaltered	186		TCGA-43-3394	Unaltered	59		TCGA-CN-5373	Unaltered	19		TCGA-BT-A42F	Unaltered	4		TCGA-DK-A1AA	Unaltered	0
TCGA-P4-A5EA	Unaltered	186		TCGA-66-2742	Unaltered	59		TCGA-CV-A6K2	Unaltered	19		TCGA-CU-A72E	Unaltered	4		TCGA-DK-A3IM	Unaltered	0
TCGA-55-A492	Unaltered	186		TCGA-HC-7749	Unaltered	59		TCGA-P3-A6T4	Unaltered	19		TCGA-DK-A3IL	Unaltered	4		TCGA-DK-AA6T	Unaltered	0
TCGA-69-7978	Unaltered	186		TCGA-A5-A1OH	Unaltered	59		TCGA-P3-A6T8	Unaltered	19		TCGA-DK-A3IU	Unaltered	4		TCGA-DK-AA6X	Unaltered	0
TCGA-60-2724	Unaltered	186		TCGA-GV-A3JX	Unaltered	58		TCGA-A3-3363	Unaltered	19		TCGA-DK-A3IV	Unaltered	4		TCGA-E7-A7DV	Unaltered	0
TCGA-06-5412	Unaltered	185		TCGA-A2-A0YD	Unaltered	58		TCGA-B0-5113	Unaltered	19		TCGA-FD-A3N6	Unaltered	4		TCGA-E7-A7PW	Unaltered	0
TCGA-66-2757	Unaltered	185		TCGA-A2-A0YK	Unaltered	58		TCGA-B0-5694	Unaltered	19		TCGA-GD-A3OS	Unaltered	4		TCGA-FD-A5BT	Unaltered	0
TCGA-HB-A2OT	Unaltered	185		TCGA-D8-A1JL	Unaltered	58		TCGA-BP-5000	Unaltered	19		TCGA-GU-A766	Unaltered	4		TCGA-FD-A5BX	Unaltered	0
TCGA-CV-6948	Unaltered	184		TCGA-E9-A5FL	Unaltered	58		TCGA-DD-A3A8	Unaltered	19		TCGA-GU-AATQ	Unaltered	4		TCGA-GC-A3WC	Unaltered	0
TCGA-C8-A26Y	Unaltered	183		TCGA-LP-A4AV	Unaltered	58		TCGA-DD-AACJ	Unaltered	19		TCGA-XF-A9SH	Unaltered	4		TCGA-GC-A6I3	Unaltered	0
TCGA-22-5489	Unaltered	183		TCGA-FF-A7CR	Unaltered	58		TCGA-ZS-A9CE	Unaltered	19		TCGA-DB-5270	Unaltered	4		TCGA-GD-A76B	Unaltered	0
TCGA-CV-6959	Unaltered	182		TCGA-CN-4726	Unaltered	58		TCGA-50-5944	Unaltered	19		TCGA-DB-A4XC	Unaltered	4		TCGA-K4-A3WV	Unaltered	0
TCGA-CJ-4905	Unaltered	182		TCGA-BP-4970	Unaltered	58		TCGA-55-6983	Unaltered	19		TCGA-DU-7007	Unaltered	4		TCGA-XF-A9SV	Unaltered	0
TCGA-85-A510	Unaltered	182		TCGA-CW-5583	Unaltered	58		TCGA-86-6851	Unaltered	19		TCGA-DU-7301	Unaltered	4		TCGA-XF-AAN1	Unaltered	0
TCGA-B0-5705	Unaltered	181		TCGA-CZ-5451	Unaltered	58		TCGA-91-7771	Unaltered	19		TCGA-DU-8166	Unaltered	4		TCGA-CS-4938	Unaltered	0
TCGA-A5-A0G9	Unaltered	181		TCGA-B9-A5W9	Unaltered	58		TCGA-52-7810	Unaltered	19		TCGA-E1-A7YW	Unaltered	4		TCGA-CS-4943	Unaltered	0
TCGA-CJ-5686	Unaltered	180		TCGA-BQ-7053	Unaltered	58		TCGA-90-A4EE	Unaltered	19		TCGA-FG-8188	Unaltered	4		TCGA-CS-5395	Unaltered	0
TCGA-UZ-A9PR	Unaltered	180		TCGA-CC-A7IH	Unaltered	58		TCGA-MQ-A6BQ	Unaltered	19		TCGA-HT-7692	Unaltered	4		TCGA-CS-5397	Unaltered	0
TCGA-44-2656	Unaltered	180		TCGA-CC-A9FW	Unaltered	58		TCGA-TS-A7OU	Unaltered	19		TCGA-HT-7693	Unaltered	4		TCGA-CS-6186	Unaltered	0
TCGA-58-A46J	Unaltered	180		TCGA-44-7672	Unaltered	58		TCGA-EJ-7781	Unaltered	19		TCGA-HT-8104	Unaltered	4		TCGA-CS-6188	Unaltered	0
TCGA-85-A53L	Unaltered	180		TCGA-55-7911	Unaltered	58		TCGA-DX-AB2W	Unaltered	19		TCGA-HT-A614	Unaltered	4		TCGA-CS-6666	Unaltered	0
TCGA-92-7340	Unaltered	180		TCGA-94-7033	Unaltered	58		TCGA-EB-A3XF	Unaltered	19		TCGA-S9-A6U5	Unaltered	4		TCGA-DB-A4XA	Unaltered	0
TCGA-A8-A08R	Unaltered	179		TCGA-EJ-7785	Unaltered	58		TCGA-N8-A4PL	Unaltered	19		TCGA-S9-A6U9	Unaltered	4		TCGA-DH-A66F	Unaltered	0
TCGA-ED-A459	Unaltered	179		TCGA-YL-A8SR	Unaltered	58		TCGA-A5-A7WK	Altered	19		TCGA-S9-A6WQ	Unaltered	4		TCGA-DH-A66G	Unaltered	0
TCGA-73-4670	Unaltered	179		TCGA-B5-A1N2	Unaltered	58		TCGA-BG-A0M3	Unaltered	19		TCGA-S9-A7IX	Unaltered	4		TCGA-DH-A7UU	Unaltered	0
TCGA-EK-A3GK	Altered	178		TCGA-BK-A26L	Unaltered	58		TCGA-EY-A3L3	Unaltered	19		TCGA-S9-A7R3	Unaltered	4		TCGA-DU-5847	Unaltered	0
TCGA-A4-8517	Unaltered	178		TCGA-DK-A6B6	Altered	57		TCGA-FI-A2EU	Unaltered	19		TCGA-VM-A8CA	Unaltered	4		TCGA-DU-5852	Unaltered	0
TCGA-BD-A3EP	Unaltered	178		TCGA-XF-A8HE	Unaltered	57		TCGA-V4-A9EF	Unaltered	19		TCGA-A1-A0SP	Unaltered	4		TCGA-DU-5855	Unaltered	0
TCGA-86-7713	Unaltered	177		TCGA-XF-A9T2	Unaltered	57		TCGA-DK-A1AG	Unaltered	18		TCGA-A2-A0YE	Unaltered	4		TCGA-DU-5874	Unaltered	0
TCGA-77-8140	Unaltered	177		TCGA-DB-A4XG	Unaltered	57		TCGA-DK-A3IQ	Unaltered	18		TCGA-A2-A25A	Unaltered	4		TCGA-DU-6408	Unaltered	0
TCGA-EO-A3B0	Altered	177		TCGA-A1-A0SQ	Unaltered	57		TCGA-DK-AA6W	Unaltered	18		TCGA-A7-A2KD	Unaltered	4		TCGA-DU-6410	Unaltered	0
TCGA-OR-A5JB	Unaltered	176		TCGA-AQ-A04J	Unaltered	57		TCGA-ZF-A9RL	Unaltered	18		TCGA-A7-A6VV	Unaltered	4		TCGA-DU-6542	Unaltered	0
TCGA-DK-A1AC	Unaltered	176		TCGA-B6-A0IA	Unaltered	57		TCGA-ZF-AA4T	Unaltered	18		TCGA-A8-A06T	Unaltered	4		TCGA-DU-7009	Unaltered	0
TCGA-E2-A14W	Unaltered	176		TCGA-LL-A6FR	Unaltered	57		TCGA-DB-5280	Unaltered	18		TCGA-A8-A07U	Unaltered	4		TCGA-DU-7290	Unaltered	0
TCGA-2Z-A9JD	Unaltered	176		TCGA-BA-7269	Altered	57		TCGA-HT-7882	Unaltered	18		TCGA-A8-A09M	Unaltered	4		TCGA-DU-7292	Unaltered	0
TCGA-MI-A75G	Unaltered	176		TCGA-D6-6827	Unaltered	57		TCGA-P5-A5F0	Unaltered	18		TCGA-AC-A5XU	Unaltered	4		TCGA-DU-7309	Unaltered	0
TCGA-49-AARN	Altered	176		TCGA-CZ-4853	Unaltered	57		TCGA-TQ-A7RF	Unaltered	18		TCGA-AC-A6NO	Unaltered	4		TCGA-DU-8158	Unaltered	0
TCGA-HT-7688	Unaltered	175		TCGA-BQ-5888	Unaltered	57		TCGA-W9-A837	Unaltered	18		TCGA-AN-A0AS	Unaltered	4		TCGA-DU-8165	Unaltered	0
TCGA-5P-A9KE	Unaltered	175		TCGA-DW-5560	Unaltered	57		TCGA-A2-A0SW	Unaltered	18		TCGA-AN-A0FY	Unaltered	4		TCGA-DU-A5TS	Unaltered	0
TCGA-A8-A06O	Unaltered	174		TCGA-GL-7773	Unaltered	57		TCGA-A7-A56D	Unaltered	18		TCGA-AO-A12G	Unaltered	4		TCGA-E1-A7YD	Unaltered	0
TCGA-AO-A0J3	Unaltered	174		TCGA-DD-AAEH	Unaltered	57		TCGA-AN-A04D	Unaltered	18		TCGA-AQ-A54O	Unaltered	4		TCGA-E1-A7Z2	Unaltered	0
TCGA-CV-6960	Unaltered	174		TCGA-05-5715	Unaltered	57		TCGA-AO-A1KR	Unaltered	18		TCGA-AR-A1AV	Unaltered	4		TCGA-EZ-7264	Unaltered	0
TCGA-TM-A7CA	Unaltered	173		TCGA-62-8395	Unaltered	57		TCGA-D8-A1JG	Unaltered	18		TCGA-B6-A0IJ	Unaltered	4		TCGA-F6-A8O4	Unaltered	0
TCGA-AG-3732	Unaltered	173		TCGA-69-7765	Unaltered	57		TCGA-E9-A1RF	Unaltered	18		TCGA-B6-A0IK	Unaltered	4		TCGA-FG-7634	Unaltered	0
TCGA-DW-7839	Unaltered	173		TCGA-91-8497	Unaltered	57		TCGA-GM-A2DF	Unaltered	18		TCGA-B6-A0IM	Unaltered	4		TCGA-FG-8182	Unaltered	0
TCGA-44-7660	Unaltered	173		TCGA-MP-A4T4	Unaltered	57		TCGA-HN-A2NL	Unaltered	18		TCGA-B6-A0RM	Unaltered	4		TCGA-FG-8185	Unaltered	0
TCGA-97-7547	Unaltered	173		TCGA-56-8622	Unaltered	57		TCGA-C5-A7CH	Unaltered	18		TCGA-B6-A1KF	Unaltered	4		TCGA-FG-A4MU	Unaltered	0
TCGA-99-8033	Unaltered	173		TCGA-77-7335	Unaltered	57		TCGA-DS-A0VN	Unaltered	18		TCGA-BH-A1FL	Unaltered	4		TCGA-FG-A4MY	Unaltered	0
TCGA-33-4533	Unaltered	173		TCGA-85-8353	Unaltered	57		TCGA-JW-AAVH	Unaltered	18		TCGA-BH-A42U	Unaltered	4		TCGA-FG-A6J1	Unaltered	0
TCGA-XF-A8HG	Unaltered	172		TCGA-98-8023	Unaltered	57		TCGA-AG-3882	Unaltered	18		TCGA-C8-A130	Unaltered	4		TCGA-FG-A70Y	Unaltered	0
TCGA-DC-5869	Unaltered	172		TCGA-HV-AA8X	Unaltered	57		TCGA-AA-3812	Unaltered	18		TCGA-D8-A142	Unaltered	4		TCGA-HT-7468	Unaltered	0
TCGA-CJ-5682	Altered	172		TCGA-EJ-A65D	Unaltered	57		TCGA-CA-6716	Unaltered	18		TCGA-D8-A1JF	Unaltered	4		TCGA-HT-7605	Unaltered	0
TCGA-CZ-4863	Unaltered	172		TCGA-ZG-A8QZ	Unaltered	57		TCGA-D5-6541	Unaltered	18		TCGA-D8-A1JU	Unaltered	4		TCGA-HT-7606	Unaltered	0
TCGA-34-8454	Unaltered	172		TCGA-WZ-A7V3	Unaltered	57		TCGA-BA-A6DE	Unaltered	18		TCGA-D8-A1XU	Unaltered	4		TCGA-HT-7620	Unaltered	0
TCGA-85-A4JB	Unaltered	172		TCGA-BT-A0S7	Unaltered	56		TCGA-F7-A50I	Unaltered	18		TCGA-E2-A14V	Altered	4		TCGA-HT-7854	Unaltered	0
TCGA-B0-5080	Unaltered	171		TCGA-E7-A7XN	Altered	56		TCGA-F7-A61S	Unaltered	18		TCGA-E2-A156	Unaltered	4		TCGA-HT-7874	Unaltered	0
TCGA-P4-A5E7	Unaltered	171		TCGA-FT-A3EE	Unaltered	56		TCGA-HD-A6I0	Unaltered	18		TCGA-E2-A1IO	Unaltered	4		TCGA-HT-7881	Unaltered	0
TCGA-2Y-A9H9	Unaltered	171		TCGA-AO-A0JB	Unaltered	56		TCGA-A3-3316	Unaltered	18		TCGA-E2-A1LL	Unaltered	4		TCGA-HT-7884	Unaltered	0
TCGA-WJ-A86L	Unaltered	171		TCGA-AR-A1AT	Unaltered	56		TCGA-B0-5109	Unaltered	18		TCGA-E9-A5FK	Unaltered	4		TCGA-HT-A5R7	Unaltered	0
TCGA-44-6145	Unaltered	170		TCGA-BH-A0DK	Unaltered	56		TCGA-B4-5834	Unaltered	18		TCGA-EW-A1IW	Unaltered	4		TCGA-HT-A615	Unaltered	0
TCGA-77-A5G1	Unaltered	170		TCGA-BH-A0H6	Unaltered	56		TCGA-CZ-4864	Unaltered	18		TCGA-EW-A1OZ	Unaltered	4		TCGA-HT-A616	Unaltered	0
TCGA-O2-A52Q	Unaltered	170		TCGA-E9-A54Y	Unaltered	56		TCGA-A4-8630	Unaltered	18		TCGA-EW-A1PH	Unaltered	4		TCGA-HT-A618	Unaltered	0
TCGA-2G-AALR	Unaltered	170		TCGA-ZJ-AAXB	Unaltered	56		TCGA-GL-8500	Unaltered	18		TCGA-GM-A2DC	Unaltered	4		TCGA-HT-A61B	Unaltered	0
TCGA-B5-A0K4	Unaltered	169		TCGA-AG-4008	Unaltered	56		TCGA-J7-8537	Unaltered	18		TCGA-GM-A5PX	Unaltered	4		TCGA-HW-7489	Unaltered	0
TCGA-AR-A251	Unaltered	168		TCGA-G5-6641	Unaltered	56		TCGA-CC-5264	Unaltered	18		TCGA-LL-A73Y	Unaltered	4		TCGA-IK-7675	Unaltered	0
TCGA-FD-A43N	Unaltered	167		TCGA-AA-3685	Unaltered	56		TCGA-DD-AACX	Unaltered	18		TCGA-S3-A6ZH	Unaltered	4		TCGA-KT-A74X	Unaltered	0
TCGA-UY-A8OD	Unaltered	167		TCGA-NH-A50U	Unaltered	56		TCGA-G3-A3CK	Unaltered	18		TCGA-WT-AB44	Unaltered	4		TCGA-QH-A6CZ	Unaltered	0
TCGA-QG-A5Z1	Unaltered	167		TCGA-Y8-A894	Unaltered	56		TCGA-G3-AAV6	Unaltered	18		TCGA-C5-A1ME	Unaltered	4		TCGA-QH-A6X5	Unaltered	0
TCGA-2Z-A9J5	Unaltered	167		TCGA-2Y-A9H3	Unaltered	56		TCGA-86-7714	Altered	18		TCGA-EA-A6QX	Unaltered	4		TCGA-QH-A6X9	Altered	0
TCGA-IA-A83S	Unaltered	167		TCGA-21-5782	Unaltered	56		TCGA-18-3414	Unaltered	18		TCGA-EX-A3L1	Unaltered	4		TCGA-QH-A6XA	Unaltered	0
TCGA-BC-A10U	Unaltered	167		TCGA-77-8154	Unaltered	56		TCGA-22-1005	Unaltered	18		TCGA-IR-A3L7	Unaltered	4		TCGA-R8-A6ML	Unaltered	0
TCGA-85-7844	Unaltered	167		TCGA-85-8352	Unaltered	56		TCGA-22-5480	Unaltered	18		TCGA-LP-A7HU	Unaltered	4		TCGA-RY-A843	Unaltered	0
TCGA-ZN-A9VV	Altered	167		TCGA-L3-A4E7	Unaltered	56		TCGA-60-2719	Unaltered	18		TCGA-Q1-A5R2	Unaltered	4		TCGA-RY-A847	Unaltered	0
TCGA-A7-A6VW	Unaltered	166		TCGA-EJ-5499	Unaltered	56		TCGA-96-8169	Unaltered	18		TCGA-Q1-A6DT	Unaltered	4		TCGA-S9-A6U6	Unaltered	0
TCGA-UZ-A9PL	Unaltered	166		TCGA-G9-6499	Unaltered	56		TCGA-98-8022	Unaltered	18		TCGA-VS-A8EG	Unaltered	4		TCGA-S9-A7IQ	Unaltered	0
TCGA-DD-AAE7	Unaltered	166		TCGA-V1-A9Z8	Unaltered	56		TCGA-3U-A98I	Unaltered	18		TCGA-VS-A952	Unaltered	4		TCGA-S9-A7IS	Unaltered	0
TCGA-DD-AAVY	Unaltered	166		TCGA-XJ-A9DX	Unaltered	56		TCGA-HC-8256	Unaltered	18		TCGA-VS-A9V1	Unaltered	4		TCGA-S9-A7QW	Unaltered	0
TCGA-78-7537	Unaltered	166		TCGA-EB-A5UM	Unaltered	56		TCGA-KK-A59X	Unaltered	18		TCGA-ZJ-AAX8	Unaltered	4		TCGA-S9-A7R8	Unaltered	0
TCGA-97-A4M0	Unaltered	166		TCGA-ZB-A962	Unaltered	56		TCGA-ZG-A9L5	Unaltered	18		TCGA-AG-A01L	Unaltered	4		TCGA-TM-A7C3	Unaltered	0
TCGA-63-A5MB	Altered	166		TCGA-N7-A59B	Unaltered	56		TCGA-X6-A7W8	Unaltered	18		TCGA-AG-A020	Unaltered	4		TCGA-TM-A7C4	Unaltered	0
TCGA-AA-A010	Unaltered	165		TCGA-D1-A168	Unaltered	56		TCGA-BF-A1Q0	Unaltered	18		TCGA-DY-A1H8	Unaltered	4		TCGA-TM-A84B	Unaltered	0
TCGA-A3-3365	Unaltered	165		TCGA-KQ-A41N	Unaltered	55		TCGA-XU-A933	Unaltered	18		TCGA-EI-6884	Unaltered	4		TCGA-TM-A84C	Unaltered	0
TCGA-Y8-A8RY	Unaltered	165		TCGA-FG-7636	Unaltered	55		TCGA-BJ-A2NA	Unaltered	18		TCGA-A6-5659	Unaltered	4		TCGA-TM-A84J	Unaltered	0
TCGA-G3-A7M9	Altered	165		TCGA-S9-A6WD	Unaltered	55		TCGA-EM-A2CL	Unaltered	18		TCGA-AA-3655	Unaltered	4		TCGA-TM-A84M	Unaltered	0
TCGA-2L-AAQJ	Unaltered	165		TCGA-VW-A7QS	Unaltered	55		TCGA-B5-A1MZ	Unaltered	18		TCGA-AA-3842	Unaltered	4		TCGA-TM-A84O	Unaltered	0
TCGA-55-8511	Unaltered	164		TCGA-A8-A0A1	Unaltered	55		TCGA-D1-A0ZN	Altered	18		TCGA-AA-3854	Unaltered	4		TCGA-TQ-A7RG	Unaltered	0
TCGA-98-8021	Unaltered	164		TCGA-AR-A24H	Unaltered	55		TCGA-E7-A5KF	Unaltered	17		TCGA-AY-5543	Unaltered	4		TCGA-TQ-A7RW	Unaltered	0
TCGA-NC-A5HH	Unaltered	164		TCGA-C8-A274	Altered	55		TCGA-DU-A76K	Unaltered	17		TCGA-AZ-5403	Unaltered	4		TCGA-VM-A8CF	Unaltered	0
TCGA-QH-A65X	Unaltered	163		TCGA-LL-A50Y	Unaltered	55		TCGA-HT-8108	Unaltered	17		TCGA-AZ-6603	Unaltered	4		TCGA-VM-A8CH	Unaltered	0
TCGA-FF-8042	Unaltered	163		TCGA-EK-A2R9	Unaltered	55		TCGA-A2-A0CX	Unaltered	17		TCGA-CK-5914	Unaltered	4		TCGA-WY-A859	Unaltered	0
TCGA-CN-A497	Unaltered	163		TCGA-CI-6623	Unaltered	55		TCGA-A2-A0YF	Unaltered	17		TCGA-CM-5868	Unaltered	4		TCGA-WY-A85D	Unaltered	0
TCGA-CC-A7IL	Unaltered	163		TCGA-AA-3982	Unaltered	55		TCGA-BH-A1FN	Unaltered	17		TCGA-CM-6166	Unaltered	4		TCGA-R8-A6YH	Unaltered	0
TCGA-ZG-A9KY	Unaltered	163		TCGA-AD-6965	Unaltered	55		TCGA-D8-A1JP	Unaltered	17		TCGA-CM-6170	Unaltered	4		TCGA-3C-AAAU	Unaltered	0
TCGA-BH-A0B4	Unaltered	162		TCGA-32-4213	Unaltered	55		TCGA-GM-A2DD	Unaltered	17		TCGA-DM-A282	Unaltered	4		TCGA-3C-AALK	Unaltered	0
TCGA-FV-A2QQ	Unaltered	162		TCGA-CN-4729	Unaltered	55		TCGA-IR-A3LF	Altered	17		TCGA-F4-6854	Unaltered	4		TCGA-5T-A9QA	Unaltered	0
TCGA-62-8398	Unaltered	162		TCGA-CN-6996	Unaltered	55		TCGA-VS-A9UQ	Unaltered	17		TCGA-G4-6297	Unaltered	4		TCGA-A1-A0SE	Unaltered	0
TCGA-86-8279	Unaltered	162		TCGA-DD-AAVU	Unaltered	55		TCGA-W5-AA2O	Unaltered	17		TCGA-FA-A7Q1	Unaltered	4		TCGA-A1-A0SG	Unaltered	0
TCGA-KK-A5A1	Unaltered	162		TCGA-55-8616	Unaltered	55		TCGA-W5-AA38	Unaltered	17		TCGA-GR-A4D9	Unaltered	4		TCGA-A1-A0SI	Unaltered	0
TCGA-B6-A0I8	Unaltered	161		TCGA-78-8660	Unaltered	55		TCGA-DT-5265	Unaltered	17		TCGA-GS-A9U3	Unaltered	4		TCGA-A2-A04Q	Unaltered	0
TCGA-CA-5797	Unaltered	161		TCGA-86-8056	Unaltered	55		TCGA-A6-4107	Unaltered	17		TCGA-06-2557	Unaltered	4		TCGA-A2-A04X	Unaltered	0
TCGA-CK-4950	Unaltered	161		TCGA-18-3415	Unaltered	55		TCGA-CR-6474	Unaltered	17		TCGA-19-2620	Unaltered	4		TCGA-A2-A0CK	Unaltered	0
TCGA-F7-7848	Unaltered	161		TCGA-33-AASD	Unaltered	55		TCGA-CR-6477	Unaltered	17		TCGA-32-2615	Unaltered	4		TCGA-A2-A0CP	Unaltered	0
TCGA-99-8025	Unaltered	161		TCGA-34-5239	Unaltered	55		TCGA-CR-7365	Unaltered	17		TCGA-41-3915	Unaltered	4		TCGA-A2-A0CR	Unaltered	0
TCGA-56-8305	Unaltered	161		TCGA-43-7656	Unaltered	55		TCGA-CV-7104	Unaltered	17		TCGA-14-0787	Unaltered	4		TCGA-A2-A0CT	Unaltered	0
TCGA-EB-A6QY	Unaltered	161		TCGA-70-6723	Unaltered	55		TCGA-CV-7236	Unaltered	17		TCGA-BA-5151	Unaltered	4		TCGA-A2-A0ES	Unaltered	0
TCGA-A2-A0D1	Unaltered	160		TCGA-77-8128	Unaltered	55		TCGA-D6-6826	Unaltered	17		TCGA-BA-A8YP	Unaltered	4		TCGA-A2-A0EV	Unaltered	0
TCGA-A8-A06R	Unaltered	160		TCGA-77-A5G8	Unaltered	55		TCGA-HD-7832	Unaltered	17		TCGA-CN-A49A	Unaltered	4		TCGA-A2-A0T1	Unaltered	0
TCGA-A8-A09V	Altered	160		TCGA-IB-A6UF	Unaltered	55		TCGA-P3-A6SX	Unaltered	17		TCGA-CN-A6V1	Unaltered	4		TCGA-A2-A0T3	Unaltered	0
TCGA-CV-7254	Unaltered	160		TCGA-EJ-5519	Unaltered	55		TCGA-A3-3326	Unaltered	17		TCGA-CQ-6223	Unaltered	4		TCGA-A2-A0T6	Unaltered	0
TCGA-AK-3444	Unaltered	160		TCGA-ER-A19K	Unaltered	55		TCGA-B8-4620	Altered	17		TCGA-CQ-7065	Unaltered	4		TCGA-A2-A1G1	Unaltered	0
TCGA-L9-A5IP	Unaltered	160		TCGA-EL-A3GR	Unaltered	55		TCGA-BP-4989	Unaltered	17		TCGA-CQ-A4CE	Unaltered	4		TCGA-A2-A25E	Unaltered	0
TCGA-39-5031	Unaltered	160		TCGA-KS-A41I	Unaltered	55		TCGA-BP-4993	Unaltered	17		TCGA-CQ-A4CG	Unaltered	4		TCGA-A2-A3Y0	Unaltered	0
TCGA-CA-6717	Altered	159		TCGA-AX-A2HK	Unaltered	55		TCGA-CJ-4904	Unaltered	17		TCGA-CR-5249	Unaltered	4		TCGA-A7-A0CG	Unaltered	0
TCGA-2Z-A9JT	Unaltered	159		TCGA-E1-A7YJ	Unaltered	54		TCGA-B3-3925	Unaltered	17		TCGA-CR-7401	Unaltered	4		TCGA-A8-A06Y	Unaltered	0
TCGA-HP-A5N0	Unaltered	159		TCGA-A2-A1FV	Unaltered	54		TCGA-BQ-5891	Altered	17		TCGA-CV-6934	Unaltered	4		TCGA-A8-A076	Unaltered	0
TCGA-52-7622	Unaltered	159		TCGA-A7-A0DA	Unaltered	54		TCGA-G7-6790	Unaltered	17		TCGA-CV-6951	Unaltered	4		TCGA-A8-A07I	Unaltered	0
TCGA-CJ-4638	Unaltered	158		TCGA-AC-A2QH	Unaltered	54		TCGA-2Y-A9GT	Unaltered	17		TCGA-CV-7180	Unaltered	4		TCGA-A8-A07Z	Unaltered	0
TCGA-18-3407	Unaltered	158		TCGA-D8-A1Y0	Unaltered	54		TCGA-BC-A10W	Unaltered	17		TCGA-CV-7415	Unaltered	4		TCGA-A8-A08J	Unaltered	0
TCGA-BF-A5ES	Altered	158		TCGA-E9-A22E	Unaltered	54		TCGA-CC-A7IK	Unaltered	17		TCGA-CV-7423	Unaltered	4		TCGA-A8-A08O	Unaltered	0
TCGA-AX-A06F	Unaltered	158		TCGA-LL-A5YL	Unaltered	54		TCGA-DD-A4NL	Unaltered	17		TCGA-CV-A45V	Unaltered	4		TCGA-A8-A08P	Unaltered	0
TCGA-OR-A5J5	Unaltered	157		TCGA-A6-A566	Unaltered	54		TCGA-55-7573	Unaltered	17		TCGA-D6-6824	Unaltered	4		TCGA-A8-A08T	Unaltered	0
TCGA-AO-A128	Unaltered	157		TCGA-CM-4744	Unaltered	54		TCGA-MP-A4T8	Unaltered	17		TCGA-D6-A6EM	Unaltered	4		TCGA-A8-A091	Unaltered	0
TCGA-B6-A1KI	Unaltered	157		TCGA-D5-5538	Unaltered	54		TCGA-18-3416	Unaltered	17		TCGA-D6-A6EO	Unaltered	4		TCGA-A8-A095	Altered	0
TCGA-AY-6386	Unaltered	157		TCGA-06-0878	Unaltered	54		TCGA-21-1079	Unaltered	17		TCGA-D6-A6ES	Unaltered	4		TCGA-A8-A09D	Unaltered	0
TCGA-B0-5706	Unaltered	157		TCGA-CV-A45U	Unaltered	54		TCGA-22-5483	Unaltered	17		TCGA-F7-8489	Unaltered	4		TCGA-A8-A09X	Unaltered	0
TCGA-BQ-5883	Unaltered	157		TCGA-DD-A1EJ	Unaltered	54		TCGA-33-A5GW	Unaltered	17		TCGA-IQ-A61O	Unaltered	4		TCGA-A8-A0A4	Unaltered	0
TCGA-DD-AADL	Unaltered	157		TCGA-KR-A7K2	Unaltered	54		TCGA-39-5037	Unaltered	17		TCGA-MT-A67D	Unaltered	4		TCGA-A8-A0A7	Unaltered	0
TCGA-78-7536	Unaltered	157		TCGA-ZP-A9D0	Unaltered	54		TCGA-43-6647	Unaltered	17		TCGA-MZ-A6I9	Unaltered	4		TCGA-A8-A0AB	Unaltered	0
TCGA-44-6779	Unaltered	156		TCGA-22-4609	Unaltered	54		TCGA-43-6773	Unaltered	17		TCGA-KL-8339	Unaltered	4		TCGA-AC-A2FO	Unaltered	0
TCGA-55-A493	Unaltered	156		TCGA-56-7582	Unaltered	54		TCGA-77-8145	Unaltered	17		TCGA-KL-8341	Altered	4		TCGA-AC-A3HN	Unaltered	0
TCGA-AC-A8OP	Unaltered	155		TCGA-56-A49D	Unaltered	54		TCGA-NC-A5HT	Unaltered	17		TCGA-B0-5121	Altered	4		TCGA-AC-A3OD	Unaltered	0
TCGA-D8-A1XA	Unaltered	155		TCGA-63-A5MU	Unaltered	54		TCGA-MQ-A4LP	Unaltered	17		TCGA-B0-5399	Altered	4		TCGA-AC-A3QP	Unaltered	0
TCGA-D8-A1XW	Unaltered	155		TCGA-66-2792	Unaltered	54		TCGA-HZ-8315	Unaltered	17		TCGA-B4-5843	Unaltered	4		TCGA-AC-A3YI	Unaltered	0
TCGA-CJ-4920	Altered	155		TCGA-UT-A88G	Unaltered	54		TCGA-EJ-7784	Unaltered	17		TCGA-BP-4975	Unaltered	4		TCGA-AC-A62X	Unaltered	0
TCGA-60-2721	Unaltered	155		TCGA-AJ-A3EL	Altered	54		TCGA-FC-A4JI	Unaltered	17		TCGA-CJ-4916	Unaltered	4		TCGA-AN-A04A	Unaltered	0
TCGA-66-2727	Unaltered	155		TCGA-OR-A5K2	Unaltered	53		TCGA-KK-A8I9	Unaltered	17		TCGA-CZ-5984	Unaltered	4		TCGA-AN-A0FD	Unaltered	0
TCGA-K4-AAQO	Unaltered	154		TCGA-HT-7472	Unaltered	53		TCGA-DX-AB30	Unaltered	17		TCGA-A4-8098	Altered	4		TCGA-AN-A0FF	Unaltered	0
TCGA-06-5416	Altered	154		TCGA-BH-A0B1	Unaltered	53		TCGA-X6-A8C3	Unaltered	17		TCGA-AL-3472	Unaltered	4		TCGA-AN-A0G0	Unaltered	0
TCGA-IA-A83T	Unaltered	154		TCGA-BH-A0BT	Unaltered	53		TCGA-4V-A9QI	Unaltered	17		TCGA-HE-7129	Unaltered	4		TCGA-AO-A125	Unaltered	0
TCGA-G3-A5SJ	Unaltered	154		TCGA-C5-A1BE	Unaltered	53		TCGA-EM-A2P3	Unaltered	17		TCGA-BC-A3KF	Unaltered	4		TCGA-AO-A12H	Unaltered	0
TCGA-78-7539	Unaltered	154		TCGA-EK-A2GZ	Unaltered	53		TCGA-NA-A4QY	Unaltered	17		TCGA-DD-A1EF	Altered	4		TCGA-AR-A1AS	Unaltered	0
TCGA-77-A5GH	Unaltered	154		TCGA-AA-3530	Unaltered	53		TCGA-AJ-A3BF	Unaltered	17		TCGA-DD-A3A5	Unaltered	4		TCGA-AR-A24M	Unaltered	0
TCGA-YC-A8S6	Unaltered	153		TCGA-BA-4076	Unaltered	53		TCGA-EY-A2OO	Unaltered	17		TCGA-DD-A4NP	Unaltered	4		TCGA-AR-A24W	Unaltered	0
TCGA-UF-A71D	Unaltered	153		TCGA-CN-6021	Unaltered	53		TCGA-FI-A3PV	Unaltered	17		TCGA-DD-A4NS	Unaltered	4		TCGA-AR-A254	Unaltered	0
TCGA-05-4249	Unaltered	153		TCGA-CV-6938	Unaltered	53		TCGA-G2-A2EJ	Unaltered	16		TCGA-DD-AADA	Unaltered	4		TCGA-AR-A2LM	Unaltered	0
TCGA-44-2659	Unaltered	153		TCGA-P3-A5Q6	Unaltered	53		TCGA-XF-A9SU	Unaltered	16		TCGA-MR-A8JO	Unaltered	4		TCGA-B6-A0I5	Unaltered	0
TCGA-86-8669	Unaltered	153		TCGA-AK-3458	Unaltered	53		TCGA-DB-A4XD	Unaltered	16		TCGA-RC-A7SH	Unaltered	4		TCGA-B6-A0RH	Unaltered	0
TCGA-37-3792	Unaltered	153		TCGA-B8-4154	Unaltered	53		TCGA-DB-A64O	Unaltered	16		TCGA-05-4384	Unaltered	4		TCGA-B6-A0RN	Unaltered	0
TCGA-NC-A5HJ	Unaltered	153		TCGA-EU-5907	Unaltered	53		TCGA-DU-A5TY	Unaltered	16		TCGA-05-4403	Unaltered	4		TCGA-B6-A0WW	Unaltered	0
TCGA-IB-7651	Altered	153		TCGA-2Y-A9GU	Unaltered	53		TCGA-E1-A7YS	Unaltered	16		TCGA-05-5429	Unaltered	4		TCGA-B6-A0X0	Unaltered	0
TCGA-CW-5580	Altered	152		TCGA-BW-A5NQ	Unaltered	53		TCGA-TM-A84G	Unaltered	16		TCGA-50-5051	Unaltered	4		TCGA-BH-A0B5	Unaltered	0
TCGA-WX-AA44	Unaltered	152		TCGA-CC-A3MA	Unaltered	53		TCGA-A8-A079	Unaltered	16		TCGA-50-5068	Unaltered	4		TCGA-BH-A0BG	Unaltered	0
TCGA-53-7624	Altered	152		TCGA-DD-A4NA	Unaltered	53		TCGA-A8-A081	Unaltered	16		TCGA-50-5939	Unaltered	4		TCGA-BH-A0BJ	Unaltered	0
TCGA-73-4668	Unaltered	152		TCGA-78-7166	Unaltered	53		TCGA-A8-A09I	Unaltered	16		TCGA-50-8460	Unaltered	4		TCGA-BH-A0BO	Unaltered	0
TCGA-22-1016	Unaltered	152		TCGA-NJ-A4YP	Unaltered	53		TCGA-AR-A5QN	Unaltered	16		TCGA-55-6975	Unaltered	4		TCGA-BH-A0EI	Unaltered	0
TCGA-77-7141	Altered	152		TCGA-33-AASI	Unaltered	53		TCGA-BH-A0BM	Unaltered	16		TCGA-55-6978	Unaltered	4		TCGA-BH-A0GZ	Altered	0
TCGA-HW-8322	Unaltered	151		TCGA-66-2754	Unaltered	53		TCGA-BH-A0E9	Unaltered	16		TCGA-55-6986	Altered	4		TCGA-BH-A0H7	Unaltered	0
TCGA-AO-A03T	Altered	151		TCGA-66-2787	Unaltered	53		TCGA-BH-AB28	Unaltered	16		TCGA-55-A4DF	Altered	4		TCGA-BH-A0HN	Unaltered	0
TCGA-CV-7247	Unaltered	151		TCGA-QT-A5XO	Unaltered	53		TCGA-C8-A1HM	Unaltered	16		TCGA-64-5774	Unaltered	4		TCGA-BH-A0HU	Unaltered	0
TCGA-BQ-5878	Unaltered	151		TCGA-EJ-7327	Unaltered	53		TCGA-D8-A73U	Unaltered	16		TCGA-69-7760	Altered	4		TCGA-BH-A0HW	Unaltered	0
TCGA-97-7937	Unaltered	151		TCGA-DX-A8BU	Unaltered	53		TCGA-VS-A9V0	Unaltered	16		TCGA-78-7540	Unaltered	4		TCGA-BH-A0HX	Unaltered	0
TCGA-QR-A70U	Unaltered	151		TCGA-AX-A2HH	Unaltered	53		TCGA-F5-6811	Unaltered	16		TCGA-33-4589	Unaltered	4		TCGA-BH-A0W5	Unaltered	0
TCGA-XF-A9T3	Unaltered	150		TCGA-BG-A0W1	Unaltered	53		TCGA-BA-A6D8	Unaltered	16		TCGA-56-7822	Unaltered	4		TCGA-BH-A18L	Unaltered	0
TCGA-HE-A5NH	Unaltered	150		TCGA-EO-A3L0	Unaltered	53		TCGA-CN-5356	Unaltered	16		TCGA-66-2788	Unaltered	4		TCGA-BH-A1EU	Unaltered	0
TCGA-NJ-A55A	Unaltered	150		TCGA-FD-A62N	Unaltered	52		TCGA-CQ-7069	Unaltered	16		TCGA-77-A5G7	Unaltered	4		TCGA-BH-A1EY	Unaltered	0
TCGA-G2-A3IE	Unaltered	149		TCGA-XF-AAMH	Unaltered	52		TCGA-CV-7097	Unaltered	16		TCGA-77-A5GB	Unaltered	4		TCGA-BH-A1F2	Unaltered	0
TCGA-BH-A5J0	Unaltered	149		TCGA-XF-AAML	Altered	52		TCGA-CV-7235	Unaltered	16		TCGA-SC-A6LN	Unaltered	4		TCGA-BH-A1FD	Unaltered	0
TCGA-NH-A6GB	Unaltered	149		TCGA-XF-AAN0	Unaltered	52		TCGA-CX-7219	Unaltered	16		TCGA-SC-A6LR	Unaltered	4		TCGA-BH-A1FG	Unaltered	0
TCGA-MM-A564	Unaltered	149		TCGA-B6-A0RG	Unaltered	52		TCGA-IQ-A61G	Unaltered	16		TCGA-2J-AAB6	Unaltered	4		TCGA-BH-A1FJ	Unaltered	0
TCGA-B1-A47N	Unaltered	149		TCGA-BH-A0BZ	Unaltered	52		TCGA-KN-8428	Unaltered	16		TCGA-2J-AABH	Unaltered	4		TCGA-BH-A201	Unaltered	0
TCGA-62-A472	Unaltered	149		TCGA-D8-A1JE	Unaltered	52		TCGA-A3-A8OV	Unaltered	16		TCGA-2L-AAQA	Unaltered	4		TCGA-C8-A12V	Unaltered	0
TCGA-77-8133	Unaltered	149		TCGA-A6-2671	Unaltered	52		TCGA-B0-5710	Unaltered	16		TCGA-H6-8124	Unaltered	4		TCGA-C8-A12X	Unaltered	0
TCGA-G2-A3VY	Altered	148		TCGA-AA-3851	Altered	52		TCGA-BD-A2L6	Unaltered	16		TCGA-HV-A5A6	Unaltered	4		TCGA-C8-A12Z	Unaltered	0
TCGA-BA-6869	Unaltered	148		TCGA-DM-A288	Unaltered	52		TCGA-BW-A5NO	Unaltered	16		TCGA-IB-7886	Unaltered	4		TCGA-C8-A137	Unaltered	0
TCGA-AL-7173	Unaltered	148		TCGA-G4-6315	Unaltered	52		TCGA-DD-AACY	Unaltered	16		TCGA-SA-A6C2	Unaltered	4		TCGA-C8-A1HI	Unaltered	0
TCGA-GL-6846	Unaltered	148		TCGA-06-5417	Unaltered	52		TCGA-G3-AAV7	Unaltered	16		TCGA-CH-5754	Unaltered	4		TCGA-C8-A273	Unaltered	0
TCGA-HE-A5NI	Unaltered	148		TCGA-CQ-5324	Altered	52		TCGA-05-4420	Unaltered	16		TCGA-EJ-5507	Unaltered	4		TCGA-C8-A3M7	Unaltered	0
TCGA-N5-A59E	Unaltered	148		TCGA-CV-7177	Unaltered	52		TCGA-44-3396	Unaltered	16		TCGA-FC-7708	Unaltered	4		TCGA-C8-A8HP	Unaltered	0
TCGA-5P-A9JU	Altered	147		TCGA-BP-4977	Unaltered	52		TCGA-55-6712	Unaltered	16		TCGA-G9-6366	Unaltered	4		TCGA-D8-A13Z	Unaltered	0
TCGA-5P-A9K0	Unaltered	147		TCGA-PJ-A5Z8	Unaltered	52		TCGA-46-6026	Altered	16		TCGA-G9-6494	Unaltered	4		TCGA-D8-A1JT	Unaltered	0
TCGA-B9-A5W8	Unaltered	147		TCGA-CC-A9FU	Altered	52		TCGA-CH-5761	Unaltered	16		TCGA-G9-7525	Unaltered	4		TCGA-D8-A1XM	Unaltered	0
TCGA-39-5040	Unaltered	147		TCGA-DD-AACD	Unaltered	52		TCGA-ZG-A9M4	Unaltered	16		TCGA-HI-7168	Unaltered	4		TCGA-D8-A1XR	Unaltered	0
TCGA-85-6561	Unaltered	147		TCGA-55-1592	Unaltered	52		TCGA-MB-A8JK	Unaltered	16		TCGA-J9-A52D	Unaltered	4		TCGA-D8-A1XT	Unaltered	0
TCGA-FG-A713	Unaltered	146		TCGA-78-7159	Unaltered	52		TCGA-EL-A4K2	Unaltered	16		TCGA-KK-A8II	Unaltered	4		TCGA-D8-A1XV	Unaltered	0
TCGA-HD-A633	Unaltered	146		TCGA-MP-A4TK	Unaltered	52		TCGA-E7-A678	Unaltered	15		TCGA-KK-A8IL	Unaltered	4		TCGA-D8-A27W	Unaltered	0
TCGA-78-7220	Unaltered	146		TCGA-34-5236	Unaltered	52		TCGA-FD-A62P	Unaltered	15		TCGA-TP-A8TV	Unaltered	4		TCGA-E2-A10C	Unaltered	0
TCGA-HQ-A5NE	Unaltered	145		TCGA-85-8351	Unaltered	52		TCGA-FJ-A3ZF	Unaltered	15		TCGA-V1-A9OT	Unaltered	4		TCGA-E2-A10F	Unaltered	0
TCGA-WY-A85C	Unaltered	145		TCGA-LK-A4NY	Unaltered	52		TCGA-GV-A3JV	Unaltered	15		TCGA-YL-A8SA	Unaltered	4		TCGA-E2-A14N	Unaltered	0
TCGA-AC-A3W5	Unaltered	145		TCGA-HZ-A77P	Unaltered	52		TCGA-XF-A9T6	Unaltered	15		TCGA-ZG-A9LS	Unaltered	4		TCGA-E2-A14O	Unaltered	0
TCGA-EW-A1P7	Unaltered	145		TCGA-CH-5750	Unaltered	52		TCGA-ZF-A9R5	Unaltered	15		TCGA-ZG-A9LU	Unaltered	4		TCGA-E2-A150	Unaltered	0
TCGA-BA-6873	Unaltered	145		TCGA-DX-A6YV	Unaltered	52		TCGA-FG-A87N	Unaltered	15		TCGA-3B-A9HU	Unaltered	4		TCGA-E2-A152	Unaltered	0
TCGA-99-8032	Unaltered	145		TCGA-DX-A6Z2	Unaltered	52		TCGA-HT-A5R5	Unaltered	15		TCGA-DX-A3U7	Unaltered	4		TCGA-E2-A15T	Unaltered	0
TCGA-96-7544	Unaltered	145		TCGA-X3-A8G4	Unaltered	52		TCGA-HT-A5R9	Unaltered	15		TCGA-DX-A6BF	Unaltered	4		TCGA-E2-A1B0	Unaltered	0
TCGA-A2-A1G0	Unaltered	144		TCGA-2G-AALT	Unaltered	52		TCGA-AO-A12F	Unaltered	15		TCGA-DX-A8BJ	Unaltered	4		TCGA-E2-A1B1	Unaltered	0
TCGA-A7-A6VX	Unaltered	144		TCGA-B5-A0JN	Unaltered	52		TCGA-AR-A1AY	Unaltered	15		TCGA-KF-A41W	Unaltered	4		TCGA-E2-A1B4	Unaltered	0
TCGA-CN-A63T	Unaltered	144		TCGA-EO-A3AV	Altered	52		TCGA-B6-A0X4	Unaltered	15		TCGA-PC-A5DN	Unaltered	4		TCGA-E2-A1IU	Unaltered	0
TCGA-B2-A4SR	Unaltered	144		TCGA-VD-AA8P	Unaltered	52		TCGA-BH-A18H	Unaltered	15		TCGA-WK-A8XY	Unaltered	4		TCGA-E2-A1L9	Unaltered	0
TCGA-P4-A5EB	Unaltered	144		TCGA-CF-A47S	Unaltered	51		TCGA-BH-A203	Unaltered	15		TCGA-WK-A8XZ	Unaltered	4		TCGA-E2-A1LB	Unaltered	0
TCGA-HT-7877	Unaltered	143		TCGA-GV-A40E	Unaltered	51		TCGA-D8-A147	Unaltered	15		TCGA-BF-A5ER	Unaltered	4		TCGA-E2-A1LG	Unaltered	0
TCGA-CV-6003	Unaltered	143		TCGA-S9-A6WE	Unaltered	51		TCGA-D8-A27I	Unaltered	15		TCGA-EB-A41B	Unaltered	4		TCGA-E9-A228	Unaltered	0
TCGA-68-7756	Unaltered	143		TCGA-TM-A84T	Unaltered	51		TCGA-C5-A8YR	Unaltered	15		TCGA-GN-A263	Unaltered	4		TCGA-E9-A22A	Unaltered	0
TCGA-DI-A2QU	Unaltered	143		TCGA-AQ-A7U7	Unaltered	51		TCGA-Q1-A73S	Unaltered	15		TCGA-2G-AAGT	Unaltered	4		TCGA-E9-A22B	Unaltered	0
TCGA-HW-7490	Unaltered	142		TCGA-D8-A1JN	Unaltered	51		TCGA-4G-AAZT	Unaltered	15		TCGA-WZ-A8D5	Unaltered	4		TCGA-E9-A5UO	Unaltered	0
TCGA-IR-A3LH	Unaltered	142		TCGA-AF-6655	Unaltered	51		TCGA-CL-5917	Unaltered	15		TCGA-XE-AAO4	Unaltered	4		TCGA-EW-A1J1	Unaltered	0
TCGA-A4-A772	Unaltered	142		TCGA-A6-6651	Unaltered	51		TCGA-FA-8693	Altered	15		TCGA-YU-A94D	Unaltered	4		TCGA-EW-A1J6	Unaltered	0
TCGA-E7-A519	Unaltered	141		TCGA-DM-A1D9	Unaltered	51		TCGA-FA-A4BB	Unaltered	15		TCGA-4X-A9FD	Unaltered	4		TCGA-EW-A1P5	Unaltered	0
TCGA-DB-5276	Unaltered	141		TCGA-BB-A5HY	Unaltered	51		TCGA-16-1045	Unaltered	15		TCGA-5U-AB0F	Unaltered	4		TCGA-EW-A2FW	Unaltered	0
TCGA-06-2562	Unaltered	141		TCGA-CQ-A4CH	Unaltered	51		TCGA-28-2513	Unaltered	15		TCGA-XU-A936	Unaltered	4		TCGA-EW-A6SC	Unaltered	0
TCGA-14-0781	Unaltered	141		TCGA-CV-5978	Unaltered	51		TCGA-BB-4224	Unaltered	15		TCGA-ZC-AAAF	Unaltered	4		TCGA-GM-A2D9	Unaltered	0
TCGA-CR-7370	Unaltered	141		TCGA-DQ-5630	Unaltered	51		TCGA-CN-6018	Unaltered	15		TCGA-DJ-A13S	Unaltered	4		TCGA-GM-A2DA	Unaltered	0
TCGA-HD-A634	Unaltered	141		TCGA-HE-A5NF	Unaltered	51		TCGA-CR-7404	Unaltered	15		TCGA-DJ-A1QH	Unaltered	4		TCGA-GM-A2DI	Unaltered	0
TCGA-53-7813	Unaltered	141		TCGA-05-4430	Unaltered	51		TCGA-CV-6956	Unaltered	15		TCGA-E3-A3DZ	Unaltered	4		TCGA-GM-A2DK	Unaltered	0
TCGA-55-6642	Unaltered	141		TCGA-55-6987	Unaltered	51		TCGA-CV-7099	Unaltered	15		TCGA-EL-A4JW	Unaltered	4		TCGA-GM-A3NW	Unaltered	0
TCGA-55-8302	Unaltered	141		TCGA-78-7152	Unaltered	51		TCGA-H7-A6C5	Unaltered	15		TCGA-EM-A2CO	Unaltered	4		TCGA-GM-A5PV	Unaltered	0
TCGA-85-8287	Unaltered	141		TCGA-86-8054	Unaltered	51		TCGA-HD-7229	Unaltered	15		TCGA-ET-A3BN	Unaltered	4		TCGA-HN-A2OB	Unaltered	0
TCGA-NC-A5HR	Unaltered	141		TCGA-95-7947	Unaltered	51		TCGA-IQ-A6SG	Unaltered	15		TCGA-MK-A4N6	Unaltered	4		TCGA-JL-A3YX	Unaltered	0
TCGA-AP-A059	Altered	141		TCGA-85-8070	Unaltered	51		TCGA-QK-A6II	Unaltered	15		TCGA-NA-A4QX	Unaltered	4		TCGA-LL-A7T0	Unaltered	0
TCGA-EO-A22U	Altered	141		TCGA-85-A50Z	Unaltered	51		TCGA-TN-A7HL	Unaltered	15		TCGA-AP-A0LV	Unaltered	4		TCGA-OL-A5D6	Unaltered	0
TCGA-DZ-6132	Unaltered	140		TCGA-FB-AAQ3	Unaltered	51		TCGA-B0-4821	Altered	15		TCGA-B5-A11I	Unaltered	4		TCGA-OL-A5RX	Unaltered	0
TCGA-DD-A4NN	Unaltered	140		TCGA-EJ-7115	Unaltered	51		TCGA-BP-4961	Unaltered	15		TCGA-BG-A0MT	Unaltered	4		TCGA-OL-A66I	Unaltered	0
TCGA-49-4505	Unaltered	140		TCGA-KC-A4BR	Altered	51		TCGA-BP-4967	Unaltered	15		TCGA-D1-A1O0	Unaltered	4		TCGA-PE-A5DE	Unaltered	0
TCGA-55-7574	Unaltered	140		TCGA-ZG-A8QY	Unaltered	51		TCGA-BP-5191	Altered	15		TCGA-PG-A914	Unaltered	4		TCGA-S3-AA12	Unaltered	0
TCGA-NC-A5HF	Unaltered	140		TCGA-FY-A40L	Unaltered	51		TCGA-BP-5202	Unaltered	15		TCGA-OR-A5KT	Unaltered	3		TCGA-UL-AAZ6	Unaltered	0
TCGA-B5-A11G	Unaltered	140		TCGA-N5-A4RV	Unaltered	51		TCGA-CJ-5675	Unaltered	15		TCGA-PK-A5H8	Unaltered	3		TCGA-WT-AB41	Unaltered	0
TCGA-DD-AADK	Altered	139		TCGA-B5-A11V	Unaltered	51		TCGA-CZ-5470	Altered	15		TCGA-2F-A9KR	Unaltered	3		TCGA-XX-A899	Unaltered	0
TCGA-34-A5IX	Unaltered	139		TCGA-BK-A6W3	Altered	51		TCGA-B3-3926	Unaltered	15		TCGA-CF-A3MI	Unaltered	3		TCGA-Z7-A8R5	Unaltered	0
TCGA-60-2713	Unaltered	139		TCGA-D1-A1O8	Unaltered	51		TCGA-B9-4115	Unaltered	15		TCGA-CF-A8HY	Unaltered	3		TCGA-4J-AA1J	Unaltered	0
TCGA-90-7766	Unaltered	139		TCGA-BT-A3PK	Unaltered	50		TCGA-5R-AAAM	Unaltered	15		TCGA-DK-A3IK	Unaltered	3		TCGA-C5-A1BI	Unaltered	0
TCGA-BH-A0AW	Unaltered	138		TCGA-XF-A9SZ	Unaltered	50		TCGA-DD-A73D	Unaltered	15		TCGA-DK-A3IS	Unaltered	3		TCGA-C5-A1M5	Unaltered	0
TCGA-86-8674	Unaltered	138		TCGA-AO-A124	Unaltered	50		TCGA-DD-AACP	Unaltered	15		TCGA-E7-A4XJ	Unaltered	3		TCGA-C5-A1MF	Unaltered	0
TCGA-56-7223	Altered	138		TCGA-B6-A0RQ	Unaltered	50		TCGA-DD-AACZ	Unaltered	15		TCGA-E7-A7DU	Unaltered	3		TCGA-C5-A1MH	Unaltered	0
TCGA-56-8307	Unaltered	138		TCGA-BH-A1EN	Unaltered	50		TCGA-O8-A75V	Unaltered	15		TCGA-FD-A5C1	Unaltered	3		TCGA-C5-A1ML	Unaltered	0
TCGA-60-2725	Unaltered	138		TCGA-E9-A1ND	Unaltered	50		TCGA-XR-A8TF	Unaltered	15		TCGA-GD-A3OQ	Unaltered	3		TCGA-C5-A3HF	Unaltered	0
TCGA-3U-A98H	Altered	138		TCGA-E9-A1RA	Unaltered	50		TCGA-78-7535	Unaltered	15		TCGA-GU-A764	Unaltered	3		TCGA-C5-A7CJ	Unaltered	0
TCGA-FD-A62S	Unaltered	137		TCGA-E9-A247	Unaltered	50		TCGA-95-8494	Unaltered	15		TCGA-HQ-A2OE	Unaltered	3		TCGA-C5-A7X5	Unaltered	0
TCGA-QH-A870	Unaltered	137		TCGA-LL-A8F5	Unaltered	50		TCGA-21-1075	Unaltered	15		TCGA-MV-A51V	Unaltered	3		TCGA-C5-A8XI	Unaltered	0
TCGA-A7-A5ZV	Unaltered	137		TCGA-BI-A20A	Unaltered	50		TCGA-43-7658	Unaltered	15		TCGA-XF-AAME	Unaltered	3		TCGA-C5-A8ZZ	Unaltered	0
TCGA-VS-A8Q9	Unaltered	137		TCGA-C5-A8XJ	Unaltered	50		TCGA-43-A56U	Unaltered	15		TCGA-ZF-AA4X	Altered	3		TCGA-DG-A2KJ	Unaltered	0
TCGA-CV-A45Z	Unaltered	137		TCGA-Q1-A5R3	Unaltered	50		TCGA-66-2777	Unaltered	15		TCGA-ZF-AA52	Unaltered	3		TCGA-DS-A5RQ	Unaltered	0
TCGA-B8-5551	Unaltered	137		TCGA-CQ-6218	Unaltered	50		TCGA-66-2800	Unaltered	15		TCGA-DB-A4X9	Unaltered	3		TCGA-DS-A7WF	Unaltered	0
TCGA-44-6777	Unaltered	137		TCGA-B8-4143	Unaltered	50		TCGA-96-7545	Unaltered	15		TCGA-DB-A4XE	Unaltered	3		TCGA-DS-A7WH	Unaltered	0
TCGA-A5-A2K5	Altered	137		TCGA-HE-7130	Unaltered	50		TCGA-2L-AAQL	Unaltered	15		TCGA-DB-A64U	Unaltered	3		TCGA-DS-A7WI	Unaltered	0
TCGA-GL-A59R	Unaltered	136		TCGA-UZ-A9PN	Unaltered	50		TCGA-HV-A7OL	Unaltered	15		TCGA-DU-6402	Unaltered	3		TCGA-EA-A3HR	Unaltered	0
TCGA-P4-A5E6	Unaltered	136		TCGA-83-5908	Unaltered	50		TCGA-KK-A7AY	Unaltered	15		TCGA-DU-7008	Unaltered	3		TCGA-EA-A3HT	Unaltered	0
TCGA-50-5933	Unaltered	136		TCGA-56-A4BY	Unaltered	50		TCGA-JV-A5VF	Unaltered	15		TCGA-DU-7015	Unaltered	3		TCGA-EA-A3Y4	Unaltered	0
TCGA-B0-5108	Unaltered	135		TCGA-58-8387	Unaltered	50		TCGA-LI-A67I	Unaltered	15		TCGA-DU-A7T8	Unaltered	3		TCGA-EA-A411	Unaltered	0
TCGA-BF-A5EO	Unaltered	135		TCGA-66-2770	Unaltered	50		TCGA-QQ-A5VB	Unaltered	15		TCGA-E1-5303	Unaltered	3		TCGA-EA-A97N	Unaltered	0
TCGA-EL-A3T0	Unaltered	135		TCGA-66-2791	Unaltered	50		TCGA-5V-A9RR	Unaltered	15		TCGA-E1-5318	Unaltered	3		TCGA-EK-A2RE	Unaltered	0
TCGA-E9-A226	Unaltered	134		TCGA-3H-AB3T	Unaltered	50		TCGA-N5-A4RF	Unaltered	15		TCGA-E1-A7YN	Unaltered	3		TCGA-EK-A2RL	Unaltered	0
TCGA-DD-AAED	Unaltered	134		TCGA-EJ-A8FS	Unaltered	50		TCGA-N8-A4PP	Unaltered	15		TCGA-E1-A7Z4	Unaltered	3		TCGA-EK-A2RO	Unaltered	0
TCGA-AJ-A3IA	Unaltered	134		TCGA-N5-A4RT	Unaltered	50		TCGA-N8-A56S	Unaltered	15		TCGA-FG-5962	Unaltered	3		TCGA-EK-A3GN	Unaltered	0
TCGA-H4-A2HO	Unaltered	133		TCGA-BK-A0CC	Unaltered	50		TCGA-BG-A0VX	Unaltered	15		TCGA-FG-6691	Unaltered	3		TCGA-FU-A2QG	Unaltered	0
TCGA-55-7725	Unaltered	133		TCGA-FI-A2F9	Unaltered	50		TCGA-BS-A0V8	Unaltered	15		TCGA-FG-A710	Unaltered	3		TCGA-FU-A3EO	Unaltered	0
TCGA-B5-A11O	Unaltered	133		TCGA-4Z-AA7Y	Unaltered	49		TCGA-FG-A60K	Unaltered	14		TCGA-HT-7474	Unaltered	3		TCGA-FU-A3TX	Unaltered	0
TCGA-XF-AAN7	Unaltered	132		TCGA-DK-A1A7	Altered	49		TCGA-S9-A6TX	Unaltered	14		TCGA-HT-8018	Unaltered	3		TCGA-FU-A3WB	Unaltered	0
TCGA-A8-A097	Unaltered	132		TCGA-DU-8168	Unaltered	49		TCGA-S9-A6WH	Unaltered	14		TCGA-S9-A89Z	Unaltered	3		TCGA-GH-A9DA	Altered	0
TCGA-CQ-7068	Unaltered	132		TCGA-HT-7687	Unaltered	49		TCGA-A2-A04Y	Unaltered	14		TCGA-TM-A84I	Unaltered	3		TCGA-IR-A3LI	Unaltered	0
TCGA-A3-3383	Altered	132		TCGA-QH-A6CW	Unaltered	49		TCGA-A8-A082	Unaltered	14		TCGA-WY-A858	Unaltered	3		TCGA-JW-A5VG	Unaltered	0
TCGA-2Y-A9H1	Unaltered	132		TCGA-A2-A0D2	Unaltered	49		TCGA-A8-A096	Unaltered	14		TCGA-WY-A85E	Unaltered	3		TCGA-JW-A69B	Unaltered	0
TCGA-49-AAR3	Unaltered	132		TCGA-AN-A0FN	Unaltered	49		TCGA-B6-A0RE	Unaltered	14		TCGA-3C-AALI	Unaltered	3		TCGA-JW-A852	Unaltered	0
TCGA-MP-A4SV	Unaltered	132		TCGA-BH-A0DQ	Unaltered	49		TCGA-BH-A0C7	Unaltered	14		TCGA-A1-A0SF	Unaltered	3		TCGA-MA-AA3W	Unaltered	0
TCGA-2A-A8VO	Unaltered	132		TCGA-BH-A0HB	Unaltered	49		TCGA-E2-A15I	Unaltered	14		TCGA-A1-A0SM	Unaltered	3		TCGA-MA-AA3Y	Unaltered	0
TCGA-E5-A2PC	Unaltered	131		TCGA-D8-A27E	Unaltered	49		TCGA-EW-A6SA	Unaltered	14		TCGA-A2-A25D	Unaltered	3		TCGA-Q1-A5R1	Unaltered	0
TCGA-KQ-A41R	Unaltered	131		TCGA-E2-A1II	Unaltered	49		TCGA-LL-A6FQ	Unaltered	14		TCGA-A7-A26E	Unaltered	3		TCGA-Q1-A6DW	Unaltered	0
TCGA-XF-A9ST	Altered	131		TCGA-EW-A1P8	Unaltered	49		TCGA-DR-A0ZL	Unaltered	14		TCGA-A8-A090	Unaltered	3		TCGA-Q1-A73R	Unaltered	0
TCGA-B6-A0X5	Unaltered	131		TCGA-ZH-A8Y8	Unaltered	49		TCGA-ZJ-AB0H	Altered	14		TCGA-AC-A2B8	Unaltered	3		TCGA-UC-A7PI	Unaltered	0
TCGA-B2-5639	Altered	131		TCGA-AD-6888	Unaltered	49		TCGA-AF-A56N	Unaltered	14		TCGA-AO-A0J8	Unaltered	3		TCGA-VS-A8Q8	Unaltered	0
TCGA-CZ-4859	Unaltered	131		TCGA-06-2565	Unaltered	49		TCGA-A6-3808	Unaltered	14		TCGA-AR-A0U0	Unaltered	3		TCGA-VS-A8QH	Unaltered	0
TCGA-HE-A5NK	Unaltered	131		TCGA-CR-7399	Unaltered	49		TCGA-AA-3673	Unaltered	14		TCGA-AR-A0U3	Unaltered	3		TCGA-VS-A8QM	Unaltered	0
TCGA-95-7562	Unaltered	131		TCGA-T2-A6X2	Unaltered	49		TCGA-AA-3831	Unaltered	14		TCGA-AR-A1AK	Unaltered	3		TCGA-VS-A950	Unaltered	0
TCGA-60-2703	Unaltered	131		TCGA-A3-3313	Unaltered	49		TCGA-AA-3858	Unaltered	14		TCGA-AR-A1AN	Unaltered	3		TCGA-VS-A958	Altered	0
TCGA-AX-A0J0	Altered	131		TCGA-B8-4621	Unaltered	49		TCGA-CM-6167	Unaltered	14		TCGA-AR-A1AU	Unaltered	3		TCGA-VS-A9UC	Unaltered	0
TCGA-P3-A6T5	Unaltered	130		TCGA-CW-6090	Unaltered	49		TCGA-D5-6924	Unaltered	14		TCGA-B6-A0I9	Unaltered	3		TCGA-VS-A9UZ	Unaltered	0
TCGA-DD-A73A	Unaltered	130		TCGA-BQ-7059	Unaltered	49		TCGA-F4-6460	Unaltered	14		TCGA-B6-A0IC	Unaltered	3		TCGA-XS-A8TJ	Unaltered	0
TCGA-KR-A7K0	Unaltered	130		TCGA-CC-A1HT	Unaltered	49		TCGA-F4-6807	Unaltered	14		TCGA-B6-A0IH	Unaltered	3		TCGA-ZJ-AAXA	Unaltered	0
TCGA-55-8620	Unaltered	130		TCGA-DD-AACC	Unaltered	49		TCGA-G4-6303	Unaltered	14		TCGA-B6-A0IO	Unaltered	3		TCGA-ZJ-AAXF	Unaltered	0
TCGA-S7-A7WL	Unaltered	130		TCGA-ZS-A9CG	Unaltered	49		TCGA-FA-A86F	Unaltered	14		TCGA-B6-A0RO	Unaltered	3		TCGA-W5-AA2T	Unaltered	0
TCGA-B5-A11Y	Unaltered	130		TCGA-50-8459	Unaltered	49		TCGA-GS-A9TQ	Unaltered	14		TCGA-B6-A0X1	Unaltered	3		TCGA-W5-AA2W	Unaltered	0
TCGA-BH-A0AZ	Unaltered	129		TCGA-22-5491	Unaltered	49		TCGA-27-1832	Unaltered	14		TCGA-BH-A0BR	Unaltered	3		TCGA-WD-A7RX	Unaltered	0
TCGA-B8-5550	Unaltered	129		TCGA-60-2723	Altered	49		TCGA-CQ-5327	Unaltered	14		TCGA-BH-A0BV	Unaltered	3		TCGA-YR-A95A	Unaltered	0
TCGA-UZ-A9PU	Unaltered	129		TCGA-68-8250	Unaltered	49		TCGA-CR-7374	Unaltered	14		TCGA-BH-A0HI	Unaltered	3		TCGA-ZH-A8Y1	Unaltered	0
TCGA-55-6985	Unaltered	129		TCGA-QR-A6H4	Unaltered	49		TCGA-IQ-A61H	Unaltered	14		TCGA-BH-A204	Unaltered	3		TCGA-AF-2687	Unaltered	0
TCGA-91-6828	Unaltered	129		TCGA-G9-6343	Unaltered	49		TCGA-UF-A7JH	Unaltered	14		TCGA-BH-A2L8	Unaltered	3		TCGA-AG-3896	Unaltered	0
TCGA-22-1012	Unaltered	129		TCGA-IS-A3K6	Unaltered	49		TCGA-B0-4698	Unaltered	14		TCGA-C8-A1HJ	Unaltered	3		TCGA-AG-3902	Unaltered	0
TCGA-63-7023	Unaltered	129		TCGA-BT-A20O	Unaltered	48		TCGA-CJ-5689	Unaltered	14		TCGA-D8-A1X9	Unaltered	3		TCGA-AH-6643	Unaltered	0
TCGA-66-2734	Unaltered	129		TCGA-GV-A3QF	Unaltered	48		TCGA-5P-A9K6	Unaltered	14		TCGA-D8-A1XY	Unaltered	3		TCGA-CI-6619	Unaltered	0
TCGA-NC-A5HP	Unaltered	129		TCGA-RY-A83X	Unaltered	48		TCGA-BQ-5886	Unaltered	14		TCGA-D8-A1XZ	Unaltered	3		TCGA-CL-5918	Unaltered	0
TCGA-A2-A1G4	Unaltered	128		TCGA-EW-A1OY	Unaltered	48		TCGA-CC-A5UD	Unaltered	14		TCGA-D8-A27K	Unaltered	3		TCGA-DC-6154	Unaltered	0
TCGA-E2-A155	Unaltered	128		TCGA-AG-3731	Altered	48		TCGA-DD-A4NG	Unaltered	14		TCGA-D8-A27N	Unaltered	3		TCGA-EF-5830	Unaltered	0
TCGA-S3-AA10	Unaltered	128		TCGA-EI-6883	Unaltered	48		TCGA-DD-A73E	Unaltered	14		TCGA-D8-A73X	Unaltered	3		TCGA-F5-6464	Unaltered	0
TCGA-CN-6020	Unaltered	128		TCGA-AA-3818	Unaltered	48		TCGA-G3-A25T	Unaltered	14		TCGA-E2-A15M	Unaltered	3		TCGA-F5-6863	Unaltered	0
TCGA-UF-A718	Unaltered	128		TCGA-AM-5820	Unaltered	48		TCGA-MI-A75I	Unaltered	14		TCGA-E2-A2P6	Unaltered	3		TCGA-AA-3511	Unaltered	0
TCGA-UF-A7J9	Unaltered	128		TCGA-D5-5537	Unaltered	48		TCGA-RC-A6M4	Unaltered	14		TCGA-E9-A1RC	Unaltered	3		TCGA-AA-3693	Unaltered	0
TCGA-GK-A6C7	Unaltered	128		TCGA-02-2483	Unaltered	48		TCGA-UB-A7MA	Unaltered	14		TCGA-EW-A2FS	Unaltered	3		TCGA-AA-3695	Unaltered	0
TCGA-Y8-A897	Unaltered	128		TCGA-76-4932	Unaltered	48		TCGA-50-5942	Altered	14		TCGA-EW-A423	Unaltered	3		TCGA-AA-3712	Unaltered	0
TCGA-MI-A75E	Unaltered	128		TCGA-CQ-7072	Unaltered	48		TCGA-55-7910	Unaltered	14		TCGA-LL-A5YN	Unaltered	3		TCGA-AA-3968	Unaltered	0
TCGA-55-8089	Unaltered	128		TCGA-CR-7380	Unaltered	48		TCGA-62-A46P	Altered	14		TCGA-OL-A5RW	Unaltered	3		TCGA-AA-A004	Unaltered	0
TCGA-22-5485	Unaltered	128		TCGA-CZ-4856	Unaltered	48		TCGA-73-4658	Altered	14		TCGA-OL-A66O	Unaltered	3		TCGA-AA-A01I	Unaltered	0
TCGA-98-7454	Unaltered	128		TCGA-CZ-5456	Altered	48		TCGA-MP-A4TJ	Unaltered	14		TCGA-BI-A0VR	Unaltered	3		TCGA-AA-A01X	Unaltered	0
TCGA-UD-AAC1	Unaltered	128		TCGA-CZ-5462	Unaltered	48		TCGA-34-5241	Unaltered	14		TCGA-C5-A1BF	Unaltered	3		TCGA-AZ-4682	Unaltered	0
TCGA-EY-A1GW	Unaltered	128		TCGA-B9-5156	Unaltered	48		TCGA-37-4129	Unaltered	14		TCGA-C5-A1BJ	Unaltered	3		TCGA-AZ-5407	Unaltered	0
TCGA-CV-5441	Altered	127		TCGA-MH-A562	Unaltered	48		TCGA-43-8118	Unaltered	14		TCGA-C5-A1MJ	Unaltered	3		TCGA-AZ-6607	Unaltered	0
TCGA-UF-A7JJ	Unaltered	127		TCGA-CC-A3M9	Unaltered	48		TCGA-56-1622	Unaltered	14		TCGA-C5-A7CK	Altered	3		TCGA-CM-5863	Unaltered	0
TCGA-B2-4098	Unaltered	127		TCGA-DD-AACT	Unaltered	48		TCGA-85-7843	Unaltered	14		TCGA-EX-A1H6	Unaltered	3		TCGA-CM-6164	Unaltered	0
TCGA-DD-AADF	Unaltered	127		TCGA-DD-AADV	Unaltered	48		TCGA-3A-A9J0	Unaltered	14		TCGA-FU-A3HY	Unaltered	3		TCGA-D5-6532	Unaltered	0
TCGA-55-7907	Unaltered	127		TCGA-XR-A8TG	Unaltered	48		TCGA-FB-AAQ1	Unaltered	14		TCGA-HM-A3JJ	Unaltered	3		TCGA-D5-6535	Unaltered	0
TCGA-69-8255	Unaltered	127		TCGA-05-4402	Unaltered	48		TCGA-G9-6496	Unaltered	14		TCGA-VS-A8EL	Unaltered	3		TCGA-D5-6537	Unaltered	0
TCGA-91-6836	Altered	127		TCGA-91-8496	Unaltered	48		TCGA-G9-7519	Unaltered	14		TCGA-VS-A9U7	Unaltered	3		TCGA-D5-6898	Unaltered	0
TCGA-NJ-A4YI	Unaltered	127		TCGA-L9-A743	Unaltered	48		TCGA-H9-A6BY	Unaltered	14		TCGA-3X-AAVE	Unaltered	3		TCGA-DM-A1D6	Unaltered	0
TCGA-77-7337	Unaltered	127		TCGA-33-AASB	Unaltered	48		TCGA-J4-A67N	Unaltered	14		TCGA-W5-AA2I	Unaltered	3		TCGA-DM-A1HA	Unaltered	0
TCGA-85-8049	Unaltered	127		TCGA-SC-AA5Z	Unaltered	48		TCGA-KK-A8IF	Unaltered	14		TCGA-W5-AA2R	Unaltered	3		TCGA-F4-6461	Unaltered	0
TCGA-DX-A8BX	Unaltered	127		TCGA-EJ-7786	Unaltered	48		TCGA-HB-A43Z	Unaltered	14		TCGA-W5-AA31	Unaltered	3		TCGA-G4-6321	Unaltered	0
TCGA-XF-AAMX	Unaltered	126		TCGA-ZG-A9N3	Unaltered	48		TCGA-ZM-AA0H	Unaltered	14		TCGA-ZD-A8I3	Unaltered	3		TCGA-NH-A6GA	Unaltered	0
TCGA-ZF-AA51	Unaltered	126		TCGA-ZB-A969	Unaltered	48		TCGA-3G-AB14	Unaltered	14		TCGA-ZH-A8Y4	Altered	3		TCGA-GR-A4D5	Unaltered	0
TCGA-DM-A28F	Unaltered	126		TCGA-EM-A4FV	Unaltered	48		TCGA-XM-A8RD	Unaltered	14		TCGA-AF-6136	Unaltered	3		TCGA-RQ-A68N	Unaltered	0
TCGA-UZ-A9Q0	Unaltered	126		TCGA-AX-A06J	Unaltered	48		TCGA-ZB-A96H	Unaltered	14		TCGA-AF-6672	Unaltered	3		TCGA-02-2486	Unaltered	0
TCGA-DD-AADJ	Unaltered	126		TCGA-D1-A15X	Altered	48		TCGA-DJ-A2QB	Unaltered	14		TCGA-AF-A56L	Unaltered	3		TCGA-06-2559	Unaltered	0
TCGA-EW-A1PB	Unaltered	125		TCGA-OR-A5K8	Unaltered	47		TCGA-ET-A40P	Unaltered	14		TCGA-AG-3592	Unaltered	3		TCGA-06-2561	Unaltered	0
TCGA-T3-A92N	Unaltered	125		TCGA-BT-A0YX	Unaltered	47		TCGA-H2-A422	Unaltered	14		TCGA-AG-A008	Unaltered	3		TCGA-06-2564	Unaltered	0
TCGA-BP-5189	Unaltered	125		TCGA-CU-A5W6	Unaltered	47		TCGA-AJ-A5DW	Altered	14		TCGA-DY-A1DC	Unaltered	3		TCGA-06-5408	Unaltered	0
TCGA-78-7147	Unaltered	125		TCGA-DK-A2I1	Unaltered	47		TCGA-EY-A2OQ	Unaltered	14		TCGA-EI-6513	Unaltered	3		TCGA-06-5414	Unaltered	0
TCGA-39-5034	Unaltered	125		TCGA-FD-A3B6	Unaltered	47		TCGA-YZ-A985	Unaltered	14		TCGA-A6-5657	Unaltered	3		TCGA-06-5856	Unaltered	0
TCGA-V1-A8MM	Unaltered	125		TCGA-A1-A0SN	Unaltered	47		TCGA-GD-A6C6	Unaltered	13		TCGA-AA-3688	Unaltered	3		TCGA-06-5858	Unaltered	0
TCGA-BF-A3DL	Unaltered	125		TCGA-BH-A18Q	Unaltered	47		TCGA-GU-A42Q	Unaltered	13		TCGA-AA-3841	Unaltered	3		TCGA-14-2554	Unaltered	0
TCGA-2G-AAKL	Unaltered	125		TCGA-OL-A5D8	Unaltered	47		TCGA-XF-A9SM	Unaltered	13		TCGA-AA-3848	Unaltered	3		TCGA-19-1390	Unaltered	0
TCGA-E7-A97Q	Unaltered	124		TCGA-C5-A8YQ	Unaltered	47		TCGA-XF-AAMY	Unaltered	13		TCGA-AA-A01Z	Unaltered	3		TCGA-26-1442	Unaltered	0
TCGA-ZF-A9RC	Altered	124		TCGA-AA-3994	Unaltered	47		TCGA-DU-A6S6	Unaltered	13		TCGA-AA-A02O	Unaltered	3		TCGA-26-5132	Unaltered	0
TCGA-AC-A2FF	Unaltered	124		TCGA-CK-4952	Unaltered	47		TCGA-HW-7495	Unaltered	13		TCGA-AZ-6600	Unaltered	3		TCGA-26-5139	Unaltered	0
TCGA-CM-5864	Unaltered	124		TCGA-5M-AATA	Unaltered	47		TCGA-P5-A5EZ	Unaltered	13		TCGA-CM-5344	Unaltered	3		TCGA-27-1834	Unaltered	0
TCGA-CN-6997	Unaltered	124		TCGA-28-1747	Unaltered	47		TCGA-QH-A6CU	Unaltered	13		TCGA-CM-6676	Unaltered	3		TCGA-27-2523	Unaltered	0
TCGA-CN-A641	Unaltered	124		TCGA-CN-6013	Unaltered	47		TCGA-QH-A6X4	Unaltered	13		TCGA-D5-6538	Unaltered	3		TCGA-27-2524	Unaltered	0
TCGA-DW-7836	Unaltered	124		TCGA-CC-A123	Unaltered	47		TCGA-S9-A7R7	Unaltered	13		TCGA-DM-A0XF	Altered	3		TCGA-28-1753	Unaltered	0
TCGA-ZP-A9D4	Unaltered	124		TCGA-G3-A25V	Unaltered	47		TCGA-A8-A0A6	Unaltered	13		TCGA-DM-A1DA	Altered	3		TCGA-28-5208	Altered	0
TCGA-55-7995	Unaltered	124		TCGA-UB-A7MC	Unaltered	47		TCGA-AR-A2LK	Unaltered	13		TCGA-F4-6806	Unaltered	3		TCGA-28-5220	Unaltered	0
TCGA-75-5146	Unaltered	124		TCGA-05-4410	Unaltered	47		TCGA-E9-A22G	Unaltered	13		TCGA-G4-6295	Unaltered	3		TCGA-32-1982	Unaltered	0
TCGA-98-A53B	Unaltered	124		TCGA-50-5072	Unaltered	47		TCGA-S3-A6ZF	Unaltered	13		TCGA-G4-6306	Unaltered	3		TCGA-41-2571	Unaltered	0
TCGA-TS-A7P0	Unaltered	124		TCGA-75-6212	Unaltered	47		TCGA-C5-A1BL	Unaltered	13		TCGA-G4-6322	Unaltered	3		TCGA-14-0871	Unaltered	0
TCGA-AJ-A23N	Unaltered	124		TCGA-78-7158	Unaltered	47		TCGA-C5-A2M1	Unaltered	13		TCGA-5M-AAT5	Unaltered	3		TCGA-15-0742	Unaltered	0
TCGA-E9-A295	Unaltered	123		TCGA-22-4599	Unaltered	47		TCGA-DG-A2KK	Unaltered	13		TCGA-FA-A4XK	Unaltered	3		TCGA-06-0187	Unaltered	0
TCGA-QK-AA3K	Unaltered	123		TCGA-56-8504	Unaltered	47		TCGA-VS-A9U5	Unaltered	13		TCGA-26-5134	Altered	3		TCGA-06-0744	Unaltered	0
TCGA-EP-A2KA	Unaltered	123		TCGA-58-8391	Unaltered	47		TCGA-ZX-AA5X	Unaltered	13		TCGA-41-4097	Unaltered	3		TCGA-06-0882	Unaltered	0
TCGA-50-5941	Altered	123		TCGA-J9-A8CM	Unaltered	47		TCGA-AF-4110	Unaltered	13		TCGA-CN-4742	Unaltered	3		TCGA-06-0745	Unaltered	0
TCGA-55-8614	Unaltered	123		TCGA-YL-A8SQ	Unaltered	47		TCGA-AG-3878	Unaltered	13		TCGA-CN-5367	Unaltered	3		TCGA-BA-5555	Unaltered	0
TCGA-73-4666	Altered	123		TCGA-CF-A3MH	Unaltered	46		TCGA-EI-6506	Unaltered	13		TCGA-CN-6016	Unaltered	3		TCGA-BA-5557	Unaltered	0
TCGA-51-4080	Unaltered	123		TCGA-FD-A3NA	Unaltered	46		TCGA-EI-6509	Unaltered	13		TCGA-CQ-5326	Unaltered	3		TCGA-BA-5559	Unaltered	0
TCGA-YL-A8SB	Unaltered	123		TCGA-ZF-AA54	Unaltered	46		TCGA-A6-2681	Unaltered	13		TCGA-CQ-6228	Unaltered	3		TCGA-BA-A6DI	Unaltered	0
TCGA-CU-A0YN	Unaltered	122		TCGA-FG-6688	Altered	46		TCGA-A6-A567	Unaltered	13		TCGA-CR-7373	Unaltered	3		TCGA-C9-A480	Unaltered	0
TCGA-G2-AA3F	Unaltered	122		TCGA-AO-A03P	Unaltered	46		TCGA-AA-3510	Unaltered	13		TCGA-CR-7379	Unaltered	3		TCGA-CN-6022	Unaltered	0
TCGA-AN-A0FK	Unaltered	122		TCGA-AR-A1AH	Unaltered	46		TCGA-AA-3837	Unaltered	13		TCGA-CR-7385	Unaltered	3		TCGA-CN-6023	Unaltered	0
TCGA-DM-A28M	Unaltered	122		TCGA-AR-A5QQ	Unaltered	46		TCGA-AA-3952	Unaltered	13		TCGA-CV-5432	Unaltered	3		TCGA-CN-6994	Unaltered	0
TCGA-CV-5440	Unaltered	122		TCGA-DR-A0ZM	Unaltered	46		TCGA-AA-3956	Unaltered	13		TCGA-CV-6953	Unaltered	3		TCGA-CN-A499	Unaltered	0
TCGA-BP-5004	Unaltered	122		TCGA-A6-4105	Unaltered	46		TCGA-AA-A03F	Unaltered	13		TCGA-CV-7102	Unaltered	3		TCGA-CN-A6UY	Unaltered	0
TCGA-BP-5168	Unaltered	122		TCGA-AD-6890	Unaltered	46		TCGA-AD-6963	Unaltered	13		TCGA-CV-7411	Unaltered	3		TCGA-CN-A6V6	Unaltered	0
TCGA-CZ-5465	Unaltered	122		TCGA-06-0174	Unaltered	46		TCGA-BA-4078	Unaltered	13		TCGA-CV-7430	Unaltered	3		TCGA-CN-A6V7	Unaltered	0
TCGA-18-5592	Unaltered	122		TCGA-06-0749	Unaltered	46		TCGA-CN-4739	Unaltered	13		TCGA-CV-A45P	Unaltered	3		TCGA-CQ-5325	Unaltered	0
TCGA-85-8288	Unaltered	122		TCGA-F7-A623	Unaltered	46		TCGA-CV-7248	Unaltered	13		TCGA-D6-A6EP	Unaltered	3		TCGA-CQ-5333	Unaltered	0
TCGA-85-A5B5	Unaltered	122		TCGA-QK-A6V9	Unaltered	46		TCGA-QK-A6IJ	Unaltered	13		TCGA-DQ-7591	Unaltered	3		TCGA-CQ-6219	Unaltered	0
TCGA-4Z-AA7M	Unaltered	121		TCGA-KL-8332	Unaltered	46		TCGA-B0-4712	Altered	13		TCGA-KU-A6H8	Unaltered	3		TCGA-CQ-6224	Unaltered	0
TCGA-HT-7694	Unaltered	121		TCGA-B8-A54F	Unaltered	46		TCGA-B0-5077	Unaltered	13		TCGA-MT-A51X	Unaltered	3		TCGA-CQ-6227	Unaltered	0
TCGA-BP-5176	Unaltered	121		TCGA-CZ-5986	Unaltered	46		TCGA-BP-4801	Unaltered	13		TCGA-MZ-A5BI	Unaltered	3		TCGA-CR-6470	Unaltered	0
TCGA-MM-A563	Unaltered	121		TCGA-MH-A561	Unaltered	46		TCGA-BP-5008	Unaltered	13		TCGA-QK-A8ZB	Unaltered	3		TCGA-CR-6487	Unaltered	0
TCGA-GL-A59T	Unaltered	121		TCGA-55-7227	Unaltered	46		TCGA-BP-5198	Altered	13		TCGA-UF-A7JC	Unaltered	3		TCGA-CR-7377	Unaltered	0
TCGA-2Y-A9H0	Unaltered	121		TCGA-J2-A4AG	Unaltered	46		TCGA-EU-5905	Unaltered	13		TCGA-KL-8346	Unaltered	3		TCGA-CR-7382	Unaltered	0
TCGA-38-4626	Unaltered	121		TCGA-43-6771	Unaltered	46		TCGA-G6-A8L8	Unaltered	13		TCGA-KN-8431	Unaltered	3		TCGA-CV-5970	Unaltered	0
TCGA-49-4514	Unaltered	121		TCGA-60-2704	Unaltered	46		TCGA-2Z-A9JO	Unaltered	13		TCGA-A3-3378	Unaltered	3		TCGA-CV-5977	Unaltered	0
TCGA-77-7463	Unaltered	121		TCGA-ER-A194	Unaltered	46		TCGA-A4-A6HP	Unaltered	13		TCGA-AK-3429	Unaltered	3		TCGA-CV-6436	Unaltered	0
TCGA-DK-AA6L	Unaltered	120		TCGA-DK-A1A5	Altered	45		TCGA-BQ-5879	Unaltered	13		TCGA-B0-5695	Unaltered	3		TCGA-CV-6933	Unaltered	0
TCGA-UY-A8OB	Unaltered	120		TCGA-DK-A6AW	Unaltered	45		TCGA-BQ-5884	Unaltered	13		TCGA-BP-4968	Unaltered	3		TCGA-CV-6943	Unaltered	0
TCGA-SS-A7HO	Unaltered	120		TCGA-A2-A0D3	Unaltered	45		TCGA-G7-6795	Unaltered	13		TCGA-BP-5169	Altered	3		TCGA-CV-7090	Unaltered	0
TCGA-B0-4945	Unaltered	120		TCGA-A2-A0T4	Unaltered	45		TCGA-2Y-A9H8	Unaltered	13		TCGA-BP-5180	Unaltered	3		TCGA-CV-7261	Unaltered	0
TCGA-B9-4114	Unaltered	120		TCGA-AN-A0XS	Unaltered	45		TCGA-DD-A4ND	Unaltered	13		TCGA-CJ-4907	Unaltered	3		TCGA-CV-7429	Unaltered	0
TCGA-2Y-A9GX	Unaltered	120		TCGA-BH-A0DS	Unaltered	45		TCGA-DD-AACL	Unaltered	13		TCGA-DV-A4VZ	Unaltered	3		TCGA-CV-A45O	Unaltered	0
TCGA-43-8116	Unaltered	120		TCGA-DS-A0VM	Unaltered	45		TCGA-FV-A495	Unaltered	13		TCGA-A4-A5Y0	Unaltered	3		TCGA-CV-A45R	Unaltered	0
TCGA-MQ-A4LJ	Unaltered	120		TCGA-AZ-4616	Unaltered	45		TCGA-KR-A7K7	Unaltered	13		TCGA-AL-3466	Unaltered	3		TCGA-CV-A45X	Unaltered	0
TCGA-AX-A2H4	Unaltered	120		TCGA-06-0747	Unaltered	45		TCGA-05-4418	Unaltered	13		TCGA-BQ-5893	Unaltered	3		TCGA-CV-A6JY	Unaltered	0
TCGA-A2-A0EO	Unaltered	119		TCGA-B8-5164	Unaltered	45		TCGA-55-5899	Unaltered	13		TCGA-F9-A8NY	Unaltered	3		TCGA-CX-7085	Unaltered	0
TCGA-CJ-5676	Altered	119		TCGA-BP-5177	Unaltered	45		TCGA-69-7761	Unaltered	13		TCGA-G7-A8LC	Unaltered	3		TCGA-D6-6515	Unaltered	0
TCGA-FV-A4ZP	Unaltered	119		TCGA-5P-A9K2	Unaltered	45		TCGA-97-7552	Unaltered	13		TCGA-P4-AAVM	Unaltered	3		TCGA-D6-A6EQ	Unaltered	0
TCGA-56-7731	Unaltered	119		TCGA-A4-A5XZ	Unaltered	45		TCGA-33-A4WN	Unaltered	13		TCGA-CC-5263	Unaltered	3		TCGA-DQ-5624	Altered	0
TCGA-56-7823	Unaltered	119		TCGA-BQ-5890	Altered	45		TCGA-52-7811	Unaltered	13		TCGA-DD-A4NO	Unaltered	3		TCGA-F7-A50G	Unaltered	0
TCGA-66-2785	Unaltered	119		TCGA-2Y-A9H5	Unaltered	45		TCGA-60-2726	Unaltered	13		TCGA-DD-AAD6	Unaltered	3		TCGA-F7-A61W	Unaltered	0
TCGA-B5-A5OD	Unaltered	119		TCGA-G3-A5SL	Unaltered	45		TCGA-98-A53J	Unaltered	13		TCGA-K7-A5RG	Unaltered	3		TCGA-F7-A620	Unaltered	0
TCGA-S9-A89V	Unaltered	118		TCGA-RC-A6M5	Unaltered	45		TCGA-3U-A98D	Unaltered	13		TCGA-RC-A6M3	Unaltered	3		TCGA-HD-8224	Unaltered	0
TCGA-CJ-5672	Unaltered	118		TCGA-UB-A7MD	Unaltered	45		TCGA-IB-A5SP	Unaltered	13		TCGA-UB-AA0U	Unaltered	3		TCGA-HD-8634	Unaltered	0
TCGA-22-5478	Unaltered	118		TCGA-75-7025	Altered	45		TCGA-EJ-7789	Unaltered	13		TCGA-XR-A8TD	Unaltered	3		TCGA-IQ-A6SH	Unaltered	0
TCGA-63-7021	Unaltered	118		TCGA-22-4595	Unaltered	45		TCGA-J4-A67T	Unaltered	13		TCGA-XR-A8TE	Unaltered	3		TCGA-P3-A6T2	Unaltered	0
TCGA-77-6845	Unaltered	118		TCGA-63-A5M9	Unaltered	45		TCGA-V1-A9Z9	Altered	13		TCGA-ZP-A9D2	Unaltered	3		TCGA-QK-AA3J	Unaltered	0
TCGA-X6-A8C2	Unaltered	118		TCGA-FB-AAQ2	Unaltered	45		TCGA-DX-A6B8	Unaltered	13		TCGA-38-6178	Unaltered	3		TCGA-T2-A6X0	Unaltered	0
TCGA-AJ-A6NU	Unaltered	118		TCGA-XJ-A83F	Unaltered	45		TCGA-IE-A4EH	Unaltered	13		TCGA-55-1594	Unaltered	3		TCGA-UF-A71E	Unaltered	0
TCGA-BS-A0WQ	Unaltered	118		TCGA-DX-A7EO	Unaltered	45		TCGA-2G-AAM4	Unaltered	13		TCGA-55-6980	Unaltered	3		TCGA-UF-A7JK	Unaltered	0
TCGA-E7-A541	Unaltered	117		TCGA-4X-A9FB	Unaltered	45		TCGA-ZB-A96E	Unaltered	13		TCGA-62-A471	Unaltered	3		TCGA-WA-A7H4	Unaltered	0
TCGA-G2-A2EO	Unaltered	117		TCGA-ZC-AAA7	Unaltered	45		TCGA-E8-A417	Unaltered	13		TCGA-64-1680	Unaltered	3		TCGA-KL-8324	Unaltered	0
TCGA-DU-7299	Unaltered	117		TCGA-EO-A3AS	Unaltered	45		TCGA-FK-A4UB	Unaltered	13		TCGA-75-5147	Unaltered	3		TCGA-KL-8331	Unaltered	0
TCGA-QH-A65R	Unaltered	117		TCGA-CF-A47T	Unaltered	44		TCGA-IM-A4EB	Unaltered	13		TCGA-78-7162	Unaltered	3		TCGA-KL-8336	Unaltered	0
TCGA-B6-A1KC	Unaltered	117		TCGA-A7-A4SD	Unaltered	44		TCGA-A5-A0R9	Unaltered	13		TCGA-97-8176	Unaltered	3		TCGA-KM-8477	Unaltered	0
TCGA-BB-4227	Unaltered	117		TCGA-AC-A3YJ	Unaltered	44		TCGA-D1-A16V	Unaltered	13		TCGA-NJ-A55O	Unaltered	3		TCGA-KN-8422	Unaltered	0
TCGA-CV-7446	Unaltered	117		TCGA-AR-A24Z	Unaltered	44		TCGA-D1-A3DH	Unaltered	13		TCGA-34-5928	Unaltered	3		TCGA-KN-8433	Unaltered	0
TCGA-CC-A7IJ	Unaltered	117		TCGA-E2-A574	Unaltered	44		TCGA-VD-A8KL	Unaltered	13		TCGA-52-7809	Altered	3		TCGA-KN-8434	Unaltered	0
TCGA-DD-AAE3	Unaltered	117		TCGA-GM-A2DL	Unaltered	44		TCGA-V4-A9E7	Unaltered	13		TCGA-77-8156	Unaltered	3		TCGA-KO-8403	Unaltered	0
TCGA-55-A48Y	Altered	117		TCGA-EK-A2RM	Unaltered	44		TCGA-OR-A5K9	Altered	12		TCGA-85-A4QR	Unaltered	3		TCGA-KO-8415	Unaltered	0
TCGA-66-2773	Unaltered	117		TCGA-ZJ-A8QR	Unaltered	44		TCGA-DK-A2I2	Unaltered	12		TCGA-92-7341	Unaltered	3		TCGA-A3-3374	Unaltered	0
TCGA-FR-A728	Unaltered	117		TCGA-DC-6160	Unaltered	44		TCGA-DK-AA6U	Unaltered	12		TCGA-22-0944	Unaltered	3		TCGA-AK-3426	Unaltered	0
TCGA-OR-A5LD	Unaltered	116		TCGA-76-4926	Unaltered	44		TCGA-DU-5854	Unaltered	12		TCGA-TS-A7PB	Altered	3		TCGA-AK-3427	Unaltered	0
TCGA-DK-A6B1	Unaltered	116		TCGA-BA-A4II	Unaltered	44		TCGA-HT-A5RB	Unaltered	12		TCGA-ZN-A9VU	Unaltered	3		TCGA-B0-5100	Unaltered	0
TCGA-GC-A3RB	Unaltered	116		TCGA-CN-5355	Unaltered	44		TCGA-A2-A0EM	Unaltered	12		TCGA-3A-A9IH	Unaltered	3		TCGA-B0-5400	Unaltered	0
TCGA-HT-7860	Unaltered	116		TCGA-B0-5092	Unaltered	44		TCGA-A2-A3XU	Unaltered	12		TCGA-F2-A8YN	Unaltered	3		TCGA-B0-5402	Altered	0
TCGA-E2-A15S	Unaltered	116		TCGA-2Z-A9JE	Unaltered	44		TCGA-AN-A046	Altered	12		TCGA-HZ-8636	Unaltered	3		TCGA-B0-5697	Unaltered	0
TCGA-CM-6675	Unaltered	116		TCGA-IZ-8196	Unaltered	44		TCGA-AO-A03L	Unaltered	12		TCGA-HZ-A4BK	Unaltered	3		TCGA-B2-3923	Unaltered	0
TCGA-NH-A50V	Unaltered	116		TCGA-5C-A9VH	Unaltered	44		TCGA-AO-A12D	Unaltered	12		TCGA-IB-7891	Unaltered	3		TCGA-B8-4619	Unaltered	0
TCGA-A4-A7UZ	Unaltered	116		TCGA-55-7914	Unaltered	44		TCGA-AO-A1KT	Unaltered	12		TCGA-IB-A5SO	Unaltered	3		TCGA-BP-4163	Unaltered	0
TCGA-SX-A7SP	Unaltered	116		TCGA-67-3772	Unaltered	44		TCGA-AR-A0TV	Unaltered	12		TCGA-IB-AAUO	Unaltered	3		TCGA-BP-4981	Unaltered	0
TCGA-63-A5MS	Unaltered	116		TCGA-CH-5737	Unaltered	44		TCGA-BH-A0BL	Unaltered	12		TCGA-LB-A7SX	Unaltered	3		TCGA-BP-4998	Unaltered	0
TCGA-J1-A4AH	Unaltered	116		TCGA-G9-6498	Unaltered	44		TCGA-BH-A0DH	Unaltered	12		TCGA-S4-A8RM	Unaltered	3		TCGA-BP-5001	Unaltered	0
TCGA-LK-A4O7	Unaltered	116		TCGA-BJ-A45D	Unaltered	44		TCGA-BH-A0HO	Unaltered	12		TCGA-S4-A8RO	Unaltered	3		TCGA-CJ-6033	Unaltered	0
TCGA-ZN-A9VW	Altered	116		TCGA-OR-A5J2	Unaltered	43		TCGA-E2-A15P	Unaltered	12		TCGA-S4-A8RP	Unaltered	3		TCGA-CZ-5458	Unaltered	0
TCGA-EJ-7325	Unaltered	116		TCGA-C4-A0F7	Unaltered	43		TCGA-E9-A249	Unaltered	12		TCGA-QR-A6H1	Unaltered	3		TCGA-MW-A4EC	Unaltered	0
TCGA-26-5133	Unaltered	115		TCGA-GV-A3JZ	Unaltered	43		TCGA-GM-A2DH	Unaltered	12		TCGA-RW-A68F	Unaltered	3		TCGA-2Z-A9J7	Unaltered	0
TCGA-B0-4852	Altered	115		TCGA-ZF-AA5N	Unaltered	43		TCGA-C5-A7CL	Unaltered	12		TCGA-RW-A8AZ	Unaltered	3		TCGA-5P-A9KH	Unaltered	0
TCGA-CZ-5466	Unaltered	115		TCGA-PL-A8LV	Unaltered	43		TCGA-C5-A907	Unaltered	12		TCGA-WB-A815	Unaltered	3		TCGA-A4-8312	Unaltered	0
TCGA-A4-7734	Unaltered	115		TCGA-C5-A8XK	Unaltered	43		TCGA-AG-3893	Unaltered	12		TCGA-CH-5745	Unaltered	3		TCGA-B9-A5W7	Unaltered	0
TCGA-43-7657	Unaltered	115		TCGA-EK-A2RC	Unaltered	43		TCGA-AG-A026	Unaltered	12		TCGA-EJ-5526	Unaltered	3		TCGA-BQ-5887	Unaltered	0
TCGA-66-2755	Unaltered	115		TCGA-FU-A23L	Unaltered	43		TCGA-A6-6649	Unaltered	12		TCGA-EJ-8474	Unaltered	3		TCGA-DW-7842	Unaltered	0
TCGA-NC-A5HG	Unaltered	115		TCGA-5M-AAT4	Unaltered	43		TCGA-AA-3496	Unaltered	12		TCGA-EJ-A65B	Unaltered	3		TCGA-DZ-6134	Unaltered	0
TCGA-E5-A4U1	Unaltered	114		TCGA-CM-5349	Unaltered	43		TCGA-AD-6899	Unaltered	12		TCGA-G9-6365	Unaltered	3		TCGA-F9-A4JJ	Unaltered	0
TCGA-FD-A3SM	Unaltered	114		TCGA-CN-4730	Unaltered	43		TCGA-CM-6169	Unaltered	12		TCGA-G9-7509	Unaltered	3		TCGA-J7-A8I2	Unaltered	0
TCGA-A2-A25B	Unaltered	114		TCGA-CN-5370	Unaltered	43		TCGA-06-0129	Unaltered	12		TCGA-HC-7211	Unaltered	3		TCGA-KV-A6GE	Unaltered	0
TCGA-A8-A07P	Unaltered	114		TCGA-A3-3387	Unaltered	43		TCGA-CN-6998	Unaltered	12		TCGA-HC-7819	Unaltered	3		TCGA-MH-A855	Unaltered	0
TCGA-BH-A0WA	Unaltered	114		TCGA-BP-5183	Unaltered	43		TCGA-CN-A63V	Unaltered	12		TCGA-HC-A6AL	Unaltered	3		TCGA-O9-A75Z	Unaltered	0
TCGA-AA-3971	Unaltered	114		TCGA-CJ-4636	Unaltered	43		TCGA-CV-6950	Unaltered	12		TCGA-HC-A6AP	Unaltered	3		TCGA-BC-A10R	Unaltered	0
TCGA-BA-5558	Unaltered	114		TCGA-DW-7838	Unaltered	43		TCGA-D6-A6EN	Unaltered	12		TCGA-HC-A76W	Altered	3		TCGA-CC-A9FS	Unaltered	0
TCGA-6D-AA2E	Unaltered	114		TCGA-WN-AB4C	Unaltered	43		TCGA-A3-A8OU	Unaltered	12		TCGA-HI-7169	Unaltered	3		TCGA-DD-A1EK	Unaltered	0
TCGA-B0-4816	Unaltered	114		TCGA-05-4434	Unaltered	43		TCGA-BP-4965	Unaltered	12		TCGA-KC-A7F6	Unaltered	3		TCGA-DD-A39X	Unaltered	0
TCGA-2Z-A9J2	Unaltered	114		TCGA-33-AASJ	Unaltered	43		TCGA-A4-7828	Unaltered	12		TCGA-KK-A6E1	Unaltered	3		TCGA-DD-A3A3	Unaltered	0
TCGA-B1-A656	Altered	114		TCGA-34-5927	Altered	43		TCGA-BQ-7055	Unaltered	12		TCGA-KK-A6E8	Unaltered	3		TCGA-DD-A4NV	Unaltered	0
TCGA-91-8499	Unaltered	114		TCGA-3H-AB3U	Altered	43		TCGA-GL-7966	Unaltered	12		TCGA-KK-A7AZ	Unaltered	3		TCGA-DD-A73F	Altered	0
TCGA-EJ-A65E	Unaltered	114		TCGA-YL-A8S8	Unaltered	43		TCGA-IZ-8195	Unaltered	12		TCGA-KK-A7B4	Unaltered	3		TCGA-DD-AAC9	Unaltered	0
TCGA-AJ-A3OK	Altered	114		TCGA-E8-A2EA	Unaltered	43		TCGA-3K-AAZ8	Unaltered	12		TCGA-KK-A8IB	Unaltered	3		TCGA-DD-AAD8	Unaltered	0
TCGA-EY-A1GX	Unaltered	114		TCGA-EO-A2CH	Unaltered	43		TCGA-DD-A4NQ	Unaltered	12		TCGA-KK-A8ID	Unaltered	3		TCGA-DD-AADP	Unaltered	0
TCGA-ZF-A9R4	Unaltered	113		TCGA-BT-A20N	Unaltered	42		TCGA-DD-AACE	Unaltered	12		TCGA-V1-A8WV	Unaltered	3		TCGA-DD-AADY	Unaltered	0
TCGA-CV-7418	Unaltered	113		TCGA-BT-A20R	Altered	42		TCGA-ED-A4XI	Unaltered	12		TCGA-V1-A9OQ	Altered	3		TCGA-DD-AAE4	Unaltered	0
TCGA-P3-A5QF	Unaltered	113		TCGA-E7-A97P	Unaltered	42		TCGA-G3-A7M6	Unaltered	12		TCGA-VN-A88Q	Unaltered	3		TCGA-DD-AAVQ	Unaltered	0
TCGA-B4-5836	Unaltered	113		TCGA-A2-A4S3	Unaltered	42		TCGA-PD-A5DF	Unaltered	12		TCGA-YL-A8SO	Unaltered	3		TCGA-DD-AAVX	Unaltered	0
TCGA-CJ-4640	Unaltered	113		TCGA-A7-A4SC	Unaltered	42		TCGA-35-4123	Unaltered	12		TCGA-ZG-A9L2	Unaltered	3		TCGA-ED-A5KG	Unaltered	0
TCGA-B3-8121	Unaltered	113		TCGA-AR-A1AO	Unaltered	42		TCGA-38-4628	Unaltered	12		TCGA-DX-A48R	Unaltered	3		TCGA-ED-A627	Unaltered	0
TCGA-G7-7502	Unaltered	113		TCGA-E9-A1RH	Unaltered	42		TCGA-44-2668	Unaltered	12		TCGA-DX-AB2G	Unaltered	3		TCGA-ED-A66X	Unaltered	0
TCGA-DD-AADI	Unaltered	113		TCGA-A6-5666	Unaltered	42		TCGA-55-7724	Unaltered	12		TCGA-DX-AB2P	Unaltered	3		TCGA-ED-A82E	Unaltered	0
TCGA-G3-A25Z	Unaltered	113		TCGA-27-1835	Unaltered	42		TCGA-75-5125	Unaltered	12		TCGA-IE-A3OV	Unaltered	3		TCGA-ED-A8O5	Unaltered	0
TCGA-18-3406	Unaltered	113		TCGA-32-5222	Unaltered	42		TCGA-75-6207	Unaltered	12		TCGA-IS-A3K8	Unaltered	3		TCGA-EP-A3RK	Unaltered	0
TCGA-21-1082	Unaltered	113		TCGA-F7-A61V	Unaltered	42		TCGA-97-8174	Unaltered	12		TCGA-QQ-A5VA	Unaltered	3		TCGA-FV-A3I0	Unaltered	0
TCGA-GC-A3I6	Unaltered	112		TCGA-F7-A622	Unaltered	42		TCGA-97-8175	Unaltered	12		TCGA-WK-A8XS	Unaltered	3		TCGA-FV-A4ZQ	Unaltered	0
TCGA-H4-A2HQ	Unaltered	112		TCGA-QK-A652	Unaltered	42		TCGA-97-A4LX	Unaltered	12		TCGA-X6-A8C6	Unaltered	3		TCGA-G3-A7M8	Unaltered	0
TCGA-A2-A04P	Unaltered	112		TCGA-B0-5115	Unaltered	42		TCGA-63-A5MN	Unaltered	12		TCGA-EB-A299	Unaltered	3		TCGA-LG-A6GG	Unaltered	0
TCGA-A2-A0T5	Unaltered	112		TCGA-B0-5711	Unaltered	42		TCGA-98-A539	Unaltered	12		TCGA-EB-A431	Unaltered	3		TCGA-05-4433	Unaltered	0
TCGA-AR-A256	Unaltered	112		TCGA-CJ-4899	Unaltered	42		TCGA-TS-A7P3	Unaltered	12		TCGA-2G-AAGX	Unaltered	3		TCGA-05-5423	Unaltered	0
TCGA-AG-3742	Unaltered	112		TCGA-CZ-5987	Unaltered	42		TCGA-HV-A7OP	Unaltered	12		TCGA-YU-A90W	Unaltered	3		TCGA-44-5645	Unaltered	0
TCGA-CJ-5671	Altered	112		TCGA-DW-7963	Unaltered	42		TCGA-HZ-A49I	Unaltered	12		TCGA-2G-AALW	Unaltered	3		TCGA-44-A47G	Unaltered	0
TCGA-CC-A5UE	Unaltered	112		TCGA-DD-A114	Unaltered	42		TCGA-M8-A5N4	Unaltered	12		TCGA-XM-A8RE	Unaltered	3		TCGA-49-4490	Unaltered	0
TCGA-05-4389	Unaltered	112		TCGA-DD-A3A4	Unaltered	42		TCGA-HI-7170	Unaltered	12		TCGA-YT-A95D	Unaltered	3		TCGA-55-8096	Unaltered	0
TCGA-99-8028	Unaltered	112		TCGA-05-4250	Unaltered	42		TCGA-FX-A3NK	Unaltered	12		TCGA-ZB-A96K	Unaltered	3		TCGA-62-8402	Unaltered	0
TCGA-37-3789	Unaltered	112		TCGA-67-3773	Unaltered	42		TCGA-EB-A551	Unaltered	12		TCGA-BJ-A0Z2	Unaltered	3		TCGA-62-A46U	Unaltered	0
TCGA-V1-A9OH	Unaltered	112		TCGA-75-6211	Unaltered	42		TCGA-EB-A5SF	Unaltered	12		TCGA-DE-A0Y3	Unaltered	3		TCGA-67-3774	Unaltered	0
TCGA-AX-A05Y	Unaltered	112		TCGA-33-4587	Unaltered	42		TCGA-2G-AAF6	Unaltered	12		TCGA-E8-A432	Unaltered	3		TCGA-75-6203	Unaltered	0
TCGA-G2-AA3B	Unaltered	111		TCGA-63-7022	Unaltered	42		TCGA-2G-AAL5	Unaltered	12		TCGA-EL-A3CL	Unaltered	3		TCGA-78-7163	Unaltered	0
TCGA-S9-A7QZ	Unaltered	111		TCGA-EJ-5501	Unaltered	42		TCGA-DJ-A3UM	Unaltered	12		TCGA-EL-A3GP	Unaltered	3		TCGA-86-8280	Unaltered	0
TCGA-A8-A09A	Unaltered	111		TCGA-G9-6348	Unaltered	42		TCGA-N9-A4Q1	Unaltered	12		TCGA-EL-A3H5	Unaltered	3		TCGA-91-6835	Unaltered	0
TCGA-C8-A12N	Unaltered	111		TCGA-QQ-A8VB	Unaltered	42		TCGA-OR-A5L4	Unaltered	11		TCGA-EM-A22M	Unaltered	3		TCGA-91-A4BD	Unaltered	0
TCGA-D8-A3Z6	Unaltered	111		TCGA-BF-A5EQ	Unaltered	42		TCGA-BT-A20P	Unaltered	11		TCGA-FE-A236	Unaltered	3		TCGA-93-A4JP	Unaltered	0
TCGA-AA-3666	Unaltered	111		TCGA-ER-A2NB	Unaltered	42		TCGA-CU-A0YO	Unaltered	11		TCGA-H2-A26U	Unaltered	3		TCGA-97-8171	Unaltered	0
TCGA-CN-4731	Unaltered	111		TCGA-XE-AAOC	Unaltered	42		TCGA-DK-A2HX	Unaltered	11		TCGA-H2-A3RH	Unaltered	3		TCGA-MP-A4SY	Altered	0
TCGA-B0-5709	Unaltered	111		TCGA-AX-A3G1	Unaltered	42		TCGA-FD-A3SN	Unaltered	11		TCGA-IM-A41Y	Unaltered	3		TCGA-MP-A4T7	Unaltered	0
TCGA-2Z-A9JR	Unaltered	111		TCGA-VD-AA8T	Unaltered	42		TCGA-FT-A61P	Unaltered	11		TCGA-L6-A4EU	Unaltered	3		TCGA-NJ-A4YG	Unaltered	0
TCGA-Y8-A8S1	Unaltered	111		TCGA-OR-A5JY	Unaltered	41		TCGA-XF-AAMG	Unaltered	11		TCGA-N8-A4PI	Unaltered	3		TCGA-18-4083	Unaltered	0
TCGA-50-6593	Unaltered	111		TCGA-AC-A4ZE	Unaltered	41		TCGA-XF-AAN2	Unaltered	11		TCGA-NA-A5I1	Unaltered	3		TCGA-22-4605	Unaltered	0
TCGA-56-A4BW	Unaltered	111		TCGA-BH-A0E6	Unaltered	41		TCGA-DU-A6S7	Unaltered	11		TCGA-A5-AB3J	Unaltered	3		TCGA-22-5482	Unaltered	0
TCGA-66-2793	Unaltered	111		TCGA-AA-3977	Unaltered	41		TCGA-E1-A7YQ	Unaltered	11		TCGA-AJ-A3EM	Unaltered	3		TCGA-39-5028	Unaltered	0
TCGA-O2-A52W	Unaltered	111		TCGA-CM-4752	Unaltered	41		TCGA-HT-7470	Unaltered	11		TCGA-AP-A05P	Unaltered	3		TCGA-56-7580	Unaltered	0
TCGA-DK-A3IN	Unaltered	110		TCGA-FF-A7CX	Unaltered	41		TCGA-HT-7690	Unaltered	11		TCGA-AW-A1PO	Unaltered	3		TCGA-56-8304	Unaltered	0
TCGA-E7-A677	Unaltered	110		TCGA-4P-AA8J	Unaltered	41		TCGA-S9-A6U1	Unaltered	11		TCGA-AX-A3GB	Unaltered	3		TCGA-60-2722	Unaltered	0
TCGA-D8-A27H	Unaltered	110		TCGA-CN-5359	Unaltered	41		TCGA-AO-A0JA	Unaltered	11		TCGA-B5-A3F9	Unaltered	3		TCGA-92-8065	Unaltered	0
TCGA-B0-5701	Unaltered	110		TCGA-CQ-5334	Unaltered	41		TCGA-B6-A0IN	Unaltered	11		TCGA-D1-A0ZP	Unaltered	3		TCGA-NC-A5HE	Unaltered	0
TCGA-CJ-4634	Unaltered	110		TCGA-D6-6823	Unaltered	41		TCGA-E2-A107	Unaltered	11		TCGA-D1-A0ZV	Unaltered	3		TCGA-MQ-A4LC	Unaltered	0
TCGA-CJ-6027	Unaltered	110		TCGA-B0-5084	Unaltered	41		TCGA-E2-A14Y	Unaltered	11		TCGA-D1-A16J	Unaltered	3		TCGA-MQ-A4LI	Unaltered	0
TCGA-G7-6796	Unaltered	110		TCGA-B0-5107	Unaltered	41		TCGA-EW-A1J5	Altered	11		TCGA-EO-A3B1	Unaltered	3		TCGA-MQ-A4LM	Unaltered	0
TCGA-DD-AADO	Altered	110		TCGA-B4-5832	Unaltered	41		TCGA-C5-A7UC	Unaltered	11		TCGA-EY-A1GP	Unaltered	3		TCGA-TS-A7OZ	Unaltered	0
TCGA-78-7149	Unaltered	110		TCGA-BP-4985	Unaltered	41		TCGA-EX-A69M	Unaltered	11		TCGA-KP-A3VZ	Unaltered	3		TCGA-TS-A7P8	Unaltered	0
TCGA-78-7150	Altered	110		TCGA-EV-5902	Unaltered	41		TCGA-F5-6465	Unaltered	11		TCGA-VD-A8KO	Unaltered	3		TCGA-TS-A8AS	Unaltered	0
TCGA-43-2576	Unaltered	110		TCGA-44-6776	Unaltered	41		TCGA-QG-A5YX	Unaltered	11		TCGA-V4-A9E5	Unaltered	3		TCGA-UD-AAC5	Unaltered	0
TCGA-YL-A8SH	Unaltered	110		TCGA-55-8085	Unaltered	41		TCGA-06-0158	Unaltered	11		TCGA-OR-A5JJ	Unaltered	2		TCGA-UD-AAC6	Unaltered	0
TCGA-CU-A0YR	Unaltered	109		TCGA-86-A456	Unaltered	41		TCGA-BA-6868	Unaltered	11		TCGA-OR-A5JS	Unaltered	2		TCGA-UD-AAC7	Unaltered	0
TCGA-P5-A733	Unaltered	109		TCGA-58-A46L	Unaltered	41		TCGA-BA-6870	Unaltered	11		TCGA-OR-A5KY	Unaltered	2		TCGA-YS-A95C	Unaltered	0
TCGA-S9-A6WM	Unaltered	109		TCGA-60-2707	Unaltered	41		TCGA-BA-6871	Unaltered	11		TCGA-BT-A42E	Unaltered	2		TCGA-2J-AABF	Unaltered	0
TCGA-BH-A1F6	Unaltered	109		TCGA-66-2768	Unaltered	41		TCGA-BB-4217	Unaltered	11		TCGA-C4-A0F6	Unaltered	2		TCGA-2J-AABK	Unaltered	0
TCGA-E2-A15O	Unaltered	109		TCGA-66-2771	Unaltered	41		TCGA-CN-5364	Unaltered	11		TCGA-CF-A47Y	Unaltered	2		TCGA-2J-AABU	Unaltered	0
TCGA-VS-A8QC	Unaltered	109		TCGA-85-8664	Unaltered	41		TCGA-CN-6988	Unaltered	11		TCGA-DK-A1AE	Unaltered	2		TCGA-3A-A9IC	Unaltered	0
TCGA-A3-3367	Altered	109		TCGA-EM-A3O3	Unaltered	41		TCGA-CQ-6222	Unaltered	11		TCGA-E7-A4IJ	Unaltered	2		TCGA-3A-A9IU	Unaltered	0
TCGA-SX-A7SR	Unaltered	109		TCGA-AP-A05A	Altered	41		TCGA-CR-7371	Unaltered	11		TCGA-FD-A3B3	Unaltered	2		TCGA-3A-A9IX	Unaltered	0
TCGA-DD-AAEG	Unaltered	109		TCGA-AP-A1E0	Altered	41		TCGA-CV-6942	Unaltered	11		TCGA-FD-A5BU	Unaltered	2		TCGA-F2-A44G	Unaltered	0
TCGA-L9-A444	Unaltered	109		TCGA-BK-A0CB	Unaltered	41		TCGA-CV-7100	Unaltered	11		TCGA-FD-A6TE	Unaltered	2		TCGA-F2-A44H	Unaltered	0
TCGA-56-A5DS	Unaltered	109		TCGA-D1-A16D	Unaltered	41		TCGA-CV-7250	Unaltered	11		TCGA-GV-A3QH	Unaltered	2		TCGA-F2-A7TX	Unaltered	0
TCGA-VP-A872	Unaltered	109		TCGA-EO-A22X	Altered	41		TCGA-CV-7416	Unaltered	11		TCGA-GV-A6ZA	Unaltered	2		TCGA-FB-AAPQ	Unaltered	0
TCGA-BS-A0UJ	Unaltered	109		TCGA-EY-A212	Unaltered	41		TCGA-CV-7435	Unaltered	11		TCGA-LT-A8JT	Unaltered	2		TCGA-FB-AAPZ	Unaltered	0
TCGA-EY-A1GH	Unaltered	109		TCGA-ZF-A9R3	Unaltered	40		TCGA-CV-A6JZ	Unaltered	11		TCGA-XF-A8HC	Unaltered	2		TCGA-FB-AAQ0	Unaltered	0
TCGA-AN-A0FL	Unaltered	108		TCGA-HT-7616	Unaltered	40		TCGA-DQ-7592	Unaltered	11		TCGA-XF-A8HI	Unaltered	2		TCGA-FB-AAQ6	Unaltered	0
TCGA-QL-A97D	Unaltered	108		TCGA-E2-A158	Unaltered	40		TCGA-MT-A67A	Unaltered	11		TCGA-XF-A9SY	Unaltered	2		TCGA-HV-AA8V	Unaltered	0
TCGA-CR-6472	Unaltered	108		TCGA-CM-6677	Unaltered	40		TCGA-A3-A8OW	Unaltered	11		TCGA-CS-6668	Unaltered	2		TCGA-HZ-7926	Unaltered	0
TCGA-SX-A7SL	Unaltered	108		TCGA-FF-8043	Unaltered	40		TCGA-B0-5081	Altered	11		TCGA-CS-6670	Unaltered	2		TCGA-HZ-A49H	Unaltered	0
TCGA-55-8208	Unaltered	108		TCGA-CR-6481	Unaltered	40		TCGA-B0-5088	Unaltered	11		TCGA-DB-5279	Unaltered	2		TCGA-IB-7649	Unaltered	0
TCGA-97-7938	Unaltered	108		TCGA-B0-4710	Altered	40		TCGA-B0-5117	Unaltered	11		TCGA-DB-A4XH	Unaltered	2		TCGA-IB-7887	Unaltered	0
TCGA-79-5596	Unaltered	108		TCGA-B0-5075	Unaltered	40		TCGA-CJ-5679	Unaltered	11		TCGA-DB-A64P	Unaltered	2		TCGA-IB-7890	Unaltered	0
TCGA-NK-A5CR	Unaltered	108		TCGA-A4-8311	Unaltered	40		TCGA-2Z-A9J6	Unaltered	11		TCGA-DB-A64Q	Unaltered	2		TCGA-IB-A6UG	Unaltered	0
TCGA-3A-A9IZ	Unaltered	108		TCGA-SX-A71R	Unaltered	40		TCGA-B3-A6W5	Unaltered	11		TCGA-DB-A64S	Unaltered	2		TCGA-IB-AAUQ	Unaltered	0
TCGA-V1-A8MG	Unaltered	108		TCGA-05-4415	Unaltered	40		TCGA-BQ-7044	Unaltered	11		TCGA-DB-A75L	Unaltered	2		TCGA-IB-AAUU	Unaltered	0
TCGA-ZF-A9RE	Unaltered	107		TCGA-22-5471	Unaltered	40		TCGA-BQ-7048	Unaltered	11		TCGA-DU-6400	Unaltered	2		TCGA-US-A776	Unaltered	0
TCGA-DU-6403	Unaltered	107		TCGA-56-7221	Unaltered	40		TCGA-UZ-A9PM	Unaltered	11		TCGA-DU-7006	Unaltered	2		TCGA-US-A77E	Unaltered	0
TCGA-VS-A9UR	Unaltered	107		TCGA-77-8009	Unaltered	40		TCGA-Y8-A8RZ	Unaltered	11		TCGA-DU-7013	Unaltered	2		TCGA-XD-AAUH	Unaltered	0
TCGA-CR-7369	Unaltered	107		TCGA-EJ-5505	Unaltered	40		TCGA-DD-AACW	Unaltered	11		TCGA-DU-A7TD	Unaltered	2		TCGA-XD-AAUL	Unaltered	0
TCGA-B8-A54J	Unaltered	107		TCGA-HC-7210	Unaltered	40		TCGA-DD-AADU	Unaltered	11		TCGA-E1-5304	Unaltered	2		TCGA-PR-A5PF	Unaltered	0
TCGA-GL-A9DD	Unaltered	107		TCGA-HC-A9TH	Unaltered	40		TCGA-DD-AADW	Unaltered	11		TCGA-E1-5305	Unaltered	2		TCGA-QR-A6GY	Unaltered	0
TCGA-DD-A4NR	Unaltered	107		TCGA-VP-A87D	Unaltered	40		TCGA-KR-A7K8	Unaltered	11		TCGA-E1-A7YI	Unaltered	2		TCGA-QR-A6H6	Unaltered	0
TCGA-33-4547	Unaltered	107		TCGA-2G-AAHN	Unaltered	40		TCGA-35-5375	Unaltered	11		TCGA-E1-A7YL	Unaltered	2		TCGA-QR-A70E	Unaltered	0
TCGA-39-5030	Unaltered	107		TCGA-N5-A4RA	Unaltered	40		TCGA-44-6775	Unaltered	11		TCGA-FG-A60L	Unaltered	2		TCGA-QR-A70O	Unaltered	0
TCGA-85-8481	Unaltered	107		TCGA-EY-A1GR	Unaltered	40		TCGA-49-4507	Unaltered	11		TCGA-FG-A87Q	Unaltered	2		TCGA-QR-A70W	Unaltered	0
TCGA-A1-A0SO	Unaltered	106		TCGA-FD-A3SL	Unaltered	39		TCGA-49-6761	Unaltered	11		TCGA-HT-7478	Unaltered	2		TCGA-QT-A5XP	Unaltered	0
TCGA-A8-A09R	Unaltered	106		TCGA-FD-A3SR	Unaltered	39		TCGA-55-7283	Unaltered	11		TCGA-HT-7611	Unaltered	2		TCGA-QT-A69Q	Unaltered	0
TCGA-AG-3591	Unaltered	106		TCGA-GU-A767	Unaltered	39		TCGA-73-4659	Unaltered	11		TCGA-HT-7681	Unaltered	2		TCGA-RT-A6Y9	Unaltered	0
TCGA-A6-2677	Unaltered	106		TCGA-K4-A3WS	Unaltered	39		TCGA-22-4591	Unaltered	11		TCGA-HT-7880	Unaltered	2		TCGA-RT-A6YC	Unaltered	0
TCGA-AA-A02H	Unaltered	106		TCGA-ZF-AA58	Unaltered	39		TCGA-34-2608	Unaltered	11		TCGA-HT-8011	Unaltered	2		TCGA-RW-A67Y	Unaltered	0
TCGA-73-4677	Unaltered	106		TCGA-HT-7467	Unaltered	39		TCGA-56-8201	Unaltered	11		TCGA-HW-7491	Unaltered	2		TCGA-RW-A684	Unaltered	0
TCGA-75-7027	Unaltered	106		TCGA-S9-A6UA	Unaltered	39		TCGA-66-2786	Altered	11		TCGA-P5-A5EX	Unaltered	2		TCGA-SQ-A6I6	Unaltered	0
TCGA-56-7579	Unaltered	106		TCGA-AR-A1AR	Unaltered	39		TCGA-77-8131	Unaltered	11		TCGA-P5-A72W	Unaltered	2		TCGA-TT-A6YJ	Unaltered	0
TCGA-56-A4ZK	Unaltered	106		TCGA-AG-3885	Unaltered	39		TCGA-85-7699	Unaltered	11		TCGA-TQ-A7RR	Unaltered	2		TCGA-W2-A7HB	Unaltered	0
TCGA-60-2698	Unaltered	106		TCGA-CA-6715	Unaltered	39		TCGA-85-8479	Unaltered	11		TCGA-VM-A8CB	Unaltered	2		TCGA-WB-A80M	Unaltered	0
TCGA-77-8136	Altered	106		TCGA-CR-6480	Altered	39		TCGA-85-8582	Unaltered	11		TCGA-VV-A829	Unaltered	2		TCGA-WB-A817	Unaltered	0
TCGA-ER-A42H	Unaltered	106		TCGA-CR-7372	Unaltered	39		TCGA-85-A512	Altered	11		TCGA-VV-A86M	Unaltered	2		TCGA-WB-A818	Unaltered	0
TCGA-D1-A17Q	Altered	106		TCGA-CR-7389	Unaltered	39		TCGA-94-A5I4	Unaltered	11		TCGA-A1-A0SK	Unaltered	2		TCGA-WB-A81M	Unaltered	0
TCGA-4Z-AA7R	Altered	105		TCGA-KL-8334	Unaltered	39		TCGA-IB-AAUN	Unaltered	11		TCGA-A2-A04W	Unaltered	2		TCGA-WB-A81W	Unaltered	0
TCGA-UY-A9PA	Unaltered	105		TCGA-A3-3349	Unaltered	39		TCGA-2A-AAYO	Unaltered	11		TCGA-A2-A0D4	Unaltered	2		TCGA-CH-5741	Unaltered	0
TCGA-QH-A65Z	Unaltered	105		TCGA-B0-4823	Unaltered	39		TCGA-HC-7231	Unaltered	11		TCGA-A2-A0SV	Unaltered	2		TCGA-CH-5765	Unaltered	0
TCGA-A2-A0SY	Unaltered	105		TCGA-BP-4963	Altered	39		TCGA-XK-AAJR	Unaltered	11		TCGA-A2-A0YC	Unaltered	2		TCGA-CH-5766	Unaltered	0
TCGA-AC-A23H	Altered	105		TCGA-BP-5200	Unaltered	39		TCGA-YL-A8HM	Unaltered	11		TCGA-A2-A1FZ	Altered	2		TCGA-EJ-5542	Unaltered	0
TCGA-LL-A740	Unaltered	105		TCGA-CC-A3MB	Unaltered	39		TCGA-DX-A48P	Unaltered	11		TCGA-A2-A3XZ	Unaltered	2		TCGA-EJ-7315	Unaltered	0
TCGA-VS-A9V3	Unaltered	105		TCGA-WQ-AB4B	Unaltered	39		TCGA-X6-A7WB	Altered	11		TCGA-A7-A0CD	Unaltered	2		TCGA-EJ-7318	Unaltered	0
TCGA-DY-A1DD	Unaltered	105		TCGA-44-2657	Unaltered	39		TCGA-EB-A6QZ	Unaltered	11		TCGA-A7-A0CH	Unaltered	2		TCGA-EJ-7328	Unaltered	0
TCGA-BA-A6DJ	Unaltered	105		TCGA-49-6742	Unaltered	39		TCGA-SB-A6J6	Unaltered	11		TCGA-A8-A07O	Unaltered	2		TCGA-EJ-7331	Unaltered	0
TCGA-DQ-5629	Unaltered	105		TCGA-62-A470	Unaltered	39		TCGA-4X-A9FC	Unaltered	11		TCGA-A8-A092	Unaltered	2		TCGA-EJ-7794	Unaltered	0
TCGA-95-7567	Unaltered	105		TCGA-69-7764	Unaltered	39		TCGA-4C-A93U	Unaltered	11		TCGA-A8-A09B	Unaltered	2		TCGA-EJ-8469	Unaltered	0
TCGA-18-3412	Unaltered	105		TCGA-SP-A6QJ	Unaltered	39		TCGA-BJ-A28S	Unaltered	11		TCGA-A8-A09Q	Unaltered	2		TCGA-EJ-8470	Unaltered	0
TCGA-43-3920	Unaltered	105		TCGA-V1-A9ZR	Unaltered	39		TCGA-DJ-A2PP	Unaltered	11		TCGA-AC-A2FG	Unaltered	2		TCGA-EJ-8472	Unaltered	0
TCGA-58-A46M	Unaltered	105		TCGA-3B-A9HY	Unaltered	39		TCGA-EL-A3CR	Unaltered	11		TCGA-AC-A3QQ	Unaltered	2		TCGA-EJ-A46G	Unaltered	0
TCGA-94-8035	Unaltered	105		TCGA-DX-AB2T	Unaltered	39		TCGA-D1-A15Z	Unaltered	11		TCGA-AC-A6IW	Unaltered	2		TCGA-EJ-A65J	Unaltered	0
TCGA-IB-7652	Unaltered	105		TCGA-EB-A41A	Unaltered	39		TCGA-OR-A5JL	Unaltered	10		TCGA-AN-A03X	Unaltered	2		TCGA-EJ-A7NF	Unaltered	0
TCGA-BG-A2AE	Unaltered	105		TCGA-ET-A39J	Unaltered	39		TCGA-OR-A5KX	Unaltered	10		TCGA-AN-A0FZ	Unaltered	2		TCGA-EJ-AB20	Unaltered	0
TCGA-BT-A3PJ	Unaltered	104		TCGA-OR-A5JI	Unaltered	38		TCGA-G2-A3IB	Unaltered	10		TCGA-AO-A0JI	Unaltered	2		TCGA-FC-A5OB	Unaltered	0
TCGA-A8-A06X	Unaltered	104		TCGA-2F-A9KW	Unaltered	38		TCGA-GV-A3JW	Unaltered	10		TCGA-AR-A0TQ	Unaltered	2		TCGA-G9-6333	Unaltered	0
TCGA-5P-A9KC	Unaltered	104		TCGA-DK-A3WW	Unaltered	38		TCGA-K4-A4AB	Unaltered	10		TCGA-AR-A0TR	Unaltered	2		TCGA-G9-6356	Unaltered	0
TCGA-B1-7332	Unaltered	104		TCGA-GD-A2C5	Unaltered	38		TCGA-KQ-A41P	Unaltered	10		TCGA-AR-A0TW	Unaltered	2		TCGA-G9-6363	Unaltered	0
TCGA-44-3398	Unaltered	104		TCGA-DH-A7UV	Unaltered	38		TCGA-KQ-A41Q	Unaltered	10		TCGA-AR-A0TX	Altered	2		TCGA-G9-6369	Unaltered	0
TCGA-55-7727	Unaltered	104		TCGA-DU-7010	Unaltered	38		TCGA-UY-A9PH	Unaltered	10		TCGA-AR-A0TY	Unaltered	2		TCGA-G9-6377	Unaltered	0
TCGA-95-8039	Unaltered	104		TCGA-HT-7855	Unaltered	38		TCGA-XF-A9T8	Altered	10		TCGA-AR-A1AW	Unaltered	2		TCGA-G9-6378	Unaltered	0
TCGA-51-4081	Unaltered	104		TCGA-A2-A04V	Unaltered	38		TCGA-QH-A6XC	Unaltered	10		TCGA-AR-A24P	Unaltered	2		TCGA-G9-7510	Unaltered	0
TCGA-77-A5G3	Unaltered	104		TCGA-A2-A0YM	Unaltered	38		TCGA-S9-A7J0	Unaltered	10		TCGA-AR-A24S	Unaltered	2		TCGA-G9-7522	Unaltered	0
TCGA-HC-A8D0	Unaltered	104		TCGA-B6-A0RU	Unaltered	38		TCGA-A1-A0SH	Unaltered	10		TCGA-AR-A2LN	Unaltered	2		TCGA-HC-7075	Unaltered	0
TCGA-FD-A5C0	Altered	103		TCGA-D8-A1JC	Unaltered	38		TCGA-A2-A04T	Unaltered	10		TCGA-B6-A0IG	Unaltered	2		TCGA-HC-7209	Unaltered	0
TCGA-DB-A64V	Unaltered	103		TCGA-D8-A1JS	Unaltered	38		TCGA-A2-A0CM	Unaltered	10		TCGA-B6-A0IP	Unaltered	2		TCGA-HC-7213	Unaltered	0
TCGA-AA-A01C	Unaltered	103		TCGA-E2-A1L8	Unaltered	38		TCGA-A2-A4S1	Unaltered	10		TCGA-B6-A0RI	Unaltered	2		TCGA-HC-7233	Unaltered	0
TCGA-CV-7432	Unaltered	103		TCGA-CK-5912	Unaltered	38		TCGA-A8-A09W	Unaltered	10		TCGA-B6-A0WY	Unaltered	2		TCGA-HC-7736	Unaltered	0
TCGA-B2-4102	Unaltered	103		TCGA-19-0957	Unaltered	38		TCGA-AR-A24Q	Unaltered	10		TCGA-BH-A0AV	Unaltered	2		TCGA-HC-7747	Unaltered	0
TCGA-BQ-7062	Unaltered	103		TCGA-CV-5442	Unaltered	38		TCGA-B6-A1KN	Unaltered	10		TCGA-BH-A0DI	Unaltered	2		TCGA-HC-7752	Unaltered	0
TCGA-56-7730	Unaltered	103		TCGA-IQ-7632	Unaltered	38		TCGA-B6-A2IU	Unaltered	10		TCGA-BH-A0EB	Unaltered	2		TCGA-HC-7817	Unaltered	0
TCGA-77-6844	Unaltered	103		TCGA-KU-A66T	Unaltered	38		TCGA-BH-A0B9	Unaltered	10		TCGA-BH-A0GY	Unaltered	2		TCGA-HC-7818	Altered	0
TCGA-NK-A5CX	Unaltered	103		TCGA-BP-5174	Unaltered	38		TCGA-BH-A0E7	Unaltered	10		TCGA-BH-A1EO	Unaltered	2		TCGA-HC-8216	Unaltered	0
TCGA-3H-AB3S	Altered	103		TCGA-BP-5184	Unaltered	38		TCGA-BH-A1FC	Unaltered	10		TCGA-BH-A1F0	Unaltered	2		TCGA-HC-A48F	Unaltered	0
TCGA-EB-A4XL	Unaltered	103		TCGA-2Y-A9GZ	Unaltered	38		TCGA-BH-A208	Unaltered	10		TCGA-BH-A1FM	Unaltered	2		TCGA-HC-A9TE	Unaltered	0
TCGA-D1-A3DG	Unaltered	103		TCGA-55-6543	Unaltered	38		TCGA-E2-A1IK	Altered	10		TCGA-BH-A6R8	Unaltered	2		TCGA-J4-8200	Unaltered	0
TCGA-DK-A3IT	Unaltered	102		TCGA-78-7153	Unaltered	38		TCGA-E9-A1R6	Unaltered	10		TCGA-C8-A12M	Unaltered	2		TCGA-J4-A67Q	Unaltered	0
TCGA-BH-A18T	Unaltered	102		TCGA-78-7167	Unaltered	38		TCGA-GM-A4E0	Unaltered	10		TCGA-C8-A1HF	Unaltered	2		TCGA-J4-A83I	Unaltered	0
TCGA-BH-A5IZ	Unaltered	102		TCGA-J4-A67K	Unaltered	38		TCGA-LL-A73Z	Unaltered	10		TCGA-C8-A1HO	Unaltered	2		TCGA-J4-A83K	Unaltered	0
TCGA-BA-A6DA	Unaltered	102		TCGA-AJ-A3EJ	Unaltered	38		TCGA-FU-A5XV	Unaltered	10		TCGA-C8-A278	Unaltered	2		TCGA-J4-A83L	Unaltered	0
TCGA-CV-A6JD	Unaltered	102		TCGA-DU-6395	Unaltered	37		TCGA-JX-A3Q8	Unaltered	10		TCGA-D8-A27R	Unaltered	2		TCGA-J4-A83N	Unaltered	0
TCGA-RS-A6TP	Unaltered	102		TCGA-E1-5322	Altered	37		TCGA-MA-AA3X	Unaltered	10		TCGA-E2-A1L6	Unaltered	2		TCGA-J9-A52B	Unaltered	0
TCGA-A3-3308	Altered	102		TCGA-S9-A7J2	Unaltered	37		TCGA-MA-AA41	Unaltered	10		TCGA-E2-A9RU	Unaltered	2		TCGA-J9-A8CK	Unaltered	0
TCGA-B0-5812	Unaltered	102		TCGA-A7-A6VY	Unaltered	37		TCGA-EI-6514	Unaltered	10		TCGA-E9-A22H	Unaltered	2		TCGA-KK-A6E3	Unaltered	0
TCGA-2Z-A9JQ	Unaltered	102		TCGA-B6-A0IB	Unaltered	37		TCGA-F5-6812	Unaltered	10		TCGA-EW-A1PA	Unaltered	2		TCGA-KK-A6E6	Unaltered	0
TCGA-MH-A854	Unaltered	102		TCGA-C8-A135	Unaltered	37		TCGA-A6-5667	Unaltered	10		TCGA-EW-A1PD	Unaltered	2		TCGA-KK-A7B0	Unaltered	0
TCGA-G3-A25S	Unaltered	102		TCGA-C8-A26Z	Unaltered	37		TCGA-AA-3506	Unaltered	10		TCGA-OK-A5Q2	Unaltered	2		TCGA-KK-A7B3	Unaltered	0
TCGA-46-3765	Unaltered	102		TCGA-C5-A1M6	Unaltered	37		TCGA-AA-3679	Unaltered	10		TCGA-OL-A66J	Unaltered	2		TCGA-KK-A8I5	Unaltered	0
TCGA-2G-AAKD	Unaltered	102		TCGA-EA-A78R	Unaltered	37		TCGA-AA-3846	Unaltered	10		TCGA-OL-A66K	Unaltered	2		TCGA-KK-A8IK	Unaltered	0
TCGA-FD-A6TD	Unaltered	101		TCGA-A6-5662	Unaltered	37		TCGA-AA-3984	Altered	10		TCGA-BI-A0VS	Unaltered	2		TCGA-KK-A8IM	Unaltered	0
TCGA-E2-A10A	Unaltered	101		TCGA-A6-6142	Unaltered	37		TCGA-AD-6548	Altered	10		TCGA-C5-A2LV	Unaltered	2		TCGA-M7-A71Y	Unaltered	0
TCGA-AG-3894	Unaltered	101		TCGA-27-2521	Unaltered	37		TCGA-CK-5915	Unaltered	10		TCGA-C5-A2LX	Unaltered	2		TCGA-V1-A8ML	Unaltered	0
TCGA-DM-A28A	Unaltered	101		TCGA-CV-5436	Unaltered	37		TCGA-DM-A28C	Unaltered	10		TCGA-EA-A5FO	Unaltered	2		TCGA-V1-A9O9	Unaltered	0
TCGA-CQ-5329	Unaltered	101		TCGA-CV-6954	Unaltered	37		TCGA-G4-6293	Unaltered	10		TCGA-EA-A5ZE	Unaltered	2		TCGA-V1-A9OA	Unaltered	0
TCGA-BP-4972	Unaltered	101		TCGA-D6-A4Z9	Unaltered	37		TCGA-28-2514	Unaltered	10		TCGA-EK-A2R7	Unaltered	2		TCGA-V1-A9OY	Unaltered	0
TCGA-62-8394	Unaltered	101		TCGA-KL-8335	Unaltered	37		TCGA-CN-A49C	Unaltered	10		TCGA-EK-A2RJ	Unaltered	2		TCGA-V1-A9ZG	Unaltered	0
TCGA-97-8179	Unaltered	101		TCGA-A3-A6NI	Unaltered	37		TCGA-CV-7243	Unaltered	10		TCGA-FU-A3TQ	Unaltered	2		TCGA-VN-A88I	Unaltered	0
TCGA-33-4586	Unaltered	101		TCGA-CJ-4901	Altered	37		TCGA-CV-7433	Unaltered	10		TCGA-LP-A4AU	Unaltered	2		TCGA-VN-A88N	Unaltered	0
TCGA-FB-AAPU	Unaltered	101		TCGA-CC-A3MC	Unaltered	37		TCGA-CV-7568	Altered	10		TCGA-RA-A741	Unaltered	2		TCGA-VN-A88O	Unaltered	0
TCGA-SN-A6IS	Unaltered	101		TCGA-78-7156	Unaltered	37		TCGA-QK-A6IF	Unaltered	10		TCGA-VS-A8QA	Unaltered	2		TCGA-VP-A875	Unaltered	0
TCGA-BH-A0BW	Unaltered	100		TCGA-86-7701	Unaltered	37		TCGA-QK-A8Z9	Unaltered	10		TCGA-VS-A957	Unaltered	2		TCGA-X4-A8KS	Unaltered	0
TCGA-VS-A8EJ	Unaltered	100		TCGA-22-5492	Unaltered	37		TCGA-T3-A92M	Unaltered	10		TCGA-VS-A959	Unaltered	2		TCGA-XQ-A8TA	Unaltered	0
TCGA-VS-A9UD	Unaltered	100		TCGA-63-6202	Unaltered	37		TCGA-A3-3380	Unaltered	10		TCGA-VS-A9UH	Unaltered	2		TCGA-Y6-A9XI	Unaltered	0
TCGA-DM-A0X9	Unaltered	100		TCGA-63-A5MY	Unaltered	37		TCGA-B2-5633	Unaltered	10		TCGA-VS-A9UL	Unaltered	2		TCGA-YL-A8HK	Unaltered	0
TCGA-06-2570	Unaltered	100		TCGA-85-8071	Unaltered	37		TCGA-B8-5549	Unaltered	10		TCGA-VS-A9UT	Unaltered	2		TCGA-YL-A8SI	Unaltered	0
TCGA-14-0817	Unaltered	100		TCGA-EJ-7793	Unaltered	37		TCGA-BP-4994	Unaltered	10		TCGA-VS-A9UU	Unaltered	2		TCGA-YL-A8SJ	Unaltered	0
TCGA-CJ-4637	Unaltered	100		TCGA-V1-A9ZI	Unaltered	37		TCGA-BP-5196	Unaltered	10		TCGA-ZJ-AAXU	Unaltered	2		TCGA-YL-A9WJ	Unaltered	0
TCGA-CZ-5985	Unaltered	100		TCGA-VP-AA1N	Unaltered	37		TCGA-CW-5585	Unaltered	10		TCGA-W5-AA30	Unaltered	2		TCGA-YL-A9WK	Unaltered	0
TCGA-V9-A7HT	Unaltered	100		TCGA-ZG-A9L1	Unaltered	37		TCGA-5P-A9KA	Unaltered	10		TCGA-AF-A56K	Unaltered	2		TCGA-ZG-A8QW	Unaltered	0
TCGA-68-7755	Unaltered	100		TCGA-ZG-A9LN	Unaltered	37		TCGA-2Y-A9HA	Unaltered	10		TCGA-AG-3892	Altered	2		TCGA-ZG-A9LB	Unaltered	0
TCGA-3U-A98F	Unaltered	100		TCGA-ET-A2N5	Unaltered	37		TCGA-5R-AA1C	Unaltered	10		TCGA-AG-A016	Unaltered	2		TCGA-ZG-A9LY	Unaltered	0
TCGA-F2-6879	Unaltered	100		TCGA-DF-A2KV	Altered	37		TCGA-BC-A217	Unaltered	10		TCGA-AG-A032	Unaltered	2		TCGA-ZG-A9MC	Unaltered	0
TCGA-HW-8320	Unaltered	99		TCGA-5N-A9KI	Unaltered	36		TCGA-CC-A7IG	Altered	10		TCGA-AH-6903	Unaltered	2		TCGA-3B-A9HO	Unaltered	0
TCGA-A2-A0SU	Unaltered	99		TCGA-DK-A3WX	Unaltered	36		TCGA-DD-A39W	Unaltered	10		TCGA-DC-6157	Unaltered	2		TCGA-3B-A9HP	Unaltered	0
TCGA-CV-6962	Unaltered	99		TCGA-GC-A3YS	Unaltered	36		TCGA-UB-A7ME	Unaltered	10		TCGA-DY-A1DG	Unaltered	2		TCGA-3B-A9HS	Unaltered	0
TCGA-B0-5104	Unaltered	99		TCGA-GV-A40G	Unaltered	36		TCGA-44-2655	Unaltered	10		TCGA-F5-6810	Unaltered	2		TCGA-3B-A9HZ	Unaltered	0
TCGA-DW-7841	Unaltered	99		TCGA-PQ-A6FI	Unaltered	36		TCGA-55-6979	Unaltered	10		TCGA-AA-3681	Unaltered	2		TCGA-3R-A8YX	Unaltered	0
TCGA-DD-A1ED	Unaltered	99		TCGA-DU-7011	Unaltered	36		TCGA-91-6830	Unaltered	10		TCGA-AA-3696	Unaltered	2		TCGA-DX-A1KW	Unaltered	0
TCGA-DD-AAW3	Unaltered	99		TCGA-HW-A5KK	Unaltered	36		TCGA-J2-8194	Unaltered	10		TCGA-AA-3844	Unaltered	2		TCGA-DX-A1L2	Unaltered	0
TCGA-44-8119	Unaltered	99		TCGA-P5-A735	Unaltered	36		TCGA-58-8388	Unaltered	10		TCGA-AA-A01S	Unaltered	2		TCGA-DX-A240	Unaltered	0
TCGA-22-4593	Unaltered	99		TCGA-QH-A6CX	Unaltered	36		TCGA-60-2716	Unaltered	10		TCGA-CA-5255	Unaltered	2		TCGA-DX-A3M2	Unaltered	0
TCGA-56-8624	Unaltered	99		TCGA-TM-A84H	Unaltered	36		TCGA-63-7020	Unaltered	10		TCGA-CM-4751	Unaltered	2		TCGA-DX-A3U9	Unaltered	0
TCGA-NC-A5HI	Unaltered	99		TCGA-A8-A07C	Unaltered	36		TCGA-94-A5I6	Unaltered	10		TCGA-CM-5862	Unaltered	2		TCGA-DX-A3UC	Unaltered	0
TCGA-CH-5769	Unaltered	99		TCGA-AN-A049	Unaltered	36		TCGA-TS-A7P6	Unaltered	10		TCGA-D5-7000	Unaltered	2		TCGA-DX-A3UD	Unaltered	0
TCGA-J4-8198	Unaltered	99		TCGA-C8-A12P	Altered	36		TCGA-IB-8127	Unaltered	10		TCGA-DM-A1D7	Unaltered	2		TCGA-DX-A3UF	Unaltered	0
TCGA-D1-A17K	Unaltered	99		TCGA-C8-A1HE	Unaltered	36		TCGA-CH-5752	Unaltered	10		TCGA-G4-6323	Unaltered	2		TCGA-DX-A48K	Unaltered	0
TCGA-S5-A6DX	Unaltered	98		TCGA-E2-A15L	Unaltered	36		TCGA-EJ-A46F	Unaltered	10		TCGA-NH-A50T	Unaltered	2		TCGA-DX-A6YQ	Unaltered	0
TCGA-XF-AAMJ	Unaltered	98		TCGA-FU-A40J	Unaltered	36		TCGA-HC-7748	Unaltered	10		TCGA-GS-A9TX	Unaltered	2		TCGA-DX-A7EL	Unaltered	0
TCGA-AN-A0FV	Unaltered	98		TCGA-IR-A3LC	Unaltered	36		TCGA-DX-A6BA	Unaltered	10		TCGA-RQ-A6JB	Altered	2		TCGA-DX-A7ER	Unaltered	0
TCGA-AN-A0XL	Unaltered	98		TCGA-AG-4021	Unaltered	36		TCGA-K1-A6RV	Unaltered	10		TCGA-02-2485	Unaltered	2		TCGA-DX-A8BK	Unaltered	0
TCGA-E9-A1R4	Unaltered	98		TCGA-EI-6917	Altered	36		TCGA-QQ-A5VD	Unaltered	10		TCGA-06-2569	Unaltered	2		TCGA-DX-A8BL	Unaltered	0
TCGA-OL-A97C	Unaltered	98		TCGA-CV-A6JU	Unaltered	36		TCGA-ZB-A965	Unaltered	10		TCGA-06-5413	Unaltered	2		TCGA-DX-A8BM	Unaltered	0
TCGA-CV-6441	Unaltered	98		TCGA-A3-3331	Unaltered	36		TCGA-EM-A22J	Unaltered	10		TCGA-06-5859	Unaltered	2		TCGA-DX-A8BP	Unaltered	0
TCGA-B0-5094	Unaltered	98		TCGA-A3-A6NJ	Unaltered	36		TCGA-N5-A4RS	Unaltered	10		TCGA-12-3653	Unaltered	2		TCGA-DX-AB37	Unaltered	0
TCGA-A4-7732	Unaltered	98		TCGA-B0-5696	Altered	36		TCGA-A5-A0R7	Unaltered	10		TCGA-32-2634	Unaltered	2		TCGA-FX-A3NJ	Unaltered	0
TCGA-CC-A7IE	Altered	98		TCGA-B8-A54I	Unaltered	36		TCGA-AJ-A3BI	Unaltered	10		TCGA-76-4925	Unaltered	2		TCGA-HB-A5W3	Unaltered	0
TCGA-DJ-A3UN	Unaltered	98		TCGA-BP-5010	Altered	36		TCGA-BG-A0MC	Unaltered	10		TCGA-12-0616	Unaltered	2		TCGA-IS-A3K7	Unaltered	0
TCGA-EL-A3GO	Unaltered	98		TCGA-CW-6087	Unaltered	36		TCGA-BS-A0U5	Unaltered	10		TCGA-BA-5556	Unaltered	2		TCGA-IS-A3KA	Unaltered	0
TCGA-D8-A1JD	Unaltered	97		TCGA-5P-A9JZ	Unaltered	36		TCGA-D1-A15W	Unaltered	10		TCGA-CN-6989	Unaltered	2		TCGA-IW-A3M4	Unaltered	0
TCGA-C5-A7UH	Unaltered	97		TCGA-5P-A9K3	Altered	36		TCGA-EO-A3KW	Unaltered	10		TCGA-CR-6478	Unaltered	2		TCGA-IW-A3M6	Unaltered	0
TCGA-DD-A118	Unaltered	97		TCGA-DD-AAVV	Unaltered	36		TCGA-QS-A8F1	Unaltered	10		TCGA-CV-5976	Unaltered	2		TCGA-JV-A75J	Unaltered	0
TCGA-DD-A11C	Unaltered	97		TCGA-ED-A7XO	Unaltered	36		TCGA-V4-A9F0	Unaltered	10		TCGA-CV-6961	Unaltered	2		TCGA-K1-A6RT	Unaltered	0
TCGA-55-6968	Unaltered	97		TCGA-55-7726	Unaltered	36		TCGA-VD-A8KD	Unaltered	10		TCGA-CV-7178	Unaltered	2		TCGA-MB-A8JL	Unaltered	0
TCGA-55-8094	Unaltered	97		TCGA-62-A46Y	Unaltered	36		TCGA-E7-A3X6	Unaltered	9		TCGA-CV-7413	Unaltered	2		TCGA-MJ-A850	Unaltered	0
TCGA-97-8172	Unaltered	97		TCGA-86-7955	Unaltered	36		TCGA-FD-A43Y	Unaltered	9		TCGA-HD-7754	Unaltered	2		TCGA-MO-A47R	Unaltered	0
TCGA-63-A5MW	Unaltered	97		TCGA-97-7554	Unaltered	36		TCGA-FJ-A3Z9	Unaltered	9		TCGA-HD-7831	Unaltered	2		TCGA-PC-A5DK	Unaltered	0
TCGA-66-2758	Unaltered	97		TCGA-18-3421	Unaltered	36		TCGA-HQ-A5ND	Unaltered	9		TCGA-IQ-A61J	Unaltered	2		TCGA-QQ-A5VC	Unaltered	0
TCGA-HC-A4ZV	Unaltered	97		TCGA-22-4594	Unaltered	36		TCGA-XF-A8HH	Unaltered	9		TCGA-P3-A5QA	Unaltered	2		TCGA-RN-A68Q	Unaltered	0
TCGA-AJ-A5DV	Unaltered	97		TCGA-66-2766	Unaltered	36		TCGA-DH-A66D	Unaltered	9		TCGA-QK-A64Z	Unaltered	2		TCGA-SI-A71P	Unaltered	0
TCGA-P5-A77W	Unaltered	96		TCGA-68-8251	Unaltered	36		TCGA-DU-8167	Unaltered	9		TCGA-QK-A6IG	Unaltered	2		TCGA-SI-AA8C	Unaltered	0
TCGA-AO-A03U	Unaltered	96		TCGA-NC-A5HQ	Unaltered	36		TCGA-DU-A5TW	Unaltered	9		TCGA-UF-A7JA	Unaltered	2		TCGA-WK-A8XO	Unaltered	0
TCGA-AO-A0J9	Unaltered	96		TCGA-O2-A52V	Unaltered	36		TCGA-FG-A4MW	Unaltered	9		TCGA-UF-A7JD	Unaltered	2		TCGA-X6-A7WD	Unaltered	0
TCGA-Q1-A6DV	Unaltered	96		TCGA-FB-A7DR	Unaltered	36		TCGA-HT-A5RC	Unaltered	9		TCGA-UP-A6WW	Unaltered	2		TCGA-X6-A8C5	Unaltered	0
TCGA-CR-7390	Unaltered	96		TCGA-EJ-5521	Unaltered	36		TCGA-HT-A74K	Unaltered	9		TCGA-KL-8326	Unaltered	2		TCGA-X6-A8C7	Unaltered	0
TCGA-B0-4827	Unaltered	96		TCGA-IH-A3EA	Unaltered	36		TCGA-HT-A74O	Unaltered	9		TCGA-KM-8441	Unaltered	2		TCGA-X9-A973	Unaltered	0
TCGA-B8-4153	Unaltered	96		TCGA-2G-AAF4	Unaltered	36		TCGA-QH-A65V	Unaltered	9		TCGA-KN-8418	Unaltered	2		TCGA-BF-A1PV	Unaltered	0
TCGA-BQ-7051	Unaltered	96		TCGA-BJ-A0Z0	Unaltered	36		TCGA-QH-A6CS	Unaltered	9		TCGA-KN-8427	Unaltered	2		TCGA-BF-A3DN	Unaltered	0
TCGA-BQ-7060	Unaltered	96		TCGA-N6-A4VC	Unaltered	36		TCGA-TM-A84F	Unaltered	9		TCGA-KO-8410	Unaltered	2		TCGA-BF-A5EP	Unaltered	0
TCGA-DD-AACG	Altered	96		TCGA-D1-A3DA	Unaltered	36		TCGA-A2-A0CW	Unaltered	9		TCGA-AK-3453	Unaltered	2		TCGA-D9-A4Z5	Unaltered	0
TCGA-LG-A9QD	Unaltered	96		TCGA-EY-A2ON	Unaltered	36		TCGA-A2-A0CZ	Unaltered	9		TCGA-B0-5707	Unaltered	2		TCGA-EB-A24C	Unaltered	0
TCGA-44-7661	Unaltered	96		TCGA-4Z-AA7O	Unaltered	35		TCGA-A2-A3XX	Unaltered	9		TCGA-B8-5165	Unaltered	2		TCGA-EB-A430	Unaltered	0
TCGA-69-A59K	Unaltered	96		TCGA-DK-AA75	Unaltered	35		TCGA-A7-A0CE	Unaltered	9		TCGA-BP-4760	Unaltered	2		TCGA-EB-A44O	Altered	0
TCGA-21-5787	Unaltered	96		TCGA-CS-4942	Unaltered	35		TCGA-A7-A26J	Unaltered	9		TCGA-BP-4973	Unaltered	2		TCGA-EB-A44P	Unaltered	0
TCGA-85-7698	Unaltered	96		TCGA-P5-A5F4	Unaltered	35		TCGA-A8-A06N	Unaltered	9		TCGA-CZ-5469	Unaltered	2		TCGA-EB-A553	Unaltered	0
TCGA-3B-A9HX	Unaltered	96		TCGA-A8-A07W	Unaltered	35		TCGA-A8-A06U	Unaltered	9		TCGA-A4-A4ZT	Unaltered	2		TCGA-FW-A5DX	Unaltered	0
TCGA-DK-A2I6	Altered	95		TCGA-AC-A62Y	Unaltered	35		TCGA-AO-A03R	Unaltered	9		TCGA-AT-A5NU	Unaltered	2		TCGA-GF-A769	Unaltered	0
TCGA-YF-AA3M	Unaltered	95		TCGA-LL-A5YM	Unaltered	35		TCGA-AQ-A1H2	Unaltered	9		TCGA-BQ-7061	Altered	2		TCGA-2G-AAEW	Unaltered	0
TCGA-DU-7298	Unaltered	95		TCGA-EA-A5ZF	Unaltered	35		TCGA-AQ-A1H3	Unaltered	9		TCGA-DW-7837	Unaltered	2		TCGA-2G-AAFH	Unaltered	0
TCGA-AO-A129	Unaltered	95		TCGA-MY-A913	Unaltered	35		TCGA-AR-A24T	Unaltered	9		TCGA-G7-A4TM	Unaltered	2		TCGA-2G-AAFJ	Unaltered	0
TCGA-A6-6648	Unaltered	95		TCGA-ZJ-A8QO	Unaltered	35		TCGA-AR-A24X	Unaltered	9		TCGA-UZ-A9PJ	Unaltered	2		TCGA-2G-AAFM	Unaltered	0
TCGA-FF-8047	Unaltered	95		TCGA-W5-AA2X	Unaltered	35		TCGA-B6-A0RT	Unaltered	9		TCGA-5C-A9VG	Unaltered	2		TCGA-2G-AAG6	Unaltered	0
TCGA-CV-7089	Unaltered	95		TCGA-CM-5348	Unaltered	35		TCGA-BH-A0AY	Unaltered	9		TCGA-DD-A39V	Unaltered	2		TCGA-2G-AAGE	Unaltered	0
TCGA-B0-5106	Unaltered	95		TCGA-FF-8061	Unaltered	35		TCGA-BH-A0BP	Unaltered	9		TCGA-DD-A73G	Unaltered	2		TCGA-2G-AAGF	Unaltered	0
TCGA-CC-A8HT	Unaltered	95		TCGA-BB-A5HZ	Unaltered	35		TCGA-BH-A0HK	Unaltered	9		TCGA-DD-AACS	Unaltered	2		TCGA-2G-AAGK	Unaltered	0
TCGA-44-6144	Unaltered	95		TCGA-CR-7368	Unaltered	35		TCGA-BH-A0W3	Unaltered	9		TCGA-DD-AAD2	Unaltered	2		TCGA-2G-AAGP	Unaltered	0
TCGA-NC-A5HK	Unaltered	95		TCGA-CV-A464	Unaltered	35		TCGA-D8-A145	Unaltered	9		TCGA-G3-A25U	Unaltered	2		TCGA-2G-AAGZ	Unaltered	0
TCGA-HZ-A8P1	Unaltered	95		TCGA-CV-A6JO	Unaltered	35		TCGA-D8-A1XC	Unaltered	9		TCGA-G3-AAV2	Unaltered	2		TCGA-2G-AAHT	Unaltered	0
TCGA-EJ-7321	Unaltered	95		TCGA-B0-4811	Altered	35		TCGA-E2-A159	Unaltered	9		TCGA-G3-AAV4	Unaltered	2		TCGA-2G-AALP	Unaltered	0
TCGA-XF-A9SP	Unaltered	94		TCGA-BQ-7046	Unaltered	35		TCGA-E2-A1IG	Unaltered	9		TCGA-K7-A6G5	Altered	2		TCGA-4K-AAAL	Unaltered	0
TCGA-NH-A6GC	Unaltered	94		TCGA-DD-AAD1	Unaltered	35		TCGA-E9-A1R2	Unaltered	9		TCGA-ZP-A9CY	Unaltered	2		TCGA-S6-A8JW	Unaltered	0
TCGA-BP-4971	Unaltered	94		TCGA-RG-A7D4	Unaltered	35		TCGA-E9-A1R3	Unaltered	9		TCGA-44-5643	Unaltered	2		TCGA-SB-A76C	Unaltered	0
TCGA-CZ-5455	Unaltered	94		TCGA-49-4486	Unaltered	35		TCGA-EW-A6S9	Unaltered	9		TCGA-44-6146	Unaltered	2		TCGA-SN-A84W	Unaltered	0
TCGA-EP-A12J	Unaltered	94		TCGA-18-3417	Unaltered	35		TCGA-VS-A8EC	Unaltered	9		TCGA-44-A47B	Unaltered	2		TCGA-SN-A84X	Unaltered	0
TCGA-55-6970	Unaltered	94		TCGA-18-4721	Unaltered	35		TCGA-VS-A9UB	Unaltered	9		TCGA-49-4510	Unaltered	2		TCGA-SO-A8JP	Unaltered	0
TCGA-95-A4VN	Unaltered	94		TCGA-77-8139	Unaltered	35		TCGA-AA-3875	Unaltered	9		TCGA-55-8512	Unaltered	2		TCGA-VF-A8AB	Unaltered	0
TCGA-MP-A4TA	Unaltered	94		TCGA-85-6798	Unaltered	35		TCGA-CM-6678	Unaltered	9		TCGA-55-A48Z	Unaltered	2		TCGA-WZ-A7V5	Unaltered	0
TCGA-56-6545	Unaltered	94		TCGA-MQ-A6BR	Unaltered	35		TCGA-D5-6529	Unaltered	9		TCGA-62-8397	Unaltered	2		TCGA-XE-AANV	Unaltered	0
TCGA-85-6560	Unaltered	94		TCGA-2J-AABT	Unaltered	35		TCGA-D5-6531	Unaltered	9		TCGA-64-1681	Unaltered	2		TCGA-XE-AAO6	Unaltered	0
TCGA-85-7697	Unaltered	94		TCGA-FB-A5VM	Unaltered	35		TCGA-D5-6926	Unaltered	9		TCGA-67-6215	Unaltered	2		TCGA-YU-A90Y	Unaltered	0
TCGA-ZG-A9ND	Unaltered	94		TCGA-QR-A6GT	Unaltered	35		TCGA-G4-6311	Unaltered	9		TCGA-95-7948	Unaltered	2		TCGA-ZM-AA06	Unaltered	0
TCGA-QC-A6FX	Unaltered	94		TCGA-KK-A6E0	Unaltered	35		TCGA-QG-A5YW	Unaltered	9		TCGA-97-8552	Unaltered	2		TCGA-ZM-AA0F	Unaltered	0
TCGA-AX-A2IO	Unaltered	94		TCGA-DX-AB2H	Unaltered	35		TCGA-12-0821	Unaltered	9		TCGA-97-A4M6	Altered	2		TCGA-2G-AALQ	Unaltered	0
TCGA-B5-A1MR	Altered	94		TCGA-N9-A4Q4	Unaltered	35		TCGA-BA-5153	Unaltered	9		TCGA-MP-A4T9	Unaltered	2		TCGA-2G-AALZ	Unaltered	0
TCGA-XF-A9SJ	Unaltered	93		TCGA-HT-7604	Unaltered	34		TCGA-C9-A47Z	Unaltered	9		TCGA-MP-A5C7	Unaltered	2		TCGA-2G-AALG	Unaltered	0
TCGA-A2-A0EQ	Unaltered	93		TCGA-P5-A72X	Unaltered	34		TCGA-CV-5443	Unaltered	9		TCGA-18-3408	Unaltered	2		TCGA-3G-AB0O	Unaltered	0
TCGA-02-0047	Unaltered	93		TCGA-A7-A425	Unaltered	34		TCGA-H7-A76A	Unaltered	9		TCGA-18-3411	Unaltered	2		TCGA-3G-AB0Q	Unaltered	0
TCGA-BA-5152	Unaltered	93		TCGA-AC-A8OS	Unaltered	34		TCGA-KO-8404	Unaltered	9		TCGA-22-1000	Unaltered	2		TCGA-4V-A9QN	Unaltered	0
TCGA-D6-8568	Unaltered	93		TCGA-AR-A0TU	Unaltered	34		TCGA-BP-4987	Unaltered	9		TCGA-39-5022	Unaltered	2		TCGA-5U-AB0D	Unaltered	0
TCGA-B0-5702	Altered	93		TCGA-AR-A24L	Unaltered	34		TCGA-BP-5170	Unaltered	9		TCGA-39-5029	Unaltered	2		TCGA-X7-A8DD	Unaltered	0
TCGA-B0-5703	Unaltered	93		TCGA-AR-A24O	Unaltered	34		TCGA-CZ-5467	Unaltered	9		TCGA-46-3767	Unaltered	2		TCGA-X7-A8DG	Unaltered	0
TCGA-BP-5190	Unaltered	93		TCGA-BH-A0C0	Unaltered	34		TCGA-IA-A83V	Unaltered	9		TCGA-56-5898	Unaltered	2		TCGA-X7-A8M0	Unaltered	0
TCGA-CZ-5457	Unaltered	93		TCGA-BH-A209	Unaltered	34		TCGA-CC-5260	Unaltered	9		TCGA-58-8393	Unaltered	2		TCGA-X7-A8M5	Unaltered	0
TCGA-55-6972	Unaltered	93		TCGA-BH-A8FY	Unaltered	34		TCGA-CC-5262	Unaltered	9		TCGA-85-8072	Unaltered	2		TCGA-XM-A8RF	Altered	0
TCGA-55-8092	Unaltered	93		TCGA-E2-A1LH	Altered	34		TCGA-DD-A1EL	Unaltered	9		TCGA-LA-A7SW	Unaltered	2		TCGA-XM-A8RG	Unaltered	0
TCGA-22-1002	Unaltered	93		TCGA-E9-A248	Unaltered	34		TCGA-DD-AACO	Unaltered	9		TCGA-3H-AB3K	Unaltered	2		TCGA-XU-AAXZ	Unaltered	0
TCGA-43-5670	Unaltered	93		TCGA-AG-3901	Unaltered	34		TCGA-DD-AADD	Unaltered	9		TCGA-LK-A4O6	Unaltered	2		TCGA-XU-AAY1	Unaltered	0
TCGA-90-7767	Unaltered	93		TCGA-AG-A01W	Unaltered	34		TCGA-DD-AAVP	Unaltered	9		TCGA-UD-AABZ	Unaltered	2		TCGA-YT-A95H	Unaltered	0
TCGA-XC-AA0X	Unaltered	93		TCGA-A6-5656	Unaltered	34		TCGA-55-8090	Unaltered	9		TCGA-UT-A88D	Unaltered	2		TCGA-ZB-A96M	Unaltered	0
TCGA-22-0940	Unaltered	93		TCGA-27-2526	Unaltered	34		TCGA-62-A46V	Unaltered	9		TCGA-XT-AASU	Unaltered	2		TCGA-BJ-A0ZE	Unaltered	0
TCGA-KC-A4BL	Unaltered	93		TCGA-CN-4733	Unaltered	34		TCGA-93-8067	Unaltered	9		TCGA-IB-A5SS	Unaltered	2		TCGA-BJ-A192	Unaltered	0
TCGA-X4-A8KQ	Unaltered	93		TCGA-CN-4734	Unaltered	34		TCGA-21-1071	Unaltered	9		TCGA-PZ-A5RE	Unaltered	2		TCGA-BJ-A3F0	Unaltered	0
TCGA-DX-AB2J	Unaltered	93		TCGA-CN-6024	Unaltered	34		TCGA-37-A5EN	Unaltered	9		TCGA-US-A779	Unaltered	2		TCGA-DE-A2OL	Unaltered	0
TCGA-DK-AA6M	Unaltered	92		TCGA-B4-5377	Unaltered	34		TCGA-77-6843	Unaltered	9		TCGA-YH-A8SY	Unaltered	2		TCGA-DJ-A1QE	Unaltered	0
TCGA-AC-A5XS	Altered	92		TCGA-B8-4146	Unaltered	34		TCGA-77-8153	Unaltered	9		TCGA-QR-A702	Unaltered	2		TCGA-DJ-A1QI	Unaltered	0
TCGA-AG-4015	Unaltered	92		TCGA-G6-A8L6	Altered	34		TCGA-85-8350	Unaltered	9		TCGA-QT-A5XJ	Unaltered	2		TCGA-DJ-A1QO	Unaltered	0
TCGA-B2-5641	Unaltered	92		TCGA-HE-A5NL	Unaltered	34		TCGA-SH-A9CT	Unaltered	9		TCGA-S7-A7WM	Unaltered	2		TCGA-DJ-A1QQ	Unaltered	0
TCGA-CW-5591	Altered	92		TCGA-UZ-A9PO	Unaltered	34		TCGA-P7-A5NX	Unaltered	9		TCGA-SP-A6QF	Unaltered	2		TCGA-DJ-A2PW	Unaltered	0
TCGA-49-6744	Altered	92		TCGA-2Y-A9GS	Unaltered	34		TCGA-QR-A6GW	Unaltered	9		TCGA-4L-AA1F	Unaltered	2		TCGA-DJ-A2PY	Unaltered	0
TCGA-RW-A688	Unaltered	92		TCGA-DD-A3A7	Unaltered	34		TCGA-RW-A689	Unaltered	9		TCGA-CH-5740	Unaltered	2		TCGA-DJ-A2Q0	Unaltered	0
TCGA-EJ-5514	Unaltered	92		TCGA-DD-AADR	Unaltered	34		TCGA-XK-AAJA	Unaltered	9		TCGA-CH-5751	Unaltered	2		TCGA-DJ-A3UT	Unaltered	0
TCGA-A5-A0VO	Unaltered	92		TCGA-69-7973	Unaltered	34		TCGA-YL-A8S9	Unaltered	9		TCGA-CH-5764	Unaltered	2		TCGA-DJ-A3VM	Unaltered	0
TCGA-4Z-AA7W	Unaltered	91		TCGA-73-4676	Altered	34		TCGA-DX-A6YU	Unaltered	9		TCGA-EJ-5510	Unaltered	2		TCGA-DO-A1K0	Unaltered	0
TCGA-G2-AA3C	Unaltered	91		TCGA-3B-A9HQ	Unaltered	34		TCGA-N1-A6IA	Unaltered	9		TCGA-EJ-5511	Unaltered	2		TCGA-E3-A3E5	Unaltered	0
TCGA-E1-5307	Unaltered	91		TCGA-FX-A76Y	Unaltered	34		TCGA-EB-A3XB	Unaltered	9		TCGA-EJ-7788	Unaltered	2		TCGA-E8-A418	Unaltered	0
TCGA-AY-6196	Unaltered	91		TCGA-FR-A726	Unaltered	34		TCGA-EB-A6R0	Unaltered	9		TCGA-EJ-A65F	Unaltered	2		TCGA-EL-A3CZ	Unaltered	0
TCGA-CN-5360	Unaltered	91		TCGA-N6-A4VD	Unaltered	34		TCGA-GF-A2C7	Unaltered	9		TCGA-G9-6361	Unaltered	2		TCGA-EL-A3D4	Unaltered	0
TCGA-CV-5435	Unaltered	91		TCGA-AP-A0LN	Unaltered	34		TCGA-2G-AAFZ	Unaltered	9		TCGA-G9-A9S0	Unaltered	2		TCGA-EL-A3GV	Unaltered	0
TCGA-B8-4148	Unaltered	91		TCGA-AX-A3G7	Unaltered	34		TCGA-EL-A3D1	Unaltered	9		TCGA-HC-7212	Unaltered	2		TCGA-EL-A3GX	Unaltered	0
TCGA-BQ-5875	Altered	91		TCGA-OR-A5JP	Unaltered	33		TCGA-ET-A3BV	Altered	9		TCGA-HC-7740	Unaltered	2		TCGA-EL-A3MY	Unaltered	0
TCGA-G7-6789	Unaltered	91		TCGA-FD-A3SP	Unaltered	33		TCGA-ND-A4WC	Altered	9		TCGA-HC-8264	Unaltered	2		TCGA-EL-A3TB	Unaltered	0
TCGA-DD-AACV	Unaltered	91		TCGA-R3-A69X	Unaltered	33		TCGA-ND-A4WA	Unaltered	9		TCGA-HC-A631	Unaltered	2		TCGA-EL-A3ZO	Unaltered	0
TCGA-49-4488	Unaltered	91		TCGA-DB-5281	Unaltered	33		TCGA-4E-A92E	Unaltered	9		TCGA-HC-A6AN	Unaltered	2		TCGA-EL-A4K7	Unaltered	0
TCGA-50-6673	Unaltered	91		TCGA-FG-5964	Unaltered	33		TCGA-B5-A0JT	Unaltered	9		TCGA-HC-A76X	Unaltered	2		TCGA-EL-A4KG	Unaltered	0
TCGA-KS-A41F	Unaltered	91		TCGA-A7-A13F	Unaltered	33		TCGA-BG-A0RY	Unaltered	9		TCGA-J4-A67M	Unaltered	2		TCGA-EM-A1CT	Unaltered	0
TCGA-EY-A1GE	Unaltered	91		TCGA-BH-A18J	Unaltered	33		TCGA-D1-A16G	Unaltered	9		TCGA-J4-A83J	Unaltered	2		TCGA-EM-A1YE	Unaltered	0
TCGA-C4-A0F0	Unaltered	90		TCGA-E2-A153	Unaltered	33		TCGA-KP-A3W4	Unaltered	9		TCGA-J4-AAU2	Unaltered	2		TCGA-EM-A2CR	Unaltered	0
TCGA-G2-A2EC	Unaltered	90		TCGA-E9-A1N5	Unaltered	33		TCGA-WC-AA9E	Unaltered	9		TCGA-J9-A8CP	Unaltered	2		TCGA-EM-A2OV	Unaltered	0
TCGA-XF-A9T0	Unaltered	90		TCGA-OL-A5RU	Unaltered	33		TCGA-4Z-AA7S	Unaltered	8		TCGA-KK-A6DY	Unaltered	2		TCGA-EM-A2OW	Unaltered	0
TCGA-D8-A13Y	Unaltered	90		TCGA-PE-A5DD	Unaltered	33		TCGA-E7-A5KE	Unaltered	8		TCGA-KK-A6E5	Unaltered	2		TCGA-EM-A2OY	Unaltered	0
TCGA-EW-A1P6	Unaltered	90		TCGA-C5-A7UE	Unaltered	33		TCGA-GC-A4ZW	Unaltered	8		TCGA-KK-A7AP	Unaltered	2		TCGA-EM-A2OZ	Unaltered	0
TCGA-A6-A56B	Unaltered	90		TCGA-C5-A8XH	Unaltered	33		TCGA-GC-A6I1	Unaltered	8		TCGA-KK-A8IJ	Unaltered	2		TCGA-EM-A2P0	Unaltered	0
TCGA-CK-4947	Unaltered	90		TCGA-EA-A1QT	Unaltered	33		TCGA-GU-A42P	Unaltered	8		TCGA-YL-A8HO	Unaltered	2		TCGA-EM-A3AN	Unaltered	0
TCGA-BP-5185	Unaltered	90		TCGA-VS-A8EB	Unaltered	33		TCGA-IK-8125	Unaltered	8		TCGA-3B-A9I1	Unaltered	2		TCGA-EM-A3FJ	Unaltered	0
TCGA-CW-5581	Unaltered	90		TCGA-D5-6533	Unaltered	33		TCGA-S9-A6TW	Unaltered	8		TCGA-DX-A48N	Unaltered	2		TCGA-EM-A3ST	Unaltered	0
TCGA-BC-A8YO	Unaltered	90		TCGA-P3-A6T0	Unaltered	33		TCGA-A2-A0D0	Unaltered	8		TCGA-DX-A48O	Unaltered	2		TCGA-EM-A3SX	Unaltered	0
TCGA-22-5479	Unaltered	90		TCGA-P3-A6T7	Unaltered	33		TCGA-A2-A259	Unaltered	8		TCGA-DX-A6BE	Unaltered	2		TCGA-EM-A4FF	Unaltered	0
TCGA-60-2720	Altered	90		TCGA-BP-4161	Altered	33		TCGA-A7-A26F	Unaltered	8		TCGA-DX-A7ET	Unaltered	2		TCGA-ET-A25I	Unaltered	0
TCGA-OR-A5JG	Unaltered	89		TCGA-MH-A856	Unaltered	33		TCGA-A8-A07B	Unaltered	8		TCGA-FX-A2QS	Unaltered	2		TCGA-ET-A2MZ	Unaltered	0
TCGA-HT-7479	Unaltered	89		TCGA-G3-A6UC	Unaltered	33		TCGA-AN-A041	Unaltered	8		TCGA-JV-A5VE	Unaltered	2		TCGA-ET-A2N0	Unaltered	0
TCGA-A8-A09G	Unaltered	89		TCGA-05-4417	Unaltered	33		TCGA-AN-A04C	Unaltered	8		TCGA-LI-A9QH	Altered	2		TCGA-ET-A3BQ	Unaltered	0
TCGA-CI-6621	Unaltered	89		TCGA-44-3919	Unaltered	33		TCGA-AN-A0FW	Unaltered	8		TCGA-MB-A5YA	Unaltered	2		TCGA-ET-A3BW	Unaltered	0
TCGA-14-0789	Unaltered	89		TCGA-33-4532	Unaltered	33		TCGA-AO-A12B	Unaltered	8		TCGA-QQ-A5V9	Unaltered	2		TCGA-ET-A3DS	Unaltered	0
TCGA-BQ-7045	Unaltered	89		TCGA-85-A4CL	Unaltered	33		TCGA-AQ-A04H	Unaltered	8		TCGA-RN-AAAQ	Unaltered	2		TCGA-ET-A3DV	Unaltered	0
TCGA-44-7667	Unaltered	89		TCGA-NQ-A57I	Unaltered	33		TCGA-B6-A0IQ	Unaltered	8		TCGA-Z4-A9VC	Unaltered	2		TCGA-ET-A3DW	Unaltered	0
TCGA-53-A4EZ	Unaltered	89		TCGA-VP-A878	Unaltered	33		TCGA-C8-A12Q	Unaltered	8		TCGA-EB-A3XD	Unaltered	2		TCGA-FE-A235	Unaltered	0
TCGA-21-1081	Unaltered	89		TCGA-DX-A8BV	Unaltered	33		TCGA-E2-A14Q	Unaltered	8		TCGA-EB-A42Y	Unaltered	2		TCGA-FK-A3SH	Unaltered	0
TCGA-58-A46N	Unaltered	89		TCGA-X9-A971	Unaltered	33		TCGA-Q1-A73P	Unaltered	8		TCGA-2G-AAG0	Unaltered	2		TCGA-FY-A2QD	Unaltered	0
TCGA-FR-A3R1	Unaltered	89		TCGA-GN-A4U5	Unaltered	33		TCGA-VS-A954	Unaltered	8		TCGA-2G-AAGW	Unaltered	2		TCGA-FY-A3I5	Unaltered	0
TCGA-D1-A1NU	Unaltered	89		TCGA-XU-A92O	Unaltered	33		TCGA-AF-5654	Unaltered	8		TCGA-2G-AAKM	Unaltered	2		TCGA-FY-A3R8	Unaltered	0
TCGA-OR-A5K6	Unaltered	88		TCGA-FI-A2D2	Unaltered	33		TCGA-AG-A011	Unaltered	8		TCGA-VF-A8A8	Unaltered	2		TCGA-FY-A3W9	Unaltered	0
TCGA-GD-A3OP	Unaltered	88		TCGA-BL-A13J	Unaltered	32		TCGA-AG-A01J	Unaltered	8		TCGA-XY-A8S3	Unaltered	2		TCGA-IM-A3U3	Unaltered	0
TCGA-CN-4738	Unaltered	88		TCGA-DB-A4XB	Unaltered	32		TCGA-AG-A02X	Unaltered	8		TCGA-ZM-AA05	Unaltered	2		TCGA-IM-A420	Unaltered	0
TCGA-3Z-A93Z	Unaltered	88		TCGA-DU-6401	Unaltered	32		TCGA-CI-6622	Unaltered	8		TCGA-3G-AB19	Unaltered	2		TCGA-J8-A3YE	Unaltered	0
TCGA-AS-3778	Unaltered	88		TCGA-E1-A7Z3	Unaltered	32		TCGA-5M-AATE	Unaltered	8		TCGA-5K-AAAP	Unaltered	2		TCGA-J8-A4HY	Unaltered	0
TCGA-CJ-4869	Unaltered	88		TCGA-R8-A6MK	Unaltered	32		TCGA-A6-5660	Unaltered	8		TCGA-XM-A8R9	Unaltered	2		TCGA-KS-A4I7	Unaltered	0
TCGA-73-7498	Unaltered	88		TCGA-A2-A0YT	Unaltered	32		TCGA-A6-6138	Unaltered	8		TCGA-XM-AAZ3	Unaltered	2		TCGA-N5-A4R8	Unaltered	0
TCGA-86-A4P7	Unaltered	88		TCGA-A8-A08A	Unaltered	32		TCGA-AA-3980	Unaltered	8		TCGA-YT-A95F	Unaltered	2		TCGA-N5-A4RJ	Unaltered	0
TCGA-HC-8265	Unaltered	88		TCGA-AN-A0XN	Unaltered	32		TCGA-AZ-6599	Unaltered	8		TCGA-ZB-A96I	Unaltered	2		TCGA-N6-A4V9	Unaltered	0
TCGA-WK-A8XT	Unaltered	88		TCGA-AO-A0JD	Unaltered	32		TCGA-CA-6719	Unaltered	8		TCGA-BJ-A290	Unaltered	2		TCGA-N6-A4VF	Unaltered	0
TCGA-BT-A20Q	Unaltered	87		TCGA-EW-A6SB	Unaltered	32		TCGA-CM-5341	Unaltered	8		TCGA-DJ-A2PQ	Unaltered	2		TCGA-N9-A4Q3	Unaltered	0
TCGA-CF-A9FF	Unaltered	87		TCGA-DS-A3LQ	Unaltered	32		TCGA-DM-A1D0	Unaltered	8		TCGA-DJ-A3VL	Unaltered	2		TCGA-NA-A4QV	Unaltered	0
TCGA-GC-A3RC	Unaltered	87		TCGA-EK-A2PK	Unaltered	32		TCGA-F4-6855	Unaltered	8		TCGA-EL-A3CO	Unaltered	2		TCGA-QM-A5NM	Unaltered	0
TCGA-HT-8012	Unaltered	87		TCGA-ZJ-AAXD	Unaltered	32		TCGA-G4-6294	Unaltered	8		TCGA-EL-A3H2	Unaltered	2		TCGA-N8-A4PQ	Unaltered	0
TCGA-A8-A06Z	Unaltered	87		TCGA-GS-A9TW	Unaltered	32		TCGA-GS-A9TU	Unaltered	8		TCGA-EL-A3H7	Unaltered	2		TCGA-A5-A3LP	Unaltered	0
TCGA-AC-A23C	Unaltered	87		TCGA-27-2528	Unaltered	32		TCGA-06-2567	Unaltered	8		TCGA-EL-A3T1	Unaltered	2		TCGA-AJ-A2QN	Unaltered	0
TCGA-CV-7101	Unaltered	87		TCGA-28-5216	Altered	32		TCGA-26-5136	Unaltered	8		TCGA-EL-A3ZQ	Unaltered	2		TCGA-AP-A0L9	Unaltered	0
TCGA-EV-5903	Unaltered	87		TCGA-CV-6939	Unaltered	32		TCGA-27-1837	Unaltered	8		TCGA-EL-A4JZ	Unaltered	2		TCGA-AP-A0LH	Unaltered	0
TCGA-2Y-A9H4	Unaltered	87		TCGA-AK-3455	Altered	32		TCGA-06-0157	Unaltered	8		TCGA-IM-A3U2	Unaltered	2		TCGA-AP-A5FX	Altered	0
TCGA-ED-A8O6	Unaltered	87		TCGA-B0-5099	Unaltered	32		TCGA-06-0132	Unaltered	8		TCGA-N7-A4Y8	Unaltered	2		TCGA-AX-A05W	Unaltered	0
TCGA-G3-AAV1	Unaltered	87		TCGA-B2-4099	Unaltered	32		TCGA-CN-6010	Altered	8		TCGA-QN-A5NN	Unaltered	2		TCGA-AX-A1C7	Unaltered	0
TCGA-MI-A75H	Unaltered	87		TCGA-BP-4991	Unaltered	32		TCGA-CQ-A4CB	Unaltered	8		TCGA-NA-A4R0	Unaltered	2		TCGA-AX-A1CI	Unaltered	0
TCGA-80-5611	Unaltered	87		TCGA-CJ-5677	Unaltered	32		TCGA-CV-6936	Unaltered	8		TCGA-A5-A0GN	Unaltered	2		TCGA-AX-A3FW	Unaltered	0
TCGA-86-8672	Unaltered	87		TCGA-CJ-5680	Unaltered	32		TCGA-CV-7407	Unaltered	8		TCGA-AX-A06L	Unaltered	2		TCGA-AX-A3GI	Unaltered	0
TCGA-FC-7961	Unaltered	87		TCGA-G6-A5PC	Unaltered	32		TCGA-HD-8635	Unaltered	8		TCGA-AX-A3FX	Altered	2		TCGA-B5-A0JS	Unaltered	0
TCGA-WP-A9GB	Unaltered	87		TCGA-2Z-A9JN	Unaltered	32		TCGA-MT-A7BN	Unaltered	8		TCGA-B5-A0K1	Unaltered	2		TCGA-B5-A0K0	Unaltered	0
TCGA-G2-A2ES	Unaltered	86		TCGA-A4-A5DU	Unaltered	32		TCGA-RS-A6TO	Unaltered	8		TCGA-B5-A11Q	Unaltered	2		TCGA-B5-A0K8	Unaltered	0
TCGA-ZF-AA4V	Unaltered	86		TCGA-UZ-A9PV	Unaltered	32		TCGA-KN-8424	Unaltered	8		TCGA-BG-A0MI	Unaltered	2		TCGA-B5-A11M	Unaltered	0
TCGA-E1-5319	Unaltered	86		TCGA-BC-A69H	Unaltered	32		TCGA-A3-3362	Unaltered	8		TCGA-BG-A0MO	Unaltered	2		TCGA-B5-A3S1	Unaltered	0
TCGA-P5-A736	Unaltered	86		TCGA-DD-AAE2	Unaltered	32		TCGA-BP-4167	Unaltered	8		TCGA-BG-A0VT	Unaltered	2		TCGA-BG-A0M7	Unaltered	0
TCGA-W5-AA2G	Unaltered	86		TCGA-WX-AA46	Unaltered	32		TCGA-BP-4983	Altered	8		TCGA-BS-A0V7	Unaltered	2		TCGA-BS-A0UT	Unaltered	0
TCGA-19-2629	Unaltered	86		TCGA-67-6217	Unaltered	32		TCGA-CJ-4902	Unaltered	8		TCGA-D1-A0ZR	Unaltered	2		TCGA-D1-A16R	Altered	0
TCGA-CQ-5332	Unaltered	86		TCGA-78-7633	Unaltered	32		TCGA-CJ-5684	Altered	8		TCGA-D1-A169	Unaltered	2		TCGA-DI-A2QY	Unaltered	0
TCGA-B8-A7U6	Unaltered	86		TCGA-MP-A4SW	Unaltered	32		TCGA-B3-4104	Unaltered	8		TCGA-D1-A17N	Unaltered	2		TCGA-EO-A1Y7	Unaltered	0
TCGA-2Z-A9JP	Unaltered	86		TCGA-NC-A5HO	Unaltered	32		TCGA-B9-4117	Unaltered	8		TCGA-D1-A17T	Unaltered	2		TCGA-EO-A1Y8	Unaltered	0
TCGA-05-5425	Unaltered	86		TCGA-MQ-A6BL	Unaltered	32		TCGA-KV-A6GD	Unaltered	8		TCGA-D1-A1NX	Unaltered	2		TCGA-EY-A1GM	Unaltered	0
TCGA-55-8203	Unaltered	86		TCGA-2L-AAQE	Unaltered	32		TCGA-UN-AAZ9	Unaltered	8		TCGA-DF-A2KR	Unaltered	2		TCGA-EY-A214	Unaltered	0
TCGA-MP-A4TD	Unaltered	86		TCGA-3B-A9HV	Unaltered	32		TCGA-BC-A5W4	Unaltered	8		TCGA-DI-A2QT	Unaltered	2		TCGA-EY-A4KR	Unaltered	0
TCGA-33-4538	Unaltered	86		TCGA-XE-A9SE	Unaltered	32		TCGA-DD-A39Z	Unaltered	8		TCGA-EY-A1GD	Unaltered	2		TCGA-K6-A3WQ	Unaltered	0
TCGA-60-2695	Altered	86		TCGA-XE-AANI	Unaltered	32		TCGA-DD-A3A6	Unaltered	8		TCGA-EY-A1GL	Unaltered	2		TCGA-KP-A3W1	Unaltered	0
TCGA-XU-A932	Unaltered	86		TCGA-NG-A4VW	Unaltered	32		TCGA-DD-AACU	Unaltered	8		TCGA-EY-A210	Unaltered	2		TCGA-SJ-A6ZJ	Unaltered	0
TCGA-HT-8013	Unaltered	85		TCGA-OR-A5LT	Unaltered	31		TCGA-DD-AADC	Unaltered	8		TCGA-EY-A3QX	Unaltered	2		TCGA-V4-A9EX	Unaltered	0
TCGA-CA-5796	Unaltered	85		TCGA-CF-A3MG	Unaltered	31		TCGA-DD-AAE9	Unaltered	8		TCGA-FI-A3PX	Unaltered	2		TCGA-V4-A9E9	Unaltered	0
TCGA-D5-6539	Unaltered	85		TCGA-KQ-A41S	Unaltered	31		TCGA-RC-A7SB	Unaltered	8		TCGA-V4-A9F8	Unaltered	2		TCGA-WC-A882	Unaltered	0
TCGA-06-0649	Unaltered	85		TCGA-CS-5394	Unaltered	31		TCGA-ZP-A9CV	Unaltered	8		TCGA-V4-A9EK	Unaltered	2		TCGA-YZ-A984	Unaltered	0
TCGA-CV-7425	Unaltered	85		TCGA-DU-A6S3	Unaltered	31		TCGA-49-4512	Unaltered	8		TCGA-V4-A9EI	Unaltered	2		TCGA-YZ-A980	Unaltered	0
TCGA-DQ-7588	Unaltered	85		TCGA-HT-7902	Unaltered	31		TCGA-49-AAR0	Unaltered	8		TCGA-WC-A881	Unaltered	2		TCGA-WC-A888	Unaltered	0
TCGA-T2-A6WX	Unaltered	85		TCGA-3C-AALJ	Unaltered	31		TCGA-69-8253	Unaltered	8		TCGA-OR-A5J9	Unaltered	1		TCGA-V4-A9EZ	Unaltered	0
TCGA-CJ-4639	Altered	85		TCGA-AR-A1AQ	Unaltered	31		TCGA-97-8177	Unaltered	8		TCGA-OR-A5JA	Altered	1		TCGA-WC-A87W	Unaltered	0
TCGA-2V-A95S	Unaltered	85		TCGA-AR-A24U	Unaltered	31		TCGA-97-A4M5	Unaltered	8		TCGA-OR-A5JE	Unaltered	1		TCGA-VD-AA8Q	Unaltered	0
TCGA-MI-A75C	Unaltered	85		TCGA-E2-A573	Unaltered	31		TCGA-MP-A4TH	Unaltered	8		TCGA-OR-A5K4	Unaltered	1		TCGA-V4-A9EY	Unaltered	0
TCGA-50-5931	Unaltered	85		TCGA-E9-A1RE	Unaltered	31		TCGA-NJ-A7XG	Unaltered	8		TCGA-OR-A5L3	Unaltered	1		TCGA-WC-A883	Unaltered	0
TCGA-DK-A1A6	Unaltered	84		TCGA-OL-A66N	Unaltered	31		TCGA-39-5021	Unaltered	8		TCGA-OR-A5L5	Unaltered	1		TCGA-CR-6473	Unaltered	31
TCGA-FD-A3N5	Unaltered	84		TCGA-Q1-A73O	Unaltered	31		TCGA-56-8309	Unaltered	8		TCGA-OR-A5LL	Unaltered	1		TCGA-BT-A20V	Unaltered	1
TCGA-FD-A3SJ	Unaltered	84		TCGA-AH-6544	Unaltered	31		TCGA-90-A59Q	Unaltered	8		TCGA-2F-A9KQ	Unaltered	1
