# Supplementary material for: Prognostic and therapeutic roles of SETD2 in cutaneous melanoma
Source: Aging (Albany NY). 2024 Jun 5;16(11):9692–708. doi: 10.18632/aging.205894 (PMC11210245; doi:10.18632/aging.205894)
Supplement: Supplementary Table 12 [file aging-16-205894-s013.xlsx]

## Sheet: Supplementary Table 12
Supplementary Table 12. Western blotting analysis by SETD2 inhibtor EZM0414.
	GAPDH			SETD2			H3k36me		P-ATM				ATM
	H3K9				MSH6		PMS2			HLH1			MSH2
	Group	GAPDH		SETD2	AreaSETD2/AreaGAPDH	Normalize		H3k36me	AreaSETD2/AreaGAPDH	Normalize		H3k9me	AreaSETD2/AreaGAPDH	Normalize								ATM	目的蛋白/GAPDH	相对值		H2B	目的蛋白/GAPDH	相对值
	-	7311.65		9139.38	1.24997	1		20878	2.85545			17983.5	2.45957									9562.72	1.30787	1		10746	1.4697	1
	25(μg/mL)	8830.35		8052.35	0.911895	0.729531		20334.9	2.30284	0.806473		16259.9	1.84136	0.748652								9183.89	1.04004	0.795211		8080.48	0.91508	0.622628
	50(μg/mL)	7865.48		7769.23	0.987764	0.790227		13925.8	1.7705	0.620043		13623.8	1.7321	0.704226								7496.11	0.95304	0.728694		4944.23	0.628599	0.427705
	100(μg/mL)	4960.23		572.556	0.115429	0.0923452		1049.11	0.211505	0.0740706		4488.98	0.904994	0.367948								3654.48	0.736755	0.563322		3828.94	0.771927	0.525226
			Group	ATM	AreaSETD2/AreaGAPDH	Normalize		phospho-ATM	AreaSETD2/AreaGAPDH	Normalize		MSH6	AreaSETD2/AreaGAPDH	Normalize
			-	9562.72	1.30787	1		8676.72	1.1867	1		9180.84	1.25565	1
			25(μg/mL)	9183.89	1.04004	0.795211		7627.01	0.863727	0.72784		7555.11	0.855584	0.68139
			50(μg/mL)	7496.11	0.95304	0.728694		6954.89	0.88423	0.745118		7846.77	0.997622	0.794509
			100(μg/mL)	3654.48	0.736755	0.563322		799.335	0.161149	0.135796		1852.23	0.373417	0.29739
			Group	MSH2	AreaSETD2/AreaGAPDH	Normalize		HLH1	AreaSETD2/AreaGAPDH	Normalize		PMS2	AreaSETD2/AreaGAPDH	Normalize				H3K36	目的蛋白/GAPDH	相对值
			-	9664.01	1.32173	1		7543.55	1.03172	1		9427.35	1.28936	1				8082.26	1.10539	1
			25(μg/mL)	8976.77	1.01658	0.76913		6336.35	0.717565	0.695506		8345.35	0.945076	0.73298				8890.84	1.00685	0.910851
			50(μg/mL)	6549.89	0.832739	0.630038		5192.48	0.66016	0.639866		6960.18	0.884903	0.686311				9843.72	1.25151	1.13218
			100(μg/mL)	705.506	0.142232	0.107611		828.799	0.167089	0.161952		1180.75	0.238043	0.184621				5051.48	1.01839	0.921295
	Group	GAPDH		SETD2	AreaSETD2/AreaGAPDH	Normalize		H3k36me	AreaSETD2/AreaGAPDH	Normalize		H3k9me	AreaSETD2/AreaGAPDH	Normalize
	-	21158.5		22765.2	1.07593			19038.2	0.899789			17396.4	0.822191
	25(μg/mL)	21129.1		19424.6	0.919331	0.854451		17008.2	0.804967	0.894618		15530.4	0.735025	0.893983
	50(μg/mL)	24306.3		18836.6	0.77497	0.720278		11776.4	0.484501	0.53846		12765.5	0.525192	0.638771
	100(μg/mL)	11510.3		1597.75	0.13881	0.129014		984.527	0.085534	0.09506		4331.23	0.37629	0.457667
			Group	ATM	AreaSETD2/AreaGAPDH	Normalize		phospho-ATM	AreaSETD2/AreaGAPDH	Normalize		MSH6	AreaSETD2/AreaGAPDH	Normalize
			-	25629.4	1.2113			21480.9	1.01523			23033.9	1.08863
			25(μg/mL)	22215	1.0514	0.86799		20652.1	0.977425	0.962758		18610.7	0.88081	0.809099
			50(μg/mL)	18245.8	0.750661	0.619715		19668.5	0.809192	0.79705		19527.6	0.803396	0.737987
			100(μg/mL)	9618.64	0.835652	0.689879		3035.13	0.263687	0.259731		4569.98	0.397033	0.364708
			Group	MSH2	AreaSETD2/AreaGAPDH	Normalize		HLH1	AreaSETD2/AreaGAPDH	Normalize		PMS2	AreaSETD2/AreaGAPDH	Normalize
			-	22791	1.07715			18460.4	0.872482			23033.9	1.08863
			25(μg/mL)	22770.9	1.0777	1.00051		15520.8	0.734572	0.841934		18610.7	0.88081	0.809099
			50(μg/mL)	16734.2	0.688474	0.639161		12695.3	0.522307	0.598645		19527.6	0.803396	0.737987
			100(μg/mL)	2010.11	0.174635	0.162127		1772.87	0.154024	0.176536		4569.98	0.397033	0.364708
		Group	25(μg/mL)	50(μg/mL)	100(μg/mL)				Group	25(μg/mL)	50(μg/mL)	100(μg/mL)
		SETD2	0.729531	0.790227	0.0923452				SETD2	0.854451	0.720278	0.129014
		H3k36me	0.806473	0.620043	0.0740706				H3k36me	0.894618	0.53846	0.0950602
		H3k9me	0.748652	0.704226	0.367948				H3k9me	0.893983	0.638771	0.457667
		ATM	0.795211	0.728694	0.563322				ATM	0.86799	0.619715	0.689879
		phospho-ATM	0.72784	0.745118	0.135796				phospho-ATM	0.962758	0.79705	0.259731
		MSH6	0.68139	0.794509	0.29739				MSH6	0.809099	0.737987	0.364708
		MSH2	0.76913	0.630038	0.107611				MSH2	1.00051	0.639161	0.162127
		HLH1	0.695506	0.639866	0.161952				HLH1	0.841934	0.598645	0.176536
		PMS2	0.73298	0.686311	0.184621				PMS2	0.809099	0.737987	0.364708
