# Supplementary material for: Prognostic and therapeutic roles of SETD2 in cutaneous melanoma
Source: Aging (Albany NY). 2024 Jun 5;16(11):9692–708. doi: 10.18632/aging.205894 (PMC11210245; doi:10.18632/aging.205894)
Supplement: Supplementary Table 13 [file aging-16-205894-s014.xlsx]

## Sheet: Supplementary Table 13
Supplementary Table 13. Cell cycle analysis A375 with or without SETD2 expression.
	A375 WT
A375 SETD2-KO
